# Supplementary material for: Transcriptional profiling of two muscadine grape cultivars “Carlos” and “Noble” to reveal new genes, gene regulatory networks, and pathways that involved in grape berry ripening
Source: Front Plant Sci. 2022 Aug 11;13:949383. doi: 10.3389/fpls.2022.949383 (PMC9435441; doi:10.3389/fpls.2022.949383)
Supplement: SUPPLEMENTARY TABLE 2 — E-L 32-specific, E-L 35-specific, and E-L 38-specific genes list and GO-term enrichment analysis in ‘Noble’. [file Table_2.XLSX]

## Sheet: Gene list
	S5/S6 S5/S7-NOB S6/S7	839						VIT_13s0320g00050									S5/S7-NOB	964	VIT_07s0031g00080
			VIT_10s0003g01010			S5/S6	527	VIT_01s0127g00360			S6/S7	263	VIT_04s0023g00790						VIT_08s0007g06260
			VIT_15s0021g00220					VIT_12s0057g00560					VIT_05s0077g01000						VIT_02s0025g01400
			VIT_18s0001g15100					VIT_07s0031g01490					VIT_07s0129g00830						VIT_17s0000g08070
			VIT_08s0007g07920					VIT_12s0057g00640					VIT_17s0000g00710						VIT_07s0005g00210
			VIT_08s0058g00350					VIT_17s0000g07580					VIT_08s0007g01620						VIT_01s0011g04460
			VIT_13s0156g00030					VIT_14s0066g00460					VIT_13s0101g00300						VIT_06s0004g06110
			VIT_10s0071g00320					VIT_17s0000g01210					VIT_19s0014g05050						VIT_04s0044g00150
			VIT_14s0219g00110					VIT_01s0137g00550					VIT_19s0014g01450						VIT_08s0007g05650
			VIT_07s0031g03220					VIT_18s0001g01770					VIT_12s0028g02960						VIT_14s0006g02590
			VIT_19s0014g03160					VIT_08s0007g03760					VIT_19s0090g00860						VIT_07s0104g01340
			VIT_14s0060g01830					VIT_06s0009g03670					VIT_11s0016g03400						VIT_07s0005g00120
			VIT_01s0011g00590					VIT_14s0108g00270					VIT_07s0129g00350						VIT_08s0056g01620
			VIT_06s0009g03350					VIT_16s0050g00160					VIT_04s0023g01630						VIT_08s0007g01840
			VIT_06s0004g07790					VIT_06s0004g00050					VIT_11s0065g00170						VIT_04s0044g01080
			VIT_18s0001g11170					VIT_12s0028g03600					VIT_17s0000g07620						VIT_04s0008g01360
			VIT_12s0059g01190					VIT_03s0091g00430					VIT_02s0012g01760						VIT_05s0124g00540
			VIT_08s0007g08680					VIT_01s0026g02350					VIT_12s0034g01480						VIT_15s0048g02550
			VIT_14s0066g01950					VIT_16s0100g00420					VIT_01s0150g00040						VIT_08s0058g01140
			VIT_02s0025g01360					VIT_04s0008g02070					VIT_10s0003g00800						VIT_16s0022g01870
			VIT_11s0016g05840					VIT_14s0068g02120					VIT_02s0025g00980						VIT_07s0005g02990
			VIT_04s0044g00750					VIT_18s0001g13660					VIT_09s0002g02890						VIT_16s0098g01750
			VIT_04s0008g05510					VIT_03s0017g02240					VIT_06s0080g00970						VIT_17s0000g08750
			VIT_06s0004g05650					VIT_13s0073g00150					VIT_08s0007g04230						VIT_14s0219g00140
			VIT_07s0005g00730					VIT_10s0003g00220					VIT_11s0016g00490						VIT_19s0014g02900
			VIT_11s0016g05320					VIT_02s0025g03510					VIT_09s0002g02900						VIT_14s0081g00710
			VIT_01s0010g00940					VIT_03s0063g00860					VIT_16s0039g01770						VIT_16s0050g01700
			VIT_03s0088g00140					VIT_14s0066g01200					VIT_19s0090g01490						VIT_01s0011g06080
			VIT_19s0014g05070					VIT_04s0008g01210					VIT_02s0025g00230						VIT_18s0041g00730
			VIT_05s0020g03030					VIT_14s0060g01960					VIT_17s0000g08330						VIT_16s0100g01250
			VIT_08s0040g00130					VIT_07s0129g00060					VIT_06s0004g04420						VIT_17s0000g01110
			VIT_08s0058g00950					VIT_18s0041g01330					VIT_03s0038g00490						VIT_07s0005g03540
			VIT_16s0050g01880					VIT_07s0031g00650					VIT_09s0002g05800						VIT_17s0000g09870
			VIT_06s0009g02920					VIT_11s0118g00490					VIT_12s0035g01960						VIT_04s0044g01010
			VIT_10s0003g00050					VIT_13s0019g04880					VIT_05s0020g01100						VIT_12s0034g01160
			VIT_12s0035g01340					VIT_14s0066g01580					VIT_18s0001g05340						VIT_06s0004g02370
			VIT_10s0116g01690					VIT_03s0038g00410					VIT_07s0005g01050						VIT_15s0048g00770
			VIT_07s0031g03000					VIT_03s0132g00090					VIT_08s0056g01120						VIT_01s0011g04020
			VIT_12s0035g02090					VIT_04s0023g00130					VIT_05s0094g01210						VIT_16s0100g00010
			VIT_05s0051g00930					VIT_07s0005g00330					VIT_01s0026g02370						VIT_06s0004g02140
			VIT_12s0034g01140					VIT_06s0061g01120					VIT_02s0154g00170						VIT_14s0066g01340
			VIT_07s0141g00690					VIT_04s0044g01120					VIT_10s0042g01390						VIT_03s0167g00220
			VIT_17s0000g04490					VIT_18s0041g01230					VIT_02s0025g01910						VIT_11s0016g05560
			VIT_12s0035g01710					VIT_14s0006g03060					VIT_07s0151g00800						VIT_03s0091g00700
			VIT_19s0027g01810					VIT_17s0000g01830					VIT_08s0058g01090						VIT_04s0023g03220
			VIT_06s0080g00980					VIT_01s0011g03010					VIT_08s0007g01370						VIT_08s0040g01610
			VIT_18s0122g00680					VIT_07s0031g02130					VIT_10s0116g00500						VIT_01s0010g00950
			VIT_16s0050g00370					VIT_03s0088g00650					VIT_05s0020g01570						VIT_19s0014g03640
			VIT_19s0085g00880					VIT_06s0080g00810					VIT_18s0001g13160						VIT_13s0019g04890
			VIT_18s0001g11710					VIT_01s0026g01720					VIT_05s0077g01010						VIT_16s0039g01520
			VIT_06s0061g00360					VIT_01s0026g02390					VIT_19s0014g04940						VIT_02s0012g00630
			VIT_11s0016g04750					VIT_09s0002g04480					VIT_02s0025g04490						VIT_19s0014g01390
			VIT_04s0023g02430					VIT_05s0094g00950					VIT_03s0017g01140						VIT_07s0005g01480
			VIT_05s0020g04780					VIT_09s0054g01770					VIT_17s0000g09170						VIT_18s0041g00490
			VIT_07s0031g02400					VIT_14s0060g00820					VIT_18s0001g11240						VIT_16s0050g00110
			VIT_06s0004g00960					VIT_17s0000g09130					VIT_02s0012g01940						VIT_11s0052g01800
			VIT_18s0001g09090					VIT_03s0063g02660					VIT_04s0008g02850						VIT_19s0090g01090
			VIT_08s0040g01540					VIT_13s0064g01270					VIT_08s0007g07960						VIT_07s0031g00220
			VIT_05s0049g00050					VIT_02s0241g00060					VIT_07s0104g01250						VIT_18s0072g01160
			VIT_03s0088g00060					VIT_13s0019g00330					VIT_01s0011g00410						VIT_01s0011g03690
			VIT_08s0032g00910					VIT_08s0056g01150					VIT_06s0080g00280						VIT_03s0063g01950
			VIT_12s0059g02420					VIT_14s0083g00800					VIT_13s0073g00330						VIT_12s0028g03910
			VIT_08s0040g00730					VIT_16s0100g00340					VIT_11s0016g00640						VIT_19s0014g00260
			VIT_18s0001g14450					VIT_06s0004g03620					VIT_04s0008g06760						VIT_16s0100g00840
			VIT_10s0003g00130					VIT_11s0016g00220					VIT_13s0067g01890						VIT_10s0003g00170
			VIT_12s0057g01330					VIT_04s0023g00760					VIT_12s0059g00280						VIT_14s0108g01450
			VIT_11s0016g04680					VIT_09s0002g01650					VIT_05s0062g01110						VIT_12s0178g00200
			VIT_16s0039g00820					VIT_05s0094g00820					VIT_13s0019g04740						VIT_03s0063g02310
			VIT_02s0154g00520					VIT_15s0048g01080					VIT_11s0016g02200						VIT_01s0011g05650
			VIT_12s0059g00150					VIT_07s0031g00340					VIT_09s0002g06300						VIT_08s0040g00310
			VIT_11s0016g03140					VIT_04s0008g02590					VIT_19s0090g01040						VIT_17s0000g08510
			VIT_01s0026g00580					VIT_01s0137g00070					VIT_16s0039g00930						VIT_07s0185g00170
			VIT_06s0009g01620					VIT_03s0017g01720					VIT_13s0047g01010						VIT_17s0000g04660
			VIT_18s0117g00340					VIT_04s0023g01100					VIT_18s0001g02100						VIT_12s0034g02440
			VIT_01s0010g00960					VIT_05s0020g03240					VIT_11s0016g02810						VIT_10s0003g03780
			VIT_06s0004g04860					VIT_08s0040g02760					VIT_05s0077g01750						VIT_17s0000g07540
			VIT_01s0011g05190					VIT_04s0023g01520					VIT_11s0016g03960						VIT_06s0009g01540
			VIT_01s0011g02320					VIT_14s0068g01870					VIT_14s0060g01320						VIT_12s0035g00890
			VIT_04s0008g04440					VIT_03s0088g01200					VIT_11s0016g05260						VIT_14s0068g01440
			VIT_11s0037g00440					VIT_17s0000g06610					VIT_18s0041g01290						VIT_11s0016g03110
			VIT_18s0041g00710					VIT_17s0000g07030					VIT_08s0007g03870						VIT_12s0059g02130
			VIT_11s0016g01220					VIT_04s0079g00290					VIT_06s0061g00230						VIT_05s0077g01220
			VIT_07s0031g00190					VIT_19s0014g05110					VIT_04s0044g01550						VIT_09s0054g01570
			VIT_14s0108g00440					VIT_04s0008g06730					VIT_03s0038g02310						VIT_18s0001g09990
			VIT_09s0002g04580					VIT_07s0031g03090					VIT_07s0031g01830						VIT_04s0008g04160
			VIT_01s0011g00760					VIT_16s0098g00990					VIT_05s0029g01260						VIT_16s0050g02240
			VIT_14s0060g01470					VIT_07s0104g00420					VIT_11s0016g00500						VIT_04s0044g01300
			VIT_18s0001g15550					VIT_08s0056g00820					VIT_01s0011g03670						VIT_09s0054g00930
			VIT_05s0077g00430					VIT_13s0019g04380					VIT_16s0022g01440						VIT_05s0029g01580
			VIT_15s0021g02300					VIT_14s0068g00890					VIT_14s0108g00070						VIT_13s0019g01490
			VIT_17s0053g00460					VIT_07s0031g02610					VIT_04s0008g03600						VIT_17s0000g01640
			VIT_08s0007g00440					VIT_04s0008g05410					VIT_13s0019g05190						VIT_14s0108g00540
			VIT_17s0053g00990					VIT_02s0012g01240					VIT_12s0035g01400						VIT_11s0016g04600
			VIT_18s0089g00170					VIT_13s0064g01020					VIT_10s0003g00330						VIT_19s0014g02520
			VIT_18s0001g13020					VIT_04s0008g02380					VIT_08s0007g07060						VIT_14s0108g01420
			VIT_06s0004g05310					VIT_04s0008g03430					VIT_13s0019g02380						VIT_07s0005g00670
			VIT_18s0001g13970					VIT_06s0004g07160					VIT_08s0007g00920						VIT_16s0098g00660
			VIT_17s0000g06960					VIT_12s0034g01810					VIT_17s0000g03910						VIT_10s0092g00060
			VIT_03s0063g01140					VIT_16s0022g02340					VIT_08s0007g08260						VIT_18s0001g13520
			VIT_06s0080g00920					VIT_01s0011g04650					VIT_06s0004g01110						VIT_16s0098g00770
			VIT_11s0052g00120					VIT_01s0011g04010					VIT_16s0013g01520						VIT_11s0016g04060
			VIT_05s0049g00950					VIT_14s0068g01950					VIT_10s0003g00580						VIT_16s0098g00870
			VIT_18s0001g11790					VIT_01s0011g00550					VIT_01s0011g04850						VIT_13s0067g03140
			VIT_12s0035g01910					VIT_17s0000g00130					VIT_18s0001g12100						VIT_09s0018g01540
			VIT_12s0055g00290					VIT_10s0071g01160					VIT_04s0008g04510						VIT_02s0025g03720
			VIT_01s0137g00540					VIT_07s0005g00630					VIT_08s0007g04610						VIT_18s0041g00330
			VIT_04s0023g03610					VIT_01s0010g00990					VIT_05s0077g00810						VIT_08s0007g06200
			VIT_14s0066g01520					VIT_11s0016g01300					VIT_10s0003g05800						VIT_11s0149g00230
			VIT_18s0001g13030					VIT_04s0008g03300					VIT_01s0150g00330						VIT_03s0038g03240
			VIT_04s0008g03950					VIT_01s0026g01570					VIT_19s0014g05090						VIT_11s0052g01120
			VIT_14s0066g01970					VIT_03s0038g04500					VIT_04s0023g03450						VIT_06s0004g08210
			VIT_08s0007g04100					VIT_16s0050g00040					VIT_18s0122g00780						VIT_13s0064g00440
			VIT_03s0038g04700					VIT_11s0052g00850					VIT_06s0004g03100						VIT_18s0001g12000
			VIT_08s0040g02190					VIT_14s0066g01830					VIT_16s0098g00580						VIT_06s0004g02410
			VIT_04s0008g01590					VIT_06s0004g04660					VIT_08s0058g00040						VIT_17s0000g08380
			VIT_16s0022g01430					VIT_09s0002g02340					VIT_11s0016g04010						VIT_09s0002g06820
			VIT_02s0025g01040					VIT_09s0002g00370					VIT_14s0060g00200						VIT_05s0020g03890
			VIT_18s0001g11580					VIT_01s0011g04320					VIT_06s0009g03450						VIT_05s0094g01650
			VIT_01s0010g01080					VIT_02s0025g04160					VIT_04s0043g00600						VIT_01s0146g00440
			VIT_01s0026g01250					VIT_16s0050g02260					VIT_08s0007g06290						VIT_11s0037g00390
			VIT_09s0002g04010					VIT_19s0093g00590					VIT_18s0164g00100						VIT_10s0003g04880
			VIT_08s0056g01520					VIT_02s0025g04670					VIT_04s0023g03600						VIT_10s0003g02780
			VIT_07s0129g00310					VIT_01s0011g01280					VIT_05s0077g01580						VIT_17s0000g06380
			VIT_07s0005g04920					VIT_17s0000g09710					VIT_18s0001g08200						VIT_12s0057g00990
			VIT_06s0009g03140					VIT_18s0122g01400					VIT_01s0137g00240						VIT_02s0012g00030
			VIT_19s0177g00280					VIT_05s0094g00530					VIT_08s0007g08960						VIT_17s0000g07510
			VIT_15s0048g02500					VIT_03s0038g04160					VIT_07s0104g00200						VIT_13s0047g00030
			VIT_12s0057g00630					VIT_12s0059g00440					VIT_07s0104g01240						VIT_09s0002g05070
			VIT_13s0067g01960					VIT_04s0008g06580					VIT_14s0128g00700						VIT_13s0084g00830
			VIT_04s0008g03550					VIT_14s0068g00520					VIT_07s0031g03100						VIT_14s0066g01440
			VIT_10s0071g00330					VIT_15s0046g01930					VIT_18s0166g00180						VIT_01s0010g02220
			VIT_07s0031g02950					VIT_02s0012g01440					VIT_18s0041g02120						VIT_05s0020g03130
			VIT_10s0071g00150					VIT_18s0072g00160					VIT_01s0010g01810						VIT_08s0007g08500
			VIT_06s0004g05730					VIT_04s0008g05590					VIT_07s0005g02210						VIT_06s0004g01540
			VIT_14s0083g01130					VIT_12s0035g01180					VIT_14s0066g01230						VIT_07s0031g00250
			VIT_11s0016g02900					VIT_18s0117g00210					VIT_09s0002g05560						VIT_04s0069g00960
			VIT_04s0023g02570					VIT_02s0025g02410					VIT_06s0004g06540						VIT_18s0001g00950
			VIT_01s0011g00600					VIT_04s0044g00720					VIT_03s0063g00830						VIT_08s0007g01820
			VIT_08s0032g00240					VIT_17s0000g06650					VIT_09s0002g04100						VIT_11s0078g00420
			VIT_18s0001g12020					VIT_18s0041g00690					VIT_14s0030g01950						VIT_14s0066g00290
			VIT_18s0001g10500					VIT_09s0002g06400					VIT_14s0108g00370						VIT_02s0154g00610
			VIT_17s0000g09610					VIT_06s0080g01230					VIT_02s0033g00770						VIT_16s0013g00940
			VIT_12s0028g03620					VIT_11s0016g03210					VIT_13s0019g03180						VIT_06s0004g07020
			VIT_11s0037g00290					VIT_15s0048g00270					VIT_01s0244g00160						VIT_02s0025g00210
			VIT_07s0104g00780					VIT_19s0014g01430					VIT_04s0023g00150						VIT_15s0048g00790
			VIT_19s0085g00800					VIT_18s0072g00980					VIT_11s0118g00210						VIT_18s0089g01170
			VIT_05s0049g01980					VIT_18s0001g11500					VIT_08s0040g01550						VIT_08s0058g01250
			VIT_03s0063g00770					VIT_01s0010g03980					VIT_14s0066g01710						VIT_08s0007g08860
			VIT_17s0000g08900					VIT_03s0091g01060					VIT_14s0060g01210						VIT_02s0012g01010
			VIT_08s0007g01910					VIT_06s0004g05050					VIT_06s0009g02500						VIT_16s0100g01310
			VIT_07s0031g00110					VIT_01s0011g01140					VIT_04s0023g02510						VIT_15s0046g03160
			VIT_02s0012g00940					VIT_07s0129g00210					VIT_12s0028g03860						VIT_10s0003g04470
			VIT_11s0016g05110					VIT_11s0016g04200					VIT_02s0025g03300						VIT_19s0014g02720
			VIT_08s0007g01050					VIT_02s0025g03020					VIT_11s0016g01760						VIT_18s0001g15450
			VIT_19s0177g00230					VIT_18s0001g00800					VIT_09s0002g01730						VIT_10s0116g00060
			VIT_13s0019g02930					VIT_04s0044g01040					VIT_07s0005g04340						VIT_02s0234g00100
			VIT_01s0127g00050					VIT_16s0022g00630					VIT_19s0014g03990						VIT_07s0005g05680
			VIT_08s0058g00440					VIT_03s0063g00380					VIT_03s0063g00530						VIT_10s0003g04280
			VIT_10s0116g01030					VIT_07s0151g00850					VIT_07s0129g00520						VIT_18s0001g13570
			VIT_12s0059g00560					VIT_05s0020g04600					VIT_11s0016g04640						VIT_03s0063g00350
			VIT_08s0007g05060					VIT_07s0151g00630					VIT_09s0002g08640						VIT_07s0104g00760
			VIT_14s0006g01250					VIT_15s0046g01880					VIT_19s0014g04530						VIT_03s0180g00070
			VIT_01s0011g02860					VIT_11s0052g00480					VIT_02s0025g04030						VIT_16s0050g00950
			VIT_17s0000g09550					VIT_01s0011g00920					VIT_03s0088g00160						VIT_17s0000g01660
			VIT_07s0005g02220					VIT_08s0040g01760					VIT_10s0003g00410						VIT_18s0001g06520
			VIT_03s0088g00270					VIT_08s0056g01470					VIT_04s0210g00170						VIT_08s0007g05540
			VIT_16s0098g01170					VIT_03s0132g00070					VIT_19s0090g01610						VIT_06s0004g01860
			VIT_12s0028g01880					VIT_12s0028g03800					VIT_10s0116g00990						VIT_01s0244g00120
			VIT_07s0095g00760					VIT_18s0001g14000					VIT_01s0011g03980						VIT_15s0024g01240
			VIT_06s0004g05790					VIT_12s0028g03300					VIT_08s0007g08380						VIT_03s0063g00640
			VIT_01s0011g01160					VIT_19s0085g00010					VIT_14s0081g00670						VIT_10s0092g00270
			VIT_08s0007g02290					VIT_18s0072g01000					VIT_05s0020g02000						VIT_13s0106g00710
			VIT_12s0059g00130					VIT_07s0005g00150					VIT_01s0011g03810						VIT_14s0128g00550
			VIT_07s0129g01100					VIT_06s0004g00690					VIT_16s0039g01420						VIT_14s0006g01900
			VIT_19s0015g00020					VIT_19s0014g03000					VIT_06s0004g03530						VIT_16s0039g00990
			VIT_16s0050g01110					VIT_08s0040g02520					VIT_11s0016g04880						VIT_10s0003g02430
			VIT_05s0020g02210					VIT_01s0011g01790					VIT_01s0011g03550						VIT_13s0073g00160
			VIT_16s0050g00240					VIT_11s0016g05010					VIT_04s0008g03160						VIT_05s0102g01140
			VIT_02s0154g00480					VIT_16s0100g00720					VIT_01s0011g05490						VIT_06s0004g04510
			VIT_06s0004g05400					VIT_10s0042g01180					VIT_02s0488g00020						VIT_18s0041g02170
			VIT_08s0007g01040					VIT_08s0007g03540					VIT_17s0000g01850						VIT_01s0011g00450
			VIT_11s0016g04260					VIT_10s0092g00210					VIT_16s0039g00340						VIT_05s0029g01140
			VIT_02s0025g01450					VIT_18s0001g05310					VIT_09s0002g02120						VIT_17s0000g09570
			VIT_02s0025g04550					VIT_04s0008g00650					VIT_09s0002g03620						VIT_05s0029g00190
			VIT_01s0026g00550					VIT_16s0050g00190					VIT_17s0000g02580						VIT_12s0059g01120
			VIT_02s0033g01400					VIT_19s0014g02980					VIT_14s0219g00120						VIT_04s0023g03240
			VIT_09s0054g00690					VIT_18s0001g01080					VIT_02s0025g00140						VIT_04s0044g00230
			VIT_07s0191g00250					VIT_10s0116g00960					VIT_07s0289g00080						VIT_09s0018g00310
			VIT_15s0046g00070					VIT_19s0090g01740					VIT_04s0023g00280						VIT_17s0000g04810
			VIT_08s0040g02970					VIT_08s0007g07730					VIT_09s0002g04150						VIT_08s0007g08530
			VIT_03s0038g03920					VIT_12s0028g03610					VIT_18s0001g04750						VIT_03s0038g04750
			VIT_14s0083g00620					VIT_11s0065g00310					VIT_17s0000g08320						VIT_06s0004g06510
			VIT_18s0001g09390					VIT_08s0040g02730					VIT_02s0025g04980						VIT_13s0019g01990
			VIT_12s0134g00160					VIT_13s0067g01270					VIT_16s0098g00940						VIT_14s0066g01870
			VIT_09s0002g05570					VIT_07s0005g03410					VIT_07s0095g00640						VIT_13s0047g01200
			VIT_18s0075g00270					VIT_09s0002g01450					VIT_02s0025g03230						VIT_03s0038g00790
			VIT_11s0016g01850					VIT_06s0080g01200					VIT_01s0026g02470						VIT_04s0023g03060
			VIT_08s0040g02340					VIT_12s0028g03580					VIT_08s0040g00980						VIT_18s0001g09910
			VIT_16s0098g01870					VIT_08s0007g07640					VIT_17s0000g04560						VIT_06s0061g00020
			VIT_09s0002g00420					VIT_11s0052g00450					VIT_07s0005g01210						VIT_02s0033g01210
			VIT_08s0007g03420					VIT_03s0180g00210					VIT_07s0197g00140						VIT_07s0151g00290
			VIT_08s0007g00900					VIT_17s0000g10260					VIT_17s0000g03820						VIT_14s0060g01490
			VIT_06s0004g03700					VIT_12s0059g00200					VIT_05s0077g01730						VIT_06s0061g01540
			VIT_01s0011g06580					VIT_02s0025g04520					VIT_02s0025g04010						VIT_14s0060g02440
			VIT_11s0016g00300					VIT_11s0016g02010					VIT_05s0020g00440						VIT_12s0059g02430
			VIT_08s0007g04800					VIT_05s0102g01200					VIT_13s0019g03680						VIT_15s0048g01490
			VIT_11s0149g00090					VIT_18s0001g15340					VIT_18s0001g08950						VIT_19s0015g02130
			VIT_14s0171g00180					VIT_10s0116g01540					VIT_16s0039g00940						VIT_08s0032g00840
			VIT_13s0067g00330					VIT_08s0040g00480					VIT_06s0004g08490						VIT_04s0008g01300
			VIT_01s0026g00880					VIT_11s0016g04960					VIT_08s0058g00150						VIT_09s0002g06560
			VIT_04s0044g00990					VIT_18s0001g06250					VIT_05s0020g03870						VIT_05s0062g01320
			VIT_12s0134g00240					VIT_14s0068g00210					VIT_08s0040g01470						VIT_08s0056g01190
			VIT_05s0049g01750					VIT_10s0003g03660					VIT_02s0025g01610						VIT_02s0025g00830
			VIT_13s0019g03050					VIT_01s0026g00270					VIT_18s0001g05250						VIT_08s0056g00870
			VIT_18s0001g06850					VIT_05s0062g00980					VIT_09s0002g02400						VIT_06s0004g05280
			VIT_18s0001g04790					VIT_15s0048g00550					VIT_18s0001g05060						VIT_18s0001g02300
			VIT_08s0007g04120					VIT_18s0001g05790					VIT_17s0119g00300						VIT_19s0027g00700
			VIT_18s0001g02230					VIT_09s0002g02680					VIT_05s0049g00930						VIT_15s0021g02240
			VIT_19s0015g02880					VIT_19s0090g01050					VIT_18s0001g14520						VIT_15s0046g03660
			VIT_15s0046g00480					VIT_11s0016g03650					VIT_05s0051g00230						VIT_18s0041g01850
			VIT_18s0089g01220					VIT_04s0008g06790					VIT_11s0016g01130						VIT_13s0320g00010
			VIT_14s0171g00140					VIT_01s0011g05870					VIT_12s0059g02360						VIT_17s0000g05260
			VIT_14s0060g01090					VIT_03s0063g00940					VIT_03s0017g01920						VIT_05s0062g01170
			VIT_02s0025g01730					VIT_05s0020g02530					VIT_07s0031g00630						VIT_17s0000g04050
			VIT_17s0000g05620					VIT_17s0053g00040					VIT_09s0002g06380						VIT_12s0028g02110
			VIT_09s0002g05320					VIT_18s0001g01650					VIT_13s0019g00710						VIT_04s0210g00180
			VIT_12s0028g02520					VIT_18s0076g00320					VIT_16s0013g01080						VIT_05s0020g03300
			VIT_05s0020g04670					VIT_04s0008g06980					VIT_01s0011g03950						VIT_05s0062g00900
			VIT_12s0034g02010					VIT_16s0039g00570					VIT_01s0010g00550						VIT_19s0085g01100
			VIT_12s0057g00140					VIT_06s0004g03870					VIT_05s0124g00330						VIT_13s0064g00410
			VIT_15s0046g01450					VIT_03s0088g00300					VIT_10s0003g00320						VIT_12s0059g00180
			VIT_18s0001g12690					VIT_17s0000g00460					VIT_10s0003g01880						VIT_01s0127g00070
			VIT_13s0019g04220					VIT_08s0040g00990					VIT_10s0003g03270						VIT_13s0047g00540
			VIT_17s0000g05110					VIT_06s0004g07390					VIT_15s0048g02560						VIT_02s0241g00040
			VIT_17s0000g08150					VIT_18s0089g01210					VIT_19s0014g05180						VIT_10s0042g00250
			VIT_08s0058g01270					VIT_18s0001g04930					VIT_14s0068g02080						VIT_11s0016g03040
			VIT_14s0108g00830					VIT_07s0005g00850					VIT_18s0122g00610						VIT_08s0040g01370
			VIT_02s0025g03540					VIT_03s0063g01290					VIT_16s0022g01970						VIT_07s0129g00280
			VIT_13s0047g00110					VIT_12s0035g00400					VIT_16s0022g02080						VIT_14s0006g00420
			VIT_08s0040g02590					VIT_09s0054g01750					VIT_06s0004g00570						VIT_18s0001g09160
			VIT_12s0059g01380					VIT_05s0049g01180					VIT_18s0089g00520						VIT_13s0156g00540
			VIT_05s0020g04880					VIT_18s0001g08250					VIT_12s0059g02350						VIT_04s0023g03260
			VIT_18s0001g02120					VIT_09s0054g00640					VIT_18s0072g00660						VIT_18s0001g14640
			VIT_01s0011g02960					VIT_14s0060g00950					VIT_11s0118g00230						VIT_14s0066g01150
			VIT_15s0046g01460					VIT_13s0067g02070					VIT_06s0009g00680						VIT_05s0049g00210
			VIT_03s0063g00180					VIT_03s0063g02050					VIT_19s0085g00560						VIT_07s0151g00830
			VIT_07s0005g06010					VIT_04s0023g01120					VIT_01s0011g04000						VIT_12s0035g01080
			VIT_14s0030g02310					VIT_04s0023g02810					VIT_11s0016g00870						VIT_19s0014g02310
			VIT_12s0028g01940					VIT_06s0004g00940					VIT_10s0003g01990						VIT_09s0054g01410
			VIT_13s0067g00110					VIT_05s0020g02200					VIT_17s0000g07140						VIT_09s0002g02990
			VIT_10s0116g00800					VIT_02s0012g01800					VIT_15s0024g01600						VIT_11s0016g02580
			VIT_02s0025g00820					VIT_11s0016g02350					VIT_06s0004g01740						VIT_15s0046g01510
			VIT_04s0023g02310					VIT_16s0039g02540					VIT_11s0016g02500						VIT_15s0045g00710
			VIT_14s0006g02320					VIT_01s0146g00340					VIT_07s0005g01320						VIT_15s0046g03080
			VIT_06s0004g07680					VIT_06s0080g00790					VIT_07s0031g02630						VIT_04s0044g01130
			VIT_15s0045g00040					VIT_05s0020g03190					VIT_01s0146g00490						VIT_17s0000g04460
			VIT_14s0066g01640					VIT_04s0008g06020					VIT_01s0146g00100						VIT_01s0010g03630
			VIT_08s0056g01290					VIT_08s0105g00420					VIT_04s0008g03050						VIT_01s0113g00560
			VIT_01s0026g02480					VIT_14s0006g01420					VIT_14s0006g01620						VIT_06s0009g00970
			VIT_11s0103g00190					VIT_13s0158g00340					VIT_07s0104g00220						VIT_05s0029g00410
			VIT_12s0055g00320					VIT_11s0016g03010					VIT_16s0039g00910						VIT_18s0001g05420
			VIT_01s0010g02460					VIT_17s0000g05530					VIT_06s0080g00570						VIT_11s0016g01370
			VIT_08s0007g02170					VIT_18s0001g14270					VIT_19s0090g00420						VIT_02s0154g00410
			VIT_02s0025g00550					VIT_09s0054g00520					VIT_07s0005g00170						VIT_11s0016g03030
			VIT_19s0014g00160					VIT_03s0097g00530											VIT_12s0035g01770
			VIT_01s0011g04220					VIT_08s0032g00860											VIT_06s0004g04170
			VIT_18s0041g00670					VIT_11s0016g00280											VIT_07s0129g00570
			VIT_14s0108g00840					VIT_17s0000g04860											VIT_09s0002g07220
			VIT_17s0000g06630					VIT_03s0038g01130											VIT_05s0077g02120
			VIT_10s0405g00040					VIT_09s0002g01090											VIT_19s0014g00170
			VIT_15s0048g02490					VIT_05s0124g00190											VIT_17s0000g01950
			VIT_01s0011g04290					VIT_15s0046g02300											VIT_06s0004g02740
			VIT_14s0083g01100					VIT_01s0150g00320											VIT_05s0049g02090
			VIT_10s0116g01670					VIT_01s0127g00060											VIT_17s0000g04150
			VIT_02s0025g02730					VIT_03s0063g00680											VIT_10s0071g00840
			VIT_10s0003g01040					VIT_02s0025g00120											VIT_02s0025g03520
			VIT_12s0059g00670					VIT_06s0004g05800											VIT_18s0001g12490
			VIT_07s0255g00110					VIT_17s0000g07720											VIT_15s0046g01060
			VIT_06s0004g04370					VIT_10s0003g00630											VIT_05s0051g00850
			VIT_05s0020g04220					VIT_09s0002g04660											VIT_04s0044g01020
			VIT_09s0002g00640					VIT_01s0011g06070											VIT_04s0008g02180
			VIT_06s0004g00620					VIT_08s0007g07850											VIT_02s0012g01210
			VIT_19s0085g00740					VIT_03s0063g00730											VIT_05s0020g01530
			VIT_05s0094g00990					VIT_08s0007g07780											VIT_16s0022g01390
			VIT_14s0030g01790					VIT_18s0001g08370											VIT_15s0046g02110
			VIT_09s0054g00430					VIT_18s0001g15730											VIT_07s0005g03490
			VIT_04s0008g06390					VIT_05s0077g00610											VIT_10s0003g03250
			VIT_12s0057g01070					VIT_17s0053g00210											VIT_18s0001g00510
			VIT_09s0002g07530					VIT_15s0021g00530											VIT_17s0000g08580
			VIT_05s0051g00010					VIT_13s0019g00480											VIT_02s0025g03590
			VIT_11s0016g03250					VIT_15s0046g00220											VIT_03s0097g00520
			VIT_04s0008g05830					VIT_03s0088g01220											VIT_01s0011g04160
			VIT_12s0034g01870					VIT_06s0004g04530											VIT_12s0028g00930
			VIT_17s0000g02440					VIT_01s0011g01050											VIT_14s0128g00680
			VIT_12s0057g01020					VIT_05s0029g00420											VIT_07s0130g00210
			VIT_17s0000g04340					VIT_14s0108g00050											VIT_02s0025g03290
			VIT_16s0050g02680					VIT_07s0005g02080											VIT_18s0001g13500
			VIT_07s0129g00300					VIT_19s0090g00820											VIT_06s0009g03200
			VIT_15s0046g00290					VIT_04s0008g06310											VIT_12s0057g01200
			VIT_06s0009g00980					VIT_11s0016g05480											VIT_19s0015g00340
			VIT_13s0019g02130					VIT_18s0001g12520											VIT_14s0030g02050
			VIT_06s0004g06790					VIT_19s0014g03670											VIT_12s0028g00450
			VIT_18s0001g00820					VIT_01s0010g01570											VIT_18s0122g00080
			VIT_18s0041g00350					VIT_05s0062g00960											VIT_02s0025g01710
			VIT_01s0026g01950					VIT_18s0001g09690											VIT_08s0040g01270
			VIT_01s0010g03870					VIT_01s0011g06270											VIT_03s0017g02360
			VIT_18s0001g14660					VIT_01s0010g02450											VIT_13s0019g00240
			VIT_16s0039g00760					VIT_06s0004g00710											VIT_15s0024g00660
			VIT_12s0028g01080					VIT_11s0016g01710											VIT_14s0108g01020
			VIT_17s0000g09790					VIT_15s0046g01640											VIT_16s0039g00280
			VIT_14s0066g01010					VIT_01s0146g00480											VIT_08s0007g07270
			VIT_14s0068g01200					VIT_19s0090g00480											VIT_18s0001g08040
			VIT_08s0007g06420					VIT_15s0107g00550											VIT_17s0000g08850
			VIT_15s0048g00680					VIT_03s0063g01970											VIT_06s0061g01230
			VIT_04s0023g02610					VIT_01s0026g01430											VIT_13s0019g02890
			VIT_06s0004g02710					VIT_11s0016g00380											VIT_14s0108g01510
			VIT_03s0063g02040					VIT_12s0035g01050											VIT_12s0059g00750
			VIT_06s0004g06090					VIT_18s0001g07500											VIT_07s0031g01600
			VIT_06s0009g01320					VIT_18s0001g14580											VIT_19s0015g01850
			VIT_03s0091g01090					VIT_14s0060g01530											VIT_02s0025g02370
			VIT_02s0025g00280					VIT_07s0005g00990											ENSRNA049996124
			VIT_07s0005g05960					VIT_05s0029g00310											VIT_01s0011g00350
			VIT_12s0059g00430					VIT_03s0063g01870											VIT_14s0083g00530
			VIT_09s0002g02230					VIT_16s0022g01810											VIT_03s0038g03180
			VIT_18s0001g06180					VIT_18s0089g01330											VIT_09s0002g01040
			VIT_16s0098g00860					VIT_02s0012g00240											VIT_12s0034g02470
			VIT_13s0074g00730					VIT_14s0060g00850											VIT_03s0038g04030
			VIT_16s0022g02170					VIT_11s0016g05510											VIT_18s0001g08030
			VIT_05s0049g00150					VIT_17s0000g10420											VIT_07s0031g01500
			VIT_06s0009g02840					VIT_09s0018g01270											VIT_08s0056g01710
			VIT_05s0049g00760					VIT_10s0003g02210											VIT_10s0597g00010
			VIT_15s0021g00270					VIT_15s0046g00440											VIT_15s0048g00170
			VIT_14s0030g01540					VIT_17s0000g05820											VIT_08s0007g04990
			VIT_14s0083g01030					VIT_13s0064g00980											VIT_04s0069g00780
			VIT_12s0028g03450					VIT_19s0014g02390											VIT_14s0030g01220
			VIT_02s0154g00070					VIT_18s0001g01660											VIT_09s0002g04930
			VIT_07s0005g01680					VIT_06s0080g00030											VIT_04s0008g05530
			VIT_08s0056g01240					VIT_03s0017g01660											VIT_08s0007g01740
			VIT_03s0091g00260					VIT_18s0001g01960											VIT_19s0085g00440
			VIT_01s0010g03620					VIT_15s0048g01350											VIT_09s0002g02360
			VIT_02s0025g03320					VIT_12s0035g02010											VIT_18s0089g00920
			VIT_01s0011g03520					VIT_07s0005g03420											VIT_02s0087g00780
			VIT_14s0030g00250					VIT_07s0005g03680											VIT_13s0073g00180
			VIT_17s0000g03940					VIT_13s0019g02360											VIT_17s0000g01150
			VIT_07s0005g04110					VIT_08s0007g01510											VIT_01s0011g02950
			VIT_04s0008g04460					VIT_09s0002g02130											VIT_07s0129g00890
			VIT_18s0001g09400					VIT_02s0025g05100											VIT_18s0001g09140
			VIT_17s0000g04480					VIT_10s0003g04100											VIT_15s0048g02420
			VIT_11s0052g01140					VIT_04s0044g01570											VIT_12s0028g01150
			VIT_13s0019g02180					VIT_19s0014g04420											VIT_04s0044g00860
			VIT_01s0026g00980					VIT_19s0090g00990											VIT_16s0098g00720
			VIT_07s0005g05510					VIT_17s0000g08910											VIT_09s0002g07110
			VIT_05s0062g00250					VIT_18s0122g00950											VIT_06s0004g06530
			VIT_14s0060g02730					VIT_13s0067g01360											VIT_03s0038g04480
			VIT_06s0004g02690					VIT_01s0026g01050											VIT_14s0108g01190
			VIT_10s0003g03810					VIT_06s0004g03450											VIT_08s0056g01570
			VIT_14s0006g02880					VIT_07s0031g00050											VIT_05s0020g00450
			VIT_02s0241g00050					VIT_05s0020g02330											VIT_16s0013g00990
			VIT_09s0002g02970					VIT_03s0038g03410											VIT_17s0000g04910
			VIT_16s0098g01280					VIT_19s0015g01740											VIT_12s0035g00380
			VIT_02s0033g01000					VIT_08s0007g02970											VIT_13s0019g05400
			VIT_08s0058g01000					VIT_09s0002g02430											VIT_03s0063g00810
			VIT_02s0087g00630					VIT_10s0003g01370											VIT_09s0002g06490
			VIT_19s0015g00050					VIT_12s0028g02420											VIT_19s0085g01010
			VIT_09s0002g00330					VIT_14s0108g01530											VIT_07s0104g01550
			VIT_10s0003g01100					VIT_02s0154g00110											VIT_12s0059g00530
			VIT_02s0012g00500					VIT_05s0062g00990											VIT_18s0001g11260
			VIT_05s0049g00040					VIT_19s0014g01580											VIT_05s0094g01430
			VIT_01s0011g05850					VIT_01s0026g02290											VIT_05s0077g00170
			VIT_16s0022g00510					VIT_18s0001g07260											VIT_14s0066g01590
			VIT_16s0098g01250					VIT_17s0000g01170											VIT_12s0028g01120
			VIT_13s0019g03120					VIT_14s0083g01020											VIT_11s0016g05130
			VIT_04s0023g00580					VIT_16s0039g01560											VIT_01s0026g02710
			VIT_05s0029g00080					VIT_18s0001g11900											VIT_01s0011g01420
			VIT_18s0001g06890					VIT_19s0027g00090											VIT_19s0090g00360
			VIT_18s0001g00280					VIT_17s0000g04160											VIT_08s0040g00200
			VIT_07s0031g02340					VIT_03s0038g00940											VIT_06s0004g01380
			VIT_01s0011g04820					VIT_13s0074g00580											VIT_02s0025g04350
			VIT_04s0008g01580					VIT_16s0050g02510											VIT_15s0046g00120
			VIT_15s0048g00330					VIT_12s0034g01090											VIT_04s0008g04230
			VIT_12s0028g00040					VIT_16s0013g01500											VIT_04s0008g00230
			VIT_08s0007g00320					VIT_07s0031g02560											VIT_08s0105g00310
			VIT_14s0171g00400					VIT_11s0016g01480											VIT_08s0217g00100
			VIT_07s0031g00500					VIT_09s0002g06880											VIT_10s0116g01710
			VIT_03s0038g02050					VIT_08s0007g08250											VIT_07s0005g02020
			VIT_19s0090g00590					VIT_14s0006g01030											VIT_18s0001g05380
			VIT_01s0011g04240					VIT_19s0090g00660											VIT_18s0001g07240
			VIT_18s0001g10540					VIT_05s0020g02130											VIT_01s0011g04900
			VIT_14s0060g00450					VIT_07s0031g02780											VIT_16s0022g01280
			VIT_11s0016g04560					VIT_06s0004g03210											VIT_06s0004g03000
			VIT_08s0056g01480					VIT_01s0011g01890											VIT_06s0004g01840
			VIT_03s0038g00670					VIT_10s0003g00150											VIT_08s0056g00200
			VIT_02s0012g00090					VIT_18s0072g00080											VIT_06s0004g02400
			VIT_12s0134g00170					VIT_05s0094g01230											VIT_11s0149g00050
			VIT_06s0004g01550					VIT_05s0102g00240											VIT_04s0008g04500
			VIT_17s0000g06880					VIT_11s0078g00180											VIT_05s0102g01150
			VIT_04s0044g00880					VIT_04s0008g05470											VIT_10s0003g02810
			VIT_12s0059g00370					VIT_18s0001g13250											VIT_11s0016g01770
			VIT_04s0023g03110					VIT_03s0038g03740											VIT_02s0012g00320
			VIT_19s0090g01280					VIT_18s0001g11820											VIT_12s0059g02020
			VIT_06s0004g06830					VIT_10s0003g00970											VIT_14s0006g01080
			VIT_18s0001g15410					VIT_15s0046g02380											VIT_16s0013g00650
			VIT_18s0001g13230					VIT_17s0000g06010											VIT_06s0004g07800
			VIT_07s0129g01000					VIT_04s0079g00230											VIT_01s0010g02480
			VIT_13s0019g01200					VIT_10s0116g01550											VIT_02s0025g01180
			VIT_02s0025g04300					VIT_05s0062g01020											VIT_17s0000g00840
			VIT_08s0007g00690					VIT_01s0010g00760											VIT_16s0100g00160
			VIT_11s0037g00530					VIT_19s0027g00740											VIT_01s0026g00170
			VIT_04s0008g01570					VIT_02s0025g00200											VIT_14s0068g00420
			VIT_01s0011g03070					VIT_13s0067g00390											VIT_07s0005g01180
			VIT_13s0320g00060					VIT_13s0019g01810											VIT_12s0057g01550
			VIT_10s0116g00780					VIT_11s0016g01330											VIT_07s0005g04510
			VIT_05s0020g00330					VIT_19s0090g01270											VIT_16s0022g00760
			VIT_14s0083g00080					VIT_05s0020g01080											VIT_06s0061g00180
			VIT_19s0014g03850					VIT_07s0031g02180											VIT_08s0040g02100
			VIT_02s0025g00500					VIT_19s0085g00050											VIT_12s0059g00400
			VIT_03s0038g04100					VIT_08s0040g02660											VIT_13s0139g00310
			VIT_15s0048g00370					VIT_12s0028g03260											VIT_18s0001g09340
			VIT_08s0058g01010					VIT_14s0108g01350											VIT_17s0000g08770
			VIT_14s0108g00740					VIT_16s0022g01290											VIT_16s0100g01210
			VIT_14s0081g00060					VIT_16s0039g02530											VIT_06s0061g01350
			VIT_03s0038g01110					VIT_13s0019g02080											VIT_12s0055g00370
			VIT_12s0028g03050					VIT_10s0042g00840											VIT_12s0059g00640
			VIT_02s0033g00290					VIT_18s0041g01940											VIT_13s0067g00810
			VIT_09s0002g01170					VIT_14s0036g00420											VIT_02s0012g01170
			VIT_08s0056g00140					VIT_18s0001g06410											VIT_06s0004g06070
			VIT_09s0018g00520					VIT_06s0080g00470											VIT_14s0030g01700
			VIT_18s0001g06030					VIT_14s0108g01080											VIT_05s0020g04860
			VIT_05s0020g02170					VIT_13s0047g01230											VIT_06s0004g03600
			VIT_14s0060g00330					VIT_19s0015g01310											VIT_12s0057g00170
			VIT_08s0007g04570					VIT_18s0001g12910											VIT_10s0003g04090
			VIT_18s0001g14360					VIT_06s0004g01750											VIT_02s0025g02830
			VIT_12s0059g02480					VIT_07s0005g03030											VIT_10s0003g02060
			VIT_16s0098g01900					VIT_04s0008g04530											VIT_18s0001g00360
			VIT_11s0016g04080					VIT_16s0039g02750											VIT_17s0000g06200
			VIT_05s0020g03360					VIT_08s0007g01340											VIT_13s0074g00370
			VIT_02s0025g01280					VIT_06s0004g07090											VIT_10s0003g01600
			VIT_02s0025g04910					VIT_11s0016g01190											VIT_02s0033g00180
			VIT_14s0036g00820					VIT_01s0011g03910											VIT_01s0011g05670
			VIT_11s0118g00370					VIT_04s0008g06970											VIT_01s0011g04810
			VIT_07s0129g00110					VIT_18s0001g02340											VIT_07s0005g05010
			VIT_07s0141g00330					VIT_14s0006g02820											VIT_19s0014g03520
			VIT_05s0020g03330					VIT_17s0000g00090											VIT_10s0116g01810
			VIT_08s0007g07390					VIT_03s0088g00370											VIT_02s0025g00380
			VIT_08s0040g03150					VIT_03s0017g01410											VIT_16s0050g02320
			VIT_05s0062g01190					VIT_13s0067g03530											VIT_19s0093g00310
			VIT_14s0108g00590					VIT_08s0058g00860											VIT_15s0046g02370
			VIT_13s0067g01980					VIT_17s0000g07980											VIT_03s0088g00280
			VIT_01s0026g00350					VIT_14s0036g00630											VIT_11s0016g03500
			VIT_18s0001g08870					VIT_08s0007g02030											VIT_17s0000g02950
			VIT_06s0004g06430					VIT_14s0128g00330											VIT_04s0023g03010
			VIT_06s0004g07490					VIT_10s0092g00570											VIT_13s0158g00120
			VIT_16s0050g01150					VIT_14s0068g01690											VIT_03s0091g00360
			VIT_10s0003g02540					VIT_01s0011g02480											VIT_18s0001g12070
			VIT_17s0000g04130					VIT_02s0025g03220											VIT_16s0115g00070
			VIT_09s0002g03140					VIT_13s0064g01030											VIT_05s0020g02340
			VIT_14s0006g02510					VIT_12s0057g00980											VIT_06s0004g07250
			VIT_18s0001g11370					VIT_17s0000g01530											VIT_05s0077g00660
			VIT_02s0025g04310					VIT_18s0001g11620											VIT_12s0059g00810
			VIT_12s0057g00090					VIT_05s0029g00390											VIT_15s0024g01620
			VIT_17s0000g01290					VIT_11s0118g00570											VIT_13s0019g04610
			VIT_06s0004g07880					VIT_01s0011g04860											VIT_01s0150g00430
			VIT_10s0003g03310					VIT_07s0031g01300											VIT_12s0057g00220
			VIT_10s0116g01780					VIT_10s0003g03650											VIT_08s0040g00470
			VIT_07s0031g02900					VIT_17s0000g07450											VIT_12s0028g01970
			VIT_05s0020g02480					VIT_04s0023g02420											VIT_07s0104g00440
			VIT_07s0005g02060					VIT_17s0000g06750											VIT_01s0011g05300
			VIT_04s0023g00720					VIT_15s0024g00980											VIT_03s0017g02170
			VIT_16s0039g01910					VIT_06s0004g06880											VIT_10s0003g03170
			VIT_08s0040g01950					VIT_19s0014g02870											VIT_01s0026g01490
			VIT_07s0031g00450					VIT_07s0151g00280											VIT_18s0001g13220
			VIT_08s0032g01110					VIT_18s0001g03290											VIT_05s0020g04010
			VIT_11s0016g01880					VIT_08s0040g01230											VIT_18s0001g07200
			VIT_12s0028g04000					VIT_14s0066g02510											VIT_04s0210g00120
			VIT_01s0127g00680					VIT_10s0092g00640											VIT_14s0128g00760
			VIT_18s0072g00820					VIT_10s0116g00820											VIT_12s0059g00110
			VIT_01s0137g00720					VIT_18s0117g00140											VIT_06s0004g03460
			VIT_05s0049g00010					VIT_15s0046g02570											VIT_02s0012g00740
			VIT_07s0104g01390					VIT_14s0066g00820											VIT_01s0011g06050
			VIT_07s0104g00180					VIT_06s0004g00410											VIT_12s0035g01150
			VIT_11s0016g02920					VIT_18s0072g00370											VIT_06s0004g04990
			VIT_05s0029g00480					VIT_06s0004g04570											VIT_01s0010g03900
			VIT_05s0020g03650					VIT_17s0000g06280											VIT_10s0003g00420
			VIT_07s0005g00750					VIT_06s0004g03830											VIT_15s0021g02720
			VIT_13s0067g01450					VIT_07s0005g06640											VIT_18s0117g00130
			VIT_06s0004g03400					VIT_13s0067g03400											VIT_14s0060g00860
			VIT_12s0055g00930					VIT_18s0122g01290											VIT_19s0014g02640
			VIT_12s0059g00140					VIT_11s0052g00320											VIT_09s0002g02490
			VIT_17s0000g06190					VIT_03s0063g01780											VIT_07s0031g02140
			VIT_02s0025g01430					VIT_14s0171g00490											VIT_11s0037g00130
			VIT_04s0023g00410					VIT_14s0066g02610											VIT_06s0004g01640
			VIT_03s0091g00420					VIT_19s0015g00110											VIT_10s0003g00990
			VIT_02s0109g00250					VIT_06s0004g05090											VIT_11s0016g04040
			VIT_12s0059g00080					VIT_08s0007g05010											VIT_16s0100g00900
			VIT_03s0038g03980					VIT_03s0038g04510											VIT_07s0104g00540
			VIT_14s0006g02970					VIT_17s0000g01970											VIT_17s0000g07290
			VIT_04s0008g00220					VIT_13s0019g00040											VIT_08s0007g04780
			VIT_16s0098g01720					VIT_11s0016g00720											VIT_08s0056g00100
			VIT_08s0032g00470					VIT_06s0004g07500											VIT_05s0049g02310
			VIT_01s0011g04780					VIT_06s0004g03630											VIT_07s0005g02600
			VIT_09s0002g04780					VIT_14s0060g00270											VIT_06s0004g02950
			VIT_17s0053g00710					VIT_18s0001g11480											VIT_05s0049g00200
			VIT_12s0134g00140					VIT_03s0038g04180											VIT_08s0217g00030
			VIT_01s0026g00290					VIT_15s0046g02480											VIT_01s0026g02630
			VIT_03s0038g04620					VIT_14s0006g01400											VIT_04s0043g01010
			VIT_16s0022g02200					VIT_02s0234g00110											VIT_14s0068g02070
			VIT_18s0157g00170					VIT_03s0038g02330											VIT_13s0019g01610
			VIT_13s0106g00250					VIT_12s0028g02210											VIT_09s0002g00810
			VIT_04s0008g05110					VIT_04s0008g05600											VIT_05s0102g01120
			VIT_06s0004g05740					VIT_04s0023g02120											VIT_06s0004g04460
			VIT_08s0058g00410					VIT_06s0061g00240											VIT_07s0031g00660
			VIT_07s0104g00890					VIT_02s0025g04330											VIT_18s0072g01040
			VIT_01s0026g00260					VIT_11s0065g00150											VIT_13s0019g00460
			VIT_01s0127g00850					VIT_16s0098g00760											VIT_06s0009g03170
			VIT_16s0050g00480					VIT_15s0048g02270											VIT_11s0016g03270
			VIT_11s0016g00930					VIT_04s0008g05450											VIT_18s0122g01140
			VIT_01s0026g01690					VIT_14s0006g00350											VIT_10s0003g03950
			VIT_18s0001g09870					VIT_14s0060g01460											VIT_09s0054g01870
			VIT_17s0000g01700					VIT_14s0066g02360											VIT_15s0046g01430
			VIT_09s0002g08090					VIT_08s0007g00930											VIT_12s0034g01860
			VIT_02s0025g02190					VIT_08s0040g01030											VIT_05s0020g04760
			VIT_12s0034g00030					VIT_17s0000g03420											VIT_04s0008g00720
			VIT_02s0012g01120					VIT_02s0025g02760											VIT_16s0100g01170
			VIT_18s0001g10550					VIT_01s0011g01780											VIT_09s0002g08290
			VIT_09s0018g01870					VIT_08s0007g03110											VIT_04s0008g04220
			VIT_08s0007g05030					VIT_05s0020g01980											VIT_18s0122g00770
			VIT_09s0018g01670					VIT_12s0028g03270											VIT_17s0000g04970
			VIT_10s0042g00820					VIT_15s0046g02830											VIT_01s0011g02880
			VIT_02s0012g02030																VIT_07s0005g03740
			VIT_05s0049g01830																VIT_05s0049g00790
			VIT_12s0059g00050																VIT_13s0019g00260
			VIT_02s0033g01410																VIT_08s0007g08170
			VIT_10s0003g01560																VIT_13s0158g00400
			VIT_04s0044g00310																VIT_06s0009g00770
			VIT_06s0009g03420																VIT_08s0007g04520
			VIT_10s0003g01980																VIT_08s0040g01920
			VIT_11s0016g01020																VIT_17s0000g07820
			VIT_15s0048g02250																VIT_09s0002g08540
			VIT_03s0038g04760																VIT_11s0016g02360
			VIT_08s0040g01190																VIT_16s0022g01740
			VIT_17s0000g06210																VIT_19s0014g03370
			VIT_12s0028g03350																VIT_14s0006g02480
			VIT_14s0068g02190																VIT_06s0004g03810
			VIT_11s0016g03350																VIT_08s0040g00510
			VIT_01s0127g00470																VIT_01s0026g01540
			VIT_12s0028g00320																VIT_14s0066g01790
			VIT_04s0023g01910																VIT_12s0059g00570
			VIT_06s0009g03740																VIT_08s0040g02430
			VIT_16s0098g01520																VIT_05s0051g00410
			VIT_18s0122g00330																VIT_17s0000g02430
			VIT_13s0067g02630																VIT_06s0004g07110
			VIT_01s0127g00870																VIT_06s0080g00390
			VIT_06s0061g00550																VIT_03s0038g03170
			VIT_18s0001g06360																VIT_17s0000g00040
			VIT_13s0064g01110																VIT_04s0008g00850
			VIT_14s0068g00510																VIT_16s0050g02340
			VIT_10s0003g02890																VIT_12s0034g01370
			VIT_09s0002g08960																VIT_16s0098g01150
			VIT_01s0011g06010																VIT_04s0069g01010
			VIT_14s0030g00020																VIT_06s0004g07340
			VIT_14s0066g01840																VIT_06s0080g00680
			VIT_12s0034g01930																VIT_01s0011g03930
			VIT_05s0020g04850																VIT_08s0007g08200
			VIT_07s0031g00590																VIT_06s0004g01870
			VIT_18s0072g01110																VIT_09s0054g01760
			VIT_14s0128g00080																VIT_07s0129g00510
			VIT_04s0044g01490																VIT_13s0067g02870
			VIT_11s0016g01450																VIT_18s0122g00110
			VIT_08s0007g06030																VIT_11s0065g00860
			VIT_18s0122g00830																VIT_19s0014g00980
			VIT_11s0052g01650																VIT_08s0007g07970
			VIT_04s0023g01110																VIT_06s0004g05490
			VIT_14s0060g01780																VIT_10s0042g00960
			VIT_14s0030g00870																VIT_01s0011g05610
			VIT_10s0003g01410																VIT_19s0015g01600
			VIT_06s0004g00720																VIT_08s0007g03800
			VIT_17s0000g06350																VIT_02s0025g03010
			VIT_10s0116g01880																VIT_17s0000g01800
			VIT_07s0031g01680																VIT_18s0001g11140
			VIT_18s0001g07340																VIT_14s0030g01800
			VIT_12s0055g00020																VIT_08s0007g04170
			VIT_01s0011g05290																VIT_03s0091g00870
			VIT_06s0004g05330																VIT_13s0158g00180
			VIT_06s0004g08230																VIT_15s0048g01790
			VIT_07s0129g00380																VIT_16s0039g01280
			VIT_09s0054g00820																VIT_04s0044g01260
			VIT_04s0069g00860																VIT_05s0029g00720
			VIT_18s0001g05370																VIT_04s0044g01850
			VIT_02s0025g00180																VIT_04s0008g01130
			VIT_09s0002g07140																VIT_04s0008g03810
			VIT_05s0020g04280																VIT_07s0197g00250
			VIT_13s0156g00100																VIT_14s0006g01840
			VIT_10s0003g02900																VIT_05s0077g00950
			VIT_04s0008g01850																VIT_19s0090g01790
			VIT_08s0058g00650																VIT_05s0020g03310
			VIT_12s0034g01970																VIT_16s0039g01410
			VIT_18s0001g05040																VIT_14s0030g00830
			VIT_16s0039g00860																VIT_13s0067g01950
			VIT_15s0021g02700																VIT_11s0016g04390
			VIT_18s0072g00920																VIT_09s0002g02690
			VIT_04s0044g01410																VIT_14s0066g02140
			VIT_04s0023g01600																VIT_06s0061g00410
			VIT_13s0019g01040																VIT_06s0004g07760
			VIT_08s0007g01470																VIT_19s0090g01780
			VIT_02s0087g00400																VIT_07s0151g00610
			VIT_09s0002g05590																VIT_14s0036g00330
			VIT_12s0055g00050																VIT_07s0005g01750
			VIT_09s0002g04840																VIT_01s0010g01180
			VIT_19s0015g02090																VIT_14s0171g00510
			VIT_17s0000g10090																VIT_18s0001g05600
			VIT_18s0001g09040																VIT_19s0177g00210
			VIT_18s0041g00580																VIT_09s0054g01690
			VIT_18s0001g06840																VIT_19s0014g03090
			VIT_05s0062g01100																VIT_13s0084g00050
			VIT_07s0005g00830																VIT_05s0029g00330
			VIT_13s0064g01760																VIT_08s0056g00710
			VIT_11s0052g01200																VIT_01s0011g04140
			VIT_01s0010g03530																VIT_01s0150g00160
			VIT_11s0016g05230																VIT_07s0031g02810
			VIT_12s0059g01320																VIT_07s0031g01660
			VIT_08s0040g00800																VIT_14s0060g00090
			VIT_13s0084g00240																VIT_06s0009g02370
			VIT_14s0068g01160																VIT_18s0001g06120
			VIT_03s0063g01240																VIT_08s0007g00780
			VIT_04s0044g00160																VIT_17s0000g01670
			VIT_16s0098g00800																VIT_18s0122g01270
			VIT_06s0009g01070																VIT_07s0005g03810
			VIT_07s0129g00560																VIT_10s0071g00810
			VIT_19s0014g00450																VIT_04s0044g01940
			VIT_15s0046g00040																VIT_14s0066g01450
			VIT_08s0007g05810																VIT_05s0077g01450
			VIT_16s0050g00080																VIT_08s0040g03050
			VIT_17s0053g00590																VIT_01s0011g04450
			VIT_03s0038g02800																VIT_05s0094g01150
			VIT_01s0010g01260																VIT_18s0164g00030
			VIT_01s0011g06560																VIT_18s0001g11080
			VIT_17s0000g08530																VIT_05s0049g01400
			VIT_14s0060g00680																VIT_11s0016g02400
			VIT_19s0027g01890																VIT_13s0067g02650
			VIT_10s0003g02450																VIT_14s0068g01700
			VIT_01s0010g02740																VIT_06s0009g03430
			VIT_18s0001g07930																VIT_14s0006g02720
			VIT_03s0180g00140																VIT_12s0028g02370
			VIT_10s0003g04560																VIT_12s0028g03310
			VIT_02s0012g01660																VIT_19s0177g00240
			VIT_03s0088g00700																VIT_10s0003g00540
			VIT_15s0021g00880																VIT_19s0014g01210
			VIT_06s0004g01390																VIT_16s0050g01430
			VIT_13s0064g00670																VIT_06s0080g01000
			VIT_08s0007g06670																VIT_15s0046g00280
			VIT_10s0003g02000																VIT_11s0016g02720
			VIT_08s0007g01690																VIT_13s0019g02170
			VIT_18s0122g01440																VIT_13s0019g04300
			VIT_04s0023g02240																VIT_04s0069g00930
			VIT_18s0001g08550																VIT_15s0024g00650
			VIT_05s0020g03380																VIT_01s0011g00930
			VIT_11s0052g01250																VIT_08s0007g01560
			VIT_04s0008g01100																VIT_18s0001g15270
			VIT_11s0052g01280																VIT_11s0118g00240
			VIT_11s0016g00730																VIT_14s0068g00850
			VIT_08s0007g06040																VIT_14s0108g00750
			VIT_01s0146g00070																VIT_09s0002g04130
			VIT_01s0010g02430																VIT_16s0050g01900
			VIT_05s0062g00240																VIT_03s0063g00820
			VIT_17s0000g01280																VIT_13s0067g03820
			VIT_16s0013g00630																VIT_04s0008g03730
			VIT_04s0008g05640																VIT_06s0009g01740
			VIT_06s0004g05320																VIT_06s0061g01070
			VIT_18s0001g06220																VIT_10s0003g01710
			VIT_18s0001g13960																VIT_11s0118g00550
			VIT_01s0026g00860																VIT_18s0001g06090
			VIT_04s0008g01730																VIT_14s0030g00640
			VIT_01s0011g05500																VIT_11s0016g01290
			VIT_09s0002g03460																VIT_07s0205g00010
			VIT_13s0320g00070																VIT_09s0002g06770
			VIT_14s0171g00100																VIT_15s0046g02130
			VIT_09s0002g02320																VIT_03s0091g00480
			VIT_14s0030g01170																VIT_11s0118g00590
			VIT_02s0025g02790																VIT_15s0021g00520
			VIT_04s0023g00430																VIT_04s0044g00010
			VIT_18s0001g10160																VIT_14s0068g00640
			VIT_15s0045g00330																VIT_14s0006g03250
			VIT_16s0100g00750																VIT_02s0154g00590
			VIT_06s0004g06820																VIT_15s0024g00040
			VIT_11s0016g01400																VIT_01s0127g00130
			VIT_02s0025g02840																VIT_04s0023g03320
			VIT_05s0077g02260																VIT_09s0002g04330
			VIT_19s0014g05130																VIT_13s0019g04600
			VIT_09s0002g03690																VIT_02s0087g00410
			VIT_05s0051g00640																VIT_18s0001g14230
			VIT_07s0005g02120																VIT_15s0048g01040
			VIT_19s0014g01690																VIT_04s0043g00360
			VIT_11s0052g00820																VIT_08s0056g01310
			VIT_13s0067g01070																VIT_17s0000g07350
			VIT_13s0158g00130																VIT_04s0008g05820
			VIT_06s0004g04030																VIT_05s0029g00680
			VIT_14s0060g01940																VIT_17s0000g04370
			VIT_14s0083g01150																VIT_15s0046g02220
			VIT_14s0030g00660																VIT_12s0059g01090
			VIT_02s0033g00260																VIT_16s0098g00690
			VIT_08s0056g01000																VIT_05s0020g03680
			VIT_13s0067g01200																VIT_10s0003g04940
			VIT_12s0034g02530																VIT_01s0010g02870
			VIT_19s0014g03660																VIT_06s0061g00350
			VIT_18s0001g05950																VIT_08s0007g04390
			VIT_06s0061g01380																VIT_08s0007g06760
			VIT_04s0008g07110																VIT_13s0019g02730
			VIT_02s0025g01240																VIT_11s0149g00220
			VIT_02s0025g03780																VIT_19s0015g02380
			VIT_13s0019g00740																VIT_03s0017g01350
			VIT_19s0090g00830																VIT_13s0019g04710
			VIT_17s0000g01790																VIT_07s0191g00230
			VIT_18s0001g05300																VIT_13s0064g00290
			VIT_19s0014g02880																VIT_11s0016g01150
			VIT_12s0035g00650																VIT_02s0012g01340
			VIT_04s0023g03230																VIT_12s0028g01550
			VIT_14s0060g01870																VIT_01s0011g02070
			VIT_02s0025g02020																VIT_15s0046g00240
			VIT_08s0040g02900																VIT_18s0001g08750
			VIT_11s0016g02410																VIT_05s0102g01180
			VIT_19s0090g01360																VIT_07s0031g02720
			VIT_02s0033g01060																VIT_05s0077g01550
			VIT_01s0011g05950																VIT_01s0146g00460
			VIT_02s0012g02190																VIT_01s0010g00740
			VIT_15s0021g01880																VIT_06s0061g00830
			VIT_06s0080g00780																VIT_12s0059g01160
			VIT_14s0066g00870																VIT_12s0059g00100
			VIT_10s0116g00410																VIT_12s0035g02150
			VIT_18s0001g13400																VIT_08s0040g03060
			VIT_06s0004g00910																VIT_19s0090g01650
			VIT_12s0028g01390																VIT_13s0156g00330
			VIT_02s0025g04730																VIT_01s0010g03860
			VIT_18s0001g00760																VIT_14s0081g00690
			VIT_18s0117g00100																VIT_08s0007g07560
			VIT_07s0005g04850																VIT_19s0014g00930
			VIT_02s0025g02080																VIT_09s0002g01100
			VIT_17s0000g06370																VIT_03s0038g02010
			VIT_01s0011g06470																VIT_11s0016g02490
			VIT_14s0068g02240																VIT_18s0041g00560
			VIT_19s0014g00460																VIT_08s0007g03160
			VIT_04s0069g00790																VIT_10s0003g00230
			VIT_13s0019g00890																VIT_14s0081g00190
			VIT_08s0058g00430																VIT_03s0038g02390
			VIT_01s0026g02270																VIT_04s0008g02390
			VIT_05s0020g01640																VIT_11s0016g04360
			VIT_18s0122g00290																VIT_15s0048g02460
			VIT_16s0100g00230																VIT_12s0034g00950
			VIT_08s0058g00120																VIT_01s0011g01290
			VIT_14s0060g01850																VIT_18s0001g10670
			VIT_06s0004g06130																VIT_03s0063g00150
			VIT_10s0003g04540																VIT_19s0014g02250
			VIT_01s0010g02030																VIT_16s0100g01300
			VIT_06s0061g00330																VIT_13s0067g02960
			VIT_18s0001g07410																VIT_07s0104g01420
			VIT_10s0003g04990																VIT_03s0180g00080
			VIT_08s0007g00410																VIT_01s0026g00900
			VIT_05s0077g00560																VIT_06s0061g00440
			VIT_11s0016g00290																VIT_08s0058g00990
			VIT_12s0121g00230																VIT_06s0004g00890
			VIT_09s0002g00540																VIT_05s0020g04440
			VIT_04s0008g01910																VIT_03s0132g00100
			VIT_08s0040g02350																VIT_12s0059g02520
			VIT_12s0028g04030																VIT_15s0048g01850
			VIT_17s0000g05070																VIT_04s0044g01610
			VIT_05s0077g01460																VIT_01s0011g03140
			VIT_18s0001g07960																VIT_01s0026g01060
			VIT_10s0071g00890																VIT_08s0040g00490
			VIT_03s0038g04000																VIT_19s0014g02190
			VIT_13s0084g00670																VIT_07s0104g01800
			VIT_18s0001g04800																VIT_18s0072g01090
			VIT_08s0007g02000																VIT_13s0047g01100
			VIT_19s0014g01050																VIT_02s0012g01260
			VIT_04s0008g05440																VIT_19s0090g00530
			VIT_03s0063g02650																VIT_05s0136g00340
			VIT_12s0035g00030																VIT_18s0117g00390
			VIT_14s0030g01000																VIT_14s0128g00510
			VIT_18s0001g05020																VIT_16s0039g01170
			VIT_12s0057g00150																VIT_02s0025g03170
			VIT_08s0040g01200																VIT_01s0150g00270
			VIT_12s0059g01590																VIT_11s0016g02790
			VIT_17s0000g03690																VIT_04s0008g00920
			VIT_13s0106g00610																VIT_02s0025g03070
			VIT_01s0011g05410																VIT_09s0002g04370
			VIT_06s0004g05870																VIT_12s0057g00570
			VIT_18s0001g06430																VIT_09s0002g03660
			VIT_03s0038g03550																VIT_08s0040g00460
			VIT_10s0116g00710																VIT_08s0058g00930
			VIT_09s0002g05980																VIT_05s0020g03180
			VIT_14s0068g01970																VIT_05s0029g00060
			VIT_12s0059g01430																VIT_18s0001g12530
			VIT_06s0004g00880																VIT_10s0003g02610
			VIT_16s0022g01020																VIT_14s0060g01120
			VIT_02s0033g01380																VIT_12s0028g00370
			VIT_03s0063g02350																VIT_19s0027g00080
			VIT_06s0004g05380																VIT_18s0001g03230
			VIT_17s0000g00070																VIT_08s0007g08350
			VIT_13s0019g00900																VIT_17s0000g06180
			VIT_11s0037g00510																VIT_04s0008g05030
			VIT_17s0000g07190																VIT_09s0054g01090
			VIT_07s0141g00290																VIT_04s0044g01000
			VIT_17s0000g04880																VIT_01s0011g01720
			VIT_19s0015g00260																VIT_13s0073g00530
			VIT_15s0048g02870																VIT_18s0001g11060
			VIT_08s0032g00890																VIT_18s0041g01240
			VIT_15s0048g01270																VIT_10s0071g00940
			VIT_12s0059g01060																VIT_08s0007g02510
			VIT_10s0003g00620																VIT_13s0019g03910
			VIT_14s0108g00990																VIT_18s0001g08850
			VIT_01s0137g00740																VIT_16s0098g01200
			VIT_03s0091g01290																VIT_01s0244g00070
			VIT_11s0052g00700																VIT_02s0234g00020
			VIT_15s0048g02630																VIT_12s0028g03740
			VIT_02s0033g01070																VIT_04s0023g02460
			VIT_19s0014g00960																VIT_06s0004g05550
			VIT_03s0063g00170																VIT_14s0108g01260
			VIT_16s0050g00270																VIT_07s0104g00130
			VIT_04s0023g01020																VIT_02s0025g03640
			VIT_04s0008g01520																VIT_05s0077g02040
			VIT_01s0011g04080																VIT_13s0156g00120
			VIT_19s0014g03960																VIT_19s0014g05200
			VIT_08s0007g08470																VIT_01s0011g06060
			VIT_11s0037g00850																VIT_03s0063g00200
			VIT_05s0020g01420																VIT_09s0002g02380
			VIT_04s0008g04060																VIT_14s0068g02060
			VIT_02s0025g03760																VIT_05s0077g00010
			VIT_06s0004g05180																VIT_07s0129g00050
			VIT_14s0066g01500																VIT_06s0009g01380
			VIT_19s0015g00010																VIT_04s0023g02560
			VIT_16s0050g00250																VIT_08s0007g07870
			VIT_05s0077g01250																VIT_19s0027g00340
			VIT_11s0118g00780																VIT_17s0000g07400
			VIT_09s0002g04240																VIT_08s0007g03920
			VIT_12s0055g01110																VIT_16s0022g01670
			VIT_13s0067g00220																VIT_05s0049g01270
			VIT_18s0001g10690																VIT_19s0014g01740
			VIT_12s0028g02000																VIT_12s0059g00270
			VIT_16s0100g00290																VIT_08s0007g06520
			VIT_01s0011g05200																VIT_01s0011g00370
			VIT_17s0000g09810																VIT_18s0117g00190
																			VIT_15s0021g01540
																			VIT_15s0048g01230
																			VIT_02s0025g01460
																			VIT_12s0034g01840
																			VIT_04s0008g00680
																			VIT_08s0007g06510
																			VIT_11s0037g00560
																			VIT_03s0038g03900
																			VIT_18s0001g07210
																			VIT_07s0005g00700
																			VIT_05s0077g00750
																			VIT_11s0037g00420
																			VIT_12s0134g00010
																			VIT_14s0128g00900
																			VIT_04s0044g00530
																			VIT_07s0005g00060
																			VIT_01s0026g02660
																			VIT_16s0115g00460
																			VIT_04s0023g00050
																			VIT_02s0012g00400
																			VIT_13s0067g02640
																			VIT_05s0020g01670
																			VIT_08s0007g07620
																			VIT_01s0011g04980
																			VIT_15s0048g01000
																			VIT_13s0156g00580
																			VIT_06s0061g01190
																			VIT_03s0038g02280
																			VIT_06s0061g01490
																			VIT_09s0002g04360
																			VIT_02s0025g01140
																			VIT_16s0039g01320
																			VIT_08s0040g01850
																			VIT_13s0019g01430
																			VIT_18s0041g00650
																			VIT_06s0061g01100
																			VIT_06s0061g00820
																			VIT_01s0010g03950
																			VIT_15s0045g01120
																			VIT_03s0038g03150
																			VIT_16s0100g01270
																			VIT_19s0014g04080
																			VIT_02s0025g02420
																			VIT_15s0048g01060
																			VIT_16s0098g00240
																			VIT_19s0085g00650
																			VIT_12s0057g00470
																			VIT_04s0044g00060
																			VIT_05s0049g00980
																			VIT_10s0116g01840
																			VIT_10s0092g00090
																			VIT_08s0007g05490
																			VIT_11s0206g00060
																			VIT_05s0062g01180
																			VIT_08s0056g00180
																			VIT_17s0000g06600
																			VIT_03s0038g02960
																			VIT_04s0008g01320
																			VIT_18s0001g02440
																			VIT_19s0014g05220
																			VIT_16s0039g01850
																			VIT_06s0009g00320
																			VIT_13s0064g01470
																			VIT_15s0046g03090
																			VIT_03s0038g01360
																			VIT_16s0050g01240
																			VIT_12s0035g00970
																			VIT_14s0081g00010
																			VIT_18s0001g10450
																			VIT_17s0000g03160
																			VIT_13s0019g01070
																			VIT_12s0035g01590
																			VIT_02s0154g00390
																			VIT_18s0001g08290
																			VIT_07s0104g00730
																			VIT_07s0005g00290
																			VIT_06s0004g03230
																			VIT_07s0005g02070
																			VIT_12s0028g00610
																			VIT_06s0004g04550
																			VIT_07s0005g03660
																			VIT_09s0002g01130
																			VIT_15s0046g01500
																			VIT_04s0008g06690
																			VIT_04s0069g00740
																			VIT_07s0031g00690
																			VIT_16s0039g01550
																			VIT_14s0128g00390
																			VIT_19s0090g00060
																			VIT_02s0154g00010
																			VIT_12s0035g00990
																			VIT_03s0017g00460
																			VIT_11s0016g01390
																			VIT_01s0011g00470
																			VIT_09s0018g01940
																			VIT_19s0093g00550
																			VIT_08s0032g01190
																			VIT_09s0002g00820
																			VIT_12s0059g00590
																			VIT_06s0004g02480
																			VIT_04s0008g03220
																			VIT_18s0001g10270
																			VIT_07s0031g02870
																			VIT_14s0060g00310
																			VIT_13s0101g00100
																			VIT_14s0030g01930
																			VIT_02s0033g00130
																			VIT_11s0016g00810

## Sheet: Go-term
	839 gene for all									527 gene for S5 Noble									S6 263 genes								S7	964 gene
	GO:0003824	catalytic activity	292	0.0002	0.0507	F	details			GO ID	GO Term	Count	p-value	q-value(BH)	Aspect	Genes
	GO:0044699	single-organism process	289	0.00044	0.1027	P	details			GO:0005623	cell	234	0.00838	0.7342	C	details			GO:0005886	plasma membrane	27	0.00969	1	C	details			GO:0051179	localization	100	0.00211	0.6516	P	details
	GO:0016020	membrane	238	0.00095	0.0361	C	details			GO:0009987	cellular process	224	0.0077	0.5469	P	details			GO:0019748	secondary metabolic process	10	0.0061	1	P	details			GO:0051234	establishment of localization	99	0.00106	0.5694	P	details
	GO:0044425	membrane part	190	0.00172	0.06013	C	details			GO:0044424	intracellular part	200	0.00683	0.7342	C	details			GO:0044459	plasma membrane part	10	0.00202	0.7983	C	details			GO:0006810	transport	96	0.00232	0.6767	P	details
	GO:0031224	intrinsic component of membrane	184	0.00056	0.02225	C	details			GO:0043229	intracellular organelle	173	0.00631	0.7342	C	details			GO:0006970	response to osmotic stress	9	0.0081	1	P	details			GO:1902578	single-organism localization	87	0.00063	0.5694	P	details
	GO:0016021	integral component of membrane	177	0.00236	0.06875	C	details			GO:0043226	organelle	173	0.00748	0.7342	C	details			GO:0031226	intrinsic component of plasma membrane	9	0.00274	0.7983	C	details			GO:0044765	single-organism transport	85	0.00084	0.5694	P	details
	GO:0044710	single-organism metabolic process	166	0.00072	0.1454	P	details			GO:0043231	intracellular membrane-bounded organelle	169	0.00084	0.3889	C	details			GO:0044550	secondary metabolite biosynthetic process	8	0.0071	1	P	details			GO:0055085	transmembrane transport	53	0.00576	0.8894	P	details
	GO:0071944	cell periphery	117	1.6e-08	2.797e-06	C	details			GO:0043227	membrane-bounded organelle	169	0.00089	0.3889	C	details			GO:0005887	integral component of plasma membrane	8	0.00083	0.7254	C	details			GO:0006811	ion transport	42	0.00722	0.9463	P	details
	GO:0016787	hydrolase activity	109	0.00121	0.1917	F	details			GO:0044763	single-organism cellular process	143	0.00257	0.3066	P	details			GO:0009813	flavonoid biosynthetic process	6	0.0048	1	P	details			GO:1902589	single-organism organelle organization	31	0.00631	0.9463	P	details
	GO:0055114	oxidation-reduction process	91	1.3e-06	0.0008531	P	details			GO:0006807	nitrogen compound metabolic process	103	0.00147	0.2285	P	details			GO:0009812	flavonoid metabolic process	6	0.007	1	P	details			GO:0032259	methylation	24	0.00187	0.6516	P	details
	GO:0016491	oxidoreductase activity	85	2.3e-07	0.0001458	F	details			GO:0065007	biological regulation	102	8.7e-05	0.08531	P	details			GO:0019585	glucuronate metabolic process	5	0.0065	1	P	details			GO:0051186	cofactor metabolic process	19	0.00573	0.8894	P	details
	GO:0005886	plasma membrane	84	0.00014	0.006118	C	details			GO:0050896	response to stimulus	100	0.00196	0.2858	P	details			GO:0052695	cellular glucuronidation	5	0.0065	1	P	details			GO:0006732	coenzyme metabolic process	17	0.00141	0.5694	P	details
	GO:0009628	response to abiotic stimulus	64	4.7e-06	0.002468	P	details			GO:0050789	regulation of biological process	94	4.1e-05	0.08531	P	details			GO:0052696	flavonoid glucuronidation	5	0.0065	1	P	details			GO:0000280	nuclear division	11	0.00961	1	P	details
	GO:0005975	carbohydrate metabolic process	59	5e-05	0.01875	P	details			GO:0034641	cellular nitrogen compound metabolic process	91	0.00852	0.5522	P	details			GO:0006063	uronic acid metabolic process	5	0.0068	1	P	details			GO:0072524	pyridine-containing compound metabolic process	10	0.00206	0.6516	P	details
	GO:0005215	transporter activity	51	0.00814	0.6967	F	details			GO:1901360	organic cyclic compound metabolic process	86	0.0044	0.3915	P	details			GO:0080043	quercetin 3-O-glucosyltransferase activity	5	0.0048	1	F	details			GO:0006733	oxidoreduction coenzyme metabolic process	10	0.00345	0.7229	P	details
	GO:0055085	transmembrane transport	49	0.00646	0.6056	P	details			GO:0046483	heterocycle metabolic process	84	0.00125	0.2188	P	details			GO:0080044	quercetin 7-O-glucosyltransferase activity	5	0.0048	1	F	details			GO:0019362	pyridine nucleotide metabolic process	9	0.00418	0.7837	P	details
	GO:0071554	cell wall organization or biogenesis	44	2e-11	1.05e-07	P	details			GO:0050794	regulation of cellular process	83	7.3e-05	0.08531	P	details			GO:0010026	trichome differentiation	4	0.0085	1	P	details			GO:0046496	nicotinamide nucleotide metabolic process	9	0.00418	0.7837	P	details
	GO:0022857	transmembrane transporter activity	44	0.00841	0.6967	F	details			GO:0006725	cellular aromatic compound metabolic process	83	0.00772	0.5469	P	details			GO:0009624	response to nematode	3	0.0082	1	P	details			GO:0044724	single-organism carbohydrate catabolic process	9	0.00683	0.9463	P	details
	GO:0005618	cell wall	41	2.9e-08	3.995e-06	C	details			GO:0005634	nucleus	80	0.00586	0.7342	C	details			GO:1900424	regulation of defense response to bacterium	2	0.0094	1	P	details			GO:0007131	reciprocal meiotic recombination	6	0.0032	0.7229	P	details
	GO:0030312	external encapsulating structure	41	3.2e-08	3.995e-06	C	details			GO:0006139	nucleobase-containing compound metabolic process	78	0.00148	0.2285	P	details												GO:0035825	reciprocal DNA recombination	6	0.0032	0.7229	P	details
	GO:0005576	extracellular region	40	5.4e-09	1.18e-06	C	details			GO:0090304	nucleic acid metabolic process	71	0.00118	0.2188	P	details												GO:0006304	DNA modification	6	0.00694	0.9463	P	details
	GO:0046906	tetrapyrrole binding	38	9.2e-08	7.774e-05	F	details			GO:0044271	cellular nitrogen compound biosynthetic process	62	0.00848	0.5522	P	details												GO:0044728	DNA methylation or demethylation	6	0.00694	0.9463	P	details
	GO:0022891	substrate-specific transmembrane transporter activity	34	0.00959	0.7367	F	details			GO:1901362	organic cyclic compound biosynthetic process	59	0.00061	0.1525	P	details												GO:0007127	meiosis I	6	0.00843	1	P	details
	GO:0016757	transferase activity, transferring glycosyl groups	32	3.3e-05	0.01394	F	details			GO:0018130	heterocycle biosynthetic process	58	5.8e-05	0.08531	P	details												GO:0015858	nucleoside transport	5	0.0003	0.5694	P	details
	GO:0031984	organelle subcompartment	32	0.00051	0.02123	C	details			GO:0016070	RNA metabolic process	58	0.00963	0.6166	P	details												GO:0005985	sucrose metabolic process	4	0.00551	0.8894	P	details
	GO:0071555	cell wall organization	31	3.3e-09	5.565e-06	P	details			GO:0019438	aromatic compound biosynthetic process	56	0.00094	0.2056	P	details												GO:0009310	amine catabolic process	3	0.00079	0.5694	P	details
	GO:0045229	external encapsulating structure organization	31	2.8e-08	2.1e-05	P	details			GO:0019222	regulation of metabolic process	56	0.00359	0.3747	P	details												GO:0042402	cellular biogenic amine catabolic process	3	0.00079	0.5694	P	details
	GO:0005976	polysaccharide metabolic process	29	5.3e-06	0.00253	P	details			GO:0051716	cellular response to stimulus	54	0.00013	0.08531	P	details												GO:0050665	hydrogen peroxide biosynthetic process	3	0.00134	0.5694	P	details
	GO:0009579	thylakoid	29	2.8e-05	0.00136	C	details			GO:0034654	nucleobase-containing compound biosynthetic process	53	9e-05	0.08531	P	details												GO:0030705	cytoskeleton-dependent intracellular transport	3	0.00209	0.6516	P	details
	GO:0004553	hydrolase activity, hydrolyzing O-glycosyl compounds	29	7.6e-05	0.02752	F	details			GO:0031323	regulation of cellular metabolic process	51	0.00131	0.2219	P	details												GO:0015868	purine ribonucleotide transport	3	0.00569	0.8894	P	details
	GO:0009416	response to light stimulus	29	0.00011	0.03397	P	details			GO:0009536	plastid	51	0.00855	0.7342	C	details												GO:0051503	adenine nucleotide transport	3	0.00569	0.8894	P	details
	GO:0020037	heme binding	29	0.00018	0.0507	F	details			GO:0060255	regulation of macromolecule metabolic process	50	0.00254	0.3066	P	details												GO:1901642	nucleoside transmembrane transport	3	0.00569	0.8894	P	details
	GO:0009314	response to radiation	29	0.00031	0.08925	P	details			GO:0097659	nucleic acid-templated transcription	48	0.00012	0.08531	P	details												GO:0006346	methylation-dependent chromatin silencing	3	0.00739	0.9463	P	details
	GO:0016798	hydrolase activity, acting on glycosyl bonds	29	0.00035	0.07394	F	details			GO:0032774	RNA biosynthetic process	48	0.00012	0.08531	P	details												GO:0015865	purine nucleotide transport	3	0.00739	0.9463	P	details
	GO:0034357	photosynthetic membrane	27	5.4e-07	4.72e-05	C	details			GO:0042221	response to chemical	48	0.00291	0.3333	P	details												GO:1902850	microtubule cytoskeleton organization involved in mitosis	3	0.00936	1	P	details
	GO:0044436	thylakoid part	27	1.6e-06	0.0001271	C	details			GO:0080090	regulation of primary metabolic process	48	0.00318	0.3533	P	details												GO:1903409	reactive oxygen species biosynthetic process	3	0.00936	1	P	details
	GO:0009534	chloroplast thylakoid	27	4e-06	0.0002331	C	details			GO:0019219	regulation of nucleobase-containing compound metabolic process	46	0.00018	0.09068	P	details												GO:0006569	tryptophan catabolic process	2	0.00122	0.5694	P	details
	GO:0031976	plastid thylakoid	27	4e-06	0.0002331	C	details			GO:0006351	transcription, DNA-templated	46	0.0003	0.09265	P	details												GO:0019441	tryptophan catabolic process to kynurenine	2	0.00122	0.5694	P	details
	GO:0044459	plasma membrane part	26	6.6e-05	0.003036	C	details			GO:0051171	regulation of nitrogen compound metabolic process	46	0.00088	0.2009	P	details												GO:0046218	indolalkylamine catabolic process	2	0.00122	0.5694	P	details
	GO:0009535	chloroplast thylakoid membrane	25	3.9e-07	4.261e-05	C	details			GO:0010556	regulation of macromolecule biosynthetic process	45	0.00057	0.1496	P	details												GO:0070189	kynurenine metabolic process	2	0.00122	0.5694	P	details
	GO:0055035	plastid thylakoid membrane	25	4.5e-07	4.37e-05	C	details			GO:0031326	regulation of cellular biosynthetic process	45	0.00115	0.2188	P	details												GO:0080055	low-affinity nitrate transport	2	0.00122	0.5694	P	details
	GO:0042651	thylakoid membrane	25	2.3e-06	0.0001675	C	details			GO:0009889	regulation of biosynthetic process	45	0.00147	0.2285	P	details												GO:0005987	sucrose catabolic process	2	0.00358	0.7229	P	details
	GO:0031226	intrinsic component of plasma membrane	25	1.8e-05	0.0009254	C	details			GO:0010468	regulation of gene expression	45	0.0023	0.3062	P	details												GO:0010970	microtubule-based transport	2	0.00358	0.7229	P	details
	GO:0004497	monooxygenase activity	25	0.0001	0.03169	F	details			GO:1903506	regulation of nucleic acid-templated transcription	44	0.00019	0.09068	P	details												GO:0035721	intraciliary retrograde transport	2	0.00358	0.7229	P	details
	GO:0016758	transferase activity, transferring hexosyl groups	25	0.00031	0.07144	F	details			GO:2001141	regulation of RNA biosynthetic process	44	0.00019	0.09068	P	details												GO:0042073	intraciliary transport	2	0.00358	0.7229	P	details
	GO:0009941	chloroplast envelope	25	0.00208	0.06733	C	details			GO:0051252	regulation of RNA metabolic process	44	0.00028	0.09187	P	details												GO:0042436	indole-containing compound catabolic process	2	0.00358	0.7229	P	details
	GO:0009526	plastid envelope	25	0.00348	0.09811	C	details			GO:2000112	regulation of cellular macromolecule biosynthetic process	44	0.00067	0.1599	P	details												GO:0022857	transmembrane transporter activity	49	0.00371	0.7207	F	details
	GO:0016705	oxidoreductase activity, acting on paired donors, with incorporation or reduction of molecular oxygen	23	0.00774	0.6967	F	details			GO:0006355	regulation of transcription, DNA-templated	43	0.00024	0.09187	P	details												GO:0022892	substrate-specific transporter activity	41	0.00626	0.8352	F	details
	GO:0015979	photosynthesis	22	4.4e-09	5.565e-06	P	details			GO:0003677	DNA binding	42	0.00999	1	F	details												GO:0022891	substrate-specific transmembrane transporter activity	40	0.00136	0.431	F	details
	GO:0098796	membrane protein complex	22	0.00431	0.1136	C	details			GO:0007154	cell communication	36	0.01	0.6325	P	details												GO:0015075	ion transmembrane transporter activity	34	0.00182	0.4614	F	details
	GO:0019748	secondary metabolic process	22	0.00905	0.72	P	details			GO:0010033	response to organic substance	35	0.00513	0.4415	P	details												GO:0008168	methyltransferase activity	19	0.00953	0.9108	F	details
	GO:0048046	apoplast	21	8.3e-06	0.0004534	C	details			GO:0044700	single organism signaling	33	0.00408	0.3822	P	details												GO:0008757	S-adenosylmethionine-dependent methyltransferase activity	15	0.00334	0.7056	F	details
	GO:0009266	response to temperature stimulus	21	0.002	0.2951	P	details			GO:0023052	signaling	33	0.00415	0.3822	P	details												GO:0008509	anion transmembrane transporter activity	15	0.00456	0.7478	F	details
	GO:0044262	cellular carbohydrate metabolic process	21	0.00208	0.2951	P	details			GO:0007165	signal transduction	32	0.00679	0.5092	P	details												GO:0016810	hydrolase activity, acting on carbon-nitrogen (but not peptide) bonds	9	0.00319	0.7056	F	details
	GO:0071669	plant-type cell wall organization or biogenesis	18	6.2e-06	0.002713	P	details			GO:0009719	response to endogenous stimulus	31	0.00439	0.3915	P	details												GO:0008237	metallopeptidase activity	8	0.00398	0.7207	F	details
	GO:0044264	cellular polysaccharide metabolic process	18	0.00054	0.1134	P	details			GO:0009725	response to hormone	30	0.00376	0.3796	P	details												GO:0016811	hydrolase activity, acting on carbon-nitrogen (but not peptide) bonds, in linear amides	7	0.00034	0.3875	F	details
	GO:0044550	secondary metabolite biosynthetic process	18	0.0045	0.4632	P	details			GO:0070887	cellular response to chemical stimulus	25	0.00026	0.09187	P	details												GO:0016671	oxidoreductase activity, acting on a sulfur group of donors, disulfide as acceptor	6	0.0018	0.4614	F	details
	GO:0009521	photosystem	17	4e-12	3.321e-09	C	details			GO:0071310	cellular response to organic substance	21	0.00054	0.1492	P	details												GO:0005337	nucleoside transmembrane transporter activity	5	0.00062	0.3875	F	details
	GO:0044042	glucan metabolic process	17	0.00034	0.08925	P	details			GO:0032870	cellular response to hormone stimulus	19	0.00024	0.09187	P	details												GO:0015932	nucleobase-containing compound transmembrane transporter activity	5	0.00472	0.7478	F	details
	GO:0006091	generation of precursor metabolites and energy	17	0.00207	0.2951	P	details			GO:0071495	cellular response to endogenous stimulus	19	0.00028	0.09187	P	details												GO:0019842	vitamin binding	5	0.00766	0.9108	F	details
	GO:0008194	UDP-glycosyltransferase activity	17	0.00416	0.4793	F	details			GO:0006259	DNA metabolic process	17	0.00621	0.4794	P	details												GO:0000295	adenine nucleotide transmembrane transporter activity	3	0.00976	0.9108	F	details
	GO:0006073	cellular glucan metabolic process	16	0.00051	0.1116	P	details			GO:0009755	hormone-mediated signaling pathway	16	0.00174	0.261	P	details												GO:0004743	pyruvate kinase activity	3	0.00976	0.9108	F	details
	GO:0005887	integral component of plasma membrane	16	0.00101	0.03678	C	details			GO:0048583	regulation of response to stimulus	15	0.00323	0.3533	P	details												GO:0030955	potassium ion binding	3	0.00976	0.9108	F	details
	GO:0008509	anion transmembrane transporter activity	15	0.00204	0.2586	F	details			GO:0004871	signal transducer activity	9	0.00167	1	F	details												GO:0031420	alkali metal ion binding	3	0.00976	0.9108	F	details
	GO:0035251	UDP-glucosyltransferase activity	15	0.00204	0.2586	F	details			GO:0060089	molecular transducer activity	9	0.00467	1	F	details												GO:0004061	arylformamidase activity	2	0.00107	0.3875	F	details
	GO:0046527	glucosyltransferase activity	15	0.00317	0.3827	F	details			GO:0071215	cellular response to abscisic acid stimulus	8	0.00347	0.3718	P	details												GO:0004067	asparaginase activity	2	0.00107	0.3875	F	details
	GO:0042546	cell wall biogenesis	14	2.2e-05	0.008885	P	details			GO:0006260	DNA replication	8	0.00364	0.3747	P	details												GO:0008821	crossover junction endodeoxyribonuclease activity	2	0.00107	0.3875	F	details
	GO:0009505	plant-type cell wall	14	0.00199	0.06689	C	details			GO:0005516	calmodulin binding	7	0.00218	1	F	details												GO:0016889	endodeoxyribonuclease activity, producing 3'-phosphomonoesters	2	0.00107	0.3875	F	details
	GO:0055082	cellular chemical homeostasis	14	0.00242	0.3099	P	details			GO:0005057	receptor signaling protein activity	6	0.00121	1	F	details												GO:0080054	low-affinity nitrate transmembrane transporter activity	2	0.00107	0.3875	F	details
	GO:0050801	ion homeostasis	14	0.00877	0.7194	P	details			GO:0006643	membrane lipid metabolic process	6	0.00465	0.4069	P	details												GO:0004575	sucrose alpha-glucosidase activity	2	0.00617	0.8352	F	details
	GO:0009522	photosystem I	13	7.6e-12	3.321e-09	C	details			GO:0000160	phosphorelay signal transduction system	6	0.00673	0.5092	P	details												GO:0033743	peptide-methionine (R)-S-oxide reductase activity	2	0.00617	0.8352	F	details
	GO:0009523	photosystem II	13	9.1e-11	2.651e-08	C	details			GO:0009069	serine family amino acid metabolic process	5	0.00292	0.3333	P	details												GO:0009536	plastid	80	0.0051	0.7429	C	details
	GO:0019684	photosynthesis, light reaction	13	3.7e-06	0.002158	P	details			GO:0023014	signal transduction by protein phosphorylation	5	0.00818	0.5469	P	details												GO:0009507	chloroplast	77	0.0044	0.7429	C	details
	GO:0000271	polysaccharide biosynthetic process	13	0.00295	0.3442	P	details			GO:0042646	plastid nucleoid	4	0.00283	0.7342	C	details												GO:0044434	chloroplast part	48	0.0092	0.8365	C	details
	GO:0098656	anion transmembrane transport	13	0.00461	0.4654	P	details			GO:0009295	nucleoid	4	0.00663	0.7342	C	details												GO:0098687	chromosomal region	7	0.0069	0.7538	C	details
	GO:0055080	cation homeostasis	13	0.00824	0.6867	P	details			GO:0045926	negative regulation of growth	3	0.0021	0.298	P	details												GO:0000778	condensed nuclear chromosome kinetochore	3	0.0024	0.7429	C	details
	GO:0016709	oxidoreductase activity, acting on paired donors, with incorporation or reduction of molecular oxygen, NAD(P)H as one donor, and incorporation of one atom of oxygen	13	0.00898	0.7114	F	details			GO:0006544	glycine metabolic process	3	0.00393	0.3822	P	details												GO:0000780	condensed nuclear chromosome, centromeric region	3	0.0049	0.7429	C	details
	GO:0030003	cellular cation homeostasis	12	0.00141	0.2243	P	details			GO:0030148	sphingolipid biosynthetic process	3	0.00555	0.467	P	details												GO:0000777	condensed chromosome kinetochore	3	0.0066	0.7538	C	details
	GO:0006873	cellular ion homeostasis	12	0.00192	0.2951	P	details			GO:0030136	clathrin-coated vesicle	3	0.00944	0.7342	C	details												GO:0030990	intraciliary transport particle	2	0.004	0.7429	C	details
	GO:0034637	cellular carbohydrate biosynthetic process	12	0.00942	0.72	P	details			GO:0045140	inositol phosphoceramide synthase activity	2	0.00038	0.9633	F	details												GO:0030991	intraciliary transport particle A	2	0.004	0.7429	C	details
	GO:0010287	plastoglobule	11	2.6e-06	0.0001748	C	details			GO:0006154	adenosine catabolic process	2	0.00042	0.1225	P	details
	GO:0009664	plant-type cell wall organization	11	0.00045	0.1027	P	details			GO:0046085	adenosine metabolic process	2	0.00124	0.2188	P	details
	GO:0033692	cellular polysaccharide biosynthetic process	11	0.00661	0.6088	P	details			GO:0046102	inosine metabolic process	2	0.00124	0.2188	P	details
	GO:0009765	photosynthesis, light harvesting	10	5.3e-09	5.565e-06	P	details			GO:0046130	purine ribonucleoside catabolic process	2	0.00124	0.2188	P	details
	GO:0009832	plant-type cell wall biogenesis	10	0.00041	0.1025	P	details			GO:0006278	RNA-dependent DNA replication	2	0.00245	0.3062	P	details
	GO:0009642	response to light intensity	10	0.00091	0.1769	P	details			GO:0007004	telomere maintenance via telomerase	2	0.00245	0.3062	P	details
	GO:0031225	anchored component of membrane	10	0.00222	0.06751	C	details			GO:0010833	telomere maintenance via telomere lengthening	2	0.00245	0.3062	P	details
	GO:0006875	cellular metal ion homeostasis	10	0.00259	0.3237	P	details			GO:0046621	negative regulation of organ growth	2	0.00245	0.3062	P	details
	GO:0009250	glucan biosynthetic process	10	0.00432	0.4536	P	details			GO:0003968	RNA-directed RNA polymerase activity	2	0.00368	1	F	details
	GO:0009408	response to heat	10	0.00766	0.6554	P	details			GO:0001172	transcription, RNA-templated	2	0.00403	0.3822	P	details
	GO:0031409	pigment binding	9	3.3e-11	8.366e-08	F	details			GO:0042454	ribonucleoside catabolic process	2	0.00403	0.3822	P	details
	GO:0009768	photosynthesis, light harvesting in photosystem I	9	1.4e-10	3.675e-07	P	details			GO:0006152	purine nucleoside catabolic process	2	0.00596	0.467	P	details
	GO:0016168	chlorophyll binding	9	6.6e-09	8.365e-06	F	details			GO:0009643	photosynthetic acclimation	2	0.00596	0.467	P	details
	GO:0018298	protein-chromophore linkage	9	2.8e-08	2.1e-05	P	details			GO:0010120	camalexin biosynthetic process	2	0.00596	0.467	P	details
	GO:0030244	cellulose biosynthetic process	9	0.00132	0.2243	P	details			GO:0048640	negative regulation of developmental growth	2	0.00596	0.467	P	details
	GO:0051274	beta-glucan biosynthetic process	9	0.00271	0.3309	P	details			GO:0052317	camalexin metabolic process	2	0.00596	0.467	P	details
	GO:0030243	cellulose metabolic process	9	0.00313	0.3496	P	details			GO:0019209	kinase activator activity	2	0.00752	1	F	details
	GO:0045488	pectin metabolic process	9	0.00313	0.3496	P	details			GO:0030295	protein kinase activator activity	2	0.00752	1	F	details
	GO:0010393	galacturonan metabolic process	9	0.00337	0.3611	P	details			GO:0009164	nucleoside catabolic process	2	0.00823	0.5469	P	details
	GO:0046658	anchored component of plasma membrane	9	0.00442	0.1136	C	details			GO:0009403	toxin biosynthetic process	2	0.00823	0.5469	P	details
	GO:0051273	beta-glucan metabolic process	9	0.00613	0.5851	P	details			GO:0009700	indole phytoalexin biosynthetic process	2	0.00823	0.5469	P	details
	GO:0009637	response to blue light	8	7.9e-05	0.02765	P	details
	GO:0009644	response to high light intensity	8	9.3e-05	0.03052	P	details
	GO:0004857	enzyme inhibitor activity	8	0.00787	0.6967	F	details
	GO:0046916	cellular transition metal ion homeostasis	8	0.00986	0.7291	P	details
	GO:0016762	xyloglucan:xyloglucosyl transferase activity	7	3e-05	0.01394	F	details
	GO:0009834	plant-type secondary cell wall biogenesis	7	0.00034	0.08925	P	details
	GO:0004190	aspartic-type endopeptidase activity	7	0.00189	0.2586	F	details
	GO:0070001	aspartic-type peptidase activity	7	0.00189	0.2586	F	details
	GO:0080167	response to karrikin	7	0.00751	0.6554	P	details
	GO:0016679	oxidoreductase activity, acting on diphenols and related substances as donors	6	0.00991	0.7389	F	details
	GO:0046910	pectinesterase inhibitor activity	5	0.00094	0.1589	F	details
	GO:0009690	cytokinin metabolic process	5	0.00281	0.3353	P	details
	GO:0005615	extracellular space	5	0.0039	0.1065	C	details
	GO:0044421	extracellular region part	5	0.00565	0.1411	C	details
	GO:0034754	cellular hormone metabolic process	5	0.00774	0.6554	P	details
	GO:0009902	chloroplast relocation	4	0.00139	0.2243	P	details
	GO:0019750	chloroplast localization	4	0.00139	0.2243	P	details
	GO:0051644	plastid localization	4	0.00139	0.2243	P	details
	GO:0051667	establishment of plastid localization	4	0.00139	0.2243	P	details
	GO:0009986	cell surface	3	0.00224	0.06751	C	details
	GO:0009687	abscisic acid metabolic process	3	0.00237	0.3099	P	details
	GO:0043288	apocarotenoid metabolic process	3	0.00237	0.3099	P	details
	GO:1902644	tertiary alcohol metabolic process	3	0.00237	0.3099	P	details
	GO:0009750	response to fructose	3	0.00331	0.3611	P	details
	GO:0009645	response to low light intensity stimulus	3	0.00579	0.5717	P	details
	GO:0009903	chloroplast avoidance movement	3	0.00735	0.654	P	details
	GO:0010187	negative regulation of seed germination	3	0.00735	0.654	P	details
	GO:0010328	auxin influx transmembrane transporter activity	2	0.0009	0.1589	F	details
	GO:0016984	ribulose-bisphosphate carboxylase activity	2	0.0009	0.1589	F	details
	GO:0010321	regulation of vegetative phase change	2	0.00588	0.5717	P	details
	GO:0004322	ferroxidase activity	2	0.00852	0.6967	F	details
	GO:0008199	ferric iron binding	2	0.00852	0.6967	F	details
	GO:0009916	alternative oxidase activity	2	0.00852	0.6967	F	details
	GO:0016724	oxidoreductase activity, oxidizing metal ions, oxygen as acceptor	2	0.00852	0.6967	F	details
	GO:0052691	UDP-arabinopyranose mutase activity	2	0.00852	0.6967	F	details
	GO:0009538	photosystem I reaction center	2	0.00922	0.2178	C	details
	GO:0098807	chloroplast thylakoid membrane protein complex	2	0.00922	0.2178	C	details
	GO:0009688	abscisic acid biosynthetic process	2	0.0096	0.72	P	details
	GO:0030007	cellular potassium ion homeostasis	2	0.0096	0.72	P	details
	GO:0043289	apocarotenoid biosynthetic process	2	0.0096	0.72	P	details
	GO:1902645	tertiary alcohol biosynthetic process	2	0.0096	0.72	P	details

## Sheet: TF 
TF
																														shared 16 genes
			78	in 964 S7 genes								43 TF in 264 S6 genes										43 TF in 264 S6 genes							264 964	16	GSVIVG01017835001
VIT_15s0046g01440	bZip		GSVIVG01027040001	26346	1467	759	84	6.794e-10	1.821e-07		VIT_18s0001g13320	GSVIVG01009801001	26346	2438	206	33	0.0006571	0.08056													GSVIVG01009845001
VIT_13s0175g00120	bZip		GSVIVG01001940001	26346	1526	759	84	4.377e-09	5.865e-07		VIT_05s0020g02160	GSVIVG01017835001	26346	190	206	6	0.0007668	0.08056													GSVIVG01031338001
VIT_02s0012g02250	bZip		GSVIVG01013053001	26346	1612	759	86	1.235e-08	8.401e-07		VIT_12s0035g02020	GSVIVG01023123001	26346	319	206	8	0.0009629	0.08056													GSVIVG01011589001
VIT_08s0007g03420			GSVIVG01033832001	26346	1536	759	83	1.254e-08	8.401e-07			GSVIVG01027579001	26346	10323	206	101	0.001598	0.1003													GSVIVG01028208001
			GSVIVG01009485001	26346	1512	759	79	1.155e-07	6.189e-06			GSVIVG01011902001	26346	2006	206	27	0.002023	0.1016													GSVIVG01011902001
			GSVIVG01028516001	26346	1369	759	72	3.216e-07	1.437e-05		VIT_18s0001g05890	GSVIVG01036389001	26346	3293	206	39	0.002959	0.1153													GSVIVG01011138001
VIT_14s0060g00260	bHLH		GSVIVG01031338001	26346	1240	759	62	1.001e-05	0.0003832		VIT_07s0005g01210	GSVIVG01028091001	26346	184	206	5	0.003338	0.1153								-	Vitis vinifera				GSVIVG01021790001
VIT_18s0001g08600	bHLH		GSVIVG01009292001	26346	1204	759	60	1.511e-05	0.0005061		VIT_14s0030g02200	GSVIVG01021790001	26346	1050	206	16	0.003801	0.1153													GSVIVG01027811001
VIT_01s0010g00540	bHLH		GSVIVG01010100001	26346	1014	759	52	2.425e-05	0.0007222		VIT_08s0040g00240	GSVIVG01025855001	26346	6728	206	69	0.004136	0.1153													GSVIVG01028091001
VIT_14s0060g01210	bZip		GSVIVG01031238001	26346	921	759	47	6.281e-05	0.001683			GSVIVG01019049001	26346	9679	206	93	0.005287	0.1177								-	Vitis vinifera				GSVIVG01009273001
VIT_07s0031g00450	bHLH		GSVIVG01022111001	26346	1206	759	57	0.0001028	0.00222			GSVIVG01032961001	26346	2569	206	31	0.005602	0.1177													GSVIVG01034485001
VIT_04s0023g01360	bZip		GSVIVG01019009001	26346	1481	759	67	0.0001051	0.00222		VIT_01s0011g06380	GSVIVG01011589001	26346	7411	206	74	0.005839	0.1177													GSVIVG01032415001
VIT_01s0010g00930	bZip		GSVIVG01010152001	26346	942	759	47	0.0001077	0.00222		VIT_15s0021g01610	GSVIVG01018270001	26346	2584	206	31	0.006096	0.1177								DNA-binding transcription factor	Vitis vinifera				GSVIVG01020578001
VIT_04s0008g05210	bZip		GSVIVG01035829001	26346	795	759	41	0.0001336	0.002558		VIT_18s0001g08380	GSVIVG01009273001	26346	5809	206	60	0.006715	0.1204													GSVIVG01027579001
VIT_07s0005g02260	SBP	SPL1	GSVIVG01028208001	26346	156	759	13	0.0001766	0.003155		VIT_07s0005g02260	GSVIVG01028208001	26346	156	206	4	0.00776	0.1298													GSVIVG01019049001
VIT_14s0030g02200	bZip		GSVIVG01021790001	26346	1050	759	50	0.0002121	0.003392		VIT_14s0060g00260	GSVIVG01031338001	26346	1240	206	17	0.008818	0.1383								RNA metabolism protein	Vitis vinifera
VIT_17s0000g04790	bHLH		GSVIVG01008164001	26346	839	759	42	0.0002152	0.003392		VIT_05s0049g01020	GSVIVG01027811001	26346	2515	206	29	0.01299	0.1824
		BES1	GSVIVG01036911001	26346	737	759	37	0.0004395	0.006544		VIT_05s0077g01860	GSVIVG01035098001	26346	914	206	13	0.01308	0.1824
	bZip		GSVIVG01023817001	26346	1005	759	47	0.0004689	0.006614		VIT_04s0079g00280	GSVIVG01035214001	26346	570	206	9	0.01466	0.1881								DNA-binding transcription factor	Vitis vinifera
	AP2		GSVIVG01019049001	26346	9679	759	321	0.0006138	0.008225		VIT_08s0105g00170	GSVIVG01011138001	26346	751	206	11	0.01551	0.1881
	bHLH		GSVIVG01027766001	26346	717	759	35	0.0009865	0.01259		VIT_09s0018g00240	GSVIVG01015952001	26346	494	206	8	0.01615	0.1881
VIT_18s0001g13730	BBR-BPC		GSVIVG01009845001	26346	5654	759	197	0.001172	0.01428		VIT_10s0003g02070	GSVIVG01021303001	26346	1039	206	14	0.01693	0.1881								-	Vitis vinifera
VIT_05s0077g01240	CAMTA		GSVIVG01035027001	26346	520	759	27	0.001268	0.01478			GSVIVG01032415001	26346	2801	206	31	0.01841	0.1881
VIT_01s0011g06380	BBR-BPC		GSVIVG01011589001	26346	7411	759	250	0.0014	0.01563		VIT_01s0011g04260	GSVIVG01011819001	26346	271	206	5	0.02014	0.1881
VIT_12s0028g03350	SBP		GSVIVG01020578001	26346	239	759	15	0.001636	0.01754		VIT_18s0072g01060	GSVIVG01034485001	26346	271	206	5	0.02014	0.1881								MADS box transcription factor	Vitis vinifera
	TCP7		GSVIVG01026145001	26346	1527	759	63	0.00175	0.01804		VIT_04s0008g02710	GSVIVG01035554001	26346	272	206	5	0.02047	0.1881
VIT_14s0083g01060	MYB		GSVIVG01036552001	26346	178	759	12	0.002029	0.02014		VIT_13s0067g01630	GSVIVG01012447001	26346	133	206	3	0.0207	0.1881
VIT_08s0105g00170	DOF		GSVIVG01011138001	26346	751	759	35	0.002172	0.02079		VIT_12s0028g00860	GSVIVG01020834001	26346	517	206	8	0.02099	0.1881								-	Vitis vinifera
	Trihelix		GSVIVG01011168001	26346	678	759	32	0.002573	0.02377		VIT_13s0019g05240	GSVIVG01016175001	26346	527	206	8	0.02339	0.1975
VIT_08s0007g01540	MYB		GSVIVG01034041001	26346	167	759	11	0.003388	0.03027		VIT_04s0008g06000	GSVIVG01035911001	26346	2747	206	30	0.0236	0.1975
	BHLH		GSVIVG01020814001	26346	700	759	32	0.004183	0.03616			GSVIVG01037712001	26346	1736	206	20	0.03125	0.253								DNA-binding transcription factor	Vitis vinifera
VIT_07s0141g00100	MYB		GSVIVG01004851001	26346	1444	759	58	0.004518	0.03784		VIT_18s0001g01760	GSVIVG01008806001	26346	1756	206	20	0.03472	0.2682
	MYB		GSVIVG01031341001	26346	1759	759	68	0.00574	0.04662		VIT_08s0007g07810	GSVIVG01033356001	26346	660	206	9	0.03545	0.2682
	TCP14		GSVIVG01008023001	26346	1469	759	58	0.006433	0.04979		VIT_01s0026g01910	GSVIVG01020038001	26346	949	206	12	0.03633	0.2682								homeodomain transcription factor	Vitis vinifera
	LFY		GSVIVG01008655001	26346	159	759	10	0.006503	0.04979		VIT_12s0028g03350	GSVIVG01020578001	26346	239	206	4	0.04018	0.2696
VIT_05s0049g01020	MYB		GSVIVG01027811001	26346	2515	759	92	0.007392	0.05503		VIT_15s0046g02190	GSVIVG01026965001	26346	320	206	5	0.04049	0.2696
	SBP		GSVIVG01018204001	26346	191	759	11	0.009645	0.06986		VIT_18s0001g13730	GSVIVG01009845001	26346	5654	206	54	0.04233	0.2696								-	Vitis vinifera
VIT_17s0000g08550	MYB		GSVIVG01007731001	26346	128	759	8	0.01192	0.0841		VIT_04s0023g01880	GSVIVG01018947001	26346	324	206	5	0.04257	0.2696
	TCP		GSVIVG01008109001	26346	967	759	39	0.01462	0.1005			GSVIVG01002195001	26346	692	206	9	0.04628	0.2696
VIT_07s0005g02570	WRKY		GSVIVG01028244001	26346	252	759	13	0.01503	0.1007		VIT_00s0341g00070	GSVIVG01006277001	26346	692	206	9	0.04628	0.2696								basic leucine zipper transcription factor	Vitis vinifera
VIT_18s0076g00330	BZIP		GSVIVG01034897001	26346	383	759	18	0.016	0.1016		VIT_09s0054g00440	GSVIVG01029593001	26346	1924	206	21	0.04704	0.2696
	MYB		GSVIVG01003966001	26346	771	759	32	0.01615	0.1016		VIT_00s0340g00090	GSVIVG01006269001	26346	2257	206	24	0.04861	0.2696
	BHLH		GSVIVG01023585001	26346	603	759	26	0.01667	0.1016			GSVIVG01015037001	26346	1300	206	15	0.04947	0.2696								DNA-binding transcription factor	Vitis vinifera
	TCP		GSVIVG01027588001	26346	1574	759	59	0.01667	0.1016
VIT_18s0122g00380	SBP	SPL14	GSVIVG01013452001	26346	207	759	11	0.0173	0.103
VIT_19s0014g02200	NAC		GSVIVG01014287001	26346	338	759	16	0.01942	0.107																	DNA-binding transcription factor	Vitis vinifera
VIT_00s1352g00010	MYB		GSVIVG01004464001	26346	1557	759	58	0.01949	0.107		deleted 16 repeated genes 23 gene			23 genes
VIT_18s0001g05250	ERF		GSVIVG01009007001	26346	784	759	32	0.02003	0.107		VIT_18s0001g13320	VITVI|EnsemblGenome=VIT_09s0054g00440|UniProtKB=F6GYN7	VIT_09s0054g00440	Uncharacterized protein	GATA TRANSCRIPTION FACTOR 28 (PTHR46125:SF5)	DNA-binding transcription factor	Vitis vinifera
VIT_07s0031g00190	ERF		GSVIVG01022076001	26346	842	759	34	0.02005	0.107					VIT_09s0054g00440												-	Vitis vinifera
VIT_07s0005g03030	LBD		GSVIVG01028295001	26346	585	759	25	0.02015	0.107		VIT_12s0035g02020			ortholog
VIT_11s0016g01890	MYB_related		GSVIVG01015170001	26346	843	759	34	0.02037	0.107				2	VITVI|EnsemblGenome=VIT_04s0008g02710|UniProtKB=D7SU40	VIT_04s0008g02710	NAC domain-containing protein	NAC DOMAIN-CONTAINING PROTEIN (PTHR31744:SF115)	-	Vitis vinifera
VIT_08s0056g00800	MYB		GSVIVG01029904001	26346	1596	759	59	0.02143	0.1095							VIT_04s0008g02710										-	Vitis vinifera
	NAC		GSVIVG01033372001	26346	290	759	14	0.02169	0.1095		VIT_18s0001g05890					ortholog
VIT_05s0020g02160	SBP		GSVIVG01017835001	26346	190	759	10	0.02226	0.1095				3	VITVI|EnsemblGenome=VIT_15s0021g01610|UniProtKB=D7SLY1	VIT_15s0021g01610	AP2/ERF domain-containing protein	ETHYLENE-RESPONSIVE TRANSCRIPTION FACTOR 13 (PTHR31190:SF199)	-	Vitis vinifera
VIT_02s0025g02610	bHLH		GSVIVG01019659001	26346	344	759	16	0.02257	0.1095							VIT_15s0021g01610										DNA-binding transcription factor	Vitis vinifera
VIT_15s0046g03190	MYB		GSVIVG01026868001	26346	1058	759	41	0.02319	0.1095		VIT_08s0040g00240					ortholog
	MYB		GSVIVG01023527001	26346	372	759	17	0.02329	0.1095				4	VITVI|EnsemblGenome=VIT_01s0011g04260|UniProtKB=D7T8Y6	VIT_01s0011g04260	Uncharacterized protein	PROTEIN TIS11 (PTHR12547:SF18)	RNA metabolism protein	Vitis vinifera
VIT_12s0028g03050	NAC		GSVIVG01020609001	26346	623	759	26	0.02409	0.1113							VIT_01s0011g04260										-	Vitis vinifera
	MADS8		GSVIVG01027579001	26346	10323	759	323	0.02482	0.1128							ortholog
VIT_18s0001g08380	TALE		GSVIVG01009273001	26346	5809	759	189	0.02577	0.115		VIT_15s0021g01610		5	VITVI|EnsemblGenome=VIT_18s0001g05890|UniProtKB=A5BSM2	VIT_18s0001g05890	AP2/ERF domain-containing protein	ETHYLENE-RESPONSIVE TRANSCRIPTION FACTOR ERF021 (PTHR31985:SF111)	DNA-binding transcription factor	Vitis vinifera
VIT_18s0072g01060	NAC		GSVIVG01034485001	26346	271	759	13	0.02618	0.115							VIT_18s0001g05890										-	Vitis vinifera
VIT_13s0067g02900	bZIP		GSVIVG01032683001	26346	493	759	21	0.02956	0.1277							ortholog
VIT_19s0085g00050	MYB		GSVIVG01036802001	26346	1381	759	51	0.03002	0.1277				6	VITVI|EnsemblGenome=VIT_04s0023g01880|UniProtKB=F6GWV8	VIT_04s0023g01880	Uncharacterized protein	ZF-HD DIMERIZATION-TYPE DOMAIN-CONTAINING PROTEIN (PTHR31948:SF119)	-	Vitis vinifera
VIT_18s0001g02300	NAC		GSVIVG01008839001	26346	278	759	13	0.03154	0.131							VIT_04s0023g01880										basic helix-loop-helix transcription factor	Vitis vinifera
	LBD		GSVIVG01032415001	26346	2801	759	96	0.03185	0.131		VIT_05s0077g01860					ortholog
VIT_01s0026g02600	MYB		GSVIVG01019967001	26346	105	759	6	0.03226	0.131		VIT_04s0079g00280		7	VITVI|EnsemblGenome=VIT_10s0003g02070|UniProtKB=D7TJT8	VIT_10s0003g02070	Uncharacterized protein	FLORAL HOMEOTIC PROTEIN AGAMOUS (PTHR11945:SF741)	MADS box transcription factor	Vitis vinifera
VIT_18s0072g00670	Trihelix		GSVIVG01034523001	26346	503	759	21	0.03569	0.1427							VIT_10s0003g02070										-	Vitis vinifera
VIT_10s0003g00420	arf		GSVIVG01021128001	26346	257	759	12	0.03621	0.1427		VIT_09s0018g00240					ortholog
VIT_01s0010g02230	ARRB		GSVIVG01010300001	26346	108	759	6	0.03676	0.1428		VIT_10s0003g02070		8	VITVI|EnsemblGenome=VIT_00s0340g00090|UniProtKB=D7SSJ3	VIT_00s0340g00090	LOB domain-containing protein	PROTEIN ASYMMETRIC LEAVES 2 (PTHR31301:SF83)	-	Vitis vinifera
VIT_08s0007g00180	Dof		GSVIVG01034189001	26346	7082	759	225	0.03822	0.1458							VIT_00s0340g00090										homeodomain transcription factor	Vitis vinifera
VIT_18s0001g01820	NAC		GSVIVG01013671001	26346	479	759	20	0.03863	0.1458		VIT_01s0011g04260					ortholog
	G2-like		GSVIVG01030315001	26346	261	759	12	0.04017	0.1492				9	VITVI|EnsemblGenome=VIT_09s0018g00240|UniProtKB=F6HBV8	VIT_09s0018g00240	WRKY domain-containing protein	WRKY TRANSCRIPTION FACTOR 40-RELATED (PTHR31429:SF3)	DNA-binding transcription factor	Vitis vinifera
VIT_07s0005g01210	MYB		GSVIVG01028091001	26346	184	759	9	0.04109	0.1492		VIT_04s0008g02710					VIT_09s0018g00240										-	Vitis vinifera
VIT_07s0197g00060	G2-like		GSVIVG01003551001	26346	262	759	12	0.04121	0.1492		VIT_13s0067g01630					ortholog
	ERF		GSVIVG01011902001	26346	2006	759	70	0.04182	0.1493		VIT_12s0028g00860		10	VITVI|EnsemblGenome=VIT_04s0008g06000|UniProtKB=F6H3U5	VIT_04s0008g06000	AP2/ERF domain-containing protein	ETHYLENE-RESPONSIVE TRANSCRIPTION FACTOR ERF003 (PTHR31194:SF61)	DNA-binding transcription factor	Vitis vinifera
VIT_15s0021g02690	bHLH		GSVIVG01018165001	26346	571	759	23	0.0431	0.1493		VIT_13s0019g05240					ERF045										DNA-binding transcription factor	Vitis vinifera
VIT_04s0023g01430	C2H2		GSVIVG01019000001	26346	747	759	29	0.04344	0.1493		VIT_04s0008g06000					ortholog
VIT_14s0108g00980	DOF		GSVIVG01011433001	26346	318	759	14	0.04344	0.1493				11	VITVI|EnsemblGenome=VIT_00s0341g00070|UniProtKB=D7SZ01	VIT_00s0341g00070	AP2/ERF domain-containing protein	ETHYLENE-RESPONSIVE TRANSCRIPTION FACTOR ERF034 (PTHR31985:SF130)	DNA-binding transcription factor	Vitis vinifera
VIT_08s0007g06160	bZIP		GSVIVG01033531001	26346	351	759	15	0.04896	0.1661		VIT_18s0001g01760					VIT_00s0341g00070										-	Vitis vinifera
											VIT_08s0007g07810					ortholog
											VIT_01s0026g01910		12	VITVI|EnsemblGenome=VIT_13s0019g05240|UniProtKB=D7TM22	VIT_13s0019g05240	NAC domain-containing protein	NAC DOMAIN-CONTAINING PROTEIN 53 (PTHR31989:SF46)	-	Vitis vinifera
																VIT_13s0019g05240										-	Vitis vinifera
											VIT_15s0046g02190					ortholog
													13	VITVI|EnsemblGenome=VIT_08s0007g07810|UniProtKB=A5AWW8	VIT_08s0007g07810	BHLH domain-containing protein	BHLH DOMAIN-CONTAINING PROTEIN (PTHR16223:SF236)	basic helix-loop-helix transcription factor	Vitis vinifera
											VIT_04s0023g01880					VIT_08s0007g07810										-	Vitis vinifera
TF annotation																ortholog
Gene ID	Mapped IDs										VIT_00s0341g00070		14	VITVI|EnsemblGenome=VIT_12s0035g02020|UniProtKB=F6HJY7	VIT_12s0035g02020	NAC domain-containing protein	OS01G0888300 PROTEIN (PTHR31744:SF79)	-	Vitis vinifera
		Gene Name	PANTHER Family/Subfamily	PANTHER Protein Class	Species						VIT_09s0054g00440					VIT_12s0035g02020										DNA-binding transcription factor	Vitis vinifera
		Gene Symbol									VIT_00s0340g00090					ortholog
													15	VITVI|EnsemblGenome=VIT_13s0067g01630|UniProtKB=D7UD27	VIT_13s0067g01630	Uncharacterized protein	TRANSCRIPTION FACTOR MYB65 (PTHR47995:SF18)	DNA-binding transcription factor	Vitis vinifera
		Ortholog														VIT_13s0067g01630
																ortholog
	1	VITVI|EnsemblGenome=VIT_08s0007g01540|UniProtKB=D7THE0	VIT_08s0007g01540	Uncharacterized protein	MYB TRANSCRIPTION FACTOR-LIKE PROTEIN (PTHR45614:SF150)	-	Vitis vinifera						16	VITVI|EnsemblGenome=VIT_18s0001g01760|UniProtKB=Q0HA25	VIT_18s0001g01760	Agamous-like MADS-box protein MADS9	FLORAL HOMEOTIC PROTEIN PISTILLATA (PTHR48019:SF76)	-	Vitis vinifera
				VIT_08s0007g01540												MADS9
				ortholog												ortholog
	2	VITVI|EnsemblGenome=VIT_04s0023g01360|UniProtKB=D7SPH9	VIT_04s0023g01360	BZIP domain-containing protein	G-BOX-BINDING FACTOR 1 (PTHR45967:SF20)	-	Vitis vinifera						17	VITVI|EnsemblGenome=VIT_18s0001g13320|UniProtKB=E0CPG1	VIT_18s0001g13320	AP2/ERF domain-containing protein	DEHYDRATION-RESPONSIVE ELEMENT-BINDING PROTEIN 2E (PTHR31241:SF69)	-	Vitis vinifera
				VIT_04s0023g01360												VIT_18s0001g13320
				ortholog												ortholog
	3	VITVI|EnsemblGenome=VIT_17s0000g04790|UniProtKB=D7SIP8	VIT_17s0000g04790	BHLH domain-containing protein	BHLH DOMAIN-CONTAINING PROTEIN (PTHR46412:SF3)	basic helix-loop-helix transcription factor	Vitis vinifera						18	VITVI|EnsemblGenome=VIT_15s0046g02190|UniProtKB=D7UCE2	VIT_15s0046g02190	WRKY domain-containing protein	ADP-RIBOSYL CYCLASE/CYCLIC ADP-RIBOSE HYDROLASE-RELATED (PTHR32096:SF61)	DNA-binding transcription factor	Vitis vinifera
				VIT_17s0000g04790												VIT_15s0046g02190
				ortholog												ortholog
	4	VITVI|EnsemblGenome=VIT_14s0108g00980|UniProtKB=F6H5U5	VIT_14s0108g00980	Dof-type domain-containing protein	CYCLIC DOF FACTOR 2 (PTHR31089:SF1)	-	Vitis vinifera						19	VITVI|EnsemblGenome=VIT_12s0028g00860|UniProtKB=E0CU17	VIT_12s0028g00860	NAC domain-containing protein	TRANSCRIPTION FACTOR JUNGBRUNNEN 1 (PTHR31744:SF65)	-	Vitis vinifera
				VIT_14s0108g00980												VIT_12s0028g00860
				ortholog												ortholog
	5	VITVI|EnsemblGenome=VIT_05s0020g02160|UniProtKB=F6HDJ0	VIT_05s0020g02160	SBP-type domain-containing protein	SQUAMOSA PROMOTER-BINDING-LIKE PROTEIN 7 (PTHR31251:SF108)	-	Vitis vinifera						20	VITVI|EnsemblGenome=VIT_05s0077g01860|UniProtKB=D7SYA3	VIT_05s0077g01860	AP2/ERF domain-containing protein	ETHYLENE-RESPONSIVE TRANSCRIPTION FACTOR RAP2-3 (PTHR31190:SF142)	-	Vitis vinifera
				VIT_05s0020g02160												VIT_05s0077g01860
				ortholog												ortholog
	6	VITVI|EnsemblGenome=VIT_08s0007g00180|UniProtKB=F6HLD4	VIT_08s0007g00180	Dof-type domain-containing protein	OS03G0821200 PROTEIN (PTHR31992:SF227)	-	Vitis vinifera						21	VITVI|EnsemblGenome=VIT_04s0079g00280|UniProtKB=F6HFV8	VIT_04s0079g00280	NAC domain-containing protein	NAC DOMAIN-CONTAINING PROTEIN (PTHR31989:SF6)	-	Vitis vinifera
				VIT_08s0007g00180												VIT_04s0079g00280
				ortholog												ortholog
	7	VITVI|EnsemblGenome=VIT_14s0083g01060|UniProtKB=D7SMN9	VIT_14s0083g01060	Uncharacterized protein	MYB TRANSCRIPTION FACTOR (PTHR45675:SF17)	DNA-binding transcription factor	Vitis vinifera						22	VITVI|EnsemblGenome=VIT_08s0040g00240|UniProtKB=D7TQ66	VIT_08s0040g00240	Uncharacterized protein	HERMAPHRODITE, ISOFORM A-RELATED (PTHR24388:SF54)	C2H2 zinc finger transcription factor	Vitis vinifera
				VIT_14s0083g01060												VIT_08s0040g00240
				ortholog												ortholog
	8	VITVI|EnsemblGenome=VIT_18s0001g05250|UniProtKB=F6H0W0	VIT_18s0001g05250	AP2/ERF domain-containing protein	AP2/ERF DOMAIN-CONTAINING PROTEIN (PTHR31657:SF62)	DNA-binding transcription factor	Vitis vinifera						23	VITVI|EnsemblGenome=VIT_01s0026g01910|UniProtKB=D7TNB9	VIT_01s0026g01910	Uncharacterized protein	TRANSCRIPTION FACTOR MYB124 (PTHR45614:SF76)	-	Vitis vinifera
				VIT_18s0001g05250												VIT_01s0026g01910
				ortholog												ortholog
	9	VITVI|EnsemblGenome=VIT_14s0060g00260|UniProtKB=F6I4I6	VIT_14s0060g00260	BHLH domain-containing protein	TRANSCRIPTION FACTOR PIF3 (PTHR46807:SF1)	DNA-binding transcription factor	Vitis vinifera
				VIT_14s0060g00260
				ortholog
	10	VITVI|EnsemblGenome=VIT_05s0077g01240|UniProtKB=D7SY49	VIT_05s0077g01240	Uncharacterized protein	CALMODULIN-BINDING TRANSCRIPTION ACTIVATOR 6 (PTHR23335:SF3)	DNA-binding transcription factor	Vitis vinifera
				VIT_05s0077g01240
				ortholog
	11	VITVI|EnsemblGenome=VIT_13s0175g00120|UniProtKB=F6I758	VIT_13s0175g00120	BZIP domain-containing protein	BZIP DOMAIN-CONTAINING PROTEIN (PTHR22952:SF454)	basic leucine zipper transcription factor	Vitis vinifera
				VIT_13s0175g00120
				ortholog
	12	VITVI|EnsemblGenome=VIT_18s0001g08600|UniProtKB=E0CNY1	VIT_18s0001g08600	BHLH domain-containing protein	TRANSCRIPTION FACTOR BHLH74 (PTHR12565:SF312)	-	Vitis vinifera
				VIT_18s0001g08600
				ortholog
	13	VITVI|EnsemblGenome=VIT_13s0067g02900|UniProtKB=F6HC81	VIT_13s0067g02900	BZIP domain-containing protein	BZIP TRANSCRIPTION FACTOR 18 (PTHR13690:SF103)	DNA-binding transcription factor	Vitis vinifera
				VIT_13s0067g02900
				ortholog
	14	VITVI|EnsemblGenome=VIT_01s0010g00930|UniProtKB=D7TAA5	VIT_01s0010g00930	BZIP domain-containing protein	BZIP DOMAIN-CONTAINING PROTEIN (PTHR46324:SF26)	basic leucine zipper transcription factor	Vitis vinifera
				VIT_01s0010g00930
				ortholog
	15	VITVI|EnsemblGenome=VIT_07s0031g00190|UniProtKB=A6XA90	VIT_07s0031g00190	AP2/ERF domain-containing protein	ETHYLENE-RESPONSIVE TRANSCRIPTION FACTOR RAP2-1-RELATED (PTHR31729:SF2)	DNA-binding transcription factor	Vitis vinifera
				VIT_07s0031g00190
				ortholog
	16	VITVI|EnsemblGenome=VIT_18s0072g00670|UniProtKB=F6GY30	VIT_18s0072g00670	Uncharacterized protein	TRIHELIX TRANSCRIPTION FACTOR DF1 (PTHR21654:SF59)	-	Vitis vinifera
				VIT_18s0072g00670
				ortholog
	17	VITVI|EnsemblGenome=VIT_11s0016g01890|UniProtKB=D7TCM4	VIT_11s0016g01890	MYB transcription factor	H15 DOMAIN-CONTAINING PROTEIN (PTHR11467:SF136)	histone	Vitis vinifera
				VIT_11s0016g01890
				ortholog
	18	VITVI|EnsemblGenome=VIT_07s0005g02570|UniProtKB=F6HZF7	VIT_07s0005g02570	WRKY domain-containing protein	WRKY TRANSCRIPTION FACTOR 47-RELATED (PTHR31429:SF59)	DNA-binding transcription factor	Vitis vinifera
				VIT_07s0005g02570
				ortholog
	19	VITVI|EnsemblGenome=VIT_05s0049g01020|UniProtKB=A5BKG2	VIT_05s0049g01020	MYB15	TRANSCRIPTION FACTOR MYB4 (PTHR10641:SF1134)	homeodomain transcription factor	Vitis vinifera
				MYB
				ortholog
	20	VITVI|EnsemblGenome=VIT_08s0105g00170|UniProtKB=D7SXZ7	VIT_08s0105g00170	Dof-type domain-containing protein	DOF ZINC FINGER PROTEIN DOF3.5 (PTHR31992:SF111)	-	Vitis vinifera
				VIT_08s0105g00170
				ortholog
	21	VITVI|EnsemblGenome=VIT_14s0030g02200|UniProtKB=F6HTR1	VIT_14s0030g02200	BZIP domain-containing protein	BASIC LEUCINE ZIPPER 63 (PTHR46408:SF10)	basic leucine zipper transcription factor	Vitis vinifera
				VIT_14s0030g02200
				ortholog
	22	VITVI|EnsemblGenome=VIT_07s0197g00060|UniProtKB=F6H7R1	VIT_07s0197g00060	HTH myb-type domain-containing protein	TRANSCRIPTION FACTOR HHO6 (PTHR31003:SF3)	DNA-binding transcription factor	Vitis vinifera
				VIT_07s0197g00060
				ortholog
	23	VITVI|EnsemblGenome=VIT_17s0000g08550|UniProtKB=D7SHQ6	VIT_17s0000g08550	Uncharacterized protein	TRANSCRIPTION FACTOR MYB98 (PTHR45614:SF154)	-	Vitis vinifera
				VIT_17s0000g08550
				ortholog
	24	VITVI|EnsemblGenome=VIT_07s0031g00450|UniProtKB=D7SVW1	VIT_07s0031g00450	BHLH domain-containing protein	TRANSCRIPTION FACTOR SPATULA (PTHR45855:SF6)	DNA-binding transcription factor	Vitis vinifera
				VIT_07s0031g00450
				ortholog
	25	VITVI|EnsemblGenome=VIT_00s1352g00010|UniProtKB=D7UEC5	VIT_00s1352g00010	Uncharacterized protein	TRANSCRIPTION FACTOR RAX3 (PTHR48000:SF45)	-	Vitis vinifera
				VIT_00s1352g00010
				ortholog
	26	VITVI|EnsemblGenome=VIT_18s0122g00380|UniProtKB=F6I6X1	VIT_18s0122g00380	SBP-type domain-containing protein	SQUAMOSA PROMOTER-BINDING-LIKE PROTEIN 14 (PTHR31251:SF110)	-	Vitis vinifera
				VIT_18s0122g00380
				ortholog
	27	VITVI|EnsemblGenome=VIT_04s0008g05210|UniProtKB=A5BJR5	VIT_04s0008g05210	BZIP domain-containing protein	TRANSCRIPTIONAL ACTIVATOR HAC1 (PTHR46714:SF6)	DNA-binding transcription factor	Vitis vinifera
				HY5
				ortholog
	28	VITVI|EnsemblGenome=VIT_07s0005g01210|UniProtKB=D7U2G1	VIT_07s0005g01210	Uncharacterized protein	OS01G0305900 PROTEIN (PTHR47999:SF6)	DNA-binding transcription factor	Vitis vinifera
				VIT_07s0005g01210
				ortholog
	29	VITVI|EnsemblGenome=VIT_01s0011g06380|UniProtKB=F6HFA4	VIT_01s0011g06380	Uncharacterized protein	PROTEIN BASIC PENTACYSTEINE1-RELATED (PTHR31421:SF21)	-	Vitis vinifera
				VIT_01s0011g06380
				ortholog
	30	VITVI|EnsemblGenome=VIT_18s0072g01060|UniProtKB=D7SR91	VIT_18s0072g01060	NAC domain-containing protein	NAC DOMAIN-CONTAINING PROTEIN 30 (PTHR31989:SF363)	-	Vitis vinifera
				VIT_18s0072g01060
				ortholog
	31	VITVI|EnsemblGenome=VIT_01s0010g02230|UniProtKB=D7TAK2	VIT_01s0010g02230	Two-component response regulator	TWO-COMPONENT RESPONSE REGULATOR ARR11 (PTHR43874:SF137)	winged helix/forkhead transcription factor	Vitis vinifera
				VIT_01s0010g02230
				ortholog
	32	VITVI|EnsemblGenome=VIT_08s0007g06160|UniProtKB=F6HLL2	VIT_08s0007g06160	Uncharacterized protein	TRANSCRIPTION FACTOR TGA10 (PTHR45693:SF13)	DNA-binding transcription factor	Vitis vinifera
				VIT_08s0007g06160
				ortholog
	33	VITVI|EnsemblGenome=VIT_18s0001g01820|UniProtKB=D7TFR5	VIT_18s0001g01820	NAC domain-containing protein	NAC DOMAIN-CONTAINING PROTEIN 17 (PTHR31989:SF205)	-	Vitis vinifera
				VIT_18s0001g01820
				ortholog
	34	VITVI|EnsemblGenome=VIT_07s0005g03030|UniProtKB=D7U2X2	VIT_07s0005g03030	LOB domain-containing protein	LOB DOMAIN-CONTAINING PROTEIN 16 (PTHR31529:SF23)	-	Vitis vinifera
				VIT_07s0005g03030
				ortholog
	35	VITVI|EnsemblGenome=VIT_02s0012g02250|UniProtKB=D7TTQ2	VIT_02s0012g02250	BZIP domain-containing protein	BZIP TRANSCRIPTION FACTOR 68 (PTHR45967:SF2)	-	Vitis vinifera
				VIT_02s0012g02250
				ortholog
	36	VITVI|EnsemblGenome=VIT_18s0001g02300|UniProtKB=F6H0K2	VIT_18s0001g02300	NAC domain-containing protein	NAC DOMAIN-CONTAINING PROTEIN 2 (PTHR31719:SF183)	DNA-binding transcription factor	Vitis vinifera
				VIT_18s0001g02300
				ortholog
	37	VITVI|EnsemblGenome=VIT_01s0026g02600|UniProtKB=F6HPQ3	VIT_01s0026g02600	Uncharacterized protein	MYB DOMAIN PROTEIN 89-RELATED (PTHR45614:SF175)	-	Vitis vinifera
				VIT_01s0026g02600
				ortholog
	38	VITVI|EnsemblGenome=VIT_07s0141g00100|UniProtKB=D7TYQ5	VIT_07s0141g00100	Uncharacterized protein	OS06G0221000 PROTEIN (PTHR10641:SF1311)	homeodomain transcription factor	Vitis vinifera
				VIT_07s0141g00100
				ortholog
	39	VITVI|EnsemblGenome=VIT_12s0028g03350|UniProtKB=E0CTG4	VIT_12s0028g03350	SBP-type domain-containing protein	SQUAMOSA PROMOTER-BINDING-LIKE PROTEIN (PTHR31251:SF149)	-	Vitis vinifera
				VIT_12s0028g03350
				ortholog
	40	VITVI|EnsemblGenome=VIT_15s0046g03190|UniProtKB=D7UC60	VIT_15s0046g03190	Uncharacterized protein	TRANSCRIPTION FACTOR MYB17 (PTHR10641:SF622)	homeodomain transcription factor	Vitis vinifera
				VIT_15s0046g03190
				ortholog
	41	VITVI|EnsemblGenome=VIT_08s0056g00800|UniProtKB=B3VTV7	VIT_08s0056g00800	Transcription factor MYB60	TRANSCRIPTION FACTOR MYB60 (PTHR10641:SF1152)	homeodomain transcription factor	Vitis vinifera
				MYB60
				ortholog
	42	VITVI|EnsemblGenome=VIT_04s0023g01430|UniProtKB=F6GWY3	VIT_04s0023g01430	C2H2-type domain-containing protein	ZINC FINGER PROTEIN GAI-ASSOCIATED FACTOR 1 (PTHR10593:SF207)	non-receptor serine/threonine protein kinase	Vitis vinifera
				VIT_04s0023g01430
				ortholog
	43	VITVI|EnsemblGenome=VIT_19s0085g00050|UniProtKB=D7T0Y3	VIT_19s0085g00050	Uncharacterized protein	TRANSCRIPTION FACTOR MYB72 (PTHR10641:SF1103)	homeodomain transcription factor	Vitis vinifera
				VIT_19s0085g00050
				ortholog
	44	VITVI|EnsemblGenome=VIT_15s0046g01440|UniProtKB=D7UCK3	VIT_15s0046g01440	BZIP domain-containing protein	G-BOX-BINDING FACTOR 3 (PTHR45967:SF1)	-	Vitis vinifera
				VIT_15s0046g01440
				ortholog
	45	VITVI|EnsemblGenome=VIT_15s0021g02690|UniProtKB=F6GV58	VIT_15s0021g02690	BHLH domain-containing protein	TRANSCRIPTION FACTOR UNE10 (PTHR45855:SF23)	DNA-binding transcription factor	Vitis vinifera
				VIT_15s0021g02690
				ortholog
	46	VITVI|EnsemblGenome=VIT_02s0025g02610|UniProtKB=F6HU75	VIT_02s0025g02610	BHLH domain-containing protein	BHLH DOMAIN-CONTAINING PROTEIN (PTHR11514:SF115)	-	Vitis vinifera
				VIT_02s0025g02610
				ortholog
	47	VITVI|EnsemblGenome=VIT_19s0014g02200|UniProtKB=F6H219	VIT_19s0014g02200	NAC domain-containing protein	PROTEIN CUP-SHAPED COTYLEDON 2 (PTHR31744:SF114)	-	Vitis vinifera
				VIT_19s0014g02200
				ortholog
	48	VITVI|EnsemblGenome=VIT_18s0001g08380|UniProtKB=F6H159	VIT_18s0001g08380	Uncharacterized protein	HOMEOBOX PROTEIN KNOTTED-1-LIKE 12 (PTHR11850:SF102)	homeodomain transcription factor	Vitis vinifera
				VIT_18s0001g08380
				ortholog
	49	VITVI|EnsemblGenome=VIT_18s0001g13730|UniProtKB=B2Z458	VIT_18s0001g13730	GAGA-binding transcriptional activator BBR/BPC6-like	PROTEIN BASIC PENTACYSTEINE6 (PTHR31421:SF2)	-	Vitis vinifera
				VIT_18s0001g13730
				ortholog
	50	VITVI|EnsemblGenome=VIT_10s0003g00420|UniProtKB=F6HM45	VIT_10s0003g00420	Auxin response factor	AUXIN RESPONSE FACTOR 3 (PTHR31384:SF5)	-	Vitis vinifera
				VIT_10s0003g00420
				ortholog
	51	VITVI|EnsemblGenome=VIT_01s0010g00540|UniProtKB=D7TA75	VIT_01s0010g00540	BHLH domain-containing protein	TRANSCRIPTION FACTOR BIM2 (PTHR46412:SF6)	basic helix-loop-helix transcription factor	Vitis vinifera
				VIT_01s0010g00540
				ortholog
	52	VITVI|EnsemblGenome=VIT_08s0007g03420|UniProtKB=F6HKK4	VIT_08s0007g03420	BZIP domain-containing protein	PROTEIN ABSCISIC ACID-INSENSITIVE 5 (PTHR22952:SF175)	basic leucine zipper transcription factor	Vitis vinifera
				VIT_08s0007g03420
				ortholog
	53	VITVI|EnsemblGenome=VIT_12s0028g03050|UniProtKB=E0CTJ0	VIT_12s0028g03050	NAC domain-containing protein	NAC DOMAIN-CONTAINING PROTEIN 73 (PTHR31079:SF46)	-	Vitis vinifera
				VIT_12s0028g03050
				ortholog
	54	VITVI|EnsemblGenome=VIT_07s0005g02260|UniProtKB=F6HZE3	VIT_07s0005g02260	SBP-type domain-containing protein	SQUAMOSA PROMOTER-BINDING-LIKE PROTEIN (PTHR31251:SF149)	-	Vitis vinifera
				VIT_07s0005g02260
				ortholog
	55	VITVI|EnsemblGenome=VIT_18s0076g00330|UniProtKB=F6GYV2	VIT_18s0076g00330	BZIP domain-containing protein	BASIC-LEUCINE ZIPPER (BZIP) TRANSCRIPTION FACTOR FAMILY PROTEIN-RELATED (PTHR13690:SF86)	DNA-binding transcription factor	Vitis vinifera
				VIT_18s0076g00330
				ortholog
	56	VITVI|EnsemblGenome=VIT_14s0060g01210|UniProtKB=D7UA29	VIT_14s0060g01210	BZIP domain-containing protein	BASIC LEUCINE ZIPPER 1 (PTHR45764:SF31)	DNA-binding transcription factor	Vitis vinifera
				VIT_14s0060g01210
				ortholog
