# Supplementary material for: Transcriptional profiling of two muscadine grape cultivars “Carlos” and “Noble” to reveal new genes, gene regulatory networks, and pathways that involved in grape berry ripening
Source: Front Plant Sci. 2022 Aug 11;13:949383. doi: 10.3389/fpls.2022.949383 (PMC9435441; doi:10.3389/fpls.2022.949383)
Supplement: SUPPLEMENTARY TABLE 5 — RNA-seq data were grouped into nine different clusters using k-mean analysis. [file Table_5.XLSX]

## Sheet: heatmap_values
	S5-CARLOS-ave	S5-NOB-ave	S6-CARLOS-ave	S6-NOB-ave	S7-CARLOS-ave	S7-NOB-ave
VIT_12s0028g01180	-5.05889	7.06605	13.5456	12.0834	8.19139	12.225
VIT_14s0128g00200	-5.22882	6.28145	13.4972	12.3684	10.1598	11.3349
VIT_19s0177g00090	-2.20645	11.0451	14.0622	12.9742	5.74066	11.5958
VIT_07s0005g03410	-3.09954	9.63683	14.2803	12.6379	7.43176	11.5197
VIT_07s0005g03420	-2.25154	10.4351	14.5735	12.9661	8.2656	12.1875
VIT_19s0090g01340	8.82827	10.7702	12.9104	13.977	14.794	13.8188
VIT_06s0004g02560	-2.20645	7.65086	12.5917	11.0388	13.2241	13.5442
VIT_01s0011g05140	5.22689	8.20374	12.3729	12.3298	12.9605	13.2131
VIT_01s0011g05110	5.16404	8.35466	12.8472	12.5989	13.2472	13.581
VIT_07s0151g00640	1.05195	7.84766	13.6004	13.0048	11.2336	12.0522
VIT_04s0079g00690	2.488	8.04979	12.2642	12.759	12.8704	12.8626
VIT_05s0049g00520	0.751321	8.9786	12.3307	13.3087	14.1388	14.0745
VIT_14s0081g00030	1.25701	9.46657	12.1999	13.9483	14.3717	12.8813
VIT_05s0049g00760	-5.64386	4.31445	-1.14136	9.28909	9.38576	-1.06895
VIT_04s0008g04060	-1	8.12129	-1.38333	10.435	10.604	0.0473057
VIT_06s0004g05400	2.79563	4.77523	0.600904	8.28643	10.3349	-2.52838
VIT_06s0004g05320	-0.263034	1.83458	-3.14136	5.11075	7.06052	-3.90689
VIT_06s0004g05330	-0.352302	1.74416	-3.8365	5.63042	7.44761	-3.70526
VIT_06s0004g05310	0.450661	2.3914	-1.52838	5.05629	7.60743	-2.09954
VIT_06s0004g05380	1.55582	2.45066	-1.80255	5.48478	7.4511	-1.51457
VIT_09s0002g01680	-0.162729	1.69004	-3.18442	-3.98089	-6.22882	-4.64386
VIT_08s0007g03220	0.698959	1.99518	-2.58496	-3.32193	-6.22882	-5.22882
VIT_02s0025g04000	-0.0340618	2.20059	-2.12029	-4.14136	-5.64386	-4.52838
VIT_10s0042g00830	-0.37707	1.94486	-2.25154	-2.98089	-5.90689	-4.14136
VIT_03s0088g01160	-1.01937	1.66751	-2.8365	-3.47393	-7.22882	-5.05889
VIT_15s0107g00320	-0.761213	2.23573	-3.42146	-3.22882	-7.22882	-4.22882
VIT_17s0000g09320	0.0332762	2.65535	-4.32193	-4.22882	-6.64386	-4.52838
VIT_08s0007g01600	-0.206451	0.159199	-3.64386	-3.58496	-6.64386	-3.8365
VIT_16s0039g02470	-0.263034	0.34861	-3.42146	-3.14136	-6.22882	-3.58496
VIT_01s0137g00750	-0.370838	0.468149	-3.76939	-4.14136	-6.22882	-4.42146
VIT_10s0003g02160	-0.628906	0.782409	-3.52838	-3.47393	-5.90689	-5.90689
VIT_12s0028g03360	-0.263034	0.961006	-3.8365	-4.90689	-3.76939	-5.90689
VIT_12s0057g01510	-0.570607	1.85067	-2.90689	-4.52838	-4.22882	-5.42146
VIT_19s0014g02030	-0.115077	0.771181	-3.37084	-5.05889	-4.76939	-4.76939
VIT_05s0020g02920	-1.44746	1.42044	-3.47393	-5.05889	-5.42146	-4.76939
VIT_11s0016g05360	1.44714	0.863938	-3.76939	-2.73697	-4.76939	-4.52838
VIT_07s0104g01270	1.44007	1.5008	-3.64386	-3.14136	-4.64386	-4.52838
VIT_08s0007g07930	2.32385	0.908172	-3.98089	-3.52838	-5.22882	-4.32193
VIT_18s0001g05860	1.08859	1.45066	-3.32193	-2.03899	-5.42146	-5.42146
VIT_14s0083g00700	1.31421	2.20581	-3.52838	-1.94342	-5.22882	-3.90689
VIT_12s0057g00240	0.549258	2.94048	-3.64386	-2.61411	-3.8365	-4.76939
VIT_06s0004g01730	0.725378	2.84866	-3.01937	-2.39593	-4.05889	-4.64386
VIT_19s0090g01600	0.607232	3.27003	-3.14136	-2.34618	-4.64386	-3.8365
VIT_08s0058g00540	0.695994	2.29474	-3.98089	-2.47393	-3.76939	-4.05889
VIT_17s0000g07440	1.58656	2.58816	-4.22882	-2.94342	-4.05889	-3.98089
VIT_11s0037g00880	-0.0242475	1.48714	-3.98089	-2.64386	-4.90689	-3.18442
VIT_05s0049g01720	0.246915	2.02739	-3.76939	-3.22882	-4.64386	-3.01937
VIT_19s0014g02500	-0.162729	1.33724	-5.22882	-2.61411	-5.42146	-3.64386
VIT_05s0020g00620	0.0749621	2.59932	-2.14136	-3.01937	-4.42146	-4.32193
VIT_04s0008g04260	1.51265	2.10769	-1.55639	-2.76939	-4.32193	-4.64386
VIT_16s0022g02030	1.20163	2.68781	-1.5009	-3.27462	-5.90689	-3.76939
VIT_01s0010g02070	-0.389615	1.18692	-0.697437	-3.52838	-5.05889	-4.52838
VIT_11s0065g00630	-0.0489096	2.13313	-2.34618	-1.68966	-5.64386	-3.01937
VIT_08s0007g00270	0.329602	3.41278	-1.42146	-1.57061	-6.22882	-3.8365
VIT_11s0065g00030	-1.30996	1.68407	-2.70526	-2.94342	-4.14136	-5.22882
VIT_03s0088g00490	-0.952694	2.56478	-3.01937	-2.5009	-4.22882	-5.05889
VIT_08s0007g06460	-0.943416	1.99277	-3.22882	-3.27462	-5.05889	-4.64386
VIT_09s0002g00800	-1.18442	1.68407	-2.37084	-2.18442	-4.76939	-4.05889
VIT_01s0010g00460	-1	1.78381	-3.27462	-2.32193	-3.98089	-4.05889
VIT_12s0034g02560	-1.00965	1.97085	-3.90689	-1.35845	-3.98089	-5.42146
VIT_11s0016g00460	-0.514573	2.53854	-2.80255	-1.94342	-3.14136	-3.37084
VIT_18s0001g08700	0.172061	2.83323	-2.34618	-2.05889	-3.32193	-3.18442
VIT_09s0002g03350	-0.434403	2.95853	-3.22882	-2.58496	-3.64386	-3.98089
VIT_08s0032g00640	-0.769387	2.30159	-1.80255	-3.05889	-2.8365	-3.09954
VIT_05s0049g01800	-1	2.76765	-1.72102	-1.02915	-3.32193	-3.32193
VIT_04s0044g01650	-0.980891	2.86063	-1.17354	-1.96203	-2.67423	-3.18442
VIT_03s0091g00550	-0.0790716	2.64155	-1.67423	-1.06895	-3.70526	-4.14136
VIT_05s0020g03640	0.728283	3.49143	-3.14136	-0.990414	-2.80255	-4.14136
VIT_06s0009g02090	-2.05889	2.31711	-2.39593	-1	-4.76939	-4.14136
VIT_02s0025g02650	-2.01937	1.65992	-1.51457	-1.92504	-3.76939	-3.18442
VIT_04s0023g01020	-1.17354	2.20997	-1.26303	0.0612002	-3.98089	-4.64386
VIT_13s0064g01400	-1.59946	3.86592	-1.96203	-0.713119	-4.64386	-2.76939
VIT_03s0038g02660	-0.643856	1.12653	-1.16273	-2.90689	-7.22882	-5.42146
VIT_09s0002g00360	0.146221	1.23061	-1.4344	-3.42146	-7.22882	-4.22882
VIT_16s0022g01620	0.768361	0.635367	-0.0841604	-3.37084	-7.22882	-4.64386
VIT_02s0025g01850	0.128733	0.77961	-0.234465	-2.37084	-7.22882	-4.52838
VIT_11s0118g00770	-0.141356	3.10657	-3.01937	-1.67423	-5.42146	-6.64386
VIT_14s0128g00460	-0.0193653	3.63421	-4.05889	-2.76939	-4.76939	-5.64386
VIT_08s0007g07490	0.918386	2.21101	-2.09954	-2.39593	-5.90689	-6.64386
VIT_07s0104g01120	1.64616	3.0948	-1.98089	-2.47393	-4.64386	-6.64386
VIT_07s0005g01030	1.72538	4.0658	-2.14136	-2.8365	-6.64386	-5.05889
VIT_13s0064g00560	1.72538	4.26354	-1.70526	-1.8365	-6.64386	-5.42146
VIT_10s0003g05680	-1.03899	1.95853	-3.32193	-3.76939	-7.22882	-7.22882
VIT_18s0001g14870	0.826464	1.32	-2.73697	-4.05889	-7.22882	-7.22882
VIT_05s0051g00050	2.49995	1.32	-4.05889	-2.94342	-6.22882	-8.22882
VIT_17s0000g08680	3.22805	2.92156	-2.80255	-2.44746	-5.42146	-8.22882
VIT_13s0019g02490	1.20163	-0.705257	-0.827939	-4.64386	-5.90689	-2.44746
VIT_06s0004g06670	0.759866	-0.00481702	-1.58496	-4.64386	-4.76939	-2.73697
VIT_10s0003g04510	0.259021	-1.02915	-1.25154	-3.64386	-4.42146	-2.09954
VIT_03s0091g01240	-0.321928	0.931053	-1.18442	-3.90689	-5.64386	-2.47393
VIT_16s0050g01600	0.519374	-0.606767	-2.70526	-4.76939	-5.64386	-3.32193
VIT_17s0000g08060	-0.68966	0.163499	-2.87127	-3.98089	-4.64386	-3.42146
VIT_03s0091g00280	-0.352302	0.958533	-2.94342	-5.90689	-5.05889	-2.07907
VIT_16s0013g00310	0.0931094	1.24082	-3.27462	-4.90689	-5.42146	-2.67423
VIT_04s0008g05080	-0.980891	0.400538	-2.18442	-6.64386	-5.64386	-2.25154
VIT_05s0102g00200	0.505891	-0.777608	-1.92504	-5.42146	-3.18442	-1.73697
VIT_16s0100g00480	0.632268	1.255	-2.01937	-5.42146	-5.90689	-1
VIT_19s0014g01600	1.53439	1.03562	-1	-5.90689	-6.22882	-1
VIT_10s0003g00380	1.03562	1.73697	-1.05889	-5.05889	-4.14136	-1
VIT_16s0098g01510	0.102098	0.00958605	-4.14136	-4.64386	-5.42146	-1
VIT_03s0091g01200	0.745596	-0.125531	-3.76939	-5.42146	-5.22882	-1
VIT_13s0074g00500	0.953576	-1.1954	-3.8365	-5.42146	-4.90689	-1
VIT_06s0080g01020	0.837271	-0.836501	-4.14136	-5.90689	-4.14136	-2.76939
VIT_05s0062g00260	1.04031	-0.528379	-5.22882	-4.64386	-3.42146	-1
VIT_03s0017g01140	0.457682	-0.0892673	-3.98089	-6.64386	-3.52838	0.263034
VIT_11s0037g00020	-0.234465	0.863938	-2.90689	-2.5009	-3.8365	-2.98089
VIT_19s0015g00940	0.102098	1.04264	-3.09954	-3.14136	-3.27462	-2.47393
VIT_06s0004g00530	-0.184425	1.27103	-1.96203	-2.64386	-3.37084	-2.29808
VIT_15s0046g01550	0.613532	0.948601	-2.8365	-4.05889	-3.42146	-1.65896
VIT_15s0046g01960	0.771181	1.0024	-2.55639	-3.42146	-2.8365	-1.90689
VIT_05s0020g01160	0.861294	1.26103	-2.39593	-3.76939	-4.05889	-2.01937
VIT_09s0002g04450	0.302563	0.0191088	-3.52838	-2.90689	-3.27462	-2.18442
VIT_14s0108g00930	1.15489	0.238787	-4.32193	-3.52838	-3.01937	-1.59946
VIT_17s0000g07630	0.363638	2.43918	-3.37084	-4.32193	-4.05889	-3.58496
VIT_06s0004g01080	0.578536	1.47681	-2.47393	-3.8365	-3.76939	-3.18442
VIT_06s0009g01090	0.0840643	1.14622	-4.52838	-2.73697	-4.42146	-0.713119
VIT_07s0129g00360	-0.240134	1.11326	-3.98089	-3.05889	-3.8365	-1
VIT_03s0063g00380	-0.68966	0.695994	-4.14136	-4.52838	-3.58496	-0.871267
VIT_08s0007g03240	-0.592194	2.255	-1.81943	-3.09954	-5.22882	-1
VIT_02s0025g02710	0.0332762	2.76553	-3.01937	-3.64386	-4.05889	-1
VIT_12s0035g00140	-2.61411	0.59136	-3.14136	-3.47393	-3.37084	-2.94342
VIT_16s0039g02440	-1.80255	1.26103	-2.90689	-3.42146	-2.61411	-2.58496
VIT_12s0035g02020	-1.57061	1.05658	-4.42146	-3.76939	-2.80255	-3.64386
VIT_16s0050g00670	-0.952694	2.51602	-3.37084	-4.90689	-2.5009	-3.37084
VIT_02s0012g00110	-2.29808	0.15056	-2.76939	-3.8365	-3.64386	-1
VIT_14s0068g00210	-2.18442	0.776806	-2.5009	-2.8365	-4.05889	-0.845114
VIT_04s0023g02730	-1.72102	0.447138	-2.76939	-3.32193	-2	-1
VIT_18s0166g00080	-0.962032	0.948601	-5.64386	-4.22882	-6.22882	-5.64386
VIT_18s0072g00360	-0.421464	0.8101	-5.42146	-3.70526	-5.05889	-5.42146
VIT_05s0077g01050	-1.04891	0.0565835	-5.64386	-3.58496	-3.98089	-4.22882
VIT_19s0085g00690	-0.971431	1.20789	-7.22882	-5.42146	-5.64386	-5.05889
VIT_18s0001g10330	-1.75309	0.201634	-4.42146	-4.42146	-4.14136	-6.64386
VIT_03s0038g03140	-1	0.522725	-5.05889	-2.55639	-3.90689	-6.64386
VIT_17s0000g04830	0.678072	0.163499	-3.90689	-5.90689	-4.64386	-5.64386
VIT_12s0057g01450	1.05427	-0.228819	-4.32193	-4.52838	-4.14136	-5.05889
VIT_03s0038g00470	1.63691	-1.1954	-4.52838	-5.05889	-5.64386	-4.64386
VIT_08s0007g04480	0.0612002	-2.05889	-4.64386	-4.52838	-4.05889	-4.76939
VIT_10s0003g04910	0.526069	-3.09954	-5.05889	-1	-5.90689	-5.64386
VIT_11s0016g00980	0.943609	-2.18442	-4.05889	-1.65896	-5.64386	-6.64386
VIT_14s0030g00040	0.411426	-0.315929	-3.18442	-1.52838	-5.90689	-5.64386
VIT_04s0023g00710	2.1021	-0.217591	-4.14136	-1	-5.42146	-4.76939
VIT_07s0005g02090	0.341037	-1.92504	-2.80255	-3.05889	-6.22882	-4.42146
VIT_04s0044g01370	0.0285692	-1.72102	-2.67423	-2.44746	-6.22882	-3.64386
VIT_02s0025g03330	2.80667	1.33151	-3.14136	-5.42146	-7.22882	-4.22882
VIT_01s0010g03590	-3.09954	0.314213	-1.78588	-2.64386	-5.64386	-5.05889
VIT_01s0010g02800	-2.8365	0.85599	-2.09954	-2.37084	-4.64386	-4.32193
VIT_11s0052g00620	-2.76939	1.45066	-1.02915	-0.906891	-6.64386	-4.52838
VIT_04s0079g00480	-5.05889	2.006	-1.12029	-1.37084	-6.22882	-4.42146
VIT_07s0031g00690	-5.90689	1.42044	-0.666576	-0.389615	-6.64386	-3.37084
VIT_12s0059g02040	-5.05889	2.68182	-1.54232	-0.298081	-4.52838	-3.76939
VIT_14s0068g01520	-0.606767	0.992768	-0.421464	-1.5009	-5.64386	-3.01937
VIT_01s0026g01490	-0.40864	1.55582	-0.467267	-0.777608	-6.22882	-3.32193
VIT_17s0000g09820	-0.584963	2.19114	0.629162	-0.334001	-5.90689	-3.18442
VIT_11s0016g03040	-1	2.0681	0.600904	-0.321928	-5.90689	-1.75309
VIT_14s0006g01460	-1	2.62293	-0.136062	-0.152003	-4.42146	-2.5009
VIT_04s0023g02220	-3.14136	2.12873	-1	-3.47393	-5.90689	-1
VIT_12s0059g02180	-2.29808	2.18481	-1	-2.44746	-5.64386	-1
VIT_11s0016g01140	-2.87127	2.15056	-1	-1	-5.64386	-1
VIT_04s0008g01810	-1.32193	1.0681	-4.64386	-5.42146	-5.42146	-1
VIT_16s0039g02430	-1.58496	0.98307	-4.90689	-3.27462	-5.90689	-1
VIT_06s0004g03470	-1.48735	0.978196	-4.05889	-3.98089	-8.22882	-1
VIT_15s0046g02210	0.102098	0.352382	-6.64386	-5.22882	-7.22882	-1
VIT_18s0122g01430	-4.32193	0.422233	-3.76939	-3.42146	-5.64386	-2.8365
VIT_07s0031g00570	-4.32193	0.133125	-5.05889	-2.14136	-6.64386	-1
VIT_04s0008g00740	-2.87127	0.785202	-5.22882	-1.62891	-4.42146	-1
VIT_16s0022g01390	-1	1.31034	-6.64386	-0.0193653	-6.64386	-1
VIT_11s0118g00070	-1	2.38221	-5.22882	-1	-7.22882	-1
VIT_06s0004g05590	-4.90689	1.41684	-4.90689	-2.34618	-6.64386	-5.22882
VIT_09s0002g00510	-4.90689	0.943609	-3.58496	-1.80255	-6.22882	-5.22882
VIT_10s0116g01490	-5.05889	0.488858	-6.22882	-4.64386	-7.22882	-5.64386
VIT_10s0003g05230	-2.64386	0.0612002	-6.64386	-1	-4.76939	-5.22882
VIT_08s0007g00600	-1.58496	0.604071	-5.90689	-1	-4.76939	-5.42146
VIT_18s0041g00250	-4.90689	0.333424	-6.64386	-2.70526	-4.14136	-6.64386
VIT_01s0137g00390	0.662965	0.102098	-4.05889	-5.22882	-1	-2.98089
VIT_10s0003g03410	0.91584	0.271027	-3.42146	-4.76939	-1	-2.55639
VIT_10s0003g03430	0.584963	0.422233	-3.47393	-3.98089	-1	-3.47393
VIT_14s0066g00060	0.897886	0.831877	-3.01937	-4.14136	-1	-2.94342
VIT_17s0000g06790	-0.577767	0.20581	-3.64386	-5.05889	-2.07907	-3.09954
VIT_16s0022g00940	2.53937	0.432959	-4.64386	-5.42146	-1	-2.76939
VIT_01s0011g03270	2.16779	1.0072	-4.32193	-4.76939	-2.01937	-2.42146
VIT_13s0064g00430	0.306457	-1.73697	-2.14136	-5.22882	-1	-3.52838
VIT_18s0086g00220	0.785202	-1.80255	-1.38333	-5.42146	-1	-2.94342
VIT_07s0031g00270	0.604071	-3.22882	-2.07907	-5.42146	-1	-3.8365
VIT_11s0016g01320	1.12873	-0.67423	-2.18442	-5.90689	-1	-2.94342
VIT_11s0052g00750	1.56234	0.344828	-2.32193	-5.64386	-1	-2.80255
VIT_08s0040g01740	0.584963	-0.434403	-1.57061	-5.42146	-1	-4.32193
VIT_01s0011g02930	2.51602	-0.115077	-1.75309	-6.64386	-3.32193	-4.32193
VIT_04s0008g01290	1.80598	-0.130787	-1.4344	-5.22882	-3.98089	-4.42146
VIT_14s0068g01390	0.374808	-0.853779	-1.85378	-5.42146	-3.42146	-4.42146
VIT_17s0000g03550	1.97575	0.62293	-1	-4.64386	-2.90689	-5.64386
VIT_03s0038g03420	3.29768	-2.52838	-1.92504	-4.90689	-3.05889	-5.05889
VIT_10s0071g00860	2.77118	0.367371	-3.8365	-4.64386	-1	-5.22882
VIT_01s0011g01560	2.64923	0.581753	-3.52838	-3.98089	-1	-5.22882
VIT_09s0054g00380	2.39415	-0.500898	-3.90689	-4.64386	-1	-6.22882
VIT_10s0003g02170	3.91456	-0.195396	-4.52838	-4.05889	-1	-4.14136
VIT_05s0062g01090	3.98337	-0.853779	-3.32193	-3.90689	-1	-4.52838
VIT_01s0010g02500	1.72538	-1.47393	-5.90689	-5.05889	-1	-5.64386
VIT_17s0000g09700	0.565597	-0.0689474	-5.22882	-3.90689	-1	-6.22882
VIT_12s0057g01030	1.79216	0.359896	-5.42146	-7.22882	-1	-5.90689
VIT_14s0066g00010	0.555816	-1.48735	-5.90689	-5.64386	-1	-1
VIT_19s0027g01880	0.509274	-0.298081	-6.64386	-5.90689	-1	-1
VIT_13s0019g02150	2.23573	-1.73697	-7.22882	-5.42146	-1	-1
VIT_16s0050g02100	1.07496	1.74846	-7.22882	-4.22882	-1	-1
VIT_18s0001g09880	-1.48735	3.09311	-5.22882	-5.42146	-1	-4.22882
VIT_14s0219g00030	-1.92504	1.6477	-4.42146	-6.64386	-1	-1
VIT_17s0000g04330	0.0379678	2.39415	-3.8365	-4.14136	-1	-7.22882
VIT_09s0002g05680	0.218265	2.43741	-3.58496	-3.42146	-1	-7.22882
VIT_01s0010g02240	0.214125	2.61039	-4.42146	-2.27462	-1	-5.90689
VIT_08s0007g07790	1.57854	2.85931	-2.90689	-3.98089	-1	-6.22882
VIT_08s0007g07480	2.54679	2.69451	-3.47393	-3.64386	-1	-5.64386
VIT_14s0068g01780	2.24286	1.93105	-5.05889	-2.55639	-1	-5.90689
VIT_08s0007g08800	-1.92504	1.19745	-4.42146	-5.22882	-1	-7.22882
VIT_12s0034g02570	-1.59946	1.49228	-5.64386	-2.52838	-1.75309	-7.22882
VIT_10s0116g00080	-2.01937	2.75916	-2.94342	-3.22882	-1	-6.64386
VIT_13s0067g02380	-2.80255	2.86129	-1.29808	-2.16273	-1	-5.42146
VIT_04s0044g01540	-1.152	4.30061	-4.90689	-2.64386	-1	-6.22882
VIT_04s0210g00160	-1.70526	4.54844	-2.73697	-1.25154	-2.09954	-6.64386
VIT_05s0062g00270	0.559084	-0.888969	-3.8365	-0.395929	0.415037	-6.22882
VIT_05s0062g00300	1.32385	-0.728973	-2.76939	-0.606767	0.754175	-6.64386
VIT_07s0104g00020	0.0931094	0.209973	-4.76939	-1	-1	-5.05889
VIT_07s0129g00190	-0.173536	1.30061	-3.70526	-0.819428	-1.67423	-8.22882
VIT_07s0031g02270	2.70192	0.920928	-1.46063	-1.76939	-1	-7.22882
VIT_12s0028g03480	0.294743	-1.92504	-5.90689	-5.64386	-7.22882	-1
VIT_14s0030g00350	0.385891	-3.52838	-4.90689	-5.64386	-6.64386	-1
VIT_09s0002g04420	0.271027	-2.67423	-2.67423	-5.90689	-5.42146	-2.58496
VIT_14s0030g01050	1.0635	-3.47393	-1.38333	-4.52838	-4.76939	-1.90689
VIT_03s0063g01470	0.757023	-1.88897	-1	-5.64386	-5.64386	-5.42146
VIT_06s0004g01450	1.20163	-1.152	0.385891	-4.76939	-5.90689	-6.64386
VIT_02s0025g01860	0.719549	-3.14136	-2.18442	-3.37084	-7.22882	-7.22882
VIT_12s0059g01220	-2.5009	0.432959	-6.64386	-1	-1	-1
VIT_14s0128g00450	-2.44746	0.874469	-6.64386	-1	-1	-1
VIT_06s0061g01270	-1	0.298658	-6.64386	-1	-1	-1
VIT_04s0008g00900	-1.61411	1.80873	-5.90689	-2.09954	-2.32193	-1
VIT_14s0036g01120	-1.48735	3.17206	-5.64386	-2.18442	-1	-1
VIT_11s0016g05170	-4.52838	1.59136	-6.64386	-0.666576	-1.78588	-1
VIT_18s0001g01310	-2.55639	0.831877	-5.90689	0.884923	0.0658021	-2.94342
VIT_18s0117g00050	-1	2.16564	-7.22882	1.38036	-1.48735	-1
VIT_01s0127g00050	-2.32193	4.35238	-5.22882	0.41864	0.701919	-2.55639
VIT_08s0007g08920	-1.08927	3.62994	-6.64386	-2.5009	-3.8365	-3.64386
VIT_13s0067g01420	-0.234465	3.54019	-5.42146	-2.37084	-2.8365	-4.05889
VIT_05s0094g01130	-1.90689	3.83626	-4.90689	-2.87127	-5.64386	-1
VIT_19s0015g00580	-1	5.76651	-4.76939	-0.906891	-3.70526	-1
VIT_14s0030g00990	0.0658021	0.119909	-2.12029	-1.13079	-2.29808	-3.05889
VIT_02s0025g00910	0.133125	-0.0389941	-1.70526	-1.42146	-2.22882	-3.01937
VIT_04s0023g01480	0.82103	-0.245825	-1.39593	-1.05889	-2.05889	-2.90689
VIT_19s0015g01440	0.39689	-0.769387	-2.07907	-1.96203	-2.5009	-1.98089
VIT_17s0000g03330	0.0143553	0.0565835	-2.32193	-1.81943	-2.42146	-2.34618
VIT_13s0067g02360	0.690045	-0.217591	-1.62891	-2.20645	-1.37084	-2.8365
VIT_10s0042g00460	0.286881	-0.971431	-1.04891	-1.64386	-1.94342	-2.05889
VIT_03s0038g01550	0.0749621	-0.736966	-0.79419	-1.2863	-1.76939	-2.09954
VIT_01s0011g06570	0.807355	-0.592194	-1.62891	-0.888969	-1.92504	-1.70526
VIT_19s0090g01400	0.87709	-1.21759	-1.38333	-2.29808	-2.44746	-2.70526
VIT_18s0001g13580	0.610385	-1.07907	-1.47393	-1.54232	-2	-2.67423
VIT_04s0008g03560	1.41684	0.389567	-1.07907	-1.64386	-2.01937	-2.39593
VIT_03s0091g00530	1.23879	0.447138	-1.4344	-1.57061	-1.75309	-2.05889
VIT_13s0106g00230	1.47854	0.62605	-1.54232	-1.76939	-1	-2.12029
VIT_02s0025g02610	1.19535	1.21826	-1.85378	-1.334	-1.00965	-2.01937
VIT_06s0009g00320	1.67957	0.0658021	-1.92504	-0.925038	-1.10988	-2.64386
VIT_12s0057g00430	2.3599	-0.383329	-1.59946	-1.65896	-2.44746	-2.73697
VIT_03s0063g01950	1.85997	0.0565835	-1.65896	-1.10988	-2.44746	-2.25154
VIT_07s0129g00710	1.88753	-0.549339	-2.16273	-2.22882	-1.94342	-2.42146
VIT_07s0031g00770	1.39506	-1.94342	-1.78588	-1.13079	-1.90689	-2.55639
VIT_07s0151g00020	1.44714	-1.81943	-0.871267	-1	-1	-2.37084
VIT_07s0005g00890	0.238787	-1.34618	-0.621488	-0.777608	-0.666576	-2.87127
VIT_09s0002g08030	0.20581	-1.06895	-1.12029	-2.34618	-1	-1.68966
VIT_14s0219g00270	1.27302	-0.721024	-0.599462	-1.8365	-1.24013	-2.09954
VIT_08s0040g02960	1.53771	-1	-1.26303	-1.85378	0.0519521	-2.52838
VIT_05s0020g02370	0.298658	-0.168123	-3.37084	-2.47393	-1.94342	-1.26303
VIT_10s0116g01870	0.900464	-0.321928	-3.27462	-2.14136	-2.55639	-1
VIT_10s0003g03320	0.49228	-0.0340618	-3.27462	-2.16273	-1	-1.87127
VIT_13s0019g04070	0.78799	-0.888969	-2.61411	-1.51457	-1.46063	-1.27462
VIT_11s0118g00540	0.555816	-0.915936	-3.27462	-0.819428	-2.44746	-2.16273
VIT_10s0116g01610	0.141869	-1.44746	-3.47393	-3.76939	-1	-1
VIT_13s0019g02880	0.768361	-0.819428	-3.27462	-3.32193	-1	-1
VIT_06s0004g08270	-0.542318	0.804604	-1.73697	-1.87127	-2.37084	-2.32193
VIT_10s0003g04320	-0.321928	0.968398	-1.5009	-2.05889	-1.98089	-2.44746
VIT_14s0060g01570	-0.802554	0.765535	-1.65896	-1.58496	-1.58496	-2.58496
VIT_14s0128g00270	-0.473931	0.475085	-2.07907	-1.5009	-1.94342	-1.98089
VIT_12s0034g02470	-0.721024	0.371094	-1.48735	-0.802554	-2.55639	-2.32193
VIT_16s0039g00430	-0.880091	0.980635	-2.64386	-1.10988	-2.52838	-2.29808
VIT_14s0068g01210	-0.745003	0.842644	-2.67423	-1.26303	-2.47393	-1.98089
VIT_13s0067g02310	-0.836501	0.970854	-2.80255	-1.92504	-2.18442	-2.76939
VIT_19s0014g00230	0.286881	1.28096	-2.20645	-1.58496	-3.27462	-1
VIT_05s0077g01030	0.49228	1.41864	-2	-1.44746	-2.73697	-1.62891
VIT_12s0035g00070	-0.358454	1.13969	-1.70526	-1.81943	-2.61411	-1.22882
VIT_04s0008g02220	0.356144	1.69748	-2.09954	-1.8365	-1.90689	-1.80255
VIT_07s0104g01740	-0.460634	0.49228	-3.05889	-1.55639	-2.25154	-1
VIT_18s0001g10740	-0.0340618	1.37481	-2.20645	-1.44746	-1.48735	-2.98089
VIT_15s0048g01730	-0.514573	2.0072	-2.39593	-1.24013	-1.62891	-2.73697
VIT_14s0066g01000	-0.321928	1.71955	-1.64386	-2.01937	-1	-3.70526
VIT_16s0039g00480	0.0143553	2.20581	-0.769387	-2.32193	-1.57061	-1.57061
VIT_14s0128g00610	0.111031	2.1964	-1.08927	-1.81943	-1	-1
VIT_09s0002g03470	0.282934	1.88622	-0.713119	-2.39593	-0.315929	-0.79419
VIT_04s0044g01030	-0.621488	1.66448	-2.29808	-1.00965	-1	-1
VIT_12s0034g01430	0.0749621	2.02385	-2.29808	-0.713119	-0.728973	-0.705257
VIT_05s0102g00660	0.562344	-0.79419	-0.434403	-1.81943	-3.37084	-2.22882
VIT_10s0003g00560	0.684071	-0.599462	-0.621488	-2.12029	-3.14136	-1.98089
VIT_14s0036g00070	0.250962	-0.14667	-1	-2.14136	-3.32193	-1.94342
VIT_05s0020g00910	0.62293	-0.906891	-0.245825	-2.70526	-3.52838	-1.20645
VIT_02s0025g03610	0.106572	-0.570607	0.475085	-2.16273	-3.42146	-1.92504
VIT_07s0005g03140	0.842644	-1.64386	-1.10988	-2.12029	-3.98089	-1.81943
VIT_12s0028g01370	0.742725	-0.888969	-0.745003	-2	-4.52838	-1.13079
VIT_12s0034g02500	0.542671	-0.897902	-1.85378	-1.68966	-3.14136	-1.57061
VIT_14s0108g01250	0.371094	-0.853779	-1.5009	-1.17354	-3.14136	-1.14136
VIT_09s0002g03860	0.722466	-1.18442	-0.915936	-1.90689	-2.73697	-1.17354
VIT_08s0007g02530	0.234706	-0.753085	-0.68966	-0.753085	-2.98089	-1.64386
VIT_13s0139g00110	0.82103	-1.72102	-2.16273	-1.90689	-2.98089	-1.8365
VIT_17s0000g05440	0.632268	-0.440916	-1.73697	-2.87127	-2.47393	-0.819428
VIT_14s0108g00340	0.85599	-0.383329	-1.12029	-2.67423	-3.22882	-0.628906
VIT_18s0001g08930	1.0048	0.411426	-0.769387	-1.59946	-3.52838	-1
VIT_12s0134g00460	1.29866	0.189034	-0.880091	-1.72102	-2.94342	-1.21759
VIT_16s0050g01650	1.05427	-0.352302	-0.980891	-1.51457	-3.70526	-0.643856
VIT_07s0005g03290	0.00480099	-0.0639118	-0.500898	-1.65896	-3.98089	-0.802554
VIT_14s0108g00660	0.910733	0.874469	-0.286304	-1.68966	-4.42146	-1.09954
VIT_09s0054g00640	0.785202	0.762703	-0.200913	-1.02915	-4.42146	-0.535332
VIT_01s0011g02900	0.457682	1.5177	0.102098	-1.8365	-4.14136	-0.897902
VIT_04s0008g03570	0.119909	0.975752	-0.40227	-2.25154	-3.98089	-1.72102
VIT_01s0011g02520	0.0565835	0.385891	-1.85378	-0.584963	-4.42146	-0.753085
VIT_01s0146g00340	0.167786	0.850666	-1.17354	-1.334	-4.32193	-0.52146
VIT_14s0066g01480	-0.68966	1.22033	-0.962032	-1.68966	-4.42146	-2.18442
VIT_13s0019g04420	-0.346176	1.46815	-1.24013	-1.5009	-4.05889	-2
VIT_12s0134g00220	-1	1.26704	-1.06895	-1.42146	-4.90689	-1.55639
VIT_18s0041g00230	-1	1.1375	-1	-2.07907	-3.70526	-1
VIT_11s0016g05340	-0.906891	1.60881	-1	-1.54232	-3.32193	-1
VIT_04s0023g00470	-1	-0.0740006	0.115477	-1.2863	-2.42146	-1.05889
VIT_01s0010g00710	-0.67423	0.385891	-0.234465	-1.22882	-1.98089	-1.24013
VIT_01s0010g01090	-0.880091	-0.0790716	0.831877	-0.636362	-2.42146	-0.962032
VIT_14s0006g03270	-0.925038	0.635367	0.254997	-0.606767	-2.03899	-0.79419
VIT_02s0025g00810	-0.162729	-0.21201	0.172061	-0.421464	-2.05889	-1.20645
VIT_13s0064g01440	-1.38333	0.184809	-0.962032	-1.8365	-2.22882	-1.46063
VIT_04s0023g03260	-1.72102	0.32577	-0.962032	-1.07907	-2.80255	-1.35845
VIT_18s0001g08450	0.0473057	0.436517	0.294743	-1.18442	-3.27462	-1.76939
VIT_12s0034g00990	-0.115077	1.09536	-0.173536	-1.27462	-2.70526	-2.12029
VIT_18s0001g12210	-0.257275	1.08859	-0.240134	-2.20645	-2.39593	-1.47393
VIT_04s0023g03220	-1.52838	1.14622	0.250962	-0.467267	-3.18442	-1.64386
VIT_02s0012g01260	-0.240134	1.25298	0.254997	-0.184425	-3.8365	-2.16273
VIT_12s0057g00310	-1	-0.769387	0.337235	-0.643856	-3.27462	-0.0489096
VIT_08s0056g01500	-1.01937	-0.115077	-0.500898	-0.17897	-3.22882	0.159199
VIT_08s0032g00190	-0.415037	-1.25154	-0.494109	-1.29808	-4.52838	0.0191088
VIT_14s0030g00420	-0.454032	0.0976108	-0.990414	-2.47393	-3.98089	-3.37084
VIT_07s0151g01040	0.230613	0.63846	-1.29808	-2.47393	-3.98089	-3.32193
VIT_14s0108g01270	0.128733	-0.240134	-1.80255	-2.76939	-3.8365	-3.42146
VIT_04s0043g00850	-0.389615	0.936088	-1.62891	-2.80255	-4.42146	-2.64386
VIT_05s0020g02250	0.0795203	0.539366	-1.01937	-2.64386	-4.42146	-2.61411
VIT_14s0030g02080	-0.65139	0.400538	-1.22882	-2.61411	-5.05889	-4.05889
VIT_08s0007g07820	0.0191088	0.874469	-1.34618	-2.32193	-4.90689	-3.47393
VIT_12s0059g00030	-0.990414	0.0885939	-2.22882	-2.01937	-4.76939	-3.98089
VIT_13s0019g02450	-1.152	0.481988	-1.65896	-2.8365	-4.05889	-3.70526
VIT_08s0007g08500	-0.556393	0.337235	-1.16273	-1.78588	-3.64386	-3.22882
VIT_19s0014g04270	-0.389615	0.616671	-1.18442	-1.88897	-3.52838	-2.70526
VIT_17s0000g08990	0.568843	0.374808	-1.00965	-2.01937	-3.58496	-2.58496
VIT_12s0028g03990	-0.0389941	0.111031	-1.09954	-1.4344	-3.37084	-2.42146
VIT_19s0015g01670	-0.292181	0.0143553	-1.96203	-1.54232	-3.42146	-2.67423
VIT_13s0064g01380	0.172061	-0.37707	-2.01937	-2.14136	-3.90689	-2
VIT_19s0014g05150	0.782409	0.495695	-0.845114	-1.87127	-4.90689	-3.52838
VIT_15s0048g01260	1.07268	0.678072	-0.745003	-1.55639	-4.42146	-3.98089
VIT_19s0015g01650	0.226509	0.250962	-1.00965	-1.08927	-3.76939	-3.76939
VIT_03s0038g03220	0.837271	0.572081	-2.18442	-2.42146	-2.8365	-3.76939
VIT_16s0039g02460	0.710761	1.16993	-2.25154	-1.98089	-3.27462	-3.64386
VIT_08s0007g01590	0.374808	0.31034	-1.92504	-3.01937	-3.18442	-4.05889
VIT_18s0001g12300	1.39506	0.850666	-2.87127	-1.88897	-4.42146	-3.8365
VIT_14s0083g00370	0.834576	1.13313	-2.80255	-2.34618	-4.64386	-2.70526
VIT_18s0001g00170	1.53771	0.8101	-1.00965	-1.75309	-3.05889	-3.52838
VIT_04s0008g06300	1.56722	0.815575	-1.27462	-1.5009	-3.18442	-3.42146
VIT_18s0001g04630	1.64309	0.943609	-1.27462	-1.80255	-2.44746	-3.42146
VIT_08s0007g04820	1.78799	1.54432	-1.47393	-2.07907	-3.27462	-3.64386
VIT_18s0001g08610	0.629162	1.04963	-1.18442	-2	-2.90689	-4.05889
VIT_06s0061g01370	1.47854	1.95109	-1.20645	-1.68966	-3.05889	-4.42146
VIT_08s0007g03660	1.66448	1.24894	-1.05889	-1.58496	-2.98089	-2.73697
VIT_13s0073g00550	1.94735	1.79632	-0.79419	-1.61411	-2.5009	-2.55639
VIT_16s0098g01740	2.14078	1.36737	-0.440916	-0.980891	-2.76939	-2.25154
VIT_14s0030g00240	2.28096	1.17206	-1.54232	-1.55639	-1.87127	-3.37084
VIT_12s0028g02240	2.15056	0.882317	-1.39593	-1.12029	-2.09954	-3.09954
VIT_04s0008g00130	3.02916	1.43474	-1.57061	-2.67423	-3.37084	-3.42146
VIT_14s0066g02320	3.19535	0.858644	-0.785875	-2.55639	-3.47393	-3.42146
VIT_18s0001g10910	3.01018	1.29082	-1.04891	-1.96203	-2.73697	-2.94342
VIT_14s0108g00110	1.3084	0.385891	-1.17354	-2.27462	-3.70526	-2.76939
VIT_18s0001g09430	1.90304	0.189034	-1.32193	-2.03899	-3.58496	-2.61411
VIT_11s0016g04840	0.871844	1.24691	-1.26303	-2.25154	-3.76939	-3.01937
VIT_12s0028g03030	1.1375	0.641546	-1.76939	-2.70526	-3.05889	-1.76939
VIT_02s0025g02460	2.24995	0.00958605	-2.61411	-2.09954	-3.14136	-2.76939
VIT_12s0028g01840	2.19325	1.25096	-2.42146	-2.14136	-3.64386	-2.94342
VIT_10s0003g03690	1.12212	-0.053893	-2.61411	-1.22882	-3.64386	-1.47393
VIT_14s0030g00390	1.69153	-0.0943924	-1.80255	-1	-3.98089	-1.80255
VIT_14s0083g00120	0.632268	0.834576	-1.2863	-1.62891	-4.05889	-1.85378
VIT_11s0065g01100	1.18481	0.713696	-1.44746	-1.17354	-3.8365	-1.81943
VIT_11s0016g05640	0.653824	1.53937	-0.286304	-0.728973	-4.05889	-2.73697
VIT_08s0040g03180	1.13313	1.18057	-0.109878	-1.24013	-3.98089	-2.52838
VIT_04s0008g00880	0.552541	2.0012	-0.280451	-1.12029	-3.22882	-3.01937
VIT_06s0004g02360	0.432959	2.47422	-0.666576	-1.22882	-2.76939	-2.61411
VIT_12s0028g01850	1.69302	0.512648	-2.18442	-3.42146	-4.22882	-5.64386
VIT_16s0050g00100	1.98914	0.363638	-2.32193	-3.18442	-4.32193	-4.90689
VIT_09s0002g05750	1.11326	0.209973	-2.09954	-3.47393	-4.42146	-4.42146
VIT_04s0008g03270	1.43296	0.765535	-2.16273	-3.09954	-4.64386	-4.22882
VIT_03s0038g02120	2.04847	0.254997	-1.98089	-3.14136	-3.64386	-4.05889
VIT_01s0026g00950	3.04264	-0.0489096	-1.5009	-3.14136	-3.58496	-4.22882
VIT_08s0007g04540	1.9684	0.400538	-0.79419	-3.90689	-3.58496	-4.14136
VIT_06s0080g01160	2.10657	0.367371	-1.51457	-2.27462	-3.76939	-5.42146
VIT_09s0002g00320	2.0024	0.306457	-1.30996	-1.67423	-3.8365	-4.52838
VIT_12s0134g00010	1.86129	0.549258	-0.168123	-1.334	-4.52838	-5.64386
VIT_05s0062g00630	0.282934	0.356144	-0.862496	-2	-5.42146	-5.22882
VIT_17s0000g08160	1.33724	0.992768	-1.25154	-2.73697	-4.90689	-5.90689
VIT_07s0129g00150	0.568843	-1.35845	-1.48735	-2.55639	-3.70526	-5.64386
VIT_16s0050g00020	0.997594	-0.494109	-1.62891	-2.27462	-3.37084	-5.05889
VIT_17s0000g09730	0.600904	-1.44746	-1	-1	-3.76939	-4.52838
VIT_05s0020g02730	1.1177	-2.70526	-1.64386	-2.18442	-4.76939	-4.52838
VIT_01s0011g04710	0.209973	-1.68966	-1.37084	-3.58496	-3.8365	-3.90689
VIT_08s0007g05610	0.63846	-0.120294	-2.16273	-4.14136	-1	-1.03899
VIT_10s0003g03340	1.04498	0.222392	-1.76939	-3.52838	-1	-1.39593
VIT_01s0182g00140	0.584963	-0.268817	-0.592194	-3.52838	-1.90689	-1.54232
VIT_05s0062g01160	0.659925	-0.309955	-1	-3.42146	-1	-1
VIT_16s0039g01430	0.505891	0.184809	-2.58496	-4.05889	-2.05889	-1.88897
VIT_18s0001g02140	0.111031	-1.51457	-1	-4.22882	-1	-1
VIT_18s0001g00160	2.3683	-0.0892673	-1.87127	-4.90689	-1	-1
VIT_05s0077g01650	2.76341	0.461179	-1.48735	-4.42146	-1	-1
VIT_07s0130g00030	2.24184	-1.22882	-0.728973	-4.14136	-1	-1
VIT_18s0001g14790	2.20685	-0.40864	-0.819428	-3.18442	-1.76939	-1.27462
VIT_03s0017g02240	1.50758	0.641546	-0.37707	-2.55639	-1	-0.658963
VIT_12s0142g00280	1.25298	1.48714	0.389567	-2.44746	-1.18442	-0.643856
VIT_15s0048g02880	1.48886	2.0024	-0.352302	-2.98089	-0.542318	-1
VIT_17s0000g04930	1.67356	1.16135	-0.79419	-3.22882	-1.92504	0.184809
VIT_04s0008g00220	1.75417	1.38221	-0.263034	-2.52838	-2.05889	0.0332762
VIT_04s0008g04530	1.60565	0.512648	-1.64386	-2.18442	-0.563483	-0.67423
VIT_01s0146g00400	0.222392	0.913288	-2.01937	-3.42146	-0.599462	0.970854
VIT_08s0032g00700	0.234706	0.604071	-1.68966	-5.05889	-1	-1
VIT_14s0128g00650	-0.346176	1.41143	-1.94342	-4.76939	-1	-1
VIT_01s0011g03720	-0.434403	1.41864	-1	-6.22882	-1	-1
VIT_13s0019g01940	-1.46063	0.290818	-1	-4.52838	-1	-1
VIT_14s0066g00680	-0.785875	1.2162	-1.96203	-3.76939	-3.18442	-0.915936
VIT_06s0004g01320	0.180572	0.837271	-1.62891	-3.52838	-2.37084	-0.915936
VIT_08s0007g00220	-0.434403	1.59932	-1.55639	-4.14136	-2.07907	-2.18442
VIT_14s0066g00100	1.30256	0.869213	-2.20645	-2.98089	-1	-3.76939
VIT_13s0067g02340	1.69302	0.748461	-1.59946	-2.73697	-1	-4.22882
VIT_13s0067g02400	1.13093	1.70635	-1.52838	-2.32193	-1	-4.22882
VIT_03s0091g01010	1.17632	1.36177	-1.46063	-2.37084	-1	-3.76939
VIT_06s0061g01360	2.30061	1.34483	-2.39593	-2.94342	-1	-3.47393
VIT_04s0069g00990	1.16779	1.92853	-3.09954	-3.42146	-1	-3.98089
VIT_11s0016g04620	0.684071	1.14187	-1.22882	-2.20645	-1	-2.87127
VIT_01s0011g02940	1.08633	1.0072	-1.59946	-2.87127	-1	-1.96203
VIT_16s0022g01210	0.923466	2.52273	-1.85378	-2.73697	-1	-3.09954
VIT_08s0007g05500	1.21826	2.276	-1.34618	-2.37084	-1.04891	-2.03899
VIT_07s0005g00740	1.23879	0.8101	-1.40864	-3.90689	-1	-3.01937
VIT_07s0255g00020	0.910733	0.995183	-0.315929	-4.22882	-1	-3.52838
VIT_13s0156g00090	1.29474	1.0658	-0.535332	-2.98089	-1	-3.27462
VIT_18s0001g00550	1.24286	-0.0291463	-2	-3.64386	-2.32193	-3.52838
VIT_07s0129g00230	2.21412	-0.00481702	-2.14136	-3.52838	-1	-3.32193
VIT_12s0059g00970	1.7034	0.0143553	-1.24013	-4.05889	-1	-5.05889
VIT_17s0000g01370	1.20997	1.09311	-3.42146	-2.03899	-3.09954	-4.32193
VIT_03s0017g02190	1.55418	0.693022	-3.58496	-1.94342	-2.25154	-4.32193
VIT_09s0096g00550	1.02385	1.37851	-4.14136	-1.12029	-2.03899	-4.05889
VIT_08s0040g01040	2.04498	0.436517	-3.14136	-2.98089	-1.57061	-3.76939
VIT_17s0000g09270	2.07153	1.36551	-3.05889	-2.80255	-2.42146	-4.05889
VIT_01s0137g00510	0.742725	0.545968	-3.58496	-3.52838	-1	-4.64386
VIT_02s0012g01350	1.52774	0.650765	-2.64386	-3.01937	-1	-5.64386
VIT_19s0015g02140	-0.614109	1.16993	-2.44746	-0.480626	-2.27462	-4.32193
VIT_05s0094g01430	-0.0995357	0.495695	-1.70526	-0.556393	-1.88897	-4.05889
VIT_01s0011g00350	-0.40864	0.5025	-2.12029	-0.346176	-2.8365	-3.32193
VIT_14s0066g00160	0.411426	1.28096	-2.20645	-1.02915	-2.87127	-3.42146
VIT_17s0000g09570	-0.713119	0.59773	-2.98089	-0.853779	-3.14136	-4.42146
VIT_08s0058g00990	0.613532	0.887525	-2.29808	-0.200913	-4.05889	-3.98089
VIT_18s0001g05910	-0.251539	1.29082	-1.92504	-0.157356	-3.42146	-2.37084
VIT_09s0054g01760	0.555816	1.26704	-1.01937	-0.535332	-2.07907	-5.22882
VIT_10s0116g01140	1.21412	1.61039	-1.03899	-0.268817	-2.67423	-4.64386
VIT_13s0067g02980	-0.223194	1.70192	-1.08927	-0.274622	-2.98089	-5.42146
VIT_13s0019g05400	0.931053	0.707819	-1.87127	-0.120294	-1.35845	-4.14136
VIT_03s0063g00510	1.15056	0.908172	-1.22882	0.0519521	-2.03899	-4.32193
VIT_01s0011g04460	1.46292	0.278976	-1.55639	-0.315929	-1.12029	-4.76939
VIT_18s0001g00770	1.23471	1.05889	-1.78588	-0.327952	-0.364633	-4.05889
VIT_13s0019g02810	2.04498	-0.141356	-2.37084	-1	-1	-4.90689
VIT_04s0023g02870	1.79077	0.973305	-2.18442	-1.10988	-1	-5.22882
VIT_17s0000g06410	1.87447	0.807355	-1.94342	-1.17354	-2.01937	-4.52838
VIT_13s0106g00550	2.0024	1.88622	-2.87127	-1.39593	-1	-4.14136
VIT_15s0021g01380	1.46467	1.78101	-2.47393	-0.79419	-1.34618	-3.8365
VIT_14s0060g01810	3.42268	2.13969	-2.25154	-1.01937	-1	-4.76939
VIT_08s0007g07470	1.02621	1.66751	-0.542318	-0.334001	-2.20645	-3.64386
VIT_15s0021g02680	0.415037	1.91456	-0.871267	-0.925038	-1	-3.47393
VIT_07s0151g00590	1.36923	1.0681	-0.721024	-1.67423	-1	-3.14136
VIT_14s0066g01490	1.51096	1	0.0931094	-1.46063	-1	-3.37084
VIT_12s0028g03100	1.36177	1.59773	-0.358454	-1.64386	-1	-5.22882
VIT_08s0007g05130	2.26903	0.725378	-0.67423	-1.72102	0.0885939	-4.64386
VIT_09s0002g01400	1.27898	2.78171	-2.12029	-1.25154	-1	-3.27462
VIT_14s0128g00440	1.13969	3.39963	-2.12029	-1.80255	-1	-3.05889
VIT_19s0085g00760	1.62293	3.23726	-2.12029	-1.13079	-1.76939	-3.58496
VIT_19s0027g01850	0.987927	3.69896	-1	-1.09954	-1	-3.64386
VIT_16s0022g01820	1.42761	3.73624	-1.20645	-0.962032	-2.05889	-2.87127
VIT_08s0007g00340	0.0426443	2.79077	-2.25154	-1.16273	-1.92504	-3.8365
VIT_14s0108g01630	0.0976108	3.28145	-1.40864	-2.01937	-1.72102	-2.94342
VIT_14s0030g00870	0.690045	1.79355	-1.72102	0.197446	-1.34618	-3.09954
VIT_04s0008g05140	-0.0291463	2.5025	-1.54232	-0.17897	-1.35845	-2.64386
VIT_13s0073g00520	0.5025	2.7754	-1.80255	-0.0892673	-1.98089	-3.52838
VIT_19s0015g02090	0.635367	2.67506	-1.72102	0.124328	-1.05889	-4.32193
VIT_17s0000g05000	1.57854	2.54267	-1.67423	-0.053893	-0.563483	-3.8365
VIT_07s0005g03990	0.728283	3.5244	-0.0790716	-1.70526	-2.64386	-3.64386
VIT_19s0085g00800	1.69302	3.71991	0.0379678	0.00958605	-2.27462	-3.22882
VIT_13s0019g02550	2.31131	2.71516	-1.18442	-2.25154	-1	-3.76939
VIT_19s0015g00490	2.70782	3.40463	-0.721024	-1.57061	-1	-3.70526
VIT_04s0008g03200	2.85997	2.32673	-0.705257	-2.25154	-1.70526	-3.18442
VIT_07s0005g03230	1.86526	2.8646	-1.22882	-2.07907	-1.20645	-2.87127
VIT_13s0067g03250	1.92726	3.21516	-1.76939	-2.37084	-1	-2.64386
VIT_14s0128g00420	3.10322	3.1635	-1.27462	-2.07907	-1	-2.47393
VIT_12s0028g03190	2.18375	4.85881	-2	-2.14136	-1	-3.76939
VIT_17s0000g05830	3.04148	4.46989	-1.21759	-2.20645	-1	-4.05889
VIT_13s0067g03230	1.86262	3.27003	-1.72102	-1.90689	-2.76939	-5.90689
VIT_12s0059g01480	1.13093	3.34719	-1.72102	-1.76939	-2.52838	-4.76939
VIT_08s0040g00960	1.96963	2.006	-2.47393	-2.58496	-2.16273	-5.90689
VIT_04s0008g01080	0.99035	3.38082	-1.76939	-2.90689	-1	-5.42146
VIT_07s0104g00500	1.04731	3.73335	-2.55639	-2.27462	-1	-4.42146
VIT_06s0004g06950	2.68557	3.03562	-0.514573	-2.29808	-1	-6.22882
VIT_13s0064g01640	3.12983	3.19954	-1	-2.29808	-1	-5.64386
VIT_15s0048g02820	2.98914	2.04731	-0.136062	-1.75309	-1	-6.22882
VIT_14s0083g00380	2.16027	3.0066	-0.980891	-0.943416	-1	-5.22882
VIT_18s0041g00550	2.44537	2.6728	-0.0740006	-0.943416	-1	-4.64386
VIT_12s0055g00250	2.1188	2.64386	-0.168123	-0.599462	-2.27462	-4.32193
VIT_04s0023g03810	2.66978	2.89077	0.555816	-2.80255	-1	-3.98089
VIT_01s0026g00180	2.38681	2.51433	0.956057	-1.59946	-1	-3.70526
VIT_07s0005g01760	3.86987	0.653824	-0.152003	-1.37084	-0.713119	-3.8365
VIT_09s0002g05300	-0.0639118	1.39323	-1	-3.18442	-2.09954	-6.22882
VIT_14s0081g00730	0.176323	2.58336	-0.157356	-3.70526	-1	-4.90689
VIT_05s0020g04930	0.209973	-1.03899	-2.8365	-2.12029	-2.90689	-3.8365
VIT_14s0036g00540	1.09311	-0.728973	-2.87127	-2.27462	-3.01937	-3.98089
VIT_14s0030g00960	0.475085	-1.61411	-2.98089	-3.27462	-3.47393	-4.52838
VIT_07s0130g00220	0.845323	-2.14136	-3.09954	-2.20645	-2.32193	-4.76939
VIT_03s0017g02000	0.20581	-1.32193	-2.80255	-1.4344	-1.52838	-5.42146
VIT_19s0014g01320	0.95109	-1.04891	-3.14136	-1	-1	-4.22882
VIT_07s0104g00250	0.604071	-0.836501	-5.22882	-2.73697	-2.47393	-3.70526
VIT_01s0010g02640	1.08406	-2.14136	-4.14136	-2.01937	-1.96203	-3.22882
VIT_04s0023g00700	0.422233	-0.152003	-2.90689	-2.70526	-2.94342	-5.90689
VIT_16s0148g00130	0.450661	-0.0995357	-3.37084	-2.22882	-3.47393	-5.22882
VIT_06s0004g02300	0.374808	-0.0291463	-3.47393	-1.4344	-2.47393	-6.22882
VIT_11s0065g00460	0.59136	1.95358	-2.58496	-2.76939	-3.98089	-6.22882
VIT_11s0016g00740	0.678072	1.1021	-2.98089	-1.61411	-3.8365	-6.22882
VIT_06s0004g06300	0.681074	1.27103	-4.32193	-3.47393	-3.58496	-5.64386
VIT_02s0154g00600	0.20581	0.669027	-3.90689	-3.37084	-3.64386	-4.90689
VIT_03s0063g00620	-0.853779	1.41684	-2.76939	-2.73697	-2.55639	-4.14136
VIT_08s0007g05340	-1.00965	1.22033	-2.70526	-1.62891	-2.14136	-4.32193
VIT_12s0035g00630	-1	1.71223	-3.22882	-2.80255	-1	-4.64386
VIT_01s0011g00670	-1.42146	1.7754	-2.37084	-2.20645	-1	-4.22882
VIT_17s0000g05980	-1.1954	0.133125	-3.27462	-2.22882	-1.5009	-4.05889
VIT_04s0008g03510	-1	0.128733	-3.42146	-1.21759	-0.666576	-4.90689
VIT_01s0011g03320	0.440066	1.98914	-4.42146	-1.58496	-1.75309	-2.90689
VIT_01s0010g03550	0.0749621	2.0658	-3.64386	-1	-1	-3.70526
VIT_15s0048g02130	-1	1.90561	-4.32193	-1.85378	-1.75309	-3.64386
VIT_17s0000g05580	0.0931094	3.52482	-4.42146	-2.55639	-1	-4.42146
VIT_11s0016g04380	0.0658021	2.91839	-3.98089	-3.09954	-1.44746	-2.98089
VIT_19s0090g00040	-2.44746	0.450661	-2.07907	-2.64386	-2.87127	-4.14136
VIT_18s0072g00140	-1.80255	0.436517	-1.70526	-2.76939	-2.67423	-3.90689
VIT_19s0090g00030	-2.05889	0.604071	-0.962032	-2.8365	-2.73697	-3.32193
VIT_10s0116g01510	-1.55639	0.146221	-0.845114	-2.44746	-2.18442	-2.73697
VIT_07s0031g00390	-1	0.278976	-1.06895	-2.67423	-1	-2.90689
VIT_15s0021g00060	-0.0389941	0.00958605	-1.12029	-3.09954	-1	-2.64386
VIT_18s0122g01470	-1.18442	0.716625	-1.334	-3.42146	-1	-4.42146
VIT_05s0020g03200	2.67129	1.32577	-2.90689	-3.32193	-1	-1.30996
VIT_03s0038g00930	2.70856	1.39506	-2.52838	-3.37084	-1	-1
VIT_01s0026g00530	3.50758	1.8679	-2.76939	-3.37084	-1	-1
VIT_13s0019g04160	2.77681	1.76836	-3.47393	-4.32193	-1	-1
VIT_03s0110g00360	3.54556	1.5509	-3.01937	-4.32193	-1	-1
VIT_15s0046g01950	2.43207	2.74272	-3.37084	-3.58496	-1	-1
VIT_13s0084g00250	2.26404	0.278976	-3.76939	-2.8365	-1	-1
VIT_12s0059g00190	2.42044	0.938599	-4.22882	-2.5009	-1	-1
VIT_12s0059g01790	3.71991	2.66676	-5.22882	-3.90689	-1	-1
VIT_13s0064g00960	3.64655	3.07096	-4.05889	-4.32193	-1	-1
VIT_06s0004g02110	4.43207	2.3599	-3.47393	-2.90689	-1	-1
VIT_04s0044g01730	1.82239	2.20581	-5.05889	-2.64386	-1	-1.78588
VIT_02s0025g00320	2.12212	2.68032	-5.64386	-2.44746	-1	-1
VIT_04s0023g03750	1.44184	1.93985	-4.90689	-2.37084	-1	-0.240134
VIT_08s0032g00510	1.03562	2.62293	-4.42146	-3.8365	-1	-1
VIT_12s0057g00460	2.08179	3.46292	-4.14136	-2.05889	-1	-1
VIT_05s0020g01270	1.5294	4.50059	-3.37084	-2.80255	-1	-1
VIT_18s0072g00510	0.39689	0.690045	-3.64386	-3.8365	-1	-1.32193
VIT_17s0000g09160	-0.0291463	0.725378	-3.14136	-3.47393	-1	-1
VIT_18s0001g15240	-0.395929	1.43296	-3.64386	-4.05889	-1	-1
VIT_07s0005g02580	-0.681924	1.48714	-4.52838	-3.27462	-1	-1
VIT_06s0004g07210	-0.141356	1	-4.14136	-2.27462	-1	-1
VIT_03s0088g00650	0.363638	0.536053	-3.37084	-2.73697	-1	-0.65139
VIT_03s0038g04720	-0.0489096	3.12983	-3.76939	-2.5009	-1	-1
VIT_10s0003g02910	0.0519521	2.05889	-2.87127	-2.05889	-0.40864	-1.78588
VIT_12s0035g00020	-0.234465	2.31711	-4.90689	-1.04891	-1.62891	-1
VIT_18s0122g00790	0.278976	3.43962	-3.76939	-0.383329	-1	-1
VIT_18s0041g01270	1.71516	-0.721024	-3.18442	-1	-1	-1
VIT_01s0010g02660	2.04148	-0.614109	-2.80255	-1	-0.736966	-1.25154
VIT_19s0014g05010	2.38773	-0.217591	-2.76939	-1	-1	-1
VIT_13s0084g00380	1.92979	-1	-3.27462	-1	-1	-1.76939
VIT_14s0066g01790	1.60407	0.238787	-2.67423	-0.395929	-0.358454	-1.88897
VIT_15s0048g02780	2.33151	-0.00965017	-1.55639	-0.777608	-0.862496	-1.70526
VIT_02s0025g00730	2.40418	-0.447459	-1	-1	-1	-1
VIT_04s0008g03230	3.49825	-1	-1	-1	-1	-1
VIT_12s0028g03760	3.22805	0.133125	-1.59946	-1	-1	-1
VIT_15s0048g01210	3.62683	0.209973	-1	-1	-1	-1
VIT_07s0031g00490	2.20997	-0.487352	-1.54232	-2.05889	-0.577767	-1.62891
VIT_13s0074g00790	3.15812	-0.584963	-1.38333	-2.34618	-1	-1
VIT_16s0050g01890	3.04439	-1.20645	-2.34618	-2.12029	-1.62891	0.294743
VIT_01s0010g01650	1.23675	1.16135	-3.90689	-0.980891	-1.47393	-2.07907
VIT_13s0047g00200	1.29866	1.2162	-2.76939	-0.971431	-1.64386	-2.37084
VIT_13s0064g01370	2.24489	1.61667	-3.42146	-0.952694	-0.697437	-2.32193
VIT_16s0050g01830	1.22856	1.37851	-2.22882	-1.18442	-1.57061	-1.00965
VIT_14s0171g00050	1.94486	1.26903	-1.59946	-1.62891	-1.94342	-0.862496
VIT_01s0150g00500	2.0321	1.46641	-3.14136	-1	-1	-1
VIT_04s0023g00210	2.42671	2.21412	-2.87127	-1.48735	-1.2863	-1
VIT_09s0002g04380	3.36411	0.963474	-2.34618	-1.67423	-1.73697	-1.98089
VIT_14s0128g00210	3.3505	0.997594	-2	-1.42146	-1.96203	-2.18442
VIT_08s0040g01130	2.62215	0.62293	-2.87127	-2	-0.697437	-1.90689
VIT_06s0061g00970	3.69636	-1	-2.76939	-1	-1	-3.42146
VIT_12s0055g00180	0.119909	-0.125531	-2.32193	-0.777608	0.698959	-1.90689
VIT_12s0055g00160	1.4957	1.11326	-1.5009	-1.25154	1.22651	-1.32193
VIT_03s0063g01530	1.84666	-2.55639	-2.37084	-2.70526	-1	-1
VIT_12s0028g01360	1.36737	-2.55639	-2.5009	-1.4344	0.15056	-2.39593
VIT_11s0052g00420	2.36737	-3.14136	-3.76939	-1	-1	-1
VIT_11s0103g00040	3.38221	0.522725	-5.22882	-1	-1	-1
VIT_16s0100g00250	3.55582	1.66448	-4.76939	-1	-1	-1
VIT_18s0001g13460	3.50292	0.242857	-5.64386	-2.70526	-1	-1
VIT_16s0022g01450	4.33724	0.102098	-3.37084	-1	-1	-1
VIT_17s0000g06210	3.7366	2.39415	-3.76939	0.505891	-0.79419	-1.62891
VIT_02s0025g04330	4.75916	1.40418	-4.64386	-0.915936	0.997594	0.499102
VIT_18s0122g00280	0.801848	-1.20645	-5.42146	-1	-1	-1
VIT_08s0007g00880	0.468149	-1	-4.76939	-1	-1	-1
VIT_02s0025g00600	0.771181	-0.389615	-4.05889	-1	-1	-1
VIT_14s0108g01010	1.3599	-0.447459	-6.64386	-1	-1	-1
VIT_09s0002g04040	2.02148	-1.5009	-5.64386	-1	-1	-1
VIT_14s0066g00650	-0.745003	0.374808	-4.90689	-1	-1	-1
VIT_12s0055g01000	0.374808	0.0332762	-5.64386	0.333424	-1.334	-1.94342
VIT_14s0006g01670	1.62137	-4.22882	-6.22882	-1	-1	-1
VIT_09s0002g06110	3.15597	1.82375	-0.0995357	-1.52838	-5.64386	-2.42146
VIT_04s0008g00870	3.64655	1.3296	-0.240134	-1.32193	-5.64386	-2.25154
VIT_08s0007g00760	2.82579	1.62137	0.234706	-0.658963	-5.90689	-2.32193
VIT_18s0001g11300	3.27749	2.15164	-1.14136	-1.78588	-5.64386	-2.58496
VIT_18s0001g03610	3.10378	2.81079	-0.761213	-1.72102	-5.64386	-3.05889
VIT_04s0008g07040	1.94486	2.74416	-0.257275	-1.152	-6.22882	-2.14136
VIT_19s0014g02830	2.42939	2.62605	0.0379678	-1.4344	-5.64386	-2.8365
VIT_12s0059g02340	1.50758	2.52105	-0.473931	-1.39593	-5.64386	-3.22882
VIT_18s0001g10070	1.49228	1.95853	-0.943416	-0.934198	-5.90689	-2.29808
VIT_11s0016g02180	2.75773	2.35332	-0.728973	-0.599462	-6.64386	-3.47393
VIT_05s0020g03880	3.06752	3.33724	-0.65139	-1.03899	-7.22882	-3.52838
VIT_05s0077g02300	3.02444	0.739848	-1.2863	-1.48735	-5.42146	-3.52838
VIT_17s0000g00690	2.60486	1.1592	-1.1954	-0.184425	-5.90689	-2.98089
VIT_05s0102g00990	3.41459	2.22959	-0.871267	-2.61411	-5.90689	-4.05889
VIT_04s0008g01970	3.65268	2.24184	-0.104697	-2.64386	-6.22882	-4.52838
VIT_14s0219g00090	3.31179	2.49825	-0.327952	-1.47393	-5.90689	-4.14136
VIT_09s0002g02440	3.39872	2.31711	-1.4344	-2.58496	-4.90689	-3.98089
VIT_13s0019g02020	2.62605	2.75916	-0.713119	-2.58496	-4.76939	-3.64386
VIT_03s0038g00150	2.96532	1.82239	0.137504	-1.4344	-4.64386	-3.98089
VIT_01s0026g00710	3.01436	1.45943	0.759866	-1.90689	-5.05889	-3.14136
VIT_18s0122g00980	3.16404	2.96717	-0.0841604	-2.05889	-5.05889	-5.64386
VIT_03s0180g00150	3.64923	3.0761	0.707819	-2.01937	-5.22882	-5.22882
VIT_01s0011g05390	2.47422	2.41774	0.197446	-1.17354	-5.42146	-5.42146
VIT_14s0030g00230	2.22959	3.1021	-1.80255	-1.35845	-4.32193	-3.27462
VIT_10s0092g00150	2.75275	2.63459	-1.27462	-1.34618	-3.90689	-3.70526
VIT_17s0000g07690	2.47854	2.7984	-1.20645	-1.17354	-5.22882	-3.52838
VIT_07s0031g00020	2.73552	2.56965	-0.304006	-1.05889	-3.70526	-4.05889
VIT_07s0005g01300	3.53812	3.97728	-1.54232	-1.4344	-4.64386	-3.64386
VIT_10s0003g01050	3.25147	3.7977	-0.769387	-1.04891	-4.32193	-2.70526
VIT_06s0004g02390	3.23215	3.65268	-0.421464	-1.75309	-3.8365	-2.25154
VIT_05s0020g01070	3.63923	2.9855	-2.67423	-0.761213	-5.05889	-3.64386
VIT_18s0001g14170	1.18269	4.23445	-1.54232	-1.59946	-5.22882	-3.90689
VIT_04s0023g03360	1.74272	4.39712	-1.26303	-1.2863	-4.64386	-3.05889
VIT_06s0061g00070	1.36737	4.92979	-2.18442	-0.952694	-4.52838	-3.90689
VIT_02s0025g01220	2.05774	4.98033	-1.00965	-0.952694	-5.64386	-3.27462
VIT_17s0000g05570	1.85466	5.26416	-0.853779	-1.14136	-5.42146	-3.27462
VIT_13s0064g00520	1.39323	1.98429	-1.32193	-1.17354	-3.27462	-1.68966
VIT_01s0011g06410	1.87447	1.7977	-0.925038	-0.915936	-3.09954	-1.46063
VIT_07s0104g00470	1.94486	2.37016	-1.48735	-0.862496	-3.58496	-1.1954
VIT_01s0137g00400	2.12102	2.01673	-1.05889	-1.08927	-3.47393	-0.915936
VIT_08s0007g05240	2.36457	1.76129	-1.2863	-1.04891	-3.58496	-1.81943
VIT_18s0001g12970	2.23675	1.54926	-0.67423	-0.713119	-3.76939	-1.54232
VIT_13s0073g00530	1.89142	1.98429	-0.990414	-0.0588937	-3.64386	-1
VIT_18s0001g10900	1.85864	1.2162	-1.87127	-1	-3.09954	-1
VIT_02s0025g02720	1.86394	1.8679	-1.94342	-0.415037	-2.90689	-1.67423
VIT_11s0016g02970	1.40781	2.36083	-0.415037	-1.20645	-3.14136	-1.32193
VIT_11s0016g01460	2.09873	2.71443	-0.200913	-1.47393	-2.8365	-1.47393
VIT_18s0086g00180	1.48886	1.99518	-1.26303	-1.54232	-2.55639	-1.1954
VIT_07s0031g00520	2.94486	1.11991	-1.37084	-1.25154	-3.22882	-1
VIT_02s0025g02700	2.77961	1.79632	-0.584963	-1.09954	-2.44746	-1.16273
VIT_01s0026g00360	3.13313	2.42671	-0.769387	-0.666576	-2.98089	-1.04891
VIT_15s0048g00520	1.6009	2.15597	-0.14667	-0.819428	-3.98089	-0.952694
VIT_19s0014g02020	1.40962	2.34388	0.298658	-0.50772	-4.14136	-1.51457
VIT_02s0025g03450	2.1188	2.23368	0.367371	-1.07907	-3.90689	-1.65896
VIT_18s0001g09480	1.58336	1.93734	0.728283	0.0612002	-4.42146	-1.37084
VIT_11s0052g00160	2.43029	1.93483	0.278976	-0.473931	-4.05889	-0.592194
VIT_18s0086g00200	1.71516	0.948601	0.321928	-0.802554	-4.52838	-1.334
VIT_09s0002g01540	2.13532	1.55582	-0.40227	-0.65139	-4.64386	-1.00965
VIT_04s0044g01990	0.759866	2.52774	0.141869	-0.234465	-3.37084	-1.2863
VIT_07s0031g00940	0.464668	2.69302	-0.21201	-0.0943924	-3.42146	-0.67423
VIT_04s0008g05110	1.35238	2.10434	-0.168123	0.539366	-3.52838	-1.26303
VIT_18s0001g07930	1.35426	3.0835	-0.37707	0.298658	-3.70526	-1.57061
VIT_10s0003g01180	2.08179	0.801848	0.32577	-2.47393	-3.52838	-0.592194
VIT_18s0122g00750	2.08406	1.52105	-0.206451	-1.72102	-4.05889	-0.721024
VIT_12s0035g01720	1.15272	1	0.681074	-1.75309	-3.37084	-1.17354
VIT_07s0031g01460	1.43474	1.65992	0.933573	-1.8365	-4.64386	-1.73697
VIT_14s0066g00050	2.36364	2.06465	-1.35845	-1.68966	-4.76939	-0.802554
VIT_12s0057g00200	2.46467	2.38957	-0.990414	-1.334	-4.42146	-1
VIT_14s0030g00220	3.10936	1.91711	-0.228819	-1.98089	-5.05889	-1
VIT_07s0129g00070	2.67807	2.08746	0.275007	-2.03899	-4.64386	-0.494109
VIT_14s0081g00520	2.40962	1.94361	-1.13079	-2.25154	-4.32193	-2.09954
VIT_17s0000g04260	2.79632	2.32385	-0.769387	-2.16273	-4.05889	-2.5009
VIT_08s0007g08450	1.848	2.006	-0.40227	-1.51457	-4.64386	-1.94342
VIT_05s0102g00930	3.32912	1.8784	-0.853779	-1.34618	-3.76939	-2.64386
VIT_02s0087g00280	3.04789	2.37851	-1.04891	-1.06895	-3.58496	-2.67423
VIT_13s0067g01410	2.74344	2.45505	-0.487352	-0.681924	-3.22882	-2.42146
VIT_18s0001g09920	2.94298	0.701919	-0.577767	-1.38333	-3.58496	-2.07907
VIT_17s0000g01490	3.96131	0.975752	-0.21201	-0.952694	-3.27462	-2.22882
VIT_06s0009g01640	3.27898	1.08633	-1.334	-0.721024	-2.8365	-2.29808
VIT_06s0004g06910	3.97942	1.86394	-0.0790716	-1.67423	-2.73697	-2.98089
VIT_03s0017g02210	0.374808	2.9342	-0.827939	-2.27462	-3.42146	-0.827939
VIT_13s0019g01650	0.189034	2.05774	-0.563483	-1.24013	-3.47393	-0.862496
VIT_18s0001g06140	0.306457	2.7456	-1.39593	-1.16273	-2.67423	-1
VIT_12s0028g00940	1.16993	2.81558	-1.05889	-0.915936	-2.70526	-0.40227
VIT_17s0000g01890	1.666	3.37805	-1.72102	-0.802554	-3.22882	-1
VIT_04s0044g00500	0.83996	3.55008	-0.980891	-0.753085	-4.42146	-1.65896
VIT_10s0092g00360	1.32	4.40168	-0.434403	-0.880091	-3.09954	-1.30996
VIT_16s0022g00060	1.84666	3.63653	-0.370838	-1.03899	-2.18442	-1.38333
VIT_06s0061g00470	2.23368	2.31808	1.48886	-0.334001	-4.05889	-2.05889
VIT_13s0019g02640	3.26853	2.37295	1.27103	-0.549339	-3.70526	-2.90689
VIT_09s0002g08960	2.61196	3.38405	1.00959	0.363638	-4.90689	-2.94342
VIT_09s0002g01380	3.68594	3.16457	0.519374	-0.480626	-4.90689	-2.07907
VIT_15s0048g02680	3.26454	3.26604	1.21205	-0.168123	-4.64386	-1.152
VIT_04s0008g01740	2.67129	3.80254	1.57854	-0.352302	-4.32193	-1.47393
VIT_19s0014g00090	3.05369	3.88003	-0.228819	-0.50772	-4.64386	-1.30996
VIT_03s0038g01110	2.70782	2.98914	-0.286304	0.545968	-4.32193	-1
VIT_06s0004g02510	2.99156	3.54308	-0.79419	-0.053893	-3.98089	-0.79419
VIT_03s0063g02350	2.12212	5.02695	-1	0.461179	-3.52838	-1
VIT_10s0116g01680	2.63227	3.75275	0.555816	0.163499	-5.42146	-0.346176
VIT_17s0000g02420	3.93168	3.85798	1.4991	0.0285692	-5.64386	-0.141356
VIT_03s0063g00910	-0.50772	3.5097	0.172061	-2.44746	-3.58496	-2.87127
VIT_04s0023g03720	0.49228	3.75346	-0.0943924	-2.87127	-3.8365	-2.07907
VIT_19s0014g02150	0.329602	5.07496	-1	-2.44746	-4.64386	-2.8365
VIT_13s0019g03360	0.616671	4.003	0.218265	-2.47393	-5.22882	-0.853779
VIT_08s0007g03090	1.4489	3.20997	-1.81943	-2.55639	-3.8365	-2.8365
VIT_19s0015g01230	1.31615	3.44493	-1.70526	-3.22882	-2.73697	-2.39593
VIT_08s0040g00930	1.41504	4.95435	-1.61411	-1.81943	-2.70526	-2.87127
VIT_07s0129g01080	2.32385	4.04439	-1.05889	-2.55639	-3.8365	-0.915936
VIT_02s0025g04940	-1	4.3552	-0.37707	-1.24013	-4.90689	-4.76939
VIT_04s0008g06340	-0.157356	5.21101	-0.990414	-1.13079	-4.32193	-4.32193
VIT_06s0061g00520	-0.115077	5.31723	0.333424	-0.340075	-3.64386	-2.94342
VIT_19s0027g00010	1.28096	0.804604	-1.96203	-2.70526	-4.76939	-2.34618
VIT_16s0022g02310	1.09986	1.39872	-1.55639	-2.58496	-4.64386	-1.55639
VIT_19s0177g00200	1.18692	0.892715	-0.943416	-2.94342	-5.42146	-1.76939
VIT_08s0007g02440	0.644625	0.968398	-0.67423	-1.96203	-5.05889	-1.39593
VIT_16s0098g01560	0.102098	0.39689	-2.05889	-2.80255	-5.05889	-1.61411
VIT_07s0005g01840	1.89271	1.16135	-2.18442	-2.03899	-5.42146	-1.5009
VIT_11s0037g00320	2.12212	1.45242	-2.47393	-2.8365	-5.05889	-1
VIT_03s0038g01330	2.20477	0.87709	-0.853779	-2.87127	-6.64386	-3.01937
VIT_14s0060g02330	2.27103	0.707819	-0.37707	-2.42146	-5.64386	-2.29808
VIT_19s0015g01150	2.22651	0.656878	-1.25154	-1.94342	-6.64386	-1.65896
VIT_19s0027g01110	1.72538	-0.40227	-0.14667	-1.37084	-4.64386	-2.87127
VIT_02s0012g00320	1.22651	0.242857	-0.125531	-1.21759	-5.22882	-1.64386
VIT_04s0008g00620	2.42761	-0.298081	-1	-1	-5.22882	-1
VIT_11s0016g00220	0.619804	0.128733	-3.52838	-3.70526	-5.64386	-0.785875
VIT_06s0061g00850	1.17206	0.604071	-3.22882	-3.47393	-5.64386	-1.21759
VIT_13s0019g01930	0.0749621	-0.68966	-3.64386	-4.05889	-6.64386	-1
VIT_04s0008g05450	0.584963	0.15056	-1.92504	-3.18442	-6.22882	-0.643856
VIT_09s0002g06880	0.62605	0.616671	-2.20645	-2.98089	-6.22882	-0.67423
VIT_04s0079g00230	0.552541	0.329602	-2.39593	-2.61411	-7.22882	-0.434403
VIT_12s0121g00380	1.15056	0.34861	-3.52838	-1.76939	-5.90689	-1
VIT_14s0060g01420	1.6151	0.908172	-0.315929	-2.67423	-5.22882	1.48543
VIT_17s0053g00700	2.24793	1.71663	-0.971431	-1.48735	-5.64386	0.815575
VIT_18s0089g00700	2.29964	1.41323	-0.802554	-3.09954	-6.64386	0.393233
VIT_14s0066g00120	1.78101	1.45943	-1.98089	-2.76939	-8.22882	-2.76939
VIT_18s0001g02060	1.31034	3.40008	-2.07907	-2.34618	-7.22882	-1
VIT_07s0129g00370	2.43474	2.68182	-3.14136	-2.14136	-5.05889	-2.94342
VIT_03s0091g01080	2.85333	2.67732	-3.58496	-1.85378	-4.64386	-2.16273
VIT_18s0001g14490	1.70487	2.73913	-3.70526	-1.2863	-4.22882	-2
VIT_12s0057g00500	2.66297	2.97453	-3.76939	-1.13079	-3.47393	-2.22882
VIT_09s0096g00270	1.3599	0.745596	-5.42146	-2.25154	-4.52838	-1
VIT_18s0001g15260	2.1088	1.1592	-4.14136	-1	-4.64386	-1
VIT_14s0068g00150	3.85931	1.60407	-2.58496	-2.87127	-4.90689	-1
VIT_09s0002g06750	3.70782	2.53024	-3.05889	-3.05889	-4.52838	-1
VIT_03s0038g03600	3.35003	1.70192	-3.18442	-3.32193	-3.42146	-1
VIT_18s0001g13390	4.31687	1.0612	-2.42146	-2.87127	-3.14136	-1
VIT_19s0090g01050	2.37481	0.214125	-2.52838	-2.5009	-3.58496	-0.728973
VIT_04s0008g02570	2.58976	2.52273	-2.22882	-2.67423	-2.67423	-1.25154
VIT_19s0014g00680	3.003	2.35426	-2.61411	-1.85378	-2.61411	-0.40864
VIT_18s0001g12900	2.60328	2.13313	-1.40864	-2.58496	-2.87127	0.719549
VIT_19s0014g02350	2.32673	0.193246	-3.42146	-3.90689	-4.42146	-2.61411
VIT_09s0002g08650	3.75631	0.799087	-4.22882	-2.94342	-4.90689	-1.90689
VIT_01s0010g03060	3.04089	-0.184425	-5.64386	-3.64386	-4.76939	-1
VIT_04s0008g03090	3.3599	0.471621	-1.90689	-5.22882	-3.8365	-1.32193
VIT_04s0008g01830	3.92537	0.847997	-1.22882	-3.76939	-4.52838	-3.42146
VIT_04s0023g01330	2.28787	2.15812	-1.13079	2.42223	-5.22882	-0.115077
VIT_07s0031g00040	2.32673	-0.621488	-0.104697	-2.61411	-3.32193	-1.26303
VIT_14s0036g01350	2.48886	-1.02915	-0.0790716	-1.85378	-2.98089	-1.152
VIT_11s0016g00540	2.91648	-0.40864	0.450661	-1.64386	-2.73697	-0.769387
VIT_14s0066g01730	2.68332	-1.68966	-0.315929	-2.32193	-3.52838	-2.01937
VIT_07s0031g02990	2.97881	0.565597	0.278976	-3.01937	-3.98089	-1.94342
VIT_10s0003g00780	3.53149	-0.0943924	0.167786	-3.64386	-2.76939	-0.761213
VIT_15s0024g01270	1.75987	-0.862496	0.536053	-3.27462	-4.42146	-0.577767
VIT_02s0087g00060	1.91839	-0.606767	1.04264	-2.55639	-4.05889	0.572081
VIT_14s0006g02170	1.7137	-2.16273	0.184809	-2.76939	-5.42146	-2.98089
VIT_19s0027g00310	0.344828	-2.73697	0.542671	-3.90689	-3.37084	0.0840643
VIT_06s0061g01480	-0.395929	-1.72102	0.432959	-2.70526	-3.98089	0.782409
VIT_04s0008g01860	-1.24013	-2.12029	0.0612002	-2.34618	-2.73697	-0.421464
VIT_18s0166g00230	0.659925	-2.32193	-0.584963	-2.16273	-2.44746	-0.37707
VIT_07s0005g01210	-0.120294	-0.280451	0.495695	-2.58496	-5.22882	0.314213
VIT_08s0007g08460	-0.67423	1.32385	0.968398	-3.01937	-3.64386	0.209973
VIT_18s0001g12620	-1.00965	0.713696	-0.592194	-1.05889	-3.58496	-5.42146
VIT_18s0001g05990	-1.35845	0.0332762	-0.0489096	-1.47393	-2.01937	-5.64386
VIT_15s0046g03080	-1.2863	0.847997	-2	-0.120294	-1	-5.22882
VIT_04s0069g00740	-1	1.25902	-1	-0.257275	-0.880091	-5.90689
VIT_16s0039g00290	-2.16273	0.0749621	-1	-2.52838	-1	-6.64386
VIT_14s0128g00600	-2.73697	1.05658	0.294743	-0.761213	-1	-3.8365
VIT_04s0008g00230	-2.18442	0.895303	0.218265	-0.862496	-1	-3.05889
VIT_01s0127g00750	-2.87127	2.59932	-0.152003	-0.745003	-3.18442	-5.05889
VIT_17s0000g04090	1.20581	1.50927	-3.05889	0.485427	-0.370838	-4.22882
VIT_08s0056g01070	1.46989	1.37295	-2.8365	0.62293	-0.286304	-3.22882
VIT_19s0014g00510	0.0976108	0.933573	-2.39593	0.847997	-0.245825	-2.70526
VIT_06s0004g00020	0.619804	1.23675	-1.57061	0.20581	0.762703	-2.90689
VIT_03s0097g00110	-0.152003	1.25096	-2.5009	0.874469	-0.17897	-5.64386
VIT_03s0063g01140	0.913288	1.63691	-3.27462	0.246915	0.404177	-5.22882
VIT_09s0070g00560	-1.65896	1.09536	-3.18442	0.137504	-0.888969	-4.52838
VIT_13s0019g03120	-1.90689	2.15164	-3.70526	0.242857	-0.0242475	-3.52838
VIT_09s0002g06260	-2.32193	2.02857	-2.37084	1.25096	0.647698	-4.90689
VIT_19s0090g01010	-1	2.32193	-1.1954	1.28491	-1	-4.42146
VIT_12s0134g00380	-0.761213	2.26003	-1.38333	1.37851	-0.389615	-2.90689
VIT_12s0134g00340	-0.280451	2.48971	-1.1954	1.67807	-0.21201	-2.64386
VIT_12s0134g00280	-0.925038	2.50674	-0.810966	1.91711	-0.157356	-2.32193
VIT_08s0056g01650	-1	2.73408	-1.46063	1.09761	-1	-1
VIT_02s0025g04230	-2.03899	2.44449	-1	2.25399	0.0840643	-1
VIT_14s0060g00450	0.32577	3.58376	-1.75309	1.64	1.29082	-4.14136
VIT_10s0116g01880	0.31034	2.26704	-0.836501	0.992768	1.36737	-3.14136
VIT_18s0001g11580	-0.223194	3.0072	-0.245825	1.75132	1.50589	-1.96203
VIT_17s0119g00150	-1	-1.1954	4.67148	3.38267	0.815575	-2.76939
VIT_04s0008g05350	-0.268817	-1.37084	2.1964	0.5025	2.10098	-2.87127
VIT_03s0063g00460	-0.990414	-0.721024	3.42447	1.38773	1.3599	-2.25154
VIT_06s0080g00170	1.24489	0.539366	0.407806	0.887525	1.58015	-2.22882
VIT_18s0041g01290	0.197446	-0.115077	1.67957	0.793549	0.613532	-2.12029
VIT_10s0003g00590	0.176323	0.565597	2.06465	1.38589	1.15272	-2.07907
VIT_05s0049g00790	-0.0841604	1.48199	0.736966	-0.125531	2.98671	-1.92504
VIT_05s0049g00810	0.5025	2.08972	1.34293	0.900464	4.00988	-2.18442
VIT_05s0020g00680	0.616671	1.16135	0.542671	-0.37707	-5.22882	-0.395929
VIT_11s0016g04590	0.995183	1.16993	0.995183	0.826464	-5.05889	-1.18442
VIT_07s0031g02740	1.57854	0.931053	2.15597	-0.17897	-4.76939	-0.17897
VIT_02s0025g03640	-0.658963	1.59773	1.04031	0.447138	-3.18442	0.0426443
VIT_13s0320g00020	0.728283	1.40781	0.850666	0.172061	-3.98089	-0.0144996
VIT_04s0044g00060	0.516015	2.25802	1.14622	0.773996	-3.37084	-0.697437
VIT_04s0008g05710	2.64309	1.48543	1.74416	1.41864	-4.14136	-1.35845
VIT_13s0019g03550	1.08633	2.68631	2.66372	1.93357	-2.94342	-1.55639
VIT_16s0039g01710	-1.152	-0.971431	1.37481	-1.24013	-2.37084	-0.104697
VIT_09s0002g02610	-0.37707	-0.728973	2.45681	-0.853779	-1.98089	1.17206
VIT_01s0010g00450	-0.467267	-0.980891	1.93734	-0.487352	-2.05889	1.75275
VIT_11s0052g00530	-0.0588937	-0.421464	0.226509	0.393233	-2.58496	0.176323
VIT_16s0050g00990	-0.340075	-0.753085	1.15704	0.298658	-1.8365	0.672048
VIT_13s0019g03180	-0.810966	0.559084	0.751321	-0.257275	-2.80255	1.39506
VIT_13s0158g00320	-0.383329	1.11991	1.36364	-0.1899	-2.25154	0.635367
VIT_05s0077g01330	-0.785875	0.0703893	1.90945	0.568843	-2.80255	0.39689
VIT_11s0016g00880	1.67054	-0.115077	1.12653	-0.681924	-3.64386	-0.606767
VIT_06s0004g07910	1.32577	0.321928	0.422233	-0.0291463	-2.52838	-0.263034
VIT_08s0056g00050	1.97331	0.389567	0.796321	-0.268817	-2.70526	-0.268817
VIT_16s0100g00330	2.20163	1.04731	1.01911	-0.556393	-3.09954	-0.681924
VIT_04s0044g01740	2.17206	1.42223	-0.358454	-0.943416	-3.37084	-0.0144996
VIT_07s0129g01070	2.49228	1.27302	0.389567	-1.02915	-3.18442	-0.315929
VIT_19s0015g00860	3.03034	0.931053	0.0885939	-0.658963	-3.18442	-0.549339
VIT_11s0016g05790	0.890122	0.568843	0.695994	-2.44746	-2.32193	0.39689
VIT_06s0004g00050	0.793549	0.785202	0.522725	-1.58496	-2.39593	-0.17897
VIT_01s0011g05310	1.67657	0.0749621	0.719549	-2.16273	-1.5009	0.371094
VIT_11s0016g05800	1.83188	1.08406	1.12653	-1.92504	-3.18442	0.861294
VIT_07s0005g05510	1.18903	1.95606	0.41864	-0.906891	-2.52838	0.374808
VIT_08s0007g02450	1.89918	0.562344	2.25701	1.16564	-1	-0.115077
VIT_17s0000g03910	0.665999	0.41864	1.65688	-0.836501	-2.05889	1.53771
VIT_01s0011g00750	0.995183	1.47854	0.897886	-0.681924	-1.06895	1.89012
VIT_16s0098g00990	2.31421	0.85599	1.11991	-0.753085	-1.94342	0.522725
VIT_02s0012g01670	2.276	0.85333	1.03562	-0.0892673	-1.65896	-0.0639118
VIT_07s0151g00700	1.27501	1.52105	1.90304	0.0976108	-2.32193	0.447138
VIT_09s0002g03390	1.2162	0.978196	1.05195	0.337235	-1.92504	0.799087
VIT_01s0010g03470	1.20581	0.725378	1.78381	0.222392	-1.88897	1.04731
VIT_10s0003g00790	-1.32193	-0.862496	-0.327952	0.267036	-0.736966	-1.81943
VIT_14s0128g00700	-1.07907	-0.440916	-0.0439433	0.193246	-0.340075	-1.14136
VIT_12s0034g01230	-1.08927	-0.570607	0.0795203	1.0612	-0.728973	-1.61411
VIT_05s0049g00270	-1.21759	0.201634	-0.251539	0.259021	-0.736966	-2.03899
VIT_02s0025g00980	-0.827939	-0.447459	-0.00965017	0.00480099	-1.4344	-1.29808
VIT_14s0060g00200	-0.440916	-0.480626	-0.528379	0.20581	-1.00965	-1.29808
VIT_07s0197g00230	-1.1954	-1.47393	-0.206451	0.532733	-0.184425	-2.47393
VIT_13s0019g04880	-0.321928	-1.57061	-1.18442	0.545968	-1.152	-0.666576
VIT_19s0014g02620	-0.745003	-1.44746	-0.50772	0.834576	-0.862496	-1.5009
VIT_19s0014g04750	-0.980891	-1.5009	-0.228819	0.5025	-1.8365	-0.897902
VIT_06s0080g00120	-1.44746	-1.59946	0.102098	-0.389615	-1.47393	-1.61411
VIT_18s0117g00360	-0.79419	-1.44746	0.443607	-0.915936	-1.26303	-0.487352
VIT_14s0108g01530	-1.61411	-0.980891	-0.802554	0.0658021	-0.395929	-0.728973
VIT_18s0041g01330	-1.06895	-1.13079	-0.721024	0.234706	-0.115077	-0.777608
VIT_10s0092g00130	-1.10988	-0.606767	-0.925038	-0.00481702	0.15056	-0.980891
VIT_18s0001g15340	-1.29808	-1.152	-0.535332	0.385891	0.568843	-0.599462
VIT_16s0050g02510	-1.8365	-1.96203	-0.480626	0.0976108	-0.454032	-0.286304
VIT_08s0040g02730	-1.81943	-1.55639	-0.962032	0.318076	1.24691	-1.02915
VIT_04s0008g05700	-2.37084	-1.01937	-0.65139	0.762703	1.32577	-1.29808
VIT_15s0045g00640	-2.09954	-1.03899	0.0191088	0.903038	0.77961	-0.925038
VIT_16s0100g01040	-1.72102	-1.39593	-0.480626	-1.59946	0.286881	-0.500898
VIT_19s0090g00120	-1.72102	-1.76939	0.254997	-0.862496	0.539366	-1.08927
VIT_08s0007g01230	-1.334	-1.47393	-0.753085	-0.549339	1.6584	-0.440916
VIT_17s0119g00300	-0.713119	-0.200913	-1.65896	0.290818	-0.184425	-1.52838
VIT_12s0034g01030	-0.769387	0.0379678	-1.46063	0.263034	-0.37707	-1.32193
VIT_08s0058g00040	-0.389615	-0.136062	-1.51457	0.0795203	-0.257275	-1.87127
VIT_13s0047g01010	-0.542318	-0.0588937	-0.862496	0.475085	-0.195396	-1.46063
VIT_03s0063g02230	-1.10988	0.242857	-1.1954	0.39689	0.163499	-1.80255
VIT_09s0002g04370	-1.00965	0.242857	-1	-0.200913	0.0143553	-1.16273
VIT_03s0088g01130	-1.04891	0.222392	-0.542318	-0.421464	-0.352302	-0.705257
VIT_14s0081g00270	-1.01937	0.363638	-1.65896	0.532733	0.306457	-0.943416
VIT_15s0024g01620	-0.528379	0.790772	-1.40864	0.230613	0.539366	-1.03899
VIT_14s0068g02080	-0.0943924	0	-1.04891	0.512648	0.890122	-1.00965
VIT_04s0044g00660	-1.58496	-0.427919	-1.08927	-0.570607	0.650765	-1.54232
VIT_12s0035g01770	-2	0.653824	-0.65139	-0.494109	-0.0439433	-0.745003
VIT_12s0028g00860	-2.12029	0.481988	-1.21759	-0.240134	0.337235	-0.240134
VIT_16s0013g00300	-1	0.39689	-0.728973	-1.96203	-0.251539	-1.17354
VIT_14s0066g02180	-0.880091	0.559084	-1.02915	-1.16273	0.172061	-1.37084
VIT_02s0025g03170	-0.298081	0.529405	-0.0389941	-0.053893	0.329602	-2.01937
VIT_07s0197g00040	-1.24013	-0.304006	0.393233	0.0565835	1.17845	-1.61411
VIT_08s0007g03650	-0.570607	-1.03899	-1.00965	1.76977	0.995183	-0.962032
VIT_07s0005g00600	-1.1954	-0.614109	-0.274622	0.128733	0.41864	-0.383329
VIT_12s0059g00790	-0.971431	-0.52146	-0.421464	0.321928	0.447138	0.0885939
VIT_12s0057g00640	-0.810966	-0.666576	-0.1899	0.519374	-0.0689474	-0.157356
VIT_16s0039g01890	-0.906891	0.267036	-0.427919	-0.0841604	0.128733	-0.152003
VIT_01s0010g00730	-0.713119	-0.120294	0.0143553	0.263034	0.246915	-0.257275
VIT_10s0003g04330	-0.705257	-0.17897	-0.427919	0.415037	0.352382	0
VIT_17s0000g06500	-0.500898	-0.0340618	-0.206451	0.457682	0.499102	-0.21201
VIT_09s0002g01830	-0.643856	-0.00481702	-0.0995357	0.422233	0.440066	0.154886
VIT_10s0116g00240	-0.542318	0.298658	-0.0740006	0.282934	0.773996	-0.228819
VIT_17s0000g06480	-0.705257	-0.257275	0.119909	0.555816	0.887525	-0.053893
VIT_14s0060g01700	-1.35845	-0.0995357	0.302563	0.532733	0.736966	0.20581
VIT_08s0056g00300	-0.785875	-0.897902	-0.352302	-0.473931	0.59773	-0.280451
VIT_10s0003g02630	-0.745003	-0.556393	0.385891	-0.115077	-0.0943924	-0.315929
VIT_05s0062g01290	-0.962032	-0.577767	0.539366	-0.195396	-0.00481702	0.128733
VIT_18s0072g00980	-1.07907	-0.906891	0.710761	0.382206	-0.125531	-0.298081
VIT_12s0059g02500	-1.24013	-0.321928	-0.862496	0.141869	0.731183	-0.454032
VIT_02s0025g04980	-0.906891	-0.0489096	-0.383329	0.47854	1.13313	-0.621488
VIT_18s0089g00520	-1.90689	0.250962	-0.871267	0.863938	0.858644	-0.40227
VIT_10s0042g00440	-1.2863	0.552541	-0.697437	0.62605	1.02148	-0.263034
VIT_13s0019g00690	-1.18442	0.684071	0.189034	-0.130787	1.08859	0.575312
VIT_18s0001g15730	-1.47393	-0.681924	1.11991	1.03797	1.6151	0.209973
VIT_02s0025g04670	-1.47393	-0.606767	0.895303	1.84398	0.91584	0.41864
VIT_18s0001g01960	0.180572	-0.871267	0.176323	0.900464	0.687061	-0.206451
VIT_18s0041g02180	0.321928	-0.606767	-0.0639118	1.64923	0.913288	0.159199
VIT_03s0063g01780	-0.606767	-0.943416	0.584963	0.807355	0.246915	-0.0340618
VIT_18s0122g00840	-0.897902	-0.836501	0.246915	0.771181	0.687061	0.137504
VIT_19s0177g00160	-0.962032	-1.12029	0.647698	1.09085	1.05658	0.218265
VIT_01s0011g03850	-0.528379	-0.487352	0.63846	1.05889	0.884923	-0.315929
VIT_18s0001g01070	-0.274622	-0.157356	0.644625	0.693022	0.436517	0.0519521
VIT_18s0122g00360	-0.880091	-0.206451	0.146221	1.0681	1.93734	0.209973
VIT_18s0122g01270	-0.599462	-0.286304	-0.21201	0.385891	1.61196	0.719549
VIT_12s0055g01280	-0.906891	-0.542318	0.226509	1.13093	1.19114	0.359896
VIT_16s0100g01010	-0.836501	-0.761213	-0.104697	0.641546	1.46641	0.471621
VIT_10s0116g01240	-1.03899	-0.67423	0.146221	0.81284	1.46989	0.757023
VIT_18s0001g07610	0.344828	-0.292181	-1.42146	-0.494109	0.159199	0.0795203
VIT_18s0001g03390	0.0885939	-0.421464	-0.990414	-0.0740006	0.485427	-0.206451
VIT_08s0007g07890	-0.168123	0.275007	-1.35845	-0.40864	0.374808	-0.0639118
VIT_19s0090g00240	0.936088	0.0976108	-0.836501	-0.556393	0.00480099	0.222392
VIT_11s0016g04640	0.197446	0.128733	-0.14667	-0.480626	-0.00481702	0.5025
VIT_18s0001g03310	0.378512	0.684071	-1.334	0.698959	-0.37707	0.371094
VIT_18s0001g07310	0.282934	0.167786	-1.73697	0.20581	1.12873	0.78799
VIT_19s0090g01090	0.801848	0.00958605	-0.934198	0.0473057	0.958533	0.85599
VIT_09s0002g08540	-0.0340618	-0.0389941	-0.556393	0.519374	0.826464	1.44714
VIT_17s0000g04370	0.549258	-0.217591	-0.0943924	0.59136	0.687061	0.59773
VIT_07s0031g01070	0	-0.334001	-0.141356	0.965938	0.956057	0.975752
VIT_01s0011g03960	0.298658	0.0332762	-1.76939	-1.334	-1.5009	0.176323
VIT_03s0063g00730	0.254997	0.936088	-2.37084	-0.915936	-0.880091	0.214125
VIT_03s0088g00300	0.230613	0.20581	-2.03899	-1.47393	-0.228819	-0.383329
VIT_01s0010g03980	-0.0689474	0.707819	-1.46063	-1.35845	-0.152003	-0.487352
VIT_04s0044g01460	-0.104697	0.294743	-1.5009	-2.14136	-0.643856	0.754175
VIT_13s0064g01250	-0.346176	0.0885939	-1.02915	-1.32193	-0.745003	0.464668
VIT_10s0042g01240	-0.370838	-1.10988	-2.14136	-1.2863	-1.51457	0.159199
VIT_04s0008g02070	-1.38333	1.0048	-1.16273	-1.72102	-0.925038	-0.00481702
VIT_01s0011g06500	-1.26303	0.522725	-0.0340618	-1.54232	-1	0.49228
VIT_17s0000g03230	-0.434403	-1.10988	-0.67423	-1.20645	-0.549339	0.837271
VIT_03s0017g02140	-0.268817	-0.952694	-0.542318	-1.06895	-0.592194	0.41864
VIT_18s0001g02790	-0.21201	-0.614109	0	-0.971431	-0.234465	0.722466
VIT_14s0068g00090	-0.971431	-1.14136	-1	-1.01937	-0.962032	0.0473057
VIT_04s0008g01650	-0.421464	-0.952694	-1.152	-0.658963	0.102098	1.53605
VIT_17s0000g07400	0.425817	-1.334	-0.962032	-0.79419	-1.96203	0.404177
VIT_09s0002g02990	-0.0489096	-0.577767	-0.1899	-0.447459	-1.5009	0.81284
VIT_01s0011g03950	0.604071	-0.0740006	-0.721024	-0.925038	-1.35845	0.716625
VIT_05s0062g00700	0.468149	-0.14667	0.0840643	-1.61411	-1.14136	1.19954
VIT_15s0021g01140	1.03797	0.124328	-0.370838	-1.59946	-0.736966	0.464668
VIT_11s0016g05280	-0.454032	-0.697437	-0.514573	-2.70526	-1	0.275007
VIT_16s0050g00010	-0.268817	-1.32193	-0.14667	-2.37084	-1.65896	1.99398
VIT_06s0004g02490	-0.514573	0.15056	-0.888969	-1.29808	-0.880091	-1.16273
VIT_11s0016g04090	0.0332762	0.653824	-0.454032	-1.39593	-1.17354	-1.2863
VIT_12s0035g00200	-0.268817	0.124328	-0.528379	-1.334	-1.72102	-1.85378
VIT_07s0095g00780	0.321928	0.9855	-1.26303	-1.4344	-1.65896	-1.94342
VIT_03s0017g00610	0.111031	0.850666	-1.05889	-0.785875	-1.4344	-1.48735
VIT_05s0051g00490	0.374808	0.826464	-1.30996	-1.61411	-1.16273	-1.07907
VIT_17s0000g01960	0.400538	0.318076	-1.92504	-1.64386	-1.81943	-1.27462
VIT_02s0025g02850	0.440066	0.0840643	-1.35845	-1.67423	-2.05889	-1.2863
VIT_16s0050g02720	0.669027	-0.415037	-0.810966	-1.78588	-1.92504	-1.00965
VIT_01s0011g00030	0.382206	0.193246	-1.98089	-1.14136	-0.577767	-1.48735
VIT_09s0002g03130	0.189034	-0.0242475	-1.67423	-1.06895	-0.454032	-1.38333
VIT_10s0003g04280	0.581753	0.0840643	-1.81943	-0.810966	-1.02915	-1.26303
VIT_19s0090g00670	0.141869	-0.321928	-1.54232	-0.871267	-0.971431	-1.58496
VIT_13s0156g00540	0.604071	0.189034	-1.39593	-0.584963	-0.836501	-1.22882
VIT_05s0077g02120	0.509274	0.382206	-1.24013	-0.184425	-0.888969	-1.2863
VIT_09s0054g01570	1.0024	0.782409	-1.48735	-0.234465	-0.721024	-1.09954
VIT_18s0001g05380	0.87709	0.656878	-1.90689	-0.352302	-1.37084	-1.62891
VIT_13s0156g00500	0.613532	0.0519521	-0.745003	-0.713119	-1.08927	-0.853779
VIT_03s0038g01620	1.09311	0.0795203	-0.862496	-0.915936	-1.09954	-0.810966
VIT_07s0129g00700	1.64616	0.333424	-1	-1	-1	-1
VIT_08s0058g00960	1.31808	-1	-1	-1	-1	-1
VIT_15s0046g01060	0.271027	0.562344	-1.334	-0.0340618	-1.67423	-1.29808
VIT_06s0004g03340	0.47854	0.238787	-0.990414	0.184809	-1.57061	-1.80255
VIT_12s0034g02400	0.552541	1.04031	-1.25154	0.0658021	-1.48735	-1.80255
VIT_19s0014g05160	0.869213	0.823749	-1.26303	0.519374	-0.915936	-1.96203
VIT_13s0139g00130	0.555816	0.804604	-0.454032	0.0612002	-1.22882	-1.4344
VIT_11s0016g03360	1.04264	1.19535	-0.37707	0.509274	-1.00965	-1.42146
VIT_13s0084g00510	0.701919	0.759866	-0.0242475	0.363638	-0.736966	-1.96203
VIT_12s0059g00110	0.662965	1.58336	-0.0892673	0.0749621	-1.40864	-1.72102
VIT_05s0049g02310	0.771181	0.106572	-0.606767	-0.827939	-1.30996	-1.80255
VIT_19s0085g01010	0.0379678	0.282934	-0.434403	-0.606767	-1.12029	-1.73697
VIT_09s0002g06490	0.271027	0.167786	-0.500898	-0.257275	-0.37707	-2.09954
VIT_18s0001g09160	0.751321	0.378512	0.0519521	-0.40864	-0.802554	-2.37084
VIT_01s0011g00930	0.440066	1.1635	-0.606767	-0.292181	-0.542318	-2.14136
VIT_08s0040g01550	0.644625	-0.125531	-0.614109	0.488858	-0.736966	-1.17354
VIT_08s0040g01540	0.785202	0.106572	-0.906891	1.16993	-0.528379	-1.62891
VIT_15s0046g03660	0.687061	0.275007	-0.274622	-0.352302	-0.0892673	-1.30996
VIT_05s0020g02230	0.834576	0.159199	0.0426443	0.234706	-0.40864	-1.16273
VIT_10s0042g00370	1.12653	0.447138	-0.184425	0.214125	0.115477	-1.80255
VIT_11s0052g01430	-0.120294	0.565597	-0.251539	0.271027	-1.07907	-1.09954
VIT_13s0074g00680	0.0519521	0.329602	-0.321928	0.184809	-0.853779	-1.06895
VIT_08s0007g01820	-0.251539	0.690045	-0.315929	-0.0639118	-0.880091	-0.761213
VIT_17s0000g06090	-0.234465	0.422233	-0.697437	0.242857	-0.681924	-1.20645
VIT_13s0064g01000	-0.141356	0.588165	0.201634	-0.621488	-1.4344	-0.584963
VIT_09s0002g04670	0.440066	0.900464	-0.0389941	-0.745003	-1.09954	-0.862496
VIT_13s0064g01020	-0.514573	1.09761	-0.636362	-0.67423	-0.628906	-0.0943924
VIT_14s0083g00440	-0.228819	1.19535	-0.434403	-0.52146	-0.370838	-0.658963
VIT_07s0255g00040	-0.40864	1.14405	-0.383329	-0.173536	-0.141356	-0.168123
VIT_04s0023g03670	-0.120294	1.42582	-0.460634	-0.0242475	-1.18442	-0.614109
VIT_05s0094g00420	-0.268817	1.47162	-0.67423	0.0658021	-0.447459	-0.68966
VIT_15s0021g00210	0.222392	0.616671	-0.364633	-1.00965	-0.298081	-0.636362
VIT_14s0171g00080	0.31034	0.845323	-0.962032	-0.681924	-0.109878	-0.395929
VIT_04s0210g00120	-0.40227	0.961006	0.0658021	-0.053893	-0.785875	-1.62891
VIT_19s0015g01780	-0.68966	0.776806	0.613532	0.0612002	-0.570607	-1.51457
VIT_08s0040g02920	-0.358454	0.961006	0.271027	-0.440916	-0.309955	-0.753085
VIT_06s0061g01450	-0.0892673	1.36177	0.422233	0.0931094	-0.223194	-0.962032
VIT_10s0071g00070	-1	1.43652	0.429393	-0.636362	-1	-0.871267
VIT_08s0007g02740	-0.542318	1.84532	-0.0144996	-0.500898	-0.666576	-0.897902
VIT_14s0219g00050	0.106572	1.62761	0.59773	-1.61411	-1	-1.40864
VIT_05s0020g02760	-0.00965017	1.30061	0.0426443	-1.16273	-0.440916	-1.40864
VIT_11s0052g00840	0.163499	0.298658	0.754175	-1.61411	-0.810966	-1.07907
VIT_14s0171g00060	-0.315929	1.1592	-1.90689	-0.636362	-1.03899	-2.22882
VIT_01s0011g01850	-0.542318	0.635367	-1.14136	-0.67423	-0.658963	-2.07907
VIT_01s0011g00150	-0.606767	0.701919	-2.22882	-0.549339	-0.810966	-1.42146
VIT_11s0037g00480	0.0840643	0.823749	-1.5009	-1.03899	0.00958605	-1.87127
VIT_19s0014g04080	-0.460634	0.111031	-1.80255	-1.152	-1.14136	-2.58496
VIT_17s0000g08960	0.0931094	0.532733	-1.05889	-1.16273	-1	-2.70526
VIT_13s0158g00400	-0.810966	0.450661	-1.54232	-0.053893	-1.62891	-2.8365
VIT_19s0085g00440	-0.298081	0.572081	-1.24013	-0.427919	-1.87127	-2.80255
VIT_13s0019g03060	-1.00965	1.1635	-1.30996	-0.500898	-1.334	-3.42146
VIT_08s0056g00870	-1.02915	0.39689	-0.666576	-0.827939	-1.58496	-1.44746
VIT_02s0025g00780	-0.845114	0.545968	-0.535332	-0.785875	-1.12029	-1.68966
VIT_04s0044g01610	-1.34618	0.133125	-1.21759	-0.298081	-1.52838	-1.334
VIT_03s0091g00950	-1	0.938599	-1	-1	-1	-1
VIT_11s0103g00010	-0.681924	1.39689	-1.5009	-0.769387	-1	-1
VIT_05s0077g01960	-1.17354	1.36177	-1.88897	-0.577767	-1.58496	-1.80255
VIT_07s0031g01770	-1.72102	1.20581	-1.37084	0.163499	-0.713119	-2.22882
VIT_14s0030g01200	-0.769387	1.63382	-1.10988	0.62293	-0.971431	-1.59946
VIT_14s0128g00510	1.24691	0.0191088	0.0379678	-0.943416	-1.76939	-1.68966
VIT_09s0002g08290	1.09986	0.230613	0.214125	-0.705257	-1.38333	-1.48735
VIT_01s0011g05220	0.716625	0.461179	0.344828	-1.18442	-1.64386	-1.55639
VIT_19s0014g00810	1.17845	0.356144	-0.184425	-1.34618	-1.68966	-0.952694
VIT_01s0011g00130	1.75702	0.457682	0.282934	-1.08927	-1.58496	-1.06895
VIT_15s0046g02380	0.882317	0.302563	-0.0340618	-1.152	-1	-0.67423
VIT_04s0079g00290	1.11326	0.137504	0.234706	-1.44746	-0.962032	-0.528379
VIT_08s0058g01460	0.675063	-0.480626	0.464668	-0.836501	-1.37084	-0.395929
VIT_14s0081g00110	0.0795203	-0.125531	0.290818	-0.584963	-1.07907	-0.240134
VIT_09s0002g02840	0.78799	0.0191088	0.512648	-0.952694	-2	-0.104697
VIT_12s0057g01390	0.992768	-1.12029	0	-1.47393	-1.4344	-0.528379
VIT_15s0024g01760	1.69004	-1	0.869213	-1	-1	-0.40227
VIT_19s0014g05080	0.31034	-0.467267	0.193246	-1.72102	-2.20645	-1.81943
VIT_08s0040g00830	1.38221	-0.666576	0.259021	-0.952694	-2.55639	-2.25154
VIT_08s0007g02940	1.20997	-1.54232	-0.395929	-0.115077	-2.55639	-0.599462
VIT_17s0000g06920	2.1375	-0.971431	-0.845114	0.0658021	-1.26303	-1.21759
VIT_11s0016g05710	0.184809	1.02385	-0.570607	-0.827939	-2.05889	-1.06895
VIT_06s0061g00640	0.356144	0.997594	-0.528379	-0.473931	-1.76939	-0.785875
VIT_04s0008g03630	0.271027	0.333424	-0.563483	-0.915936	-2.32193	-0.494109
VIT_17s0000g08710	0.63846	1.49057	-0.713119	-0.915936	-2	-0.195396
VIT_03s0038g03540	0.0143553	1.05889	-0.728973	-1.52838	-2.73697	-0.40227
VIT_16s0098g00390	0.659925	1.31808	-0.21201	-1.26303	-2.73697	-0.810966
VIT_16s0050g01780	0.167786	1.6151	-1.29808	-0.745003	-1.51457	-1.334
VIT_03s0180g00250	0.218265	1.5737	-1.47393	-0.628906	-1.65896	-0.753085
VIT_15s0048g00580	-0.228819	2.04963	-1.152	-0.195396	-1.54232	-1.152
VIT_18s0001g11730	0.568843	1.20789	-1.29808	-0.0291463	-2.27462	-1.18442
VIT_08s0056g01080	0.632268	1.55908	-0.467267	-0.934198	-2.61411	-2.12029
VIT_18s0001g08690	0.943609	1.58496	0.341037	-1.09954	-2.64386	-1.76939
VIT_13s0019g02010	0.400538	1.4974	0.526069	-1.64386	-2.25154	-2.12029
VIT_16s0098g00400	0.555816	1.8413	-0.286304	-0.327952	-2.80255	-1.14136
VIT_15s0107g00270	0.519374	2.11659	0.189034	-0.358454	-2.47393	-1.88897
VIT_12s0034g00970	0.77961	1.852	-0.251539	-1.52838	-2.12029	-1.334
VIT_19s0015g00610	0.159199	1.87971	-0.263034	-1.2863	-2.03899	-1.03899
VIT_12s0034g00980	0.78799	1.63691	-0.0439433	-1.13079	-1.61411	-0.980891
VIT_03s0063g01120	0.39689	2.29278	-0.577767	-1.20645	-2.18442	-1.67423
VIT_07s0005g02040	0.973305	2.27898	-0.621488	-0.570607	-1.90689	-1.334
VIT_14s0108g00710	0.804604	2.02739	0.371094	-1.94342	-2.37084	-0.880091
VIT_12s0034g02440	0.653824	0.333424	-1.06895	-0.666576	-1.98089	-2.03899
VIT_19s0015g01580	0.457682	0.719549	-0.853779	-0.535332	-2.37084	-1.72102
VIT_10s0003g04940	0.454176	0.731183	-0.14667	-0.109878	-2.37084	-2.12029
VIT_06s0004g04990	0.681074	0.63846	-0.556393	-0.115077	-2.12029	-2.01937
VIT_07s0005g04510	0.234706	0.197446	-0.888969	-0.234465	-2.27462	-2.64386
VIT_07s0005g03430	0.137504	1.28491	-1.13079	-0.636362	-2.01937	-2.34618
VIT_13s0067g01640	0.578536	1.40418	-1.14136	-0.810966	-1.94342	-2.25154
VIT_07s0005g00780	0.604071	1.21826	-0.761213	-0.810966	-1.62891	-2.27462
VIT_13s0067g02280	0.995183	1.3084	-1	-1.24013	-2.32193	-2.90689
VIT_01s0011g02000	0.807355	2.34388	-0.906891	-0.286304	-2.90689	-2.18442
VIT_13s0019g02050	1.12212	2.74344	-1.12029	-0.104697	-2.16273	-1.92504
VIT_08s0007g06500	0.762703	2.75489	-2.14136	-0.460634	-2.18442	-1.57061
VIT_01s0010g00920	1.17845	2.21723	-1.68966	-1.16273	-1.72102	-2.42146
VIT_07s0129g00200	1.61196	0.619804	-0.50772	-0.494109	-1.81943	-2
VIT_14s0066g01590	1.68257	0.826464	-0.136062	-0.152003	-2.52838	-2.07907
VIT_07s0104g00490	1.68557	1.7034	-0.628906	-0.217591	-1.98089	-2.01937
VIT_04s0008g05740	1.40781	1.18269	-0.136062	-0.0639118	-1.87127	-1.94342
VIT_03s0038g02290	1.72683	0.793549	-0.427919	-0.915936	-1.13079	-1.90689
VIT_12s0028g02560	1.56071	1.47854	-0.535332	-1.00965	-1	-1.87127
VIT_13s0064g00410	1.32385	1.15056	-0.309955	-0.535332	-2.09954	-1.29808
VIT_14s0030g00260	1.0681	1.49228	0.0749621	-0.245825	-2.14136	-1.04891
VIT_01s0010g00330	1.42582	1.42939	-0.0892673	-0.636362	-1.64386	-1.03899
VIT_05s0020g02670	1.33533	1.09311	-0.162729	-0.340075	-1.67423	-0.705257
VIT_04s0069g00750	1.16779	0.713696	-0.467267	-0.643856	-1.75309	-0.697437
VIT_09s0002g06290	1.95853	1.33914	-0.0943924	-0.643856	-2.34618	-0.888969
VIT_04s0044g01020	2.22136	0.931053	-0.053893	-0.120294	-1.94342	-1
VIT_07s0031g00750	2.07838	1.09085	-1.07907	-0.871267	-2.09954	-1.09954
VIT_08s0058g00280	2.2859	0.847997	-0.447459	-1.32193	-2.03899	-1.10988
VIT_11s0065g00720	2.77259	0.690045	0	-0.906891	-2.01937	-2.01937
VIT_14s0066g02270	2.64616	0.87709	-0.473931	-0.415037	-1.09954	-1.54232
VIT_06s0004g02880	2.25096	1.95109	-0.389615	-1.14136	-1.55639	-2.18442
VIT_08s0007g03780	2.37016	2.20372	0.0565835	-1.62891	-1.90689	-1.78588
VIT_02s0025g02640	2.3505	2.42761	0	-0.862496	-2.01937	-2.58496
VIT_08s0007g01900	2.36923	1.22856	-0.206451	-0.340075	-1.8365	-2.64386
VIT_14s0108g00560	1.96471	1.92347	0.246915	-0.157356	-1.78588	-2.73697
VIT_17s0000g08870	2.58496	1.63227	0.254997	-0.109878	-1.54232	-1.87127
VIT_14s0030g01170	2.39689	1.9855	-0.304006	0.201634	-1.42146	-1.61411
VIT_11s0016g01160	2.10992	2.63846	-0.934198	-0.274622	-2.37084	-2.61411
VIT_11s0016g01450	2.07496	2.3627	-0.52146	0.457682	-1.73697	-2.58496
VIT_16s0013g00990	0.941106	0.776806	0.389567	-0.0489096	-2.52838	-3.09954
VIT_07s0129g00570	0.765535	1.33724	0.707819	-0.0193653	-3.18442	-2.61411
VIT_02s0025g03140	0.411426	1.73408	0.790772	0.751321	-2.52838	-2.25154
VIT_18s0041g01700	0.246915	0.8101	0.41864	0.341037	-1.39593	-3.27462
VIT_11s0016g03050	0.578536	0.63846	0.20581	-0.713119	-2.44746	-1.06895
VIT_12s0035g00990	1.17419	0.751321	0.197446	-0.104697	-2.61411	-0.934198
VIT_11s0037g00960	0.329602	0.858644	0.509274	0.115477	-2	-1.20645
VIT_16s0050g01860	0.133125	1.22445	0.647698	0.367371	-2.29808	-1.26303
VIT_11s0016g03030	0.672048	0.87709	0.238787	-0.0841604	-1.78588	-0.836501
VIT_06s0004g06210	0.176323	0.41864	1.28096	0.829173	-1.98089	-0.480626
VIT_17s0000g00950	0.910733	0.918386	1.1177	0.776806	-2.5009	-0.681924
VIT_15s0048g02490	0.39689	0.15056	0.0519521	1.24489	-1.1954	-1.90689
VIT_18s0001g01320	0.318076	0.290818	0.59136	0.765535	-0.906891	-1.12029
VIT_08s0007g00920	0.669027	0.31034	0.690045	1.32769	-1.35845	-0.990414
VIT_15s0046g03190	0.254997	0.594549	1.5656	0.119909	-1	-1.70526
VIT_11s0016g00500	0.41864	0.41864	-0.769387	1.04264	1.86658	-0.777608
VIT_10s0042g00840	0.751321	-0.053893	-0.810966	1.3599	2.14839	-0.152003
VIT_07s0141g00890	0.647698	0.359896	-2.05889	0.278976	1.67205	-0.389615
VIT_18s0072g01090	1.04498	1.24489	-1.76939	0.214125	0.823749	-0.0489096
VIT_10s0116g01840	1.81147	1.5042	-1.35845	0.344828	2.04264	-0.777608
VIT_08s0007g03540	2.0681	-0.68966	-0.810966	1.08633	0.62293	0.49228
VIT_03s0038g00340	1.46118	1.25096	-1.34618	1.5737	1.5737	0.282934
VIT_06s0004g05170	2.04614	0.751321	-0.584963	1.12653	0.771181	0.765535
VIT_17s0000g09290	2.45943	1.77961	-0.427919	1.22239	0.975752	0.0379678
VIT_12s0055g00590	-1.87127	1.51096	-1.38333	1.03328	0.829173	-1.96203
VIT_14s0030g00180	-1	1.14622	-1	1.23471	0.757023	-1
VIT_02s0025g04270	-1	1.89401	-1	1.59455	0.0885939	-1
VIT_10s0092g00370	-1	1.5008	-1	1.7852	0.555816	-1
VIT_09s0096g00930	-1	1.53605	-1	1.91839	1.89142	-1
VIT_01s0137g00080	-1.08927	1.83996	-1.04891	0.9855	1.44361	-0.862496
VIT_18s0166g00260	-0.915936	1.36551	-0.761213	0.884923	2.11214	-1.21759
VIT_11s0016g05180	-1	1.68107	-0.162729	0.8101	1.67205	-1.08927
VIT_07s0005g06240	-0.0193653	0.85333	-1.06895	0.0885939	-0.195396	-1.48735
VIT_01s0010g00870	0.275007	1.24691	-1.10988	0.690045	-0.200913	-1.32193
VIT_03s0038g02610	0.512648	1.2162	-0.980891	0.776806	0.0143553	-2.18442
VIT_07s0005g06200	0.468149	1.33724	-0.897902	0.34861	0.141869	-1.78588
VIT_14s0030g01700	0.782409	0.647698	-1.03899	-0.141356	0.254997	-1.48735
VIT_13s0084g00360	0.234706	0.980635	-0.280451	0.923466	-0.109878	-1.55639
VIT_13s0084g00420	0.454176	1.36177	-0.0740006	0.923466	-0.415037	-1.62891
VIT_09s0018g01980	-0.157356	1.5656	-0.570607	0.529405	-0.599462	-2.61411
VIT_19s0014g00530	-0.0489096	1.38589	-1.334	1.05427	0.0473057	-2.42146
VIT_11s0016g03590	0.111031	1.45768	-1.90689	-0.234465	0.641546	-1.17354
VIT_12s0035g00080	-0.00965017	1.75987	-1.42146	0	-0.184425	-1.13079
VIT_03s0063g01050	0.0658021	0.736966	-2.01937	0.871844	0.471621	-1.75309
VIT_13s0158g00420	0.488858	0.644625	-1.34618	0.559084	0.59773	-0.621488
VIT_07s0005g06180	0.588165	0.948601	-1.73697	1.22651	0.823749	-1.02915
VIT_08s0056g00900	0.695994	1.18057	-0.79419	0.647698	1.07268	-1.92504
VIT_18s0041g00700	1.18057	1.71223	-0.280451	0.552541	0.771181	-2.03899
VIT_14s0128g00160	0.246915	2.0072	-1.22882	0.99035	1.94236	-0.971431
VIT_09s0070g00220	0.629162	1.46815	-0.897902	1.27501	1.19325	-1.22882
VIT_05s0062g00740	1.03562	1.8784	-0.836501	0.936088	1.43296	-1.48735
VIT_19s0014g04530	-0.681924	0.193246	-0.37707	0.684071	-0.358454	-0.514573
VIT_10s0003g05800	-0.777608	0.124328	-0.460634	0.716625	0.0612002	-0.636362
VIT_12s0035g00250	-0.0639118	0.610385	-0.440916	0.552541	0.0565835	-1.20645
VIT_05s0049g01270	-0.21201	0.656878	-0.467267	0.411426	0.141869	-0.636362
VIT_16s0022g02140	-0.68966	1.17419	-0.383329	0.662965	-0.0790716	-1.10988
VIT_14s0171g00140	-0.556393	0.106572	-0.0193653	1.03797	0.0426443	-1.55639
VIT_09s0002g03270	0.0565835	0.757023	-0.434403	1.53771	0.509274	-1.48735
VIT_14s0066g01840	0.0143553	0.440066	0.128733	1.48027	0.918386	-1.26303
VIT_03s0063g00530	-0.274622	0.363638	-0.263034	0.890122	0.834576	-1.37084
VIT_05s0102g00970	-0.52146	0.81284	-0.370838	0.831877	0.793549	-0.943416
VIT_05s0020g02500	-0.251539	0.635367	-0.577767	0.920928	0.751321	-0.871267
VIT_09s0002g08640	-0.713119	0.549258	-0.50772	1.18903	0.429393	-0.494109
VIT_19s0014g05180	0.00958605	0.536053	-0.274622	1.25902	0.367371	-0.666576
VIT_09s0002g02360	0.0931094	1.64923	-0.577767	0.751321	0.532733	-0.614109
VIT_04s0023g00220	-0.245825	1.04963	-0.827939	0.678072	0.302563	-0.053893
VIT_13s0047g00720	-0.447459	1.05658	-0.395929	0.776806	0.302563	-0.109878
VIT_18s0001g05600	-0.309955	0.87709	-0.115077	-0.0943924	0.359896	-0.487352
VIT_04s0044g00250	-0.257275	1.04264	-0.440916	-0.109878	1.01436	-0.274622
VIT_05s0020g04260	0.0143553	0.454176	0.146221	0.588165	0.928528	-0.0790716
VIT_05s0020g01560	0.0426443	0.641546	-0.280451	0.0840643	1.0072	0.271027
VIT_07s0129g00920	0.0285692	0.710761	-0.427919	0.485427	1.19114	-0.104697
VIT_17s0000g04270	0.464668	1.75132	-0.570607	0.356144	1.57531	-0.556393
VIT_13s0156g00580	0.468149	1.63537	-0.542318	1.08406	1.59136	0.218265
VIT_07s0129g00890	-0.0389941	1.50589	-0.606767	0.801848	1.57046	-0.120294
VIT_09s0002g04290	-0.0689474	1.71516	-0.257275	1	1.21412	-0.234465
VIT_15s0046g01460	-0.141356	0.858644	0.672048	2.45066	0.771181	-0.915936
VIT_05s0102g00620	0.294743	1.67506	0.975752	2.43118	0.584963	-0.962032
VIT_15s0048g00780	-0.228819	0.644625	1.08633	1.43296	0.0658021	-1.55639
VIT_01s0026g01440	-0.217591	0.0285692	0.572081	1.76977	-0.136062	-0.500898
VIT_16s0013g01080	-0.447459	0.584963	0.568843	1.5025	-0.0639118	-1
VIT_06s0004g01740	-0.643856	0.773996	0.63846	1.18057	0.341037	-0.577767
VIT_12s0028g03560	0.39689	0.475085	0.63846	0.920928	0.32577	-0.971431
VIT_03s0063g01510	0.78799	0.468149	0.290818	1.75702	0.734077	-0.705257
VIT_04s0008g04510	0.230613	0.78799	0.997594	1.67506	0.669027	-0.415037
VIT_10s0116g01820	0.616671	1.37666	1.66751	1.47508	0.672048	-0.340075
VIT_03s0132g00100	0.32577	-0.934198	0.172061	-0.274622	-0.761213	0.495695
VIT_14s0030g02260	0.495695	-1.05889	-0.340075	0.0795203	-0.0588937	0.141869
VIT_06s0004g00690	0.594549	-0.713119	1.04264	0.509274	-0.447459	-0.606767
VIT_14s0068g00840	0.111031	0.656878	1.36177	1.05658	-0.389615	1.26303
VIT_13s0147g00120	0.0238467	-0.217591	1.24489	0.948601	0.0285692	0.793549
VIT_01s0011g03800	-0.00481702	0.31034	1.58656	0.222392	0.0473057	1.09536
VIT_06s0004g06650	-0.234465	-0.0489096	0.782409	-0.0389941	-0.257275	0.374808
VIT_11s0016g04660	0.146221	-0.346176	0.672048	-0.415037	-0.115077	0.923466
VIT_07s0005g05520	0.367371	0.259021	0.549258	-0.614109	0.201634	1.38773
VIT_16s0098g00240	0.823749	-0.358454	0.997594	0.31034	0.900464	0.734077
VIT_06s0004g07340	1.02148	-0.628906	1.0635	-0.0340618	-0.173536	0.837271
VIT_05s0136g00340	1.27302	-0.0639118	1.2162	0.00480099	0.32577	0.845323
VIT_14s0030g00570	-0.421464	0.488858	0.382206	-0.298081	-0.925038	-0.0892673
VIT_18s0089g01330	-0.542318	1.16779	0.59136	-0.245825	-1.10988	0.669027
VIT_02s0025g01790	-0.14667	0.00958605	0.943609	-0.427919	-1.30996	0.526069
VIT_15s0048g02970	0.197446	0.197446	1.2162	-0.309955	-1.06895	0.356144
VIT_14s0030g00540	0.461179	0.734077	0.9855	-0.592194	-1.09954	0.968398
VIT_04s0043g00840	0.948601	2.07496	1.40236	0.119909	-0.37707	0.0285692
VIT_12s0034g01020	1.24691	1.22651	0.920928	0.176323	-0.643856	0.450661
VIT_06s0004g03870	1.67356	1.74272	1.13313	-0.421464	-0.447459	0.447138
VIT_18s0001g12580	0.8101	0.785202	1.61196	0.214125	-1.37084	0.246915
VIT_07s0005g01750	0.457682	1.57208	1.42044	0.404177	-1.17354	-0.245825
VIT_04s0008g03960	0.695994	0.987927	1.82239	0.440066	-0.37707	0.713696
VIT_01s0010g01850	0.62293	0.978196	0.884923	1.0681	-0.570607	0.457682
VIT_01s0010g01830	0.85333	0.736966	0.997594	0.757023	-0.628906	0.314213
VIT_08s0056g01160	0.903038	0.63846	1.14187	0.710761	-0.321928	0.209973
VIT_17s0000g03670	1.42044	1.5025	-0.240134	0.0749621	-0.761213	1.03797
VIT_14s0006g01830	1.09085	1.08406	0.106572	-0.120294	0.167786	1.1021
VIT_02s0012g02000	1.34104	1.28293	0.516015	0.0285692	0.222392	1.23061
VIT_06s0004g08420	0.669027	0.684071	0.773996	-0.480626	0.39689	0.532733
VIT_08s0007g05900	0.499102	0.801848	0.429393	-0.427919	0.128733	0.897886
VIT_01s0113g00430	0.725378	1.24489	0.468149	-0.217591	0.344828	0.845323
VIT_12s0028g00130	1.42582	0.49228	1.1088	-0.263034	-0.0892673	-0.274622
VIT_07s0005g02970	0.665999	-0.053893	-0.0389941	-0.304006	-0.658963	-0.40227
VIT_12s0034g01470	0.78799	0.259021	-0.0943924	-0.292181	-0.697437	-0.309955
VIT_13s0106g00020	0.801848	0.389567	-0.666576	0.0379678	-0.606767	-0.480626
VIT_06s0004g04620	1.01197	0.678072	-0.370838	-0.454032	-0.810966	-0.40864
VIT_19s0015g01910	0.436517	0.230613	-0.21201	-0.389615	-0.897902	0.306457
VIT_09s0002g02980	0.956057	1.2967	-0.370838	0.47854	-0.370838	0.106572
VIT_04s0008g06710	0.931053	0.450661	0.00480099	0.422233	-0.535332	0.0379678
VIT_13s0139g00270	1.38957	0.874469	-0.109878	0.653824	-0.614109	0.234706
VIT_19s0014g00710	1.32	0.454176	-0.120294	-0.628906	-0.467267	0
VIT_07s0031g02060	1.5177	0.49228	0.31034	-0.321928	-0.528379	-0.494109
VIT_04s0008g03300	1.46467	0.978196	-0.570607	-0.528379	-0.40864	0.238787
VIT_04s0044g00910	1.19535	1.09761	-0.223194	0.0238467	0.111031	-0.0340618
VIT_03s0038g01610	1.64	0.653824	-0.115077	0.0191088	-0.141356	0.20581
VIT_04s0079g00280	1.16779	0.59773	0.63846	0.49228	-1.12029	1.44184
VIT_17s0000g07420	1.31615	0.559084	0.545968	0.461179	-0.245825	0.900464
VIT_06s0004g01480	1.80323	0.861294	0.5025	-0.980891	-0.666576	0.552541
VIT_12s0034g01480	1.36551	0.341037	0.367371	-0.785875	-0.962032	0.736966
VIT_03s0110g00120	1.39689	0.0332762	0.581753	-0.352302	-0.592194	0.707819
VIT_04s0008g05970	0.734077	-0.0439433	0.495695	0.00958605	-1.26303	-0.0740006
VIT_17s0000g00730	0.83996	0.443607	0.337235	0.298658	-0.971431	0.115477
VIT_12s0034g01270	0.866578	0.818305	0.263034	0.141869	-1.16273	0.404177
VIT_13s0064g00980	0.782409	1.1088	0.536053	-0.434403	-1.00965	0.159199
VIT_12s0028g01230	0.509274	0.454176	0.8101	-0.542318	-0.614109	0.246915
VIT_09s0054g01110	0.823749	0.425817	0.754175	-0.0841604	-0.556393	0.389567
VIT_01s0011g04940	0.871844	0.63846	0.282934	-0.0841604	-0.599462	0.63846
VIT_07s0031g03100	1.09311	0.687061	0.681074	-0.240134	-0.327952	0.734077
VIT_08s0007g03800	0.653824	1.26303	-0.286304	0.31034	-1.12029	-0.292181
VIT_04s0044g00770	0.678072	1.69004	0.246915	-0.315929	-1.00965	-0.666576
VIT_01s0137g00730	0.842644	1.95233	-0.251539	-0.268817	-1.12029	-0.298081
VIT_05s0077g01420	1.09536	0.887525	-0.819428	-0.280451	-1.35845	-0.0588937
VIT_14s0060g01960	1.77681	1.43474	-0.697437	-0.389615	-1.30996	0.425817
VIT_01s0137g00050	1.29474	1.5294	-0.217591	-0.0489096	-1.38333	-0.315929
VIT_03s0180g00110	1.57046	1.58656	-0.173536	-0.104697	-1.14136	0.0143553
VIT_18s0001g08410	1.82103	1.66297	0.512648	0.102098	-2.01937	-0.21201
VIT_13s0073g00150	1.60723	1.6198	0.371094	0.184809	-1.92504	0.461179
VIT_08s0040g01240	1.73697	1.05889	0.565597	0.488858	-1.5009	-0.0841604
VIT_08s0040g03050	1.8413	0.98307	0.0703893	0.0238467	-1.14136	-0.298081
VIT_14s0036g00330	1.64616	1.18269	0.218265	0.321928	-1.334	-0.494109
VIT_17s0000g00040	1.25298	1.58336	0.337235	0.545968	-1.02915	0.0426443
VIT_19s0015g01620	1.03092	1.28096	0.193246	0.457682	-1.08927	-0.705257
VIT_14s0066g02410	1.27898	1.17632	0.701919	0.529405	-0.925038	-0.40227
VIT_01s0011g00660	0.81284	1.34861	-0.990414	-0.346176	-0.487352	-1.27462
VIT_18s0001g15700	1.46815	1.63072	-0.925038	-0.263034	-0.621488	-1.38333
VIT_12s0035g01710	0.757023	1.51937	-1.1954	0.363638	-0.705257	-1.18442
VIT_07s0005g06300	1.09761	1.80735	-1.14136	-0.0489096	-0.514573	-0.721024
VIT_14s0060g02430	1.28885	1.14187	-0.990414	-0.785875	-0.584963	-0.761213
VIT_14s0068g02290	0.887525	1.34104	-0.934198	-0.480626	-0.577767	-0.570607
VIT_04s0008g03480	1.25701	1.13532	-0.346176	-0.1899	-0.853779	-0.681924
VIT_03s0017g00560	1.17419	1.19745	-0.358454	-0.280451	-0.304006	-0.549339
VIT_17s0000g00250	1.58656	1.10434	-1.32193	-1.13079	-0.168123	-1.02915
VIT_12s0028g02200	1.848	1.44714	-0.897902	-0.880091	-0.00481702	-0.906891
VIT_11s0016g04800	1.41143	1.90689	-1.52838	0.59136	-0.251539	-0.528379
VIT_02s0025g01350	1.69896	1.71076	-1.21759	-0.104697	-0.0439433	-0.168123
VIT_18s0001g11200	0.975752	0.751321	-0.251539	-1.18442	0	-1.29808
VIT_08s0007g00240	0.845323	1.18481	-0.184425	-0.473931	0.536053	-0.556393
VIT_17s0000g06820	1.18692	1.13093	-0.0790716	-1.152	-0.681924	-0.621488
VIT_08s0040g02600	0.987927	1.24082	0.275007	-0.934198	-0.888969	-0.494109
VIT_06s0004g07220	1.17419	1.32385	0.600904	-0.636362	-0.0943924	-0.871267
VIT_03s0038g04550	0.707819	1.22651	0.278976	-0.40864	-0.206451	-0.487352
VIT_02s0025g03940	1.21826	1.45242	0.111031	-0.370838	-0.68966	-0.68966
VIT_03s0063g02620	1.14839	1.48886	0.271027	-0.440916	-0.549339	-0.467267
VIT_14s0066g02140	0.499102	1.05427	0.447138	-0.0995357	-0.810966	-0.643856
VIT_11s0016g05810	0.141869	1.02621	0.250962	0.956057	-0.500898	-0.298081
VIT_13s0064g00130	0.106572	0.920928	0.172061	0.443607	-0.473931	-0.827939
VIT_07s0130g00380	0.176323	0.861294	0.0795203	0.616671	-0.440916	-0.658963
VIT_11s0016g04600	0.565597	1.00959	0.294743	0.475085	-0.68966	-0.584963
VIT_04s0008g00920	0.575312	1.28885	-0.304006	0.128733	-0.52146	-1.14136
VIT_07s0005g03740	0.584963	1.22651	-0.195396	0.184809	-0.681924	-0.853779
VIT_14s0066g01560	0.785202	1.05658	-0.0242475	0.167786	-0.184425	-0.943416
VIT_16s0022g02380	0.736966	1.3296	-0.120294	0.00480099	0.146221	-1.22882
VIT_02s0241g00040	1.02621	1.33342	-0.897902	0.481988	-0.263034	-0.599462
VIT_03s0063g02040	0.555816	1.51433	-0.681924	0.306457	-0.234465	-0.971431
VIT_17s0000g07290	0.359896	1.25701	-0.819428	0.49228	-0.14667	-0.50772
VIT_10s0092g00090	0.254997	0.8101	-0.447459	0.0976108	0.389567	-0.584963
VIT_05s0020g00480	0.552541	0.716625	-0.168123	0.404177	0.610385	-0.785875
VIT_11s0016g03750	0.432959	1.43829	-0.340075	0.0795203	0.0749621	-0.251539
VIT_08s0007g08350	0.0703893	0.963474	-0.292181	0.499102	0.128733	-0.358454
VIT_12s0034g01840	0.314213	1.19114	-0.0995357	0.41864	0.0612002	-0.65139
VIT_05s0077g01740	1.02148	1.38221	0.344828	1.11103	-0.340075	-0.697437
VIT_16s0050g00810	0.897886	1.31808	0.529405	0.128733	-0.141356	-0.298081
VIT_04s0044g00860	0.659925	1.27699	0.672048	0.282934	-0.00481702	-0.240134
VIT_05s0029g01420	1.18692	1.71223	0.250962	0.197446	-0.0389941	-0.745003
VIT_17s0000g01800	1.41864	1.18903	0.34861	0.464668	-0.206451	-0.514573
VIT_13s0019g01410	1.24286	1.61353	0.690045	0.184809	-0.280451	-0.0588937
VIT_01s0010g02870	1.5656	1.66903	0.447138	0.389567	-0.234465	-0.340075
VIT_13s0084g00690	0.250962	2.40145	0.739848	1.33914	-0.0588937	-0.880091
VIT_15s0048g00790	0.522725	2.34577	0.675063	0.936088	0.713696	-0.658963
VIT_19s0015g00260	1.16135	2.13641	0.801848	0.754175	0.776806	-0.549339
VIT_12s0059g00540	1.87053	1.17632	-0.346176	1.18269	0.905608	-0.769387
VIT_09s0018g01900	1.64463	1.15056	-0.228819	0.722466	-0.0841604	-0.79419
VIT_19s0015g00660	1.42761	1.16564	-0.50772	0.619804	0.294743	-0.79419
VIT_02s0025g03070	1.41143	1.23879	-0.228819	0.290818	0.0931094	-0.67423
VIT_01s0026g01110	1.42044	1.37851	-0.257275	0.522725	0.141869	-0.971431
VIT_18s0075g00520	1.28491	1.61667	-0.240134	1.1592	0.908172	-1.30996
VIT_05s0020g01640	0.928528	1.99759	-0.109878	0.754175	0.450661	-1.18442
VIT_17s0000g05750	1.03092	1.75987	-0.434403	0.956057	0.619804	-0.592194
VIT_03s0017g01920	0.871844	0.739848	0.49228	0.882317	0.526069	-0.460634
VIT_14s0083g00550	1.21826	0.963474	0.0285692	1.07268	0.559084	-0.681924
VIT_01s0026g01120	0.890122	1.55254	0.128733	1.19535	0.572081	-0.810966
VIT_09s0002g05040	0.713696	1.42223	-0.0588937	1.55582	0.83996	-0.535332
VIT_18s0001g09110	1.0072	1.57046	0.536053	0.815575	1.08859	-0.592194
VIT_07s0031g00880	1.12212	1.30451	0.314213	1.0024	1.05427	-0.228819
VIT_14s0068g02120	0.818305	1.81831	-0.315929	0.352382	1.79494	0.635367
VIT_12s0034g00040	0.78799	1.82782	-0.240134	-0.136062	0.95109	0.159199
VIT_18s0001g04930	1.34483	1.56234	-0.109878	-0.370838	1.08633	0.512648
VIT_16s0050g02260	0.536053	1.85864	-0.528379	0.341037	0.389567	0.785202
VIT_01s0010g01570	1.09761	1.81967	-0.358454	0.278976	0.866578	0.710761
VIT_10s0003g03670	0.102098	1.8101	-0.383329	-0.251539	0.461179	-0.309955
VIT_18s0072g00830	0.454176	1.98063	-0.862496	-0.240134	0.0238467	-0.053893
VIT_11s0016g00390	0.672048	2.23471	-0.467267	0.0426443	0.133125	0.0473057
VIT_01s0011g03930	0.565597	1.78938	-0.836501	0.81284	-0.0943924	0.146221
VIT_09s0018g00290	0.59773	2.2967	-0.109878	0.49228	-0.0639118	0.193246
VIT_16s0050g01900	0.290818	1.73118	0.102098	0.678072	0.242857	-0.251539
VIT_02s0033g01210	0.254997	1.58015	0.146221	0.801848	0.63846	0.172061
VIT_14s0128g00030	0.771181	1.8101	0.0191088	0.62605	0.572081	-0.141356
VIT_07s0104g01550	1.0072	1.7852	-0.141356	0.858644	0.635367	0.20581
VIT_08s0007g01840	1.03328	1.90561	-0.0841604	0.847997	0.552541	0.32577
VIT_11s0016g02770	1.55908	2.17526	0.516015	-0.736966	0.41864	0.180572
VIT_12s0034g01120	1.58496	1.77961	0.0703893	-0.240134	0.765535	-0.251539
VIT_01s0244g00110	1.30451	1.86921	0.713696	0.0840643	0.581753	-0.473931
VIT_11s0037g01400	2.30451	1.07952	0.250962	0.0426443	0.407806	0.641546
VIT_12s0028g02420	1.82917	1.28491	0.62605	0.0703893	-0.0489096	0.436517
VIT_08s0058g00500	2.09085	1.76977	0.499102	-0.315929	0.242857	0.222392
VIT_01s0150g00440	2.23777	1.57531	-0.643856	0.163499	0.400538	-0.0892673
VIT_10s0003g01200	1.8046	1.41864	-0.00481702	0.119909	0.32577	-0.0943924
VIT_01s0127g00140	1.82375	1.1375	-0.109878	0.407806	0.542671	0.0749621
VIT_18s0117g00390	1.79355	1.52105	0.0473057	0.539366	0.578536	0.111031
VIT_07s0129g00460	1.74846	1.926	-0.334001	0.519374	0.997594	0
VIT_01s0146g00460	1.69004	1.8101	0.32577	0.807355	0.961006	0.0976108
VIT_17s0000g09670	1.56234	1.9855	-0.0489096	0.539366	0.454176	0.321928
VIT_04s0008g06980	1.48027	1.76129	0.124328	0.385891	0.762703	0.59136
VIT_05s0029g00650	1.87184	2.42403	0.0426443	0.635367	0.159199	0.31034
VIT_09s0002g09090	1.84933	2.34199	-0.0193653	0.610385	0.59773	0.604071
VIT_17s0000g05700	1.54926	1.60565	0.278976	1.12433	-0.592194	0.559084
VIT_02s0025g03720	1.852	1.60407	-0.327952	0.861294	-0.50772	0.429393
VIT_07s0185g00030	1.72101	1.28688	-0.0943924	0.790772	-0.0242475	0.367371
VIT_10s0003g00630	0.81284	1.54267	0.443607	0.318076	0.432959	0.505891
VIT_04s0044g01570	1.36551	1.57046	0.488858	0.167786	0.267036	0.47854
VIT_13s0019g04440	1.01197	1.72538	0.218265	-0.0588937	0.0332762	0.146221
VIT_06s0061g01610	1.15272	1.76553	0.230613	0.0426443	0.259021	0.359896
VIT_12s0028g00400	1.30256	2.1177	0.522725	0.329602	-0.340075	0.669027
VIT_04s0008g06590	1.09311	1.83592	0.226509	0.407806	-0.240134	0.238787
VIT_11s0118g00550	1.24691	1.72392	0.230613	0.759866	-0.454032	0.275007
VIT_07s0031g02910	1.57531	2.18587	0.41864	0.545968	0.0332762	0.407806
VIT_07s0104g01560	1.69153	1.94735	0.485427	0.47854	0.382206	0.464668
VIT_19s0027g00090	1.60249	1.84666	0.656878	0.259021	-0.104697	0.485427
VIT_12s0057g00950	1.9573	1.91966	0.407806	0.481988	-0.292181	0.385891
VIT_03s0038g00740	1.81147	1.82375	0.429393	0.584963	-0.00481702	0.378512
VIT_03s0063g00170	-1	3.23317	2.30256	1.82103	0.214125	0.329602
VIT_08s0058g00730	-0.614109	3.04498	0.804604	0.895303	0.785202	0.485427
VIT_04s0008g04460	-0.0144996	2.75631	1.41504	1.45242	0.871844	-0.240134
VIT_05s0077g00660	0.450661	3.28145	2.04963	1.48199	0.722466	0.532733
VIT_03s0110g00160	-1	3.42626	2.31711	0.209973	-1	-0.535332
VIT_05s0051g00530	-1	4.78171	1.41504	0.290818	-0.713119	-0.473931
VIT_13s0047g00340	-1.70526	4.13887	1.0048	1.19745	-1.09954	0.404177
VIT_05s0029g00130	-1.40864	3.58696	1.58496	0.49228	-0.389615	0.39689
VIT_07s0104g01630	0.184809	3.76907	2.50927	1.36364	-1.75309	0.0238467
VIT_08s0040g02500	0.823749	4.27103	1.59136	0.0749621	-1.62891	-0.130787
VIT_15s0021g01040	0.464668	4.05427	2.25096	0.278976	-2.07907	0.146221
VIT_15s0046g03550	-1.00965	0.32577	0.572081	0.159199	-1.54232	-0.761213
VIT_03s0038g02980	-1.62891	0.684071	0.910733	0.659925	-1.94342	-0.643856
VIT_04s0008g06620	-1.34618	0.847997	0.275007	0.644625	-0.871267	-0.327952
VIT_15s0048g02900	-2.37084	1.11326	0.736966	0.106572	-0.769387	-0.0995357
VIT_10s0003g00840	-2.01937	0.374808	2.24082	0.804604	-1	-0.421464
VIT_15s0048g00860	-1.85378	1.7034	1.43652	0.85333	-2	-1.00965
VIT_08s0040g00740	-0.785875	1.85466	1.32193	1.03797	-1.35845	-1
VIT_08s0040g00730	-0.862496	2.10545	0.882317	0.49228	-0.141356	-1.16273
VIT_12s0142g00710	-1.37084	1.81831	1.01911	-0.880091	-1.34618	-0.542318
VIT_13s0019g03430	-1.57061	2.9279	1.21826	-1.22882	-1.96203	-0.37707
VIT_18s0041g01100	-1	2.68332	0.0143553	0.32577	-1.5009	-0.280451
VIT_16s0100g00580	-1.05889	3.37063	0.725378	-0.1899	-1.87127	0.665999
VIT_13s0067g03170	-2.37084	1.77118	1.53771	1.09761	0.607232	1.32769
VIT_08s0007g05740	-1.94342	1.01436	0.970854	0.267036	0.201634	1.28885
VIT_18s0117g00210	-2.03899	1.97331	1.44184	0.167786	-0.234465	1.08406
VIT_07s0031g02280	-1.72102	2.33533	1.27103	-0.745003	0.230613	2.55336
VIT_10s0003g00480	-1.34618	2.79216	1.17632	1.03562	1.16779	2.45505
VIT_14s0006g00450	-0.104697	0.367371	1.95977	0.457682	-1.30996	0.647698
VIT_13s0019g01990	-1	0.526069	1.49057	0.616671	-1.01937	1.4991
VIT_03s0017g00620	-1.24013	1.04498	1.39872	1.10434	-1.00965	1.01197
VIT_02s0025g05110	-0.480626	1.32	1.28491	0.95109	-0.952694	0.757023
VIT_17s0000g06290	-0.0144996	1.99035	2.60565	1.44007	-1.55639	1.46641
VIT_05s0051g00680	-0.0489096	0.920928	2.02739	1.28096	-1	1.0072
VIT_14s0066g02590	-0.217591	0.83996	2.54432	1.7866	-1.21759	1.23879
VIT_04s0210g00110	-0.785875	0.555816	0.294743	0.275007	-0.528379	1.08859
VIT_18s0122g00240	-0.658963	0.34861	0.464668	0.900464	-0.228819	0.454176
VIT_07s0031g01930	-0.245825	1.10657	0.250962	-0.00481702	-0.053893	0.389567
VIT_18s0001g06080	-1	1.59614	0.425817	0.762703	0.0332762	0.0795203
VIT_09s0002g07090	-0.542318	1.55418	0.736966	0.5025	0.0473057	0.765535
VIT_19s0085g00050	-1	1.97085	1.9855	0.0612002	-0.473931	0.690045
VIT_11s0103g00310	0.172061	2.54761	1.17845	0.918386	-0.460634	0.632268
VIT_07s0005g01280	0.0519521	1.44537	1.59773	0.903038	0.529405	0.742725
VIT_02s0025g04960	0.106572	1.84933	0.8101	0.495695	0.0840643	0.15056
VIT_16s0100g00740	-0.240134	2.05658	1.36737	0.713696	0.422233	0.363638
VIT_14s0060g01790	4.31034	3.06235	-2.37084	-1.52838	-1	-1
VIT_05s0077g01670	4.69284	3.08916	-2.32193	-1.03899	-0.777608	0.0191088
VIT_07s0005g01290	4.5008	2.59136	-1.55639	-0.0242475	0.180572	-0.666576
VIT_16s0022g02170	5.20945	3.46684	-1.47393	0.687061	0.254997	-0.915936
VIT_04s0044g01100	3.848	3.65115	-1.13079	-2.16273	-2.37084	-1
VIT_17s0000g01120	3.23624	3.73769	-0.819428	-1.81943	-1	-1
VIT_16s0022g00890	4.37573	3.69525	-0.184425	-2.20645	-1	-0.906891
VIT_03s0091g00750	5.19061	4.16859	-0.761213	-1.29808	-1	-1.40864
VIT_07s0005g02380	5.574	4.83002	-1.08927	-1.42146	-1	-1
VIT_03s0038g04000	3.96193	4.45899	-1.59946	0.941106	-1.85378	-1.68966
VIT_19s0014g00410	2.47249	4.32457	-2.07907	-0.599462	-2.70526	-2.76939
VIT_04s0043g00560	3.63149	4.40145	-1.02915	-0.721024	-2.70526	-2.64386
VIT_07s0151g00340	3.2755	3.46292	-1.20645	-0.346176	-2.47393	-1.94342
VIT_19s0014g00460	2.81284	3.6807	-1.01937	0.371094	-2.5009	-2.32193
VIT_12s0035g01170	2.55663	3.44449	-1.52838	-0.592194	-1.73697	-1.8365
VIT_04s0023g03710	3.1177	2.60565	-1.34618	-1.05889	-1.75309	-2.09954
VIT_18s0041g00790	2.91648	2.65153	-1.24013	-0.745003	-1.64386	-1.46063
VIT_08s0058g00170	3.13038	3.01197	-0.721024	-0.845114	-2.09954	-1.48735
VIT_12s0057g01060	2.09424	3.37434	-0.880091	-0.447459	-0.785875	-2.58496
VIT_18s0166g00250	2.62916	2.41143	-1.06895	-0.200913	-0.65139	-2.20645
VIT_16s0039g00820	3.555	1.69004	-0.245825	0.382206	-2.22882	-2.5009
VIT_11s0052g00790	4.17473	2.52189	-0.494109	-0.217591	-3.14136	-1.87127
VIT_16s0039g00760	3.99398	2.69228	0.647698	1.31421	-3.64386	-2
VIT_02s0025g02880	3.70561	3.8015	0.393233	0.0565835	-3.37084	-0.52146
VIT_01s0010g03540	2.79008	4.11464	0.356144	-0.1899	-2.70526	-0.871267
VIT_14s0030g00430	2.53273	4.60743	0.572081	-0.395929	-2.70526	-0.990414
VIT_15s0048g00990	2.75631	2.6523	1.61039	-0.636362	-2	-1.78588
VIT_13s0106g00070	3.25298	2.83188	1.54432	-0.785875	-3.37084	-1.30996
VIT_08s0007g04150	2.8312	2.90881	0.874469	-0.421464	-2.90689	-1.02915
VIT_12s0059g02530	3.81899	2.95109	0.0191088	-1	-1.88897	-0.827939
VIT_13s0067g01930	3.33247	3.04789	0.201634	-0.223194	-2.67423	-0.592194
VIT_03s0063g00010	3.82646	3.51307	0.154886	-0.447459	-2.37084	-1.1954
VIT_10s0071g00870	4.00929	3.44361	-0.0841604	-1.37084	-2.44746	-2.12029
VIT_17s0000g06020	3.93609	3.5741	0.356144	-0.906891	-3.01937	-1.76939
VIT_03s0038g03210	4.61648	3.10154	0.516015	-1.09954	-2.98089	-1.57061
VIT_03s0063g00210	3.57894	2.83996	0.85333	-0.415037	-2.18442	-2.52838
VIT_18s0001g14130	3.14731	4.03269	0.719549	-0.120294	-2.87127	-1.94342
VIT_16s0050g01680	3.78101	3.77681	0.8101	-0.549339	-2.20645	-1.88897
VIT_18s0122g00550	2.37109	5.46216	0.159199	-0.309955	-2.73697	-1.8365
VIT_12s0028g03050	3.22805	5.28565	0.762703	0.826464	-2.70526	-1.94342
VIT_14s0171g00210	4.39025	4.0063	-0.67423	-0.827939	-3.42146	-3.52838
VIT_06s0004g01550	3.85699	4.14785	-0.50772	0.684071	-3.37084	-3.14136
VIT_06s0004g02690	4.13614	3.60526	0.106572	0.278976	-2.76939	-3.22882
VIT_07s0031g02950	3.78311	4.46576	1.02857	0.0565835	-1.96203	-2.67423
VIT_10s0116g01030	4.06924	4.46554	1.26903	1.13969	-1.30996	-2.90689
VIT_12s0057g01070	3.32529	5.28318	0.209973	0.404177	-1.76939	-3.76939
VIT_11s0052g01140	4.66827	4.80374	0.790772	0.286881	-2.47393	-3.52838
VIT_18s0001g08870	4.23522	5.08108	0.765535	0.532733	-1.98089	-3.8365
VIT_09s0002g01030	4.44361	3.16939	-0.40227	-0.184425	-1.90689	-2.14136
VIT_08s0056g01520	4.91441	3.81865	-0.415037	0.201634	-1.92504	-2.70526
VIT_08s0032g00890	4.74021	3.58856	-0.240134	0.837271	-1.57061	-2.14136
VIT_11s0016g03710	5.08123	4.01167	0.356144	-0.37707	-2.18442	-2.20645
VIT_01s0011g03860	5.19731	4.52795	0.137504	-0.157356	-1.90689	-2.32193
VIT_14s0108g01310	4.97606	4.40304	0.884923	-0.871267	-1.78588	-2.80255
VIT_06s0080g00150	5.03254	4.35073	0.404177	-0.514573	-1	-2.44746
VIT_19s0014g00100	1.62916	1.41864	-1.42146	0.333424	-0.952694	-2.44746
VIT_04s0023g00430	1.42403	1.98914	-1.76939	0.447138	-0.292181	-2.22882
VIT_02s0025g02510	1.95853	1.57854	-1.81943	-0.223194	-1.152	-1.61411
VIT_14s0066g02080	2.13422	1.91966	-0.447459	1.17419	-1.02915	-1.4344
VIT_10s0116g00520	1.97453	1.26103	-0.447459	0.568843	-0.487352	-3.64386
VIT_14s0068g00280	1.75987	1.83053	-0.298081	0.858644	-1.12029	-3.37084
VIT_08s0007g05030	2.53522	2.47162	0.0332762	0.314213	-1.24013	-4.32193
VIT_12s0055g00050	2.37016	2.7977	-0.14667	1.22651	-1.26303	-3.52838
VIT_07s0005g02530	0.647698	2.16027	-0.173536	-0.217591	0.411426	-1.48735
VIT_16s0013g02090	0.826464	2.97942	0.363638	-0.358454	-0.0689474	-0.728973
VIT_12s0059g01430	0.47854	2.94798	0.565597	0.49228	-0.785875	-2.01937
VIT_04s0044g01490	0.341037	2.53771	0.62293	0.948601	0.690045	-2.32193
VIT_14s0108g00590	0.471621	3.13696	-0.599462	0.172061	-0.0389941	-2.98089
VIT_11s0052g00120	0.748461	3.87414	-0.871267	1.85997	0.193246	-2.09954
VIT_09s0002g04010	1.04498	3.14513	-1.05889	1.3084	-0.0740006	-2.90689
VIT_18s0001g09870	1.33533	2.88622	-1.03899	1.04264	-0.556393	-2.12029
VIT_17s0053g00710	1.56722	3.14405	-0.697437	1.16993	-0.549339	-2.39593
VIT_07s0141g00330	2.16242	2.44007	-2.22882	0.259021	0.218265	-2.03899
VIT_06s0009g00980	1.99759	2.51433	-1.62891	0.897886	1.16779	-1.78588
VIT_12s0055g00020	2.17951	2.37481	0.0703893	0.294743	1.1088	-1.67423
VIT_17s0000g04460	2.70856	1.65992	-0.769387	0.450661	0.226509	-1.81943
VIT_03s0063g01240	2.82511	2.27699	-0.934198	0.49228	1.20372	-2.55639
VIT_10s0116g00800	3.32529	4.1511	-0.880091	1.5008	1.28885	-1.08927
VIT_10s0003g01980	3.08066	3.24235	-0.473931	1.19954	0.594549	-1.62891
VIT_14s0060g01090	3.38036	3.3147	-0.217591	1.29866	1.19954	-2.05889
VIT_12s0055g00870	-0.274622	2.51349	1.25701	-1.34618	-1	-1.98089
VIT_04s0008g01870	1.5008	2.75275	1.12212	-1.67423	-1	-1
VIT_17s0000g05690	3.45593	0.457682	-0.152003	0.647698	-0.535332	-2.29808
VIT_18s0001g01140	5.05673	0.701919	0.526069	0.468149	-0.315929	-1.47393
VIT_03s0038g01960	4.57773	-0.0995357	-0.50772	-0.628906	-1.85378	-0.514573
VIT_11s0052g01780	3.19902	1.52105	1.19114	-0.321928	-1.30996	-2.5009
VIT_02s0012g00650	4.10629	1.68407	2.1375	-1	-1	-1.1954
VIT_14s0030g01210	3.46031	0.356144	1.1177	-0.606767	-1.94342	-0.705257
VIT_09s0002g08060	3.33104	1.04731	-0.0943924	-0.636362	-1.68966	-0.364633
VIT_18s0001g03000	3.48371	0.887525	0.34861	-0.480626	-1	-0.785875
VIT_03s0038g02140	4.8408	1.22239	0.8101	0.0658021	-1.90689	-1.1954
VIT_14s0068g00260	3.68818	1.74989	0.815575	-0.836501	-2.20645	-1.44746
VIT_19s0015g00870	3.95264	2.1188	0.728283	0.0931094	-1.90689	-0.952694
VIT_14s0068g01580	2.26704	1.08406	-0.0740006	-1.94342	-1.51457	-1.87127
VIT_10s0003g05210	3.10322	1.33914	0.275007	-1.92504	-1	-1.46063
VIT_16s0039g01450	2.51181	2.44361	0.0612002	-1.76939	-2.05889	-0.827939
VIT_05s0094g00880	3.54019	1.94611	-1.39593	-1.81943	-1.70526	-1
VIT_18s0001g06300	2.67732	1.87709	-0.915936	-1.88897	-1	-1
VIT_12s0059g01740	2.72538	1.7034	-0.584963	-1.59946	-1	-1
VIT_16s0022g00370	3.20737	2.52273	-1	-0.980891	-1	-0.845114
VIT_06s0004g03770	2.49057	2.15164	-1.52838	-1.25154	-1	-0.245825
VIT_11s0206g00050	2.54019	2.32289	-1.09954	-1.05889	-0.556393	-0.528379
VIT_03s0110g00370	4.54102	2.56965	-0.334001	-1.85378	-1	-1
VIT_13s0147g00230	3.86229	2.32577	-0.141356	-1.34618	-0.628906	-0.454032
VIT_08s0058g01270	3.12322	2.77259	-1.37084	-1.81943	-0.309955	0.693022
VIT_14s0030g00330	1.59296	3.05311	-1.06895	-0.274622	0.0426443	0.222392
VIT_08s0007g02040	2.09761	1.18692	-0.487352	-0.827939	0.263034	0.259021
VIT_08s0007g03050	2.41954	1.95853	-1.73697	-0.570607	-0.0943924	0.111031
VIT_17s0000g03560	2.88947	1.93985	-1.29808	-0.67423	0.106572	-0.141356
VIT_11s0016g04270	2.58896	2.02857	-0.79419	-0.636362	0.294743	-0.263034
VIT_18s0089g00190	1.33914	3.1565	-1	-2.27462	-1	-1
VIT_04s0044g01520	1.41504	4.35919	-1	-1.78588	-1	-1
VIT_14s0006g02550	1.19745	3.41909	-1	-1	-1	-1
VIT_04s0008g00530	1.31808	3.63382	-0.697437	-1.10988	-0.769387	-0.549339
VIT_01s0010g02590	1.40962	1.69599	-1.51457	-1.46063	-1.03899	-1.29808
VIT_02s0087g00510	1.47162	1.71076	-1.47393	-0.962032	-0.906891	-1.46063
VIT_12s0059g01280	2.12873	1.99277	-1.16273	-0.906891	-0.915936	-1.47393
VIT_06s0004g02050	0.722466	2.01197	-1.2863	-1.18442	-1.39593	-1.08927
VIT_01s0137g00130	1.49057	2.06465	-1.17354	-1.09954	-1	-1
VIT_11s0016g04150	1.13969	2.24286	-1	-1	-1	-1
VIT_11s0016g00340	0.953576	2.67356	-0.925038	-0.897902	-0.888969	-0.925038
VIT_19s0014g00470	1.61824	2.32385	-1.20645	-1.05889	-1.59946	-1.72102
VIT_13s0064g00900	1.75417	2.36923	-0.68966	-1.14136	-1.51457	-1.73697
VIT_01s0011g03530	1.64155	2.60486	-0.434403	-1.22882	-0.467267	-1.1954
VIT_02s0154g00160	1.2967	2.69748	-1.98089	-1.04891	-0.421464	-1.54232
VIT_06s0009g00820	0.616671	3.43741	-1.24013	-0.494109	-1.10988	-1.47393
VIT_01s0026g00030	0.62605	2.96471	-1.44746	-0.473931	-0.785875	-1.10988
VIT_14s0030g00280	1.01673	2.91393	-1.1954	0.0795203	-0.570607	-2.12029
VIT_08s0056g01000	0.992768	2.72465	-1.25154	0.0519521	-0.880091	-1.51457
VIT_12s0028g03330	0.793549	2.83862	-0.845114	-0.1899	-0.845114	-1.55639
VIT_11s0037g00010	1.86921	1.93357	-0.934198	-0.162729	-1.39593	-1.1954
VIT_07s0005g03090	1.62605	2.51433	-0.761213	0.0379678	-1.01937	-1.17354
VIT_16s0050g01310	1.41864	2.52189	-0.467267	-0.487352	-0.962032	-0.79419
VIT_16s0148g00120	2.19954	2.0024	-0.268817	-0.217591	-0.990414	-0.37707
VIT_15s0048g02370	2.11659	1.77821	-0.802554	-0.130787	-0.67423	-0.528379
VIT_11s0118g00630	1.92473	2.15164	-0.925038	0.0749621	-1.01937	-0.298081
VIT_06s0004g05780	2.27103	3.40099	-0.549339	-0.00965017	-2.34618	-0.819428
VIT_13s0064g00480	2.42313	3.02207	-0.836501	-0.0489096	-1.75309	-0.40227
VIT_13s0064g01740	2.20163	2.81967	-1	-1	-1	-1
VIT_08s0040g03390	2.26704	2.64309	-0.40227	-0.681924	-1.12029	-0.769387
VIT_12s0059g01500	1.85466	3.07724	-1.1954	-0.280451	-1.65896	-0.925038
VIT_05s0020g02910	1.95853	3.07039	-0.785875	-0.819428	-1.39593	-1.07907
VIT_02s0025g03180	1.86129	3.08236	-0.636362	-0.584963	-1.54232	-0.681924
VIT_06s0080g01200	0.823749	1.72247	-1.51457	-1.4344	-1.12029	0.371094
VIT_08s0040g02590	0.432959	2.93294	-0.352302	-1.01937	-1.37084	0.869213
VIT_18s0001g12990	1.09761	2.31131	-0.130787	-0.802554	-1.03899	1.11326
VIT_05s0049g00150	1.90689	1.55254	-0.00965017	-1.81943	-1.01937	0.163499
VIT_03s0038g03690	1.43829	2.0024	-0.327952	-0.871267	-0.65139	-0.120294
VIT_10s0071g00370	1.76553	1.7852	0.385891	-0.990414	-0.40864	0.102098
VIT_05s0077g01280	2.40508	2.7977	0.128733	-0.494109	-1.80255	0.429393
VIT_10s0116g00780	2.36923	2.67356	0.0612002	-1.51457	-1.30996	0.180572
VIT_10s0003g02540	2.58336	2.41143	-0.130787	-0.943416	-0.943416	0.407806
VIT_11s0016g01800	1.36923	2.78381	0.15056	-0.614109	-1.40864	-1.34618
VIT_04s0008g05130	0.956057	3.16725	0.0473057	-0.125531	-1.06895	-0.819428
VIT_15s0021g00320	1.10657	2.37851	0.450661	0.0332762	-1.75309	0.146221
VIT_18s0001g07800	1.19535	2.38497	1.11103	0.193246	-1.21759	-0.304006
VIT_12s0134g00470	0.913288	2.89142	-0.542318	-0.245825	-1.70526	-0.263034
VIT_18s0089g00400	1.6009	2.76695	-0.346176	-0.109878	-1.27462	0.184809
VIT_18s0001g07550	1.35614	2.93985	0.298658	-0.65139	-1.24013	0.176323
VIT_14s0030g00020	1.5042	2.16242	-0.37707	0.222392	-2.34618	-2.01937
VIT_15s0048g00680	1.93483	2.16242	-0.206451	0.238787	-2.76939	-1.58496
VIT_13s0019g01040	2.10098	2.43385	0.226509	0.678072	-2.64386	-2.25154
VIT_13s0019g04220	1.35238	2.53439	0.128733	0.454176	-1.85378	-1.55639
VIT_12s0059g02480	1.87971	2.19954	-0.195396	0.539366	-2.14136	-1.10988
VIT_18s0001g05370	2.1943	2.16886	0.218265	0.600904	-2.07907	-0.736966
VIT_04s0008g03240	1.91329	2.54761	0.85599	0.246915	-2.80255	-0.713119
VIT_13s0084g00010	1.37666	2.19009	1.05427	-0.120294	-2.61411	-0.777608
VIT_16s0098g00150	1.93734	1.86262	1.09311	0.180572	-2.70526	-0.728973
VIT_01s0137g00720	2.69599	2.69451	0.111031	0.549258	-3.14136	-1.05889
VIT_16s0013g01990	2.69748	1.93734	0.829173	1.03328	-2.5009	-0.614109
VIT_01s0026g02550	2.7761	2.34577	0.47854	0.137504	-1.76939	-0.563483
VIT_02s0012g02540	3.21257	2.76553	0.790772	0.352382	-2.07907	-0.460634
VIT_09s0002g01060	2.30061	1.26303	0.890122	-1.17354	-1.87127	-1
VIT_11s0016g04360	2.65382	1.15704	0.684071	-0.109878	-1.75309	-1.16273
VIT_01s0011g05500	1.68257	1.30061	0.565597	0.0285692	-1.12029	-1.26303
VIT_18s0072g00010	1.86262	1.25096	1.05195	-0.606767	-1.00965	-0.925038
VIT_18s0001g09090	1.60723	2.14839	0.938599	0.226509	-0.925038	-1.78588
VIT_16s0013g01050	1.53937	1.16779	0.757023	0.823749	-1.24013	-1.2863
VIT_19s0015g01120	1.53771	1.32769	0.722466	1.12653	-1.54232	-1.25154
VIT_18s0001g06360	1.87447	1.75702	1.56884	0.429393	-1.47393	-0.990414
VIT_12s0028g01350	2.20789	1.98429	1.74703	1.0072	-1.52838	-1.38333
VIT_14s0030g01870	2.84197	2.36923	0.189034	-0.263034	0.154886	-0.925038
VIT_07s0205g00140	2.95233	2.23061	-0.125531	0.115477	-0.200913	-0.053893
VIT_06s0004g08250	3.23777	2.50843	0.385891	0.629162	0.124328	-0.454032
VIT_15s0048g02630	3.35285	2.21412	0.404177	0.918386	0.471621	-0.68966
VIT_19s0027g00020	3.15326	2.12983	0.443607	1.09536	0.742725	-0.304006
VIT_14s0128g00550	2.75987	1.56397	1.18057	0.47854	-0.0689474	-0.162729
VIT_04s0023g02020	2.61196	1.51096	1.13969	0.923466	-0.447459	-0.915936
VIT_08s0056g00610	2.41684	1.40599	0.367371	0.78799	-0.334001	-0.802554
VIT_06s0009g01740	2.56071	1.68855	0.542671	0.475085	0.0379678	-0.415037
VIT_07s0104g01260	3.36177	1.60723	0.785202	-0.315929	-0.570607	0.0191088
VIT_13s0074g00040	2.28688	2.20581	0.600904	-0.713119	-0.542318	-0.358454
VIT_10s0071g01100	2.85	2.07039	0.488858	-0.636362	-1.06895	-0.0995357
VIT_13s0067g03750	1.67506	1.65382	-0.274622	0.193246	-1.12029	-0.915936
VIT_13s0106g00610	1.99398	1.9386	0.201634	0.172061	-0.862496	-1.2863
VIT_18s0001g05160	2.64155	1.88622	0.318076	-0.00481702	-1.334	-0.68966
VIT_13s0019g01710	2.26404	2.26003	0.133125	0.250962	-1.08927	-0.880091
VIT_11s0016g03220	2.45593	2.16242	0.294743	0.425817	-1.06895	-0.454032
VIT_14s0128g00430	2.23573	2.13313	0.675063	0.111031	-0.570607	-0.395929
VIT_16s0050g01420	2.25197	2.0072	0.866578	0.15056	-0.556393	0.201634
VIT_19s0014g03350	1.93231	1.69896	-0.0841604	-0.0892673	-0.340075	-0.141356
VIT_01s0010g02690	1.89142	2.18587	0.238787	-0.257275	-0.1899	-0.184425
VIT_17s0000g01620	2.29474	1.52607	0.443607	-0.245825	-0.352302	-0.447459
VIT_05s0029g01580	1.95977	1.45066	0.0332762	-0.130787	-0.228819	-0.906891
VIT_17s0000g07740	2.21205	1.67807	0.102098	-0.162729	-0.769387	-0.570607
VIT_11s0037g01000	1.90046	1.79909	0.176323	0.0795203	-0.467267	-0.681924
VIT_12s0055g00030	2.79701	3.0012	-0.268817	-0.67423	-1.18442	-2.03899
VIT_12s0057g01000	2.82579	3.16511	-0.0340618	-1.18442	-0.40227	-1.54232
VIT_17s0000g01360	2.49313	3.50716	0.656878	-0.79419	-0.705257	-1.75309
VIT_14s0060g01820	3.82035	3.54308	0.20581	-0.447459	-1	-2.27462
VIT_18s0076g00210	3.92029	3.23726	0.34861	-0.427919	-0.853779	-1.38333
VIT_12s0028g03620	2.8679	3.56722	-0.257275	0.321928	-0.00481702	-1.62891
VIT_01s0150g00390	3.72973	3.66562	-0.871267	-1.01937	0.254997	-0.528379
VIT_08s0007g05270	3.3683	3.8859	-0.0892673	-0.79419	-0.713119	-1.05889
VIT_03s0038g00300	3.27302	3.27401	-0.934198	-0.395929	-0.358454	-0.67423
VIT_15s0046g01210	3.39735	3.36877	-0.643856	-0.0489096	-0.745003	-1
VIT_08s0007g04120	3.65497	3.77189	0.209973	1.03562	-2.55639	-1.61411
VIT_11s0016g00730	3.39461	3.88199	0.197446	0.613532	-1.61411	-1.52838
VIT_12s0121g00230	4.04235	3.20581	-0.0389941	1.38957	-1.12029	-2.03899
VIT_17s0000g04340	4.46118	3.33866	0.635367	0.329602	-1.42146	-1.80255
VIT_08s0040g02970	3.94642	3.38267	0.834576	0.85333	-0.681924	-1.58496
VIT_08s0058g00950	3.77364	2.32289	0.250962	0.389567	-0.52146	-2.25154
VIT_17s0000g01000	3.67318	2.02385	-0.268817	0.905608	-0.130787	-1.29808
VIT_11s0149g00090	3.29229	2.54761	-0.79419	0.411426	-1.05889	-0.915936
VIT_19s0014g00500	2.67356	2.97636	-0.21201	0.275007	-1.07907	-0.454032
VIT_10s0003g01260	2.95853	2.63304	0.128733	0.941106	-1.44746	-0.454032
VIT_04s0044g00880	3.01495	1.98793	0.713696	0.382206	-1.48735	-1.37084
VIT_07s0031g00500	3.41278	1.60407	0.39689	0.0191088	-0.753085	-1.16273
VIT_18s0001g10420	3.81352	2.28491	0.0565835	-0.251539	-1.5009	-1.90689
VIT_02s0241g00050	3.96501	2.8101	-0.0291463	0.0885939	-2.03899	-1.35845
VIT_04s0008g01980	3.15326	1.95358	-0.292181	-0.17897	-2	-1.17354
VIT_01s0010g03530	3.01733	2.94486	0.172061	0.128733	-1.34618	-1.334
VIT_18s0122g00680	3.07496	2.63691	-0.315929	0.176323	-1.57061	-1.68966
VIT_17s0000g01260	3.18375	2.61824	-0.309955	-0.268817	-1.54232	-1.26303
VIT_03s0063g01690	2.84866	3.17579	1.92979	2.4638	-1.4344	-0.897902
VIT_09s0002g00420	3.82443	3.04614	0.736966	1.39872	-1.80255	-0.570607
VIT_07s0104g00890	4.1246	3.79978	1.53107	1.9386	-1.09954	-0.240134
VIT_15s0046g00040	3.34009	3.85466	1.58656	1.00959	-0.952694	-0.514573
VIT_19s0027g01890	3.35238	3.90464	1.73263	1.48027	-1.334	0.0285692
VIT_15s0046g01230	2.08859	4.08718	1.9222	0.804604	-1.58496	-0.494109
VIT_08s0007g01050	2.33914	3.54185	1.9386	1.32193	-1.68966	-0.549339
VIT_04s0008g07110	2.73697	3.29719	0.9855	1.53605	-1.38333	-0.785875
VIT_17s0053g00590	2.11659	3.71663	0.722466	1.43829	-0.68966	-0.286304
VIT_19s0085g00740	2.58015	3.61628	1.11326	1.4974	-1.01937	-0.0892673
VIT_06s0061g01290	4.68725	2.9684	1.47508	-0.120294	-0.897902	0.234706
VIT_05s0102g00370	4.57974	2.31711	1.38221	0.31034	-0.251539	0.20581
VIT_19s0085g00030	3.62605	3.09029	0.172061	0.128733	-0.925038	0.180572
VIT_11s0052g00800	4.28491	3.49655	0.701919	0.184809	-0.888969	0.254997
VIT_18s0041g00900	3.81865	3.21826	0.572081	0.619804	-0.500898	0.432959
VIT_04s0008g03640	4.17659	2.94423	0.34861	0.552541	-0.745003	0.0473057
VIT_08s0040g00060	4.30378	2.99458	0.975752	0.565597	-0.681924	0.218265
VIT_01s0026g01910	3.5435	3.16939	1.22856	0.102098	-1.73697	-0.599462
VIT_10s0003g03080	3.74918	3.85732	1.1177	-0.173536	-1.37084	-0.871267
VIT_02s0025g00180	2.98732	2.79701	0.95109	0.858644	-0.584963	-0.915936
VIT_17s0000g08900	2.76695	2.74129	1.04498	1.05889	-0.705257	-0.460634
VIT_07s0005g03960	2.50758	3	0.826464	0.172061	-1.73697	-1.10988
VIT_14s0066g01500	2.50589	3.10042	0.555816	0.393233	-1	-1
VIT_14s0171g00180	3.03738	2.85067	0.958533	0.352382	-1.18442	-0.934198
VIT_16s0039g01910	2.90432	3.0042	1.16135	0.337235	-0.943416	-1.10988
VIT_03s0063g00770	3.56356	3.5269	0.359896	1.10434	-0.666576	-0.473931
VIT_08s0056g01290	3.04498	3.84465	0.197446	0.728283	-0.352302	-0.745003
VIT_07s0129g00300	2.99216	4.24666	0.20581	0.845323	-0.162729	-0.728973
VIT_13s0084g00080	3.14187	3.61785	0.931053	0.159199	-0.157356	0.234706
VIT_10s0003g01310	3.1049	3.37156	0.0565835	0.604071	-0.0740006	-0.223194
VIT_18s0001g14690	3.02739	3.42537	0.522725	0.415037	-0.721024	-0.206451
VIT_12s0028g01160	3.02266	3.26053	0.578536	0.39689	-0.274622	-0.195396
VIT_14s0060g02650	-2.34618	2.79355	-2.09954	-1.30996	-1.57061	-1.87127
VIT_02s0154g00280	-2.37084	2.62761	-1	-2.73697	-1	-1
VIT_07s0031g02650	-1.80255	2.2459	0.00480099	-0.643856	-1	-1.51457
VIT_19s0014g05410	-2.32193	2.81831	-0.473931	-0.658963	-0.0639118	-1.44746
VIT_15s0021g00620	-2.67423	2.0852	-1	-1	-1	-1
VIT_07s0005g05300	-1.22882	3.40781	-1	-1	-1	-1
VIT_03s0063g02380	-1	3.62838	-1	-1	-1	-1
VIT_08s0040g00550	-0.68966	3.05369	-1.22882	-1.2863	-1	-1
VIT_06s0009g02610	-0.802554	2.3552	-1	-1	-1	-1
VIT_19s0015g01980	-0.340075	4.57269	-1	-0.810966	-1	-1
VIT_16s0039g00860	-1.26303	2.85133	-0.0995357	0.242857	-1.85378	-2.22882
VIT_15s0021g00810	-1	3.23419	-0.309955	0.616671	-1.38333	-1.48735
VIT_18s0001g00660	-1.44746	3.9222	-0.136062	-0.00481702	-0.827939	-1.90689
VIT_03s0091g00880	-2.18442	4.98959	-1	-2.22882	-1	-1
VIT_07s0185g00050	-1	2.64	-1	-2.32193	-3.37084	-1
VIT_16s0022g00580	-1	3.11159	-1	-2.64386	-2.67423	-1
VIT_08s0007g04360	-2.44746	2.67431	-0.681924	-2.70526	-2.67423	-0.358454
VIT_11s0016g00430	-3.01937	3.76058	0.282934	-0.761213	-1.61411	-2.42146
VIT_13s0074g00740	-2.42146	3.73046	0.672048	0.0931094	-2.67423	-1.87127
VIT_16s0022g00560	-2.76939	4.78014	-0.370838	-0.460634	-2.94342	-2.8365
VIT_12s0028g02850	-4.90689	2.9988	-3.37084	-1.62891	-1	-1
VIT_13s0074g00780	-1	4.41819	-1.76939	2.28293	-2.58496	-1
VIT_18s0117g00100	-1	6.3443	-1	1.07039	-1	-1
VIT_14s0066g01960	-1.01937	7.48107	-0.563483	1.14839	-0.845114	-0.125531
VIT_14s0066g01970	-2.94342	4.56316	0.00480099	0.222392	0.923466	2.05543
VIT_04s0043g00690	-1	6.1079	1.24691	-0.104697	-1.48735	1.79494
VIT_14s0066g01010	-4.52838	3.9342	2.16564	1.36364	-5.22882	-1.4344
VIT_17s0000g10090	-3.64386	3.86987	1.7137	1.13093	-4.52838	-1.48735
VIT_18s0001g02230	-2.64386	4.15056	1.22239	0.234706	-4.42146	-1.48735
VIT_12s0057g01410	-3.32193	2.3552	0.704872	-0.862496	-4.52838	-2.20645
VIT_01s0011g06470	-4.42146	3.60684	-1	1.86394	-2.98089	-1
VIT_01s0011g03840	-3.8365	1.93357	0.588165	1.41143	-3.98089	-4.22882
VIT_18s0001g03090	-2.20645	2.43207	1.74703	2.18057	-3.47393	-3.01937
VIT_11s0016g02610	-3.47393	2.82782	0.759866	1.59296	-1.51457	-1.76939
VIT_04s0008g02710	-2.42146	1.66751	1.42761	2.02266	-0.915936	-1.67423
VIT_17s0000g06930	0.678072	-2.32193	-0.769387	0.690045	-3.01937	-4.76939
VIT_05s0077g00870	0.432959	-3.52838	0.578536	0.629162	-2.22882	-3.47393
VIT_18s0001g13670	0.734077	-2.07907	0.128733	1.01673	-3.32193	-2.07907
VIT_11s0206g00030	-1	-3.64386	0.0379678	0.0840643	-3.18442	-2.8365
VIT_07s0005g05890	-1	-4.22882	-0.389615	0.389567	-3.47393	-1.55639
VIT_16s0098g00220	-1.44746	-1.52838	0.47854	0.801848	-2.42146	-3.09954
VIT_19s0093g00110	-1.87127	-1.68966	2.25902	1.92726	-2.87127	-4.64386
VIT_04s0044g00360	-1.54232	-1.03899	0.973305	-1.90689	-4.42146	-4.14136
VIT_14s0068g00440	0.352382	-2.98089	-1	-1	-1	-1
VIT_01s0011g01310	0.701919	-2.47393	-1	-1	-1	-1
VIT_15s0048g02690	0.193246	-2.87127	0.748461	-1.08927	-1	-1.75309
VIT_11s0016g01970	0.259021	-2.58496	-0.753085	-2.03899	-2.27462	-2.47393
VIT_04s0069g00720	-1.14136	-3.47393	0.15056	-3.27462	-1	-1.10988
VIT_13s0064g01580	-1	-4.76939	0.385891	-0.0489096	-1	-1
VIT_06s0004g05050	-1	-4.76939	0.644625	0.128733	-0.251539	-0.915936
VIT_10s0092g00650	-1	-4.90689	0.695994	-1.18442	-0.370838	-2.01937
VIT_04s0044g00650	2.27003	-5.22882	-0.584963	-1	-1	0.359896
VIT_06s0009g00370	0.895303	-3.05889	0.895303	-0.880091	0.367371	1.36737
VIT_15s0024g00410	2.15597	-3.8365	2.0072	-1.5009	-0.494109	1.44714
VIT_19s0014g04930	2.93546	-1.70526	2.59056	-1.20645	-1	-2.39593
VIT_15s0048g02660	2.25298	-3.52838	-1.67423	-3.14136	-1	-4.05889
VIT_18s0089g00140	2.12322	-3.01937	-1	-1	-1	-3.52838
VIT_01s0127g00120	1.56722	-4.32193	-1	-1	-1	-6.22882
VIT_03s0063g01860	0.393233	-5.22882	-3.76939	-2.98089	-1.72102	-5.64386
VIT_10s0003g01010	2.36364	2.42671	0.41864	0.238787	-3.47393	-6.22882
VIT_10s0003g01410	2.10434	2.72973	-0.315929	0.882317	-1.58496	-5.90689
VIT_12s0028g00040	4.20425	3.28836	-0.67423	0.687061	-3.01937	-5.90689
VIT_08s0056g01480	4.86047	4.70395	-0.109878	1.79632	-2.55639	-6.64386
VIT_06s0061g00360	3.70892	4.11409	0.363638	0.333424	1.36551	-5.42146
VIT_02s0025g02190	2.16457	3.42492	1.54102	0.337235	-1	-4.64386
VIT_14s0068g01160	1.22445	4.27451	0.238787	1.53439	-1.35845	-4.90689
VIT_02s0033g00290	0.863938	3.56356	0.81284	2.09536	-1.88897	-3.47393
VIT_17s0000g09550	2.71663	3.77996	-0.836501	1.80047	0.662965	-6.22882
VIT_19s0014g03240	1.666	3.00839	0.495695	2.27003	-0.0841604	-4.22882
VIT_17s0000g09400	1.60881	3.255	-0.292181	2.01911	0.234706	-5.42146
VIT_06s0004g01470	1.43829	2.93105	-0.500898	1.68107	1.18692	-4.52838
VIT_08s0040g00820	3.63614	4.20137	1.07952	4.39575	1.10657	-2.47393
VIT_13s0074g00730	5.39197	4.99564	2.40054	3.3697	2.52105	-3.22882
VIT_12s0142g00640	2.44626	2.41864	-2.80255	-2.47393	-2.98089	-3.05889
VIT_10s0003g00600	3.3552	2.48027	-3.70526	-2.5009	-2.64386	-2.52838
VIT_07s0005g01430	2.89982	2.59534	-2.73697	-2.90689	-2	-2.94342
VIT_15s0046g01340	3.69302	2.74631	-2.80255	-2.64386	-1.67423	-3.37084
VIT_04s0023g01550	2.78729	2.62605	-2.52838	-1.94342	-1.17354	-2.55639
VIT_06s0004g06900	3.42939	1.75132	-3.58496	-3.37084	-2.5009	-3.64386
VIT_08s0007g04510	3.13038	3.57773	-3.05889	-2.42146	-1	-4.76939
VIT_01s0010g03560	3.30889	3.90945	-2.5009	-2.05889	-1	-4.32193
VIT_13s0019g02540	3.05253	2.92726	-3.01937	-3.27462	-1	-4.32193
VIT_01s0011g03880	4.01584	3.04148	-3.64386	-2.8365	-1	-5.42146
VIT_12s0059g01900	3.33295	3.08406	-2.76939	-4.64386	-1	-4.42146
VIT_13s0019g02530	3.8679	2.34388	-2.20645	-3.76939	-1	-3.98089
VIT_01s0127g00400	3.904	2.51937	-4.76939	-3.8365	-1	-3.8365
VIT_12s0028g02990	4.61863	1.28096	-4.05889	-3.32193	-1	-3.01937
VIT_08s0007g00700	5.62654	2.27003	-6.22882	-3.52838	-1	-2.8365
VIT_08s0007g00670	5.16511	3.11047	-3.47393	-4.05889	-1	-6.64386
VIT_04s0069g01120	2.42134	2.40236	-3.76939	-4.64386	-4.05889	-5.05889
VIT_04s0044g01380	3.80701	1.38221	-5.64386	-3.14136	-3.64386	-4.52838
VIT_07s0005g00870	2.62059	0.995183	-4.14136	-0.67423	-1.54232	-5.22882
VIT_02s0087g00640	4.07296	2.38313	-4.42146	-0.728973	-0.447459	-4.90689
VIT_04s0008g04160	5.71516	0.522725	-5.42146	-0.500898	-1.72102	-4.76939
VIT_05s0049g01650	2.54267	2.28096	-1.62891	-1.61411	-3.32193	-5.05889
VIT_10s0116g01040	2.96655	2.29768	-0.980891	-0.643856	-2.76939	-5.05889
VIT_11s0149g00130	2.83727	3.04731	-1.87127	-1.39593	-2.5009	-3.90689
VIT_18s0001g01210	2.89466	2.32289	-1.14136	-0.836501	-2.67423	-3.52838
VIT_15s0048g02500	2.88557	2.84599	-2	0.250962	-3.32193	-4.22882
VIT_01s0011g04260	5.39826	2.67356	-2.73697	-0.915936	-3.14136	-4.64386
VIT_01s0026g02030	4.57249	3.11437	-2.42146	-0.888969	-3.42146	-4.14136
VIT_19s0176g00040	4.13367	1.8413	-2.25154	-0.952694	-2.58496	-3.8365
VIT_08s0007g04950	4.44648	2.37944	-1	-3.32193	-3.09954	-4.42146
VIT_05s0124g00080	4.55418	1.63691	-1.39593	-2.27462	-2.76939	-4.14136
VIT_04s0008g03920	4.73354	2.9342	-0.245825	-1.55639	-3.8365	-4.64386
VIT_14s0068g00270	2.3627	5.41571	-1.27462	-0.395929	-1	-3.76939
VIT_04s0044g00310	2.55172	4.23726	-1.68966	0.282934	-0.67423	-3.32193
VIT_11s0016g02110	4.31928	4.7673	-3.01937	-0.990414	-1.32193	-4.05889
VIT_15s0046g00730	3.79424	4.32337	-1.65896	-1.27462	-1	-4.52838
VIT_18s0001g03670	4.70966	4.30037	-0.819428	-1.25154	-2.29808	-5.05889
VIT_05s0020g04690	4.68837	4.63304	-0.962032	-1.02915	-1.38333	-4.64386
VIT_08s0007g03680	4.25827	5.71269	-0.827939	-0.570607	-1.30996	-3.52838
VIT_09s0018g01670	4.5739	4.81044	-1.21759	0.83996	-1.24013	-3.70526
VIT_09s0002g01670	5.0063	4.35238	-1.8365	-3.14136	-1	-3.27462
VIT_11s0016g04810	4.83525	2.24286	-1.38333	-1.18442	-3.58496	-2.73697
VIT_01s0011g03210	5.94579	3.47638	-1.01937	-1.03899	-3.52838	-2.94342
VIT_10s0003g04240	4.44956	3.1964	-1.54232	-1.96203	-2.29808	-2.27462
VIT_03s0038g02180	4.63633	3.19797	-1.67423	-1.21759	-1.65896	-2.73697
VIT_17s0000g03750	4.72738	3.03621	-1.01937	-0.480626	-1.96203	-3.22882
VIT_18s0001g13080	5.73534	3.50504	-1.27462	-0.52146	-2.25154	-2.90689
VIT_15s0048g01940	5.25134	3.95946	-1.37084	-0.897902	-1.85378	-2.25154
VIT_11s0103g00050	6.06472	3.29229	0.545968	-1.39593	-1	-3.76939
VIT_19s0014g00150	4.14105	2.32	-0.415037	-0.535332	-0.810966	-3.37084
VIT_13s0073g00600	4.62994	2.6997	-1.334	-2.39593	-1	-4.32193
VIT_10s0003g02440	4.08605	3.97116	-1.09954	-1.72102	-0.658963	-3.09954
VIT_07s0005g01310	4.70837	3.54597	-1.38333	-1.152	-1	-4.42146
VIT_12s0028g02400	4.92932	3.04439	-0.925038	-1.05889	-1	-3.18442
VIT_18s0001g13380	5.15758	3.35097	-0.728973	-1	-1	-3.8365
VIT_04s0023g02210	6.04381	3.74918	-1.92504	-0.906891	-2.8365	-6.22882
VIT_18s0001g06690	6.73127	4.09761	0	-2.05889	-1	-6.22882
VIT_11s0016g01020	4.5294	4.52774	-3.18442	0.271027	-0.556393	-5.90689
VIT_03s0038g01830	4.35497	3.75275	-2.58496	-2.39593	-5.42146	-4.22882
VIT_01s0011g02800	5.0798	2.90817	-1.68966	-2.16273	-4.76939	-3.47393
VIT_18s0001g10040	4.74344	3.82646	-0.606767	-2.5009	-5.64386	-3.90689
VIT_14s0060g01840	4.80237	3.20268	-0.52146	-1.07907	-5.64386	-4.14136
VIT_19s0015g02070	3.74775	3.12598	-2.44746	-4.42146	-5.22882	-4.90689
VIT_05s0124g00100	5.06192	3.59296	-1.67423	-3.64386	-4.76939	-4.76939
VIT_01s0182g00130	4.39712	3.854	-2.20645	-1.70526	-5.90689	-5.90689
VIT_19s0027g01820	4.59096	3.67882	-0.990414	-0.810966	-7.22882	-5.64386
VIT_17s0000g02590	4.61804	2.58816	-3.70526	-1.72102	-5.64386	-5.22882
VIT_07s0104g01620	4.35144	3.41143	-4.42146	-1.4344	-4.32193	-5.22882
VIT_08s0056g01530	4.06465	2.55008	-2.70526	-2	-3.58496	-6.64386
VIT_05s0020g00950	4.46074	1.18481	-1.04891	-2.73697	-7.22882	-5.64386
VIT_09s0002g02210	5.79822	2.70413	0.807355	-2.67423	-4.90689	-4.14136
VIT_10s0003g05420	4.42984	2.45505	2.22342	-0.962032	-4.90689	-5.64386
VIT_04s0008g02770	2.23061	5.56122	-1.20645	-1.03899	-3.58496	-5.90689
VIT_17s0000g05060	4.15623	6.04396	-1.54232	-0.0892673	-5.05889	-5.64386
VIT_17s0000g06730	3.51854	0.41864	-1.24013	-4.76939	-1	-2.64386
VIT_12s0059g01010	3.20633	1.4991	0.209973	-4.22882	-1	-3.27462
VIT_10s0092g00070	3.38865	1.5737	-0.990414	-5.22882	-1	-1.70526
VIT_08s0007g06870	4.2555	2.5294	-1	-5.22882	-1	-1
VIT_08s0040g02070	4.01555	4.01525	-1	-4.90689	-1	-1
VIT_02s0025g01300	4.52795	3.71663	-1.01937	-4.52838	-1	-1
VIT_16s0022g02090	4.04876	1.96594	-1.4344	-3.76939	-1	-1
VIT_10s0003g02110	4.52314	1.47508	-1.07907	-3.05889	-1	-1
VIT_03s0110g00430	4.63556	1.79909	-0.614109	-3.58496	-1	-1
VIT_05s0020g01690	4.36714	1.58496	-0.053893	-2.8365	-2.5009	-1
VIT_15s0021g00310	1.07496	3.09142	-1	-4.76939	-1	-1
VIT_08s0007g00660	2.54761	2.77189	-1	-5.42146	-1	-1
VIT_12s0028g02630	2.33724	1.61667	-2.32193	-6.22882	-1	-1
VIT_02s0012g00990	3.63188	3.35332	0.0749621	-4.90689	-1	-4.64386
VIT_09s0002g05930	5.15772	2.06695	-1.55639	-4.42146	-1	-3.22882
VIT_01s0010g02520	6.10098	1.75417	-0.666576	-2.67423	-1.26303	-3.98089
VIT_11s0052g00410	5.86055	1.1635	1.65992	-4.32193	-1	-2.61411
VIT_05s0020g00420	7.48537	3.255	-3.37084	-5.05889	-5.05889	-4.14136
VIT_10s0116g01580	6.04162	2.68781	-1	-4.05889	-3.58496	-1
VIT_06s0004g07900	7.87082	3.94298	-1.81943	-3.70526	-2.80255	-2.37084
VIT_10s0003g00620	4.35191	4.42515	-4.76939	0.0795203	1.40599	-3.05889
VIT_03s0038g04620	4.92204	5.03401	-3.32193	2.96594	2.87316	-2.70526
VIT_03s0038g02220	4.40984	3.45374	-4.64386	-1.09954	-2.25154	-2.34618
VIT_12s0134g00090	4.18534	4.04527	-5.42146	-2.55639	-1	-1
VIT_06s0004g04050	4.28983	4.74452	-4.22882	-2.67423	-1	-1
VIT_08s0040g01970	2.46641	5.05224	-4.32193	-0.68966	-1	-1
VIT_14s0128g00110	3.04148	4.58596	-3.05889	-0.599462	0.176323	-0.658963
VIT_11s0052g00490	4.74488	4.87725	-3.47393	0.49228	-0.460634	-0.915936
VIT_12s0035g01340	4.88378	5.94087	-1.98089	0.745596	0.246915	-0.769387
VIT_01s0011g02250	7.1634	5.19351	-5.64386	-2.05889	-5.64386	-4.22882
VIT_13s0064g01750	5.9627	5.91377	-3.64386	-0.263034	-5.22882	-6.64386
VIT_11s0206g00110	5.54453	5.08619	-2.80255	-0.897902	-4.64386	-4.05889
VIT_12s0059g02420	5.6777	6.19692	-3.47393	0.263034	-3.90689	-4.42146
VIT_13s0064g01660	7.00604	6.8672	-4.22882	-0.184425	-3.14136	-3.14136
VIT_16s0100g00230	6.98516	6.68986	-3.90689	0.102098	-2.98089	-3.27462
VIT_04s0023g03110	6.40639	6.3852	-2.25154	0.895303	-2.98089	-3.32193
VIT_12s0134g00140	6.85391	6.90143	-1.94342	0.400538	-3.22882	-4.32193
VIT_08s0058g00350	7.02407	6.98459	-2.47393	0.687061	-3.22882	-3.64386
VIT_14s0060g02480	3.84231	3.01018	-1.4344	-2.73697	-7.22882	-1
VIT_06s0004g04000	4.44073	3.22239	0.363638	-0.880091	-7.22882	-0.827939
VIT_01s0150g00480	4.76146	3.84432	-0.0943924	-1.8365	-6.22882	-1
VIT_12s0055g00820	5.42995	1.93357	-0.454032	-0.162729	-6.22882	-1
VIT_14s0128g00190	6.14547	2.62838	-0.168123	-1.1954	-5.22882	-1.61411
VIT_02s0025g00580	5.7725	2.90046	-1	-2.70526	-5.64386	-1
VIT_10s0042g00080	7.41066	3.4807	-1	-1.88897	-4.90689	-1
VIT_16s0100g00240	4.7899	4.88671	-2.32193	-1.07907	-3.58496	-2.61411
VIT_16s0022g00860	4.79424	4.73281	-2.25154	-2.14136	-3.90689	-1
VIT_04s0043g00300	6.59256	3.60684	-3.18442	-2.25154	-4.14136	-1
VIT_10s0003g02960	6.79472	5.65153	-2.27462	-1.54232	-3.76939	-1
VIT_04s0043g00290	6.04745	4.12267	-2.29808	-1.03899	-5.05889	-1
VIT_13s0019g01920	6.91791	4.3852	-1.42146	-0.104697	-4.42146	-1
VIT_19s0085g00900	3.84699	5.34731	-0.434403	-0.352302	-4.76939	-2.61411
VIT_06s0004g03050	4.09114	6.17093	-0.990414	-0.120294	-4.32193	-3.37084
VIT_19s0014g01690	4.17446	5.50822	-1.07907	1.0048	-4.14136	-3.09954
VIT_04s0044g00990	4.47292	6.56234	-0.370838	0.389567	-3.70526	-4.64386
VIT_19s0014g05130	4.8535	6.26128	-0.50772	0.275007	-3.58496	-4.05889
VIT_10s0405g00040	4.61843	6.6843	-0.467267	0.604071	-2.94342	-1
VIT_06s0004g05870	3.97239	7.23477	-0.389615	0.352382	-4.05889	-2.22882
VIT_04s0008g06670	3.45066	6.64918	-1.47393	-0.0639118	-3.22882	-2.12029
VIT_09s0002g05320	2.97085	7.00566	-1.65896	0.407806	-3.98089	-1
VIT_05s0102g00880	3.46728	5.47292	-1.42146	-0.52146	-6.22882	-2.8365
VIT_03s0063g02340	3.53978	4.78921	-0.980891	-0.943416	-6.22882	-1
VIT_18s0001g12400	4.51496	4.45066	0.294743	-0.810966	-4.64386	-1.32193
VIT_10s0116g00710	3.93263	4.94408	0.588165	0.0238467	-4.05889	-1
VIT_17s0000g08920	5.67582	5.44791	0.823749	-0.286304	-4.52838	-1.76939
VIT_05s0049g01740	5.7092	5.09747	-0.0193653	-0.217591	-5.42146	-2.37084
VIT_11s0016g00680	6.04578	5.02163	0.385891	-0.434403	-4.52838	-3.05889
VIT_19s0090g01160	5.5222	5.35943	0.532733	0.759866	-5.22882	-0.745003
VIT_19s0014g04720	5.90521	4.61235	-0.292181	-0.666576	-5.22882	-1
VIT_14s0060g01780	5.94314	3.86328	0.119909	0.536053	-4.32193	-1
VIT_14s0060g00330	7.00727	4.49633	1.62449	0.793549	-2.34618	-6.64386
VIT_14s0060g01830	5.8757	4.97193	0.713696	1.16564	-1.8365	-3.90689
VIT_05s0077g02260	6.33955	6.02185	1.93609	1.12433	-2.18442	-4.14136
VIT_13s0320g00060	5.31687	4.99594	1.67657	1.27302	-1.80255	-2.39593
VIT_06s0004g00960	5.71214	5.38899	0.863938	2.06235	-1.20645	-2.8365
VIT_01s0011g04080	5.491	5.04337	1.63227	0.0473057	-5.42146	-4.90689
VIT_08s0058g01010	5.21555	5.09353	2.02739	0.931053	-4.76939	-3.14136
VIT_05s0020g04220	4.81216	4.82358	1.82375	1.17845	-2.94342	-4.22882
VIT_11s0016g01850	4.98596	4.51496	1.53107	0.678072	-3.47393	-4.90689
VIT_10s0003g01100	5.4544	4.77189	1.45768	1.0024	-2.8365	-5.05889
VIT_04s0008g03550	7.11315	4.51496	1.59932	0.218265	-4.42146	-4.05889
VIT_14s0060g01850	5.80993	4.82205	0.475085	1.18903	-3.76939	-3.76939
VIT_01s0026g00350	6.63377	5.43763	1.1375	0.176323	-2.98089	-3.42146
VIT_18s0001g05580	8.92219	4.29205	-1.02915	-1.35845	-1.26303	-2.58496
VIT_15s0046g02000	8.16653	5.1819	0.748461	-1	-1.67423	-1.92504
VIT_18s0041g02150	6.39706	4.07525	0.499102	-0.173536	-1.24013	-1.94342
VIT_11s0103g00190	7.18907	4.99684	-0.125531	0.180572	-1	-2.80255
VIT_05s0062g01260	7.9405	6.25399	-0.827939	-0.240134	-3.8365	-4.90689
VIT_01s0011g02500	6.65559	5.47573	-0.681924	-0.274622	-4.32193	-3.05889
VIT_12s0059g01750	6.55842	6.5696	-1.00965	-0.292181	-3.90689	-3.64386
VIT_08s0040g02350	5.374	5.76368	-0.40227	1.01197	-2.64386	-2.44746
VIT_08s0040g02340	5.71214	6.2719	0.159199	0.59773	-2.76939	-2.94342
VIT_11s0016g05840	6.94743	5.72165	-0.340075	0.745596	-3.32193	-1.03899
VIT_15s0021g02300	6.51444	6.55913	0.63846	0.765535	-2.76939	-1.67423
VIT_06s0004g02710	6.93546	6.46972	-0.315929	0.629162	-2.58496	-3.42146
VIT_04s0023g01600	8.33683	7.18411	-0.17897	0.736966	-2.8365	-3.01937
VIT_14s0083g01150	8.17589	5.70543	-0.309955	0.552541	-3.05889	-2.03899
VIT_02s0025g00740	8.46771	5.9479	-0.37707	0.306457	-1.58496	-2.64386
VIT_12s0057g01520	-3.90689	1.4991	0.847997	0.154886	-3.58496	-0.514573
VIT_04s0008g06020	-3.64386	1.47854	0.189034	-0.584963	-2.90689	0.684071
VIT_18s0089g00740	-2.52838	0.0749621	0.242857	0.447138	-3.8365	-0.934198
VIT_11s0016g01290	-3.01937	-0.434403	-0.897902	-0.251539	-1.46063	0.933573
VIT_06s0009g01450	-2.76939	0.801848	0.0332762	0.0238467	-1.8365	1.27898
VIT_18s0001g12860	-2.8365	0.382206	0.871844	-0.421464	-0.606767	1.79216
VIT_03s0038g00550	-3.70526	2.33819	1.13093	-2.55639	-3.52838	1.93985
VIT_03s0038g00500	-3.01937	2.84532	1.87447	-1.61411	-2.73697	2.5319
VIT_08s0056g01410	-5.05889	1.29082	1.31615	-1.81943	-1	1.71809
VIT_01s0011g05150	-1.37084	2.99518	3.38497	-2.44746	-1	1.33533
VIT_03s0063g01410	-2.37084	3.58656	3.6584	-0.658963	-2.70526	2.04498
VIT_08s0007g03500	-4.90689	0.115477	2.71223	0.968398	-2.34618	0.20581
VIT_17s0000g08550	-4.52838	1.55582	2.32865	1.70192	-3.27462	0.793549
VIT_19s0085g00750	-4.76939	2.74488	3.41368	2.02621	-2.52838	0.389567
VIT_02s0025g00120	-3.27462	0.890122	4.79303	3.03914	-4.14136	2.17632
VIT_15s0046g02150	-2.52838	0.180572	4.64655	2.33247	0.00480099	3.02444
VIT_01s0011g06360	-4.64386	1.09761	3.34293	2.62838	-1.12029	2.84733
VIT_08s0007g03510	-2.80255	1.40962	3.70192	1.99518	-1.57061	1.86658
VIT_18s0001g15100	-2.12029	0.920928	1.43296	-1.22882	-5.90689	2.774
VIT_11s0016g01520	0.63846	1.60723	2.48371	-1.25154	-6.64386	1.83188
VIT_18s0041g01500	-1.64386	3.52482	2.34009	-0.206451	-6.64386	0.41864
VIT_18s0001g04750	-1	1.1088	3.7301	2.45593	-5.90689	-0.827939
VIT_16s0013g00870	-1	4.96332	5.27289	3.75596	-5.64386	3.4957
VIT_14s0006g02320	-2.70526	6.09887	3.73733	3.57491	-4.32193	0.887525
VIT_14s0068g01290	-1.00965	3.0024	2.34388	2.33151	-2.27462	2.1964
VIT_14s0083g00840	0.47854	4.19009	2.08633	2.33819	-2.73697	1.16135
VIT_12s0059g02690	-1.47393	5.29744	2.90368	1.21412	-2.8365	0.47854
VIT_19s0177g00240	-1	3.72028	3.34908	2.09085	-4.05889	0.5025
VIT_06s0080g00340	-1	4.42671	3.79042	2.35614	-5.64386	1.2967
VIT_10s0042g00250	-0.819428	0.374808	-3.05889	-0.535332	-1.13079	-3.27462
VIT_15s0045g00710	-0.309955	0.62293	-2.12029	-0.0639118	-0.728973	-3.37084
VIT_16s0098g00030	-1.81943	0.499102	-2.37084	0.519374	-0.141356	-3.01937
VIT_12s0059g02700	-1.16273	0.519374	-1.96203	0.184809	-0.713119	-2.67423
VIT_13s0158g00190	-1.152	-1.14136	-1.92504	0.39689	-0.713119	-3.05889
VIT_16s0039g00930	-1.42146	-0.184425	-0.943416	0.47854	-0.681924	-3.27462
VIT_16s0039g00910	-2.37084	-0.309955	-2.55639	0.404177	0.39689	-1.52838
VIT_14s0066g00780	-1.8365	0.282934	-1.67423	0.59773	0.238787	-1.55639
VIT_08s0040g01770	-2	-1.152	-1.87127	0.167786	-0.421464	-1.34618
VIT_02s0025g01980	-1.58496	-1.00965	-2.94342	-0.334001	1.09311	-1.57061
VIT_18s0089g00600	-3.47393	-0.628906	-2.67423	0.659925	-0.223194	-2.20645
VIT_17s0000g08760	-0.346176	-1.22882	-2.8365	0.610385	-0.658963	-1.59946
VIT_02s0033g00770	-2.8365	-0.0943924	-2.32193	0.675063	1.71516	-3.76939
VIT_14s0066g00760	-2.39593	0.119909	-0.934198	0.687061	0.793549	-2.61411
VIT_01s0026g01730	-3.09954	-2	-2.14136	0.374808	-0.542318	-3.18442
VIT_02s0025g04360	-1.68966	-2.20645	-1.21759	0.102098	-0.577767	-3.76939
VIT_01s0010g00760	-1.76939	-3.22882	-2.09954	0.159199	-0.785875	-1.152
VIT_03s0063g01790	-1.80255	-2.34618	-1.52838	-0.535332	0.436517	-2.03899
VIT_09s0018g02080	-3.42146	0.290818	-1.80255	-2.5009	-2.07907	-2.12029
VIT_02s0025g00680	-3.14136	0.359896	-2.80255	-1.27462	-1.47393	-2.94342
VIT_09s0002g00530	-2.58496	1.44007	-2.87127	-0.52146	-0.836501	-1.54232
VIT_02s0025g00700	-1.67423	0.719549	-2.98089	-0.862496	-1.00965	-1.05889
VIT_07s0005g01160	-2.22882	0.757023	-1.76939	-1.35845	-1.04891	-1.58496
VIT_17s0000g06780	-4.32193	0.669027	-4.52838	-1.37084	-0.352302	-3.22882
[truncated: 6,686 more rows]

## Sheet: S5 S6 specific
	S5-CARLOS-ave	S6-CARLOS-ave	S7-CARLOS-ave	S5-NOB-ave	S6-NOB-ave	S7-NOB-ave
VIT_05s0049g00520	0.751321	12.3307	14.1388	8.9786	13.3087	14.0745
VIT_19s0090g01340	8.82827	12.9104	14.794	10.7702	13.977	13.8188
VIT_01s0011g05110	5.16404	12.8472	13.2472	8.35466	12.5989	13.581
VIT_06s0004g02560	-2.20645	12.5917	13.2241	7.65086	11.0388	13.5442
VIT_01s0011g05140	5.22689	12.3729	12.9605	8.20374	12.3298	13.2131
VIT_12s0059g00590	11.1794	12.3871	13.0398	11.3783	12.3568	12.9927
VIT_01s0010g02030	5.62342	11.7546	9.8394	7.38865	9.80548	12.9376
VIT_14s0081g00030	1.25701	12.1999	14.3717	9.46657	13.9483	12.8813
VIT_04s0079g00690	2.488	12.2642	12.8704	8.04979	12.759	12.8626
VIT_04s0008g04020	13.3329	12.477	11.087	11.5014	11.0913	12.612
VIT_04s0008g04050	13.0474	12.2405	10.8795	11.2072	10.8449	12.4017
VIT_19s0093g00190	0.425817	11.6898	5.71406	4.55663	5.43729	12.3543
VIT_12s0028g01180	-5.05889	13.5456	8.19139	7.06605	12.0834	12.225
VIT_07s0005g03420	-2.25154	14.5735	8.2656	10.4351	12.9661	12.1875
VIT_18s0001g00360	10.0564	11.4209	12.2106	10.9817	11.8365	12.1363
VIT_06s0061g00550	2.49057	11.3249	10.6759	5.30719	8.65265	12.0988
VIT_07s0151g00640	1.05195	13.6004	11.2336	7.84766	13.0048	12.0522
VIT_18s0072g00380	11.5102	11.3117	12.7756	12.2994	12.487	11.9789
VIT_09s0018g01490	0.337235	10.9568	11.603	5.71626	9.28603	11.9765
VIT_02s0033g01330	10.1626	11.4984	12.0769	10.1904	11.3366	11.9551
VIT_16s0022g00960	8.78691	11.1435	10.3354	9.11536	9.1901	11.9351
VIT_14s0108g00810	11.1119	11.2298	11.7638	10.2884	11.2746	11.8893
VIT_05s0136g00260	10.2074	11.3688	11.5169	9.26665	11.2241	11.7969
VIT_19s0177g00090	-2.20645	14.0622	5.74066	11.0451	12.9742	11.5958
VIT_07s0005g03410	-3.09954	14.2803	7.43176	9.63683	12.6379	11.5197
VIT_17s0000g09780	9.4359	10.5119	11.4636	9.20823	10.5698	11.429
VIT_08s0040g00470	10.5968	10.3905	11.4431	10.3241	11.1484	11.3851
VIT_14s0128g00200	-5.22882	13.4972	10.1598	6.28145	12.3684	11.3349
VIT_18s0001g09400	10.0818	10.9082	10.5419	8.41557	10.1398	11.3258
VIT_12s0059g00490	-3.37084	9.77858	11.2352	5.12212	8.5523	11.2995
VIT_06s0004g04510	10.1958	11.1862	10.5003	10.1322	10.7934	11.2396
VIT_04s0044g00020	10.4342	10.4798	11.4757	11.1067	11.4729	11.1958
VIT_19s0015g02880	6.98235	10.8859	9.80258	7.26647	10.0544	11.1571
VIT_03s0063g02610	11.5708	10.585	11.8243	11.5513	10.7427	11.1567
VIT_19s0014g02740	8.00807	11.2115	11.2455	9.2485	11.2676	11.1436
VIT_14s0066g00700	1.23675	12.0379	10.0507	10.8411	11.2308	11.1257
VIT_01s0010g02460	5.31288	10.089	11.3423	7.15967	8.40596	11.1187
VIT_12s0059g01060	7.804	9.70366	10.3511	8.56163	9.49107	10.9992
VIT_13s0019g04280	10.1767	10.431	11.0766	9.50125	11.2655	10.9744
VIT_13s0067g02930	5.38198	9.05217	10.2717	5.46967	9.47021	10.964
VIT_02s0025g04580	8.07879	10.2787	10.8461	8.32814	10.4806	10.9197
VIT_04s0023g00600	8.17293	10.0998	10.6309	8.07829	10.5563	10.9099
VIT_18s0001g13250	10.3127	10.8136	11.2276	10.1858	11.2475	10.8747
VIT_19s0015g02680	-2.22882	10.2808	4.13805	2.89401	3.99518	10.8571
VIT_02s0025g01050	10.7826	10.9576	9.96198	10.5166	10.1709	10.7555
VIT_10s0003g02510	-1	9.72345	9.42959	3.66676	6.34997	10.7428
VIT_11s0016g04920	3.81967	10.748	10.914	6.8968	6.64563	10.7019
VIT_02s0033g01120	8.76857	9.70812	10.6505	8.46934	10.5035	10.6959
VIT_04s0008g05010	11.2306	10.0397	10.9204	10.6341	12.1223	10.658
VIT_01s0146g00260	7.19571	10.5981	10.4624	7.26766	10.6666	10.6574
VIT_02s0025g04720	10.04	10.3383	10.3984	8.51271	10.2706	10.5858
VIT_13s0019g01430	10.1027	9.86078	10.4499	9.47037	9.82505	10.5799
VIT_03s0088g00380	11.3553	10.1876	9.87715	10.1878	10.0758	10.5759
VIT_08s0007g08310	8.27905	10.1783	10.5051	8.17868	10.3394	10.4924
VIT_01s0010g03750	8.62626	9.8973	10.4529	8.22387	9.9466	10.4905
VIT_15s0046g03180	9.15492	9.02328	10.2906	9.1179	10.1556	10.4802
VIT_18s0001g03430	8.92135	10.6024	10.97	8.92379	10.4321	10.4022
VIT_15s0046g02110	9.49873	8.7756	10.3695	8.99948	9.76263	10.3815
VIT_03s0180g00070	11.3105	10.5788	10.1848	11.8545	11.3521	10.3486
VIT_11s0118g00370	-2.07907	9.4164	10.5873	4.50101	6.84377	10.3366
VIT_18s0001g01130	6.29309	8.77829	10.2043	6.91488	10.0512	10.3193
VIT_02s0025g01720	8.82861	10.1033	10.5729	8.51926	10.2911	10.3013
VIT_18s0122g00850	6.67878	9.58091	10.2078	6.90537	9.85481	10.2866
VIT_18s0001g12830	8.02752	9.41121	10.2336	7.94265	9.49324	10.2818
VIT_14s0066g01340	9.43637	9.75755	10.2329	9.24062	9.65528	10.2758
VIT_11s0016g02950	9.11452	10.1218	10.0856	9.03428	10.2122	10.2502
VIT_13s0064g01260	8.42881	9.13364	10.011	8.55009	9.95799	10.2218
VIT_12s0057g00190	7.82211	9.38136	9.63956	7.63159	7.3477	10.206
VIT_04s0008g03930	10.1877	9.37785	9.98822	9.98483	8.65958	10.1935
VIT_08s0056g00200	9.08326	9.60881	10.3761	9.13366	9.69906	10.187
VIT_04s0023g03370	9.7542	9.64737	9.62446	8.4098	9.14428	10.1778
VIT_18s0001g08060	6.72633	9.65528	9.83113	6.59186	9.32429	10.176
VIT_01s0010g03900	9.33608	9.6251	9.8837	9.29629	9.43514	10.1642
VIT_05s0029g00420	9.54935	9.50355	10.3849	9.48232	10.6952	10.1408
VIT_15s0046g01500	9.10331	9.77631	10.2519	9.04842	9.63857	10.1225
VIT_10s0003g02040	3.13532	11.0522	9.24972	5.54679	9.87716	10.1123
VIT_13s0067g02130	9.23144	9.06829	10.1755	9.76644	9.39436	10.1001
VIT_19s0090g01370	-3.52838	10.5419	8.58965	5.29793	10.2202	10.089
VIT_01s0011g00830	9.20327	8.82945	10.0023	8.56439	9.69962	10.0658
VIT_05s0020g00670	11.1054	9.67524	10.9652	10.9642	10.8955	10.0542
VIT_18s0001g07240	9.26744	9.50737	10.2599	9.21959	9.76662	10.0354
VIT_19s0177g00140	8.40474	9.56224	10.1447	9.80882	10.1287	10.0264
VIT_14s0030g00830	9.28834	9.70709	9.41377	8.83638	9.50162	9.98725
VIT_02s0033g00410	-0.79419	8.64892	9.04801	3.91073	8.0827	9.98164
VIT_06s0061g00410	8.86577	9.81969	9.5821	8.92335	9.45473	9.96607
VIT_03s0038g03850	-3.32193	10.6149	10.5201	6.93412	10.4181	9.915
VIT_18s0001g09990	8.27146	9.84381	10.1466	8.81731	9.6255	9.91432
VIT_04s0023g02700	9.83452	10.1128	8.79478	9.66738	9.17853	9.86435
VIT_04s0008g01610	-0.880091	10.9863	11.0212	5.87463	11.0682	9.84567
VIT_12s0057g01200	8.3544	9.36716	9.17379	8.4725	9.00106	9.82306
VIT_07s0005g03310	8.61449	9.63729	9.66854	9.02352	9.66247	9.81686
VIT_13s0067g02870	10.0427	9.85937	9.29425	8.78802	9.31404	9.81155
VIT_04s0044g01110	7.48328	9.2988	10.5857	8.25534	8.58427	9.79834
VIT_10s0003g04180	8.3692	9.11573	9.39663	8.05326	9.47949	9.79569
VIT_03s0038g02520	11.3961	10.4597	9.16372	11.3956	9.88565	9.78182
VIT_03s0063g01770	8.56927	8.48854	10.1929	8.87761	9.23105	9.77929
VIT_04s0008g00720	8.04367	9.42145	9.48181	8.93499	9.39695	9.73896
VIT_13s0019g02180	6.08044	8.87703	9.14595	6.54185	7.93324	9.72463
VIT_16s0013g00880	-1.03899	10.7792	7.45434	10.0996	9.80353	9.72383
VIT_03s0017g01350	8.73927	9.25319	9.71464	8.79147	9.41905	9.72165
VIT_04s0008g06000	1.90945	8.17523	9.49285	4.75293	9.15003	9.71872
VIT_08s0007g06430	-4.64386	11.9732	10.5888	6.47037	11.2489	9.71498
VIT_13s0064g00460	8.66321	8.38208	9.14234	8.02628	9.41891	9.69463
VIT_14s0060g00350	5.9769	8.3784	5.47227	3.52774	4.59236	9.62505
VIT_05s0020g04080	8.48501	9.26426	10.1499	8.89123	9.62068	9.61486
VIT_09s0002g00580	-3.22882	10.3628	8.4019	5.31155	10.2083	9.58198
VIT_02s0025g02800	9.16601	9.64551	10.3426	9.5961	9.81568	9.55391
VIT_17s0000g09000	-4.90689	10.6012	9.02368	8.16523	9.98673	9.54461
VIT_19s0090g00390	7.37565	8.89655	9.34445	7.64049	8.96638	9.52827
VIT_17s0000g00430	2.80941	8.39071	9.71462	5.29413	9.29163	9.52682
VIT_04s0069g00860	7.59684	8.94875	8.2976	6.70736	8.05835	9.5199
VIT_14s0030g01230	8.96393	9.41697	8.80825	8.51796	8.32824	9.50729
VIT_08s0058g01210	8.87612	7.86315	10.687	7.69053	8.3322	9.49771
VIT_01s0026g02620	6.82009	6.86769	9.61334	5.56458	8.65693	9.45162
VIT_14s0068g00920	9.0195	8.90364	8.03278	7.09694	7.25465	9.45017
VIT_07s0005g00750	6.68818	8.78278	9.86461	7.39283	8.48557	9.44936
VIT_07s0031g00050	8.82891	9.11009	10.3122	9.04094	9.9979	9.44884
VIT_04s0008g04480	6.15164	8.86751	8.76333	6.99111	8.75081	9.4097
VIT_14s0068g01760	5.36118	8.59192	10.0166	5.4726	8.29275	9.3922
VIT_06s0004g02620	9.3703	9.15063	8.53181	8.06804	8.30911	9.38455
VIT_14s0030g02180	10.3108	9.04477	8.96804	8.83029	9.25072	9.37819
VIT_02s0025g01320	7.2588	8.62337	9.97363	7.59233	9.21347	9.35617
VIT_17s0000g06370	5.84741	8.29774	8.80974	6.78053	8.35241	9.34184
VIT_04s0079g00530	8.57622	8.84169	9.43137	8.61901	9.25856	9.33357
VIT_18s0001g15450	7.79766	9.15874	8.71429	7.83843	8.69921	9.32712
VIT_01s0011g03480	1.80598	8.35987	8.74666	4.28293	8.75966	9.29639
VIT_05s0020g00600	-1.06895	10.9008	9.62419	6.38434	10.0256	9.29055
VIT_05s0020g02770	7.54205	8.70465	10.2922	8.78764	8.6755	9.2879
VIT_01s0011g04140	8.67553	8.8958	9.55108	8.43759	8.70337	9.27527
VIT_05s0049g00980	7.90069	8.99761	9.21444	8.34407	9.12184	9.26513
VIT_05s0029g00330	10.3886	8.61148	9.70741	10.5985	9.48722	9.25456
VIT_13s0019g03920	8.40543	8.9776	9.61192	8.83937	9.52925	9.24796
VIT_16s0050g00910	1.74129	8.3364	8.45149	4.8641	7.87299	9.24498
VIT_16s0098g00860	0.422233	7.07721	7.00229	1.95853	3.57652	9.22975
VIT_05s0051g00590	7.06044	8.5465	8.40766	4.9814	8.39722	9.22926
VIT_01s0011g02200	7.95762	8.6992	8.82111	7.95706	9.09048	9.21523
VIT_02s0087g00160	8.58459	9.02844	9.35895	8.71684	8.86982	9.17972
VIT_15s0046g01560	8.21353	9.68928	9.4647	9.42873	9.52424	9.16979
VIT_06s0004g05650	4.95513	6.86088	8.22774	6.40628	7.39134	9.16121
VIT_16s0022g01770	7.58796	8.70389	9.32307	8.17118	7.27532	9.13424
VIT_07s0005g02820	8.23372	8.9392	9.44924	8.60527	9.2299	9.09728
VIT_08s0007g07290	8.30214	9.21839	9.17769	8.86286	8.9815	9.09386
VIT_08s0040g00980	9.49502	7.9611	8.05575	8.7817	8.06781	9.08028
VIT_13s0019g05120	-1.88897	9.65709	10.4661	7.52969	9.40624	9.06845
VIT_07s0031g01530	6.6777	8.9027	7.94969	7.12698	7.47903	9.06172
VIT_05s0077g00170	8.38972	8.72805	8.33954	7.77056	8.58916	9.06086
VIT_12s0028g03310	7.66936	7.67356	9.08599	7.62841	8.45401	9.05501
VIT_13s0084g00050	7.61603	8.99492	8.6045	7.93811	8.36979	9.04299
VIT_05s0062g00810	-1	10.3625	9.78217	6.31705	10.3371	9.03995
VIT_03s0038g00790	8.46318	8.675	8.9994	8.17689	8.74197	9.03472
VIT_04s0044g00210	2.13093	9.4731	9.07486	6.86476	9.62953	9.03098
VIT_08s0040g01940	6.66311	8.46903	9.38675	7.25553	8.52258	9.03081
VIT_04s0079g00600	9.0689	8.26533	9.5305	9.16817	9.61708	9.0263
VIT_16s0039g02230	1.05427	8.09819	9.14823	3.71149	8.23866	9.02299
VIT_14s0060g01720	10.0215	10.1604	7.72565	10.2375	8.66951	9.0088
VIT_08s0007g01470	7.50917	8.77945	8.06751	6.61397	7.67447	9.00828
VIT_13s0074g00770	7.88058	8.8825	9.50814	8.57108	9.25546	9.00634
VIT_16s0098g00790	8.9351	8.2144	7.74304	8.45113	6.30725	8.99852
VIT_07s0104g00540	9.87607	9.6446	8.76928	10.2434	9.53282	8.99681
VIT_08s0040g01190	6.38928	8.35504	8.77643	6.69674	7.71896	8.99344
VIT_13s0019g02200	6.69032	8.7874	8.87768	7.24951	7.89122	8.96799
VIT_17s0000g03720	7.56839	8.52161	9.21096	8.91706	8.7016	8.95963
VIT_04s0069g01180	6.58661	8.4437	9.60081	6.50298	9.38755	8.94391
VIT_13s0156g00120	7.89059	8.63755	8.4851	7.82498	8.37662	8.93436
VIT_11s0016g03950	-3.47393	9.65087	9.86307	4.14676	9.06906	8.91533
VIT_01s0026g00620	-1.09954	10.0105	10.2186	4.93467	9.27878	8.9122
VIT_07s0104g01800	8.35212	8.38248	8.13612	7.85506	8.16695	8.90237
VIT_01s0011g02710	8.47408	9.34611	7.29563	9.6254	8.89011	8.90062
VIT_17s0000g00340	7.78934	8.36216	8.81361	8.21642	8.46558	8.87971
VIT_02s0033g01070	-0.845114	7.48875	8.20755	2.36457	6.14595	8.87576
VIT_05s0020g04850	5.78625	8.47215	7.76027	6.18097	7.31013	8.87463
VIT_01s0011g03690	7.78335	8.84804	9.04795	7.95501	8.11939	8.873
VIT_17s0000g01930	4.4895	7.8949	8.25388	4.3512	8.10723	8.87189
VIT_16s0039g00220	-3.47393	10.0393	8.58079	6.38945	9.62017	8.86698
VIT_04s0023g02050	7.65423	8.3989	9.03195	7.8166	9.02652	8.86141
VIT_08s0007g04760	8.32659	9.09262	8.34583	8.50959	8.51773	8.86075
VIT_15s0046g02370	7.78394	8.39612	8.95175	7.95542	8.60526	8.84759
VIT_06s0004g04660	6.14608	8.91107	10.1643	8.10383	9.65436	8.84417
VIT_06s0004g06880	7.9932	8.65765	8.99969	8.16382	9.15449	8.83427
VIT_18s0001g12800	7.79796	8.68139	8.19838	6.99405	8.33875	8.83281
VIT_06s0061g01120	8.70386	8.46336	9.58828	8.06293	9.6116	8.81009
VIT_17s0000g09810	3.30937	7.05083	7.96642	3.54844	6.19272	8.80415
VIT_10s0003g03190	5.615	8.52832	8.40236	6.27984	8.29358	8.78829
VIT_05s0020g04570	5.7169	8.81213	7.99065	5.94291	8.52534	8.78315
VIT_12s0034g01970	5.26454	8.19159	7.31086	5.69988	6.8537	8.77866
VIT_18s0001g11930	5.10364	8.06817	9.39421	6.7623	9.28225	8.77852
VIT_03s0063g01290	-3.52838	6.69056	13.4141	6.77645	9.44581	8.76531
VIT_05s0077g00950	8.11225	8.57704	8.93012	7.34053	7.88594	8.75987
VIT_02s0025g03600	6.83137	8.33451	8.86796	6.82129	8.32301	8.74574
VIT_03s0038g04390	-1	9.83946	8.88043	4.25802	9.15553	8.74376
VIT_14s0060g00360	5.18587	7.88757	7.8135	5.41886	8.02226	8.74082
VIT_08s0007g01430	7.69901	8.64057	8.85515	7.08686	8.46201	8.73978
VIT_12s0028g02440	5.21075	8.30526	8.45878	5.37376	8.14173	8.7381
VIT_02s0025g04350	8.12615	7.67622	8.45333	7.63076	8.36868	8.72788
VIT_05s0029g00240	7.0825	8.18743	8.52172	8.24152	8.22686	8.7116
VIT_08s0007g06040	0.793549	7.79051	9.71743	3.64847	5.62722	8.70895
VIT_19s0090g00420	9.04058	9.5433	9.99202	9.26585	9.94111	8.70438
VIT_04s0023g03170	7.62641	8.08327	8.9118	6.959	9.24499	8.70104
VIT_13s0067g03820	8.63392	8.22984	9.19745	7.73396	8.42568	8.69616
VIT_13s0019g00840	8.78668	8.05969	9.23466	8.3312	8.49388	8.68675
VIT_05s0062g01320	10.9206	9.17463	8.73059	10.4183	9.33805	8.6659
VIT_18s0001g14310	7.51096	9.56929	8.63055	7.00116	9.24222	8.65112
VIT_02s0234g00110	0.59773	9.44712	9.1427	8.06318	9.37369	8.63922
VIT_18s0001g10360	6.89207	8.32169	9.17193	6.43668	8.91885	8.63813
VIT_01s0011g00690	9.83045	8.49503	8.88353	8.66532	9.27941	8.63618
VIT_13s0019g04460	4.59793	7.76653	7.85891	5.63971	6.38767	8.63396
VIT_11s0118g00200	6.28263	8.14865	8.76452	7.00794	8.62449	8.62523
VIT_18s0001g00810	8.17443	8.35887	8.26031	7.23052	8.36893	8.61701
VIT_09s0002g00130	7.85404	8.11313	8.86144	7.72067	8.64921	8.60845
VIT_06s0004g05730	7.46186	8.13982	7.6843	5.82587	7.12595	8.60167
VIT_17s0000g07510	7.26969	8.04552	8.54967	7.42917	7.9541	8.59974
VIT_13s0067g01980	5.73164	9.33662	8.73409	7.09237	9.64722	8.58848
VIT_12s0178g00200	7.58268	8.08889	8.38685	7.24707	7.88945	8.58322
VIT_07s0005g02990	7.62846	8.38382	8.23817	7.58118	8.04578	8.58128
VIT_03s0038g04100	6.3194	7.85958	9.05604	4.94533	6.5695	8.57744
VIT_02s0033g00450	-1.87127	7.56346	8.02375	2.47249	6.93833	8.57742
VIT_16s0098g01200	7.291	8.1675	8.27687	7.37874	7.92641	8.57611
VIT_19s0014g02640	7.61198	8.4159	8.37471	7.6527	8.21999	8.56848
VIT_03s0063g02030	7.53385	8.39723	8.03265	7.91986	8.17567	8.5635
VIT_03s0038g00760	8.27001	8.19201	8.88827	7.41951	8.84651	8.55513
VIT_03s0038g04750	6.73656	7.99307	9.04416	7.32499	8.17333	8.55389
VIT_16s0100g00220	5.87529	7.67582	7.2202	6.58356	6.48053	8.55171
VIT_05s0049g01780	-1.85378	9.57479	8.01571	6.33783	8.95933	8.55104
VIT_07s0005g01710	5.11214	7.48024	8.3994	6.0808	7.90705	8.53675
VIT_08s0056g00710	7.85643	8.15375	7.94609	7.30706	7.90398	8.53386
VIT_18s0122g01440	4.53875	8.07425	8.54209	4.94017	7.2817	8.53345
VIT_17s0000g05110	10.3536	8.98971	5.67713	10.7272	6.94118	8.52536
VIT_18s0001g07090	7.36057	8.4469	8.79541	6.46875	8.50164	8.52123
VIT_03s0038g04470	8.94212	8.76115	7.59947	8.72269	8.05313	8.52055
VIT_04s0008g01490	4.78293	7.91055	7.19577	5.18415	8.60659	8.50647
VIT_17s0000g08670	7.50716	8.91753	7.80075	7.52351	8.25282	8.50475
VIT_19s0090g01470	8.22697	7.57833	8.07486	7.29536	8.43264	8.48815
VIT_01s0011g05370	9.09474	8.12858	7.84716	8.28378	7.97867	8.47986
VIT_10s0003g01070	2.89207	8.77451	10.1872	5.59006	9.83856	8.46888
VIT_07s0031g02200	7.40656	7.91536	7.41411	6.86448	6.55786	8.46386
VIT_14s0060g01490	7.11517	8.47675	7.91201	7.44286	7.88372	8.45413
VIT_05s0020g02340	7.42069	7.93868	8.62683	7.47392	8.05146	8.44163
VIT_03s0088g00060	1.71076	6.78236	5.17991	-0.0740006	2.04381	8.44068
VIT_06s0004g07940	8.1028	8.07043	8.9862	8.23108	8.75706	8.42816
VIT_04s0008g00650	7.47168	8.11437	8.48083	7.68524	8.60715	8.40813
VIT_16s0098g01230	7.87776	8.27449	7.5112	7.41388	7.21406	8.40813
VIT_19s0014g01710	7.30536	6.51654	8.33377	6.89922	7.85972	8.40283
VIT_05s0077g02140	7.52628	8.43141	8.17326	7.98823	8.37012	8.39957
VIT_18s0122g00500	7.59828	7.95724	8.37678	7.31539	8.20162	8.39453
VIT_06s0004g01510	7.85528	8.30104	6.00023	7.64818	7.62566	8.38434
VIT_08s0007g00130	7.37228	8.75757	7.84706	7.16682	8.24922	8.38125
VIT_18s0001g08270	5.85757	7.17739	5.5222	6.046	5.47735	8.36667
VIT_03s0038g03570	5.77259	7.1336	9.39777	4.54164	8.74377	8.36603
VIT_14s0060g02140	6.97036	7.84578	8.14785	6.45193	7.85939	8.35685
VIT_08s0007g08330	-5.64386	7.78736	7.88468	2.85798	7.37051	8.35481
VIT_18s0117g00130	6.97143	7.97665	8.7985	7.46342	8.37053	8.34805
VIT_13s0019g03650	5.25915	8.52666	7.73096	6.22734	7.85726	8.34617
VIT_05s0136g00290	9.35589	8.55878	7.91962	8.57073	7.96023	8.34215
VIT_08s0040g01890	8.32957	8.2782	6.01889	7.93227	6.71374	8.33387
VIT_11s0206g00120	7.74034	8.37531	8.77503	7.63629	8.2726	8.32447
VIT_11s0016g03720	7.12436	7.79829	8.58752	8.37696	7.83998	8.32164
VIT_04s0044g01130	6.08201	7.7612	9.47708	7.21723	7.44173	8.31982
VIT_12s0028g00930	6.54401	8.02989	8.07343	6.86216	7.58559	8.30232
VIT_06s0080g01230	7.63694	8.50816	8.56131	7.62252	8.62984	8.30076
VIT_18s0001g13370	7.5951	8.01735	8.47284	7.64092	7.95637	8.29887
VIT_19s0014g03130	5.19167	7.56565	9.66371	7.26516	8.43563	8.29736
VIT_10s0071g00810	6.58896	7.78285	8.19939	7.0383	7.49668	8.29099
VIT_13s0067g00660	5.22265	7.1111	8.46655	5.7523	7.61498	8.28811
VIT_19s0138g00140	6.49292	6.93589	7.80452	6.45033	7.30746	8.27431
VIT_01s0244g00010	5.95644	8.09643	8.0872	6.86732	8.20403	8.27235
VIT_05s0029g00310	9.34455	7.68767	8.27	9.45638	8.2838	8.27199
VIT_18s0001g05690	2.9152	8.02663	8.42519	4.72919	8.5625	8.26986
VIT_18s0001g11260	6.4266	7.56301	7.76984	6.66595	7.34958	8.2641
VIT_04s0008g05220	9.4434	8.32274	8.20333	9.04309	8.6117	8.25998
VIT_18s0001g12240	7.71285	7.72517	8.74607	7.60053	7.87695	8.25732
VIT_04s0023g01110	-2.37084	6.97093	7.42529	2.46902	5.80821	8.25718
VIT_06s0004g04470	5.08094	8.71701	8.64524	6.14602	8.56223	8.256
VIT_08s0056g01570	9.86143	7.93589	8.42554	9.49338	8.55699	8.24982
VIT_16s0013g00620	6.307	7.59828	8.62956	6.97907	8.65415	8.24962
VIT_10s0003g03510	6.90219	8.23066	8.32427	7.00255	8.43097	8.24543
VIT_14s0083g00320	5.84071	7.24546	7.68098	6.59131	6.91385	8.24528
VIT_18s0001g05800	7.71498	7.91552	8.58008	7.40315	8.57294	8.23173
VIT_11s0016g03210	7.57559	8.08403	8.49844	7.60553	8.58783	8.23008
VIT_08s0040g02660	7.6966	9.72269	7.5817	7.82403	9.04813	8.2245
VIT_17s0000g09870	7.30931	7.3618	7.72288	7.37255	7.31188	8.20509
VIT_11s0016g01440	7.73931	8.04703	8.74368	7.76481	8.56723	8.20376
VIT_08s0217g00030	7.40253	7.5529	8.53006	7.28438	7.90757	8.20147
VIT_18s0001g09290	6.49164	8.02348	8.02337	6.55934	7.59937	8.20095
VIT_11s0037g00510	1.79909	9.59903	9.34413	5.73525	9.51764	8.19622
VIT_07s0005g02230	9.5547	7.80759	7.7389	10.0636	7.60494	8.19554
VIT_15s0046g01930	7.86179	8.13514	8.26399	7.50099	8.41865	8.18964
VIT_08s0007g04170	7.49684	7.33724	8.33335	7.34024	7.45763	8.18105
VIT_08s0040g02280	7.11808	7.30055	7.99283	6.53642	7.54517	8.17963
VIT_11s0016g02760	6.37051	7.49097	8.19214	4.65954	7.93599	8.17893
VIT_07s0005g03360	8.90482	7.81688	7.53351	8.12999	7.69321	8.17737
VIT_10s0003g00090	10.5474	8.58041	8.31231	11.0475	7.738	8.17606
VIT_06s0009g02830	5.10434	7.19285	5.16859	5.55868	4.12736	8.17184
VIT_07s0031g02390	6.2414	7.42842	8.56406	5.60476	8.28317	8.17133
VIT_05s0049g00210	7.56778	7.04279	7.88785	7.27526	7.86672	8.16964
VIT_14s0060g02260	7.49737	8.02004	8.55727	7.91785	8.22312	8.16474
VIT_12s0057g01210	7.09036	7.76955	8.0795	7.35899	8.0797	8.15805
VIT_03s0038g02280	6.55059	7.5089	8.22064	7.06142	7.82993	8.15588
VIT_16s0050g00140	7.48218	7.89033	7.12509	6.79003	7.00772	8.15411
VIT_08s0007g06450	7.92896	7.67243	7.14636	7.91783	7.54677	8.15352
VIT_04s0023g02450	6.7703	7.67847	7.59148	6.30287	6.93782	8.14586
VIT_13s0067g00700	5.30682	6.87697	8.06268	5.00779	7.36842	8.1451
VIT_08s0007g06440	-1	9.51327	8.79649	3.71663	8.90972	8.1395
VIT_09s0002g00570	9.22267	6.85474	8.06557	8.27561	7.40982	8.13803
VIT_10s0003g00260	4.95078	8.87267	8.26896	5.63217	8.24573	8.13403
VIT_13s0019g00330	6.63706	8.05485	7.70586	7.62488	8.80637	8.12739
VIT_09s0002g05160	7.34382	6.72583	7.25632	6.82757	6.6062	8.12433
VIT_08s0040g00770	7.55295	7.9515	8.68141	8.09168	8.26432	8.11828
VIT_04s0008g02740	7.13343	6.71845	8.04113	6.80748	7.68958	8.11444
VIT_04s0008g07020	5.72073	7.74663	7.77347	6.24159	7.20255	8.11254
VIT_07s0191g00090	8.95273	8.09432	7.63406	8.66148	7.67737	8.11228
VIT_03s0038g01380	6.70109	7.54246	8.08114	7.06156	6.99741	8.11187
VIT_02s0012g00500	3.93734	7.05557	5.87889	2.98307	5.38221	8.10783
VIT_06s0004g01250	6.41892	9.41493	5.68846	6.94743	8.02013	8.10075
VIT_13s0101g00220	10.0786	8.65996	8.32466	10.6222	9.57242	8.09908
VIT_10s0003g00990	7.28824	8.08202	8.20729	7.28725	7.44653	8.09794
VIT_11s0016g02720	7.02879	7.66664	7.99437	7.06178	7.87983	8.0873
VIT_04s0008g05030	7.00918	7.68589	8.41191	7.04545	7.84518	8.07644
VIT_18s0001g08250	10.4652	7.61139	7.80585	9.24502	8.04898	8.06266
VIT_06s0004g04930	6.95749	7.6991	8.0337	6.9533	7.99823	8.06134
VIT_13s0019g02330	9.11068	8.58461	7.32844	8.84449	8.03203	8.05794
VIT_13s0064g00840	5.72674	7.73329	8.38832	6.87295	8.62917	8.05445
VIT_14s0171g00510	6.93298	7.22532	7.84013	6.72151	7.35144	8.05059
VIT_07s0129g00490	8.03689	8.0042	6.38238	6.36335	6.95656	8.04949
VIT_05s0049g02240	2.95047	9.97276	8.0501	4.57894	9.25468	8.03175
VIT_01s0146g00280	6.59101	7.04272	7.26235	6.57445	6.52388	8.03168
VIT_14s0068g00850	7.02174	6.76642	7.79643	6.86493	7.18913	8.03107
VIT_16s0050g00850	7.16805	6.72456	8.12994	7.5102	7.97831	8.02606
VIT_08s0007g08050	5.88663	7.52199	7.43374	6.18461	6.62697	8.02435
VIT_14s0006g02880	5.02901	7.02348	8.24565	5.11977	6.86381	8.02344
VIT_11s0052g01230	-0.0689474	9.66267	3.95884	4.21179	8.28421	8.02085
VIT_05s0051g00850	7.02805	7.62739	7.66685	6.95873	7.13658	8.0137
VIT_01s0150g00160	7.34991	7.3036	8.0089	7.13408	7.76478	8.01123
VIT_04s0008g05240	8.27925	8.24111	6.81865	7.86598	7.462	8.01011
VIT_19s0090g01360	4.70377	8.35407	6.28663	4.62975	6.9639	8.00921
VIT_01s0010g00950	7.27572	5.98406	7.85395	6.68398	7.53037	8.00804
VIT_13s0067g02990	7.31603	7.58338	9.23321	8.56834	8.8684	8.00761
VIT_02s0025g01380	7.4814	6.53838	7.55804	7.38578	7.7645	8.00152
VIT_14s0108g00760	6.69014	7.45719	7.56725	7.6985	7.37816	7.99381
VIT_15s0046g01510	6.44372	7.39552	8.2321	6.63193	7.19525	7.99298
VIT_19s0027g00200	9.18402	8.61243	7.62232	10.3318	9.61995	7.99186
VIT_10s0116g00570	5.5655	8.22951	5.91313	6.21173	6.6126	7.98982
VIT_16s0022g01440	6.72301	7.02248	7.79184	7.22654	6.89591	7.98766
VIT_03s0063g00810	7.46856	7.7527	6.81237	7.11846	7.0803	7.98609
VIT_18s0001g06250	8.16755	7.45146	8.29237	8.65295	7.44015	7.98394
VIT_17s0000g02260	6.49127	7.72278	7.88287	7.82598	7.82256	7.98096
VIT_03s0017g01980	7.01059	7.73059	8.22362	7.37318	7.88559	7.98054
VIT_02s0033g01160	7.011	7.59271	8.21184	7.43968	7.89043	7.96963
VIT_09s0002g03450	6.44366	7.56656	8.62931	7.60521	7.9987	7.95735
VIT_14s0006g02820	7.24022	7.68678	8.84945	7.17353	8.39793	7.95706
VIT_19s0014g03290	6.37707	6.92053	7.71534	6.57001	7.88905	7.94199
VIT_08s0058g00440	-0.952694	7.32547	8.26611	1.61824	5.3421	7.93536
VIT_17s0000g06380	6.0003	7.78453	7.95214	6.72037	7.47511	7.93515
VIT_01s0146g00420	5.04861	9.09593	5.50197	5.40815	7.04959	7.92888
VIT_08s0058g00430	0.499102	7.28133	8.50687	2.91009	5.41504	7.9276
VIT_03s0038g02440	8.48076	8.15176	8.51956	9.45041	9.04637	7.9275
VIT_18s0001g10150	4.79042	7.63737	8.1292	6.48768	8.05909	7.92564
VIT_16s0100g00270	3.6603	7.84906	7.0864	4.51454	7.21001	7.92017
VIT_18s0001g09080	7.7423	7.94998	8.43353	8.17868	8.19854	7.91321
VIT_01s0011g01160	4.97774	6.97419	8.35971	5.39106	6.63203	7.91083
VIT_02s0154g00390	7.20454	7.44281	7.49108	6.80971	7.33854	7.89783
VIT_06s0004g04460	6.47487	7.07171	7.93349	6.54797	7.0391	7.89649
VIT_09s0002g03620	8.26597	8.47041	6.68832	7.78444	6.93891	7.89625
VIT_03s0091g00700	6.74927	7.46967	7.78455	6.86369	7.25068	7.89415
VIT_18s0001g12000	6.53662	6.84243	8.35985	6.83141	7.3495	7.8911
VIT_06s0004g01910	8.91137	7.79926	7.46418	8.26379	7.80609	7.88224
VIT_03s0063g01870	6.48634	7.5353	8.00884	7.42526	8.44777	7.87293
VIT_14s0060g00480	9.47155	7.04778	7.37981	9.21494	7.90585	7.86489
VIT_03s0180g00010	7.49428	7.14893	8.18049	7.16132	7.61794	7.86063
VIT_03s0063g02640	5.42559	6.84193	7.04901	5.22509	7.19088	7.85786
VIT_16s0013g02020	7.91727	8.12216	7.16728	7.48977	7.54448	7.85705
VIT_18s0072g00670	4.99292	7.57168	7.9601	5.34282	7.48053	7.84952
VIT_08s0007g08010	5.95582	7.8179	7.56661	5.05904	7.34308	7.84472
VIT_04s0008g01380	6.4441	6.81267	8.05781	5.75995	7.23272	7.83649
VIT_13s0064g00810	5.46031	7.67278	8.3899	6.81946	8.59695	7.83137
VIT_08s0007g03870	8.8135	7.34687	6.63624	6.97621	6.02658	7.82828
VIT_01s0011g03330	5.58356	7.77659	8.55587	5.27736	7.69625	7.81617
VIT_06s0004g07770	4.04527	7.41004	1.38957	1.85997	2.47508	7.80763
VIT_04s0008g02920	10.4944	8.58386	7.24022	9.71095	7.81553	7.8071
VIT_17s0000g02800	4.90368	7.33062	8.01249	5.57924	7.60558	7.80349
VIT_01s0026g00920	7.07973	7.87162	7.23885	7.2778	7.71216	7.79539
VIT_06s0009g02020	9.49304	7.59711	7.36673	8.88603	7.89817	7.79422
VIT_04s0008g00700	9.4234	8.47377	8.06089	8.30632	8.34988	7.79409
VIT_14s0068g00640	6.80808	7.25971	7.24279	6.30737	6.95873	7.79147
VIT_08s0058g00410	-0.162729	7.04869	8.26455	2.79355	5.22123	7.79136
VIT_19s0090g01000	12.1826	9.07068	7.14778	11.7777	8.35949	7.78579
VIT_09s0002g00340	6.44145	7.20705	7.83815	7.19633	7.49783	7.77112
VIT_13s0067g02640	6.1893	7.76902	7.39097	6.91676	7.7033	7.76982
VIT_05s0102g01180	7.10814	6.9833	7.4245	6.95105	7.22326	7.76825
VIT_05s0062g01190	4.95946	6.87188	7.53931	5.16323	6.40837	7.7588
VIT_07s0031g00540	9.04503	7.80884	7.61125	7.94519	8.39576	7.75589
VIT_19s0014g03190	10.3521	7.72349	7.39769	9.38103	7.58799	7.7496
VIT_08s0007g08860	6.33402	7.36656	7.42948	6.34761	7.15218	7.7496
VIT_02s0025g00710	6.60777	7.64938	7.8169	6.68585	7.82814	7.74452
VIT_10s0071g01060	5.76871	7.17759	8.25213	6.11887	6.69209	7.74205
VIT_01s0010g00990	7.28287	8.29071	7.77041	7.19472	8.08444	7.73827
VIT_12s0059g01240	5.42122	7.18729	7.68014	6.82579	7.93829	7.73642
VIT_01s0011g03420	7.09096	6.79151	7.99405	6.50811	7.66323	7.73518
VIT_16s0115g00170	-1	8.94537	8.18615	3.6523	8.01688	7.72978
VIT_13s0067g01840	7.57155	6.87979	7.93288	7.41777	7.34737	7.72967
VIT_08s0007g04800	6.26847	7.91664	6.39077	3.6477	6.27811	7.72878
VIT_15s0021g00220	5.804	7.37472	6.70321	5.63062	6.67172	7.72538
VIT_05s0020g03180	8.98416	8.36327	7.41137	9.77342	8.68443	7.71964
VIT_14s0068g02060	7.2062	7.38048	7.23039	6.80107	7.29336	7.70143
VIT_07s0191g00080	7.24777	7.6725	5.66609	5.86551	5.71927	7.68897
VIT_05s0051g00010	5.41041	6.31753	6.70104	5.03709	6.09459	7.68501
VIT_01s0011g05230	7.68725	8.1327	7.03232	7.86944	7.79203	7.68419
VIT_18s0041g00730	6.56066	6.94665	8.04339	6.81096	7.0167	7.68229
VIT_05s0020g04110	6.41752	7.06419	7.45779	5.52711	6.01242	7.67774
VIT_03s0038g01930	6.82536	6.92643	7.85256	6.95505	7.1914	7.67268
VIT_09s0002g03690	4.80959	6.54581	6.11305	4.75898	5.89861	7.66315
VIT_08s0007g01030	5.60486	7.09645	7.71909	5.99398	7.43968	7.66164
VIT_08s0007g08280	4.06867	7.59569	7.27894	5.53719	7.17592	7.65053
VIT_07s0005g00670	6.5061	7.25374	7.69639	6.78525	7.38511	7.64945
VIT_04s0008g05990	6.97655	6.5042	7.8014	6.96625	7.6825	7.64487
VIT_06s0004g05460	5.19522	7.89579	7.37637	4.8334	6.76469	7.64369
VIT_06s0009g03010	4.54761	6.60461	4.54473	5.10615	3.7761	7.64068
VIT_05s0051g00870	6.28466	7.37602	7.96286	6.50404	7.65499	7.63952
VIT_10s0003g00020	-1	8.94264	8.08231	4.41549	8.382	7.63776
VIT_08s0007g04520	6.87578	7.04756	7.60807	6.63013	6.88647	7.63529
VIT_08s0040g02470	8.54316	7.49673	7.27864	8.11369	7.54471	7.63033
VIT_14s0066g01850	7.37707	7.97428	8.80845	7.01246	9.08464	7.62846
VIT_08s0217g00100	6.25827	7.11711	8.80975	6.77342	7.31949	7.62637
VIT_01s0010g01840	2.86856	8.07477	6.93456	4.10154	7.76062	7.62078
VIT_08s0040g01820	4.25248	8.58911	7.04589	5.7251	7.42464	7.61998
VIT_10s0003g05320	8.30632	6.78642	7.39698	7.52071	7.02842	7.60454
VIT_08s0007g04240	-1	8.8503	8.46845	4.43896	8.8015	7.59803
VIT_06s0004g03910	2.4794	6.78153	7.04213	4.65631	6.8163	7.59582
VIT_06s0004g03260	-6.64386	9.52976	7.17898	6.33426	8.38972	7.59151
VIT_08s0040g01170	4.73913	7.21681	7.01889	4.54885	6.75074	7.58879
VIT_03s0180g00200	7.03478	7.16685	9.28867	7.83735	8.22196	7.58747
VIT_06s0061g00440	7.47779	6.82528	8.09996	6.75982	7.01996	7.58386
VIT_08s0040g00010	7.18239	7.36294	7.97407	6.32211	8.04385	7.582
VIT_14s0060g00900	9.17505	8.24774	8.58322	8.83824	7.59325	7.5814
VIT_08s0007g04570	4.39985	5.70321	6.68944	4.44449	5.88891	7.57728
VIT_11s0149g00240	6.89889	7.52089	7.75936	7.39643	7.32841	7.57556
VIT_05s0077g01220	7.89666	7.44175	7.94546	8.63297	8.29123	7.57208
VIT_07s0031g00190	5.24729	6.98679	7.17792	5.30719	6.54107	7.57185
VIT_16s0098g01290	8.43746	6.9166	7.61412	7.70924	7.81181	7.57102
VIT_11s0016g05770	5.48328	7.84818	8.12474	6.02148	7.79487	7.56879
VIT_03s0038g00860	6.063	6.98463	7.85069	6.36376	7.41103	7.56656
VIT_18s0001g04160	7.05799	8.01158	7.70153	7.03555	7.78797	7.5657
VIT_05s0051g00720	6.34228	7.47403	7.9031	7.40185	7.74331	7.56451
VIT_08s0007g07120	6.42839	6.10608	7.60046	7.28627	6.67238	7.56285
VIT_14s0030g01720	7.27795	7.53424	8.23648	7.84065	8.11411	7.56227
VIT_19s0014g01520	6.47746	7.22818	7.54478	6.8997	7.13566	7.56166
VIT_18s0041g01880	10.7442	8.83351	5.75168	9.35434	7.98094	7.55753
VIT_10s0116g00940	6.54545	6.32721	7.20734	5.90448	7.28046	7.55666
VIT_13s0064g01220	6.85918	7.67549	8.36319	7.33798	8.09441	7.55157
VIT_05s0049g01180	7.69377	7.24397	8.11355	6.91528	8.15819	7.54386
VIT_14s0171g00160	6.79602	7.60266	7.01714	6.94872	7.30545	7.53926
VIT_18s0089g01030	5.45275	6.90617	7.87328	5.99533	7.77332	7.53768
VIT_02s0033g00390	-2.01937	6.17493	6.96694	1.95358	6.05028	7.52904
VIT_06s0004g01130	3.21257	7.0094	7.68288	4.06235	6.71864	7.52745
VIT_03s0017g00460	6.50589	7.13419	7.12571	6.329	6.61176	7.52711
VIT_04s0008g03770	5.86022	7.07078	7.90485	5.87946	7.29122	7.52636
VIT_14s0083g01140	2.28787	6.09085	8.07525	4.12708	5.12102	7.51869
VIT_06s0009g01930	6.40826	6.37851	6.96131	6.47135	6.53071	7.51473
VIT_13s0019g04300	8.2782	7.76838	7.40153	8.72392	7.94642	7.51094
VIT_07s0005g02200	6.96732	7.62612	7.9982	7.05637	7.86547	7.50985
VIT_07s0005g00290	5.88044	7.07607	6.37463	6.01881	6.6198	7.50584
VIT_18s0001g05570	4.7761	7.02166	6.91125	4.6603	6.92564	7.49775
VIT_19s0014g03510	6.54509	7.13617	7.65268	6.42503	7.45768	7.49599
VIT_19s0014g01390	6.47292	6.94583	6.84946	6.49846	6.96521	7.49268
VIT_11s0016g04230	6.57021	6.99027	7.54417	7.03052	7.7086	7.49239
VIT_10s0003g04880	6.6201	6.78964	7.49934	6.54556	7.1136	7.48859
VIT_17s0000g07820	6.34104	6.97227	7.37738	6.43868	7.32628	7.48784
VIT_09s0002g00810	7.35828	6.88955	7.07671	6.64962	7.02414	7.48282
VIT_16s0050g01250	6.27774	7.85381	7.99857	6.49841	7.93729	7.48148
VIT_11s0016g02450	5.82968	6.8806	7.75738	6.68468	7.15829	7.47627
VIT_01s0137g00330	-3.8365	7.98717	5.03636	4.38911	6.47956	7.47627
VIT_02s0025g01360	2.96347	3.22908	7.69718	3.20059	6.26822	7.47565
VIT_06s0009g03130	4.19088	5.18943	7.3587	3.90913	3.8268	7.47157
VIT_04s0008g06570	5.72319	6.88951	6.96104	4.72483	6.81617	7.47143
VIT_08s0058g00870	6.25102	7.21843	8.079	6.4926	7.72635	7.46766
VIT_09s0018g01940	6.65263	6.97204	7.38094	6.59857	7.12519	7.46519
VIT_18s0001g14520	7.40395	7.10598	6.81963	7.40395	6.32349	7.46456
VIT_08s0058g01230	5.24082	6.18064	8.30051	5.84633	6.04999	7.46309
VIT_18s0001g15460	4.77716	7.38632	8.04368	7.45409	6.65258	7.46224
VIT_05s0102g00130	6.66387	6.42917	7.16118	5.97476	6.12571	7.46102
VIT_13s0019g02360	6.4688	6.95121	7.52113	6.77021	7.71019	7.46072
VIT_18s0157g00190	7.85887	6.10657	7.37866	7.69105	7.35429	7.45755
VIT_08s0040g03150	4.76164	7.81031	8.05929	5.55039	8.7632	7.45675
VIT_08s0007g00720	6.70307	7.13275	6.738	6.25846	6.32751	7.45322
VIT_14s0060g02300	5.20451	7.1169	8.09996	5.64289	6.26128	7.45165
VIT_03s0088g00140	1.36364	5.65067	4.67186	-0.934198	2.0612	7.44934
VIT_03s0091g00360	6.69051	7.03716	6.94774	6.48516	6.76805	7.44117
VIT_01s0011g04820	4.86262	8.38871	7.74828	4.80941	6.25424	7.44032
VIT_13s0067g01240	1.02148	9.14227	8.7578	3.56925	8.36196	7.42652
VIT_12s0142g00160	5.04162	7.32448	7.17503	5.40849	7.08069	7.42363
VIT_07s0129g00930	3.9855	6.36481	8.32149	5.21166	6.8043	7.42254
VIT_13s0019g02780	3.4638	7.62186	9.17041	6.48848	8.80746	7.42223
VIT_18s0001g10450	6.04745	6.20294	6.97461	6.3197	6.78472	7.41419
VIT_12s0059g00810	6.91456	6.58195	7.60397	6.54313	6.94973	7.40843
VIT_10s0071g00840	5.64578	6.82184	7.79372	6.43996	7.0893	7.40803
VIT_04s0008g00610	8.88908	6.53952	7.40494	8.98372	6.9406	7.40645
VIT_09s0002g01750	8.01876	8.11861	6.74219	7.66647	6.75471	7.40349
VIT_18s0122g01320	5.96093	7.27597	8.12255	6.6521	7.41864	7.40057
VIT_08s0007g07530	6.12708	6.82107	8.26789	6.85495	7.09965	7.40005
VIT_05s0077g00910	6.83719	7.21697	7.87012	7.49281	7.56138	7.39338
VIT_14s0006g01990	6.65631	7.18742	7.6963	6.60822	7.29094	7.39034
VIT_01s0026g02710	5.68687	5.35003	5.96594	6.49458	6.59425	7.39023
VIT_17s0000g07850	8.9623	7.74409	6.41018	7.84875	7.37727	7.38917
VIT_17s0000g06400	4.90304	6.83807	6.60837	4.85233	6.62722	7.37941
VIT_13s0064g01210	5.67233	6.89901	8.15541	6.1594	7.27547	7.37313
VIT_07s0104g01810	6.94197	6.90481	6.16088	5.87045	6.07246	7.36819
VIT_17s0000g04150	7.4329	8.62631	3.54638	8.77327	7.75991	7.36632
VIT_19s0014g01350	7.4573	7.68634	6.67177	8.14182	7.47627	7.36346
VIT_06s0061g00790	5.59594	7.42853	7.26741	6.10566	7.22786	7.36311
VIT_09s0002g04020	9.61083	7.33116	7.85823	8.40028	8.29487	7.35767
VIT_17s0000g00010	5.03019	7.18758	7.70865	5.4958	7.39443	7.35376
VIT_18s0001g01060	4.07325	6.65487	7.70849	3.83761	4.74971	7.35326
VIT_04s0008g06050	6.43012	6.91508	5.6015	5.57107	5.76164	7.35053
VIT_08s0032g00840	5.98649	6.98349	7.27162	6.19607	7.05394	7.34634
VIT_04s0044g01850	6.32865	6.61878	7.4399	6.51507	7.08357	7.34483
VIT_18s0076g00360	8.28631	6.9612	6.51049	7.55344	6.82579	7.33593
VIT_16s0039g02040	6.6057	6.64554	6.79003	5.89174	6.22387	7.33193
VIT_02s0025g01410	6.61068	7.25156	7.64962	6.75796	6.80422	7.33181
VIT_03s0088g00570	6.92809	7.64431	6.48097	9.64673	7.56423	7.33008
VIT_13s0101g00100	6.82511	6.92358	7.03111	6.51638	6.98671	7.32978
VIT_17s0000g01910	8.20864	7.54569	7.10129	9.52116	7.76918	7.3279
VIT_05s0020g03860	2.97697	7.21306	6.69734	4.57188	6.92975	7.32589
VIT_06s0004g05770	4.72247	8.17661	10.2405	6.38859	9.04011	7.32535
VIT_03s0038g02300	8.3	6.9309	7.65194	7.5597	7.32544	7.31747
VIT_15s0048g02260	5.88826	6.34843	7.81134	5.21244	7.52513	7.31548
VIT_09s0002g06590	3.45724	6.93668	6.05028	2.74631	6.50425	7.30952
VIT_02s0025g00480	6.51738	6.81613	7.44631	6.68211	7.32727	7.30843
VIT_03s0017g02170	5.87635	4.77189	7.09793	6.4822	6.45028	7.30734
VIT_18s0001g08030	6.55939	6.29517	7.02237	5.85333	6.73809	7.30719
VIT_13s0019g03170	7.14204	8.2618	7.09926	7.36042	8.61665	7.3057
VIT_11s0016g03660	6.08697	6.81754	7.93913	5.86724	7.71078	7.30454
VIT_12s0034g02390	5.46706	7.25902	6.93373	5.76049	6.94388	7.29881
VIT_17s0000g06970	6.57147	5.75613	7.04082	5.73552	7.01718	7.29679
VIT_02s0025g02730	3.42805	5.57451	8.25101	4.22394	5.95435	7.29578
VIT_05s0020g03050	5.94251	6.98891	7.47059	5.82883	7.41903	7.29542
VIT_06s0004g02380	8.33774	7.13709	6.86109	8.18314	7.093	7.28999
VIT_08s0007g05550	6.60214	7.10245	7.6167	6.38773	7.61782	7.28848
VIT_14s0036g01020	6.80383	7.90605	7.12398	6.91329	7.38586	7.2878
VIT_18s0117g00320	6.71145	6.83609	6.32601	6.03379	6.2773	7.2871
VIT_09s0054g00930	6.61471	6.76111	7.11482	6.44852	6.92275	7.28596
VIT_07s0005g02170	6.73394	7.09022	7.6482	7.04199	7.5818	7.28534
VIT_08s0058g00670	6.53885	7.13617	7.63996	5.30913	7.61954	7.27619
VIT_08s0007g00200	5.45187	6.85312	7.59616	5.83895	7.42858	7.27432
VIT_03s0088g00270	7.18778	5.23189	6.82951	5.19548	6.2478	7.27333
VIT_05s0049g00200	7.14551	6.85918	7.02555	6.14466	6.93868	7.27093
VIT_17s0000g01950	6.44245	6.90485	7.13432	6.28485	6.66633	7.26597
VIT_15s0046g02300	7.35978	6.46581	7.90797	8.25852	6.94918	7.26369
VIT_09s0070g00160	8.06618	7.64186	8.68573	8.20281	8.24079	7.26344
VIT_18s0001g01080	6.22136	6.9573	7.40091	6.65287	7.62444	7.26238
VIT_15s0021g01060	4.25147	6.05231	6.93404	5.30354	5.73733	7.26216
VIT_07s0005g03660	6.15832	7.28707	6.56864	5.90215	6.42615	7.25619
VIT_18s0001g12850	6.50801	6.96867	7.49934	7.00619	7.34743	7.25506
VIT_07s0005g00070	5.99759	6.89255	7.34199	6.55689	7.1467	7.25396
VIT_16s0100g01270	6.33759	6.52831	6.92762	6.30597	6.90621	7.25367
VIT_10s0003g02610	6.78463	6.24926	6.9971	6.3361	6.65921	7.25049
VIT_18s0089g00410	5.29425	6.99725	6.77189	5.71955	7.41467	7.24869
VIT_08s0007g03690	4.97162	5.95977	7.30861	4.83761	6.99688	7.24767
VIT_18s0089g01170	8.42839	7.30873	6.92248	8.86357	7.98178	7.24225
VIT_18s0001g12420	6.75862	6.51528	7.84195	6.62654	7.27634	7.23391
VIT_02s0234g00130	6.5575	6.37289	7.43912	6.80503	7.58571	7.22776
VIT_17s0000g06860	5.59991	6.96936	7.66926	5.58486	7.17762	7.22548
VIT_09s0070g00490	6.07546	6.80894	7.3992	6.17858	7.33967	7.20952
VIT_07s0031g00220	6.31355	5.85067	6.84633	6.244	6.51927	7.20591
VIT_16s0050g02680	3.16457	6.92963	6.83424	4.18613	5.88801	7.2048
VIT_04s0023g01430	6.31753	6.61348	7.23528	6.69432	6.63672	7.1999
VIT_17s0000g03200	3.72574	6.26184	6.76447	3.6641	6.57803	7.19977
VIT_10s0071g00320	2.72247	5.96023	7.14006	2.99699	5.22587	7.19735
VIT_05s0077g02020	6.06494	6.23815	7.06946	6.75942	6.35515	7.19689
VIT_14s0060g02270	5.60832	7.35117	7.55995	6.02938	7.05014	7.19384
VIT_12s0028g03270	6.01026	8.25748	8.42425	6.5697	7.6078	7.19157
VIT_03s0038g03430	8.04647	7.97911	9.0789	7.19088	9.22172	7.18024
VIT_07s0005g02070	6.13203	6.72928	7.78638	6.11235	6.50806	7.17885
VIT_10s0071g00740	5.72265	6.5435	6.41571	5.255	5.92632	7.17456
VIT_13s0019g02930	2.97392	7.97768	10.2759	6.09276	9.02676	7.17139
VIT_11s0118g00420	7.30409	6.17878	5.80693	6.26847	5.45768	7.16752
VIT_08s0007g02190	8.70357	7.32316	6.90777	9.54026	7.97894	7.16289
VIT_17s0000g09490	8.07023	5.83272	7.54141	8.44204	6.50027	7.16229
VIT_17s0000g02020	6.95834	5.68426	7.67077	6.86262	6.86001	7.15738
VIT_01s0127g00680	1.18903	6.21075	6.94529	2.52607	5.88923	7.15718
VIT_11s0016g02850	6.04927	6.60457	7.65719	5.98254	7.0517	7.15694
VIT_09s0002g05150	4.12571	4.25248	7.77724	4.97147	6.29297	7.15073
VIT_17s0000g02630	-1.10988	9.3395	4.45461	7.04716	7.10859	7.15005
VIT_09s0002g04320	9.26928	7.60328	6.67464	9.4989	8.01911	7.14917
VIT_06s0004g00240	6.33682	7.07068	7.24704	7.05983	7.39909	7.14893
VIT_15s0046g01430	5.71991	7.22792	6.97961	6.02407	6.80645	7.14717
VIT_04s0008g03810	6.36929	6.83196	7.02499	6.31765	6.93239	7.14524
VIT_14s0108g01320	9.22713	7.71046	7.03826	8.62494	8.51943	7.14013
VIT_19s0014g02340	6.80025	7.76891	6.81408	7.27798	7.17473	7.13501
VIT_18s0001g05040	10.7986	8.32414	7.23071	10.0555	8.51175	7.12911
VIT_11s0016g04190	7.32912	7.23678	7.58373	6.33973	8.18241	7.12836
VIT_11s0016g04390	5.85266	6.55842	6.7226	6.06709	6.36148	7.1197
VIT_01s0026g00840	6.4814	6.4073	7.36393	6.64645	7.32364	7.11794
VIT_06s0004g02680	6.01941	5.58346	6.0497	5.74281	5.95474	7.11416
VIT_10s0003g02070	8.5328	7.43271	7.23026	8.11558	7.41577	7.111
VIT_04s0008g06040	5.95992	6.46521	6.92438	6.92983	6.62804	7.10772
VIT_15s0048g01420	6.08916	5.99466	7.87764	5.38865	7.56145	7.10661
VIT_05s0020g01490	6.94552	6.90545	7.81365	7.79281	8.02571	7.10535
VIT_02s0012g01570	6.36288	6.8186	7.00109	4.88671	6.46744	7.1028
VIT_01s0010g01180	6.66401	6.85902	6.69456	6.07532	6.57087	7.10224
VIT_02s0025g04300	-0.643856	4.93923	7.1152	2.01911	4.75203	7.10217
VIT_16s0013g01120	7.23311	5.42928	7.0603	7.56069	6.65874	7.10185
VIT_07s0141g00570	8.11799	7.53988	6.17413	8.73309	7.3429	7.10126
VIT_12s0028g00710	6.45061	6.78612	7.54602	6.73579	7.03228	7.09596
VIT_13s0019g03490	6.1594	6.81164	7.07963	6.37585	7.03735	7.09286
VIT_15s0048g00500	2.12653	7.79602	3.28983	2.56153	6.9833	7.09248
VIT_02s0025g02420	6.55428	6.54221	7.01581	5.56489	6.19856	7.09036
VIT_02s0025g04130	8.02436	7.69402	8.25767	5.73263	8.09782	7.08927
VIT_14s0219g00120	6.21225	6.40764	6.41188	6.32139	5.9908	7.08406
VIT_17s0000g06280	8.1612	6.00966	6.89817	7.93591	6.74712	7.08357
VIT_17s0000g08480	6.1596	6.97835	7.47819	6.86196	7.50869	7.08339
VIT_11s0149g00220	7.09986	6.8562	7.80232	8.13663	7.93282	7.08073
VIT_13s0067g00610	7.74286	7.21027	6.45905	7.78647	6.96347	7.07977
VIT_08s0040g02190	-0.0995357	6.46445	5.46271	1.36737	4.27575	7.07571
VIT_17s0000g04910	6.19738	7.05925	6.30384	6.12412	6.54205	7.06429
VIT_18s0001g12480	5.8674	6.90637	7.01212	6.1559	7.22426	7.05792
VIT_11s0118g00240	5.93782	6.581	6.68164	6.00165	6.58916	7.05311
VIT_06s0009g02810	3.99065	6.11569	4.06149	4.41436	3.21257	7.05311
VIT_05s0077g00520	7.91385	7.48827	4.65783	7.99044	5.61765	7.04541
VIT_14s0060g01730	7.84856	8.06709	5.65793	8.11322	6.43357	7.04078
VIT_07s0005g00150	6.94657	7.14061	7.44821	6.49014	7.59907	7.03954
VIT_01s0026g00940	5.48188	6.45105	7.49673	4.98216	7.00667	7.03295
VIT_17s0000g05680	7.04894	5.73606	7.36504	7.14924	6.29591	7.03089
VIT_04s0008g01210	8.10254	7.15002	7.3797	6.9344	8.04044	7.02687
VIT_15s0024g00040	8.37827	7.37764	6.82371	9.16141	8.05709	7.01885
VIT_07s0005g00660	4.7643	6.77312	8.15049	5.45943	7.45856	7.01551
VIT_01s0150g00640	6.11242	6.90324	7.35406	6.30244	7.1863	7.01324
VIT_05s0094g00530	9.19589	6.66102	6.39335	8.02229	6.23068	7.0091
VIT_16s0050g00950	6.33914	6.94794	7.13309	5.94751	6.80413	7.0088
VIT_08s0007g07330	8.98281	6.81519	6.60496	6.78625	6.7974	7.00798
VIT_07s0129g00180	6.75422	7.25191	7.44766	5.83609	7.92961	7.00791
VIT_10s0003g00390	6.29229	6.39495	6.78044	5.60999	6.02473	7.00398
VIT_08s0032g00760	6.50742	6.50547	7.43165	6.08357	6.97059	7.00319
VIT_12s0028g02180	8.35421	6.39243	7.39338	8.81256	7.18004	7.00098
VIT_02s0025g04560	5.42593	7.10101	5.59206	5.67214	5.95093	7.00049
VIT_14s0128g00390	6.00023	5.82094	7.66912	6.07175	6.756	7
VIT_13s0019g02850	2.82917	7.23793	8.87982	6.12267	8.49315	6.99733
VIT_17s0000g09100	6.90809	7.91464	5.68585	6.47487	6.85616	6.99714
VIT_06s0004g04300	7.829	6.93962	6.7556	8.11425	6.91612	6.99266
VIT_11s0016g05190	8.13901	6.76443	6.82337	7.57036	6.53812	6.98702
VIT_07s0005g00490	8.60922	6.6926	7.23308	7.37831	7.30952	6.98637
VIT_03s0180g00260	7.71957	6.60802	6.53983	8.75518	7.32888	6.98162
VIT_04s0008g06150	4.82612	6.12191	8.38491	5.65306	7.45124	6.97522
VIT_05s0020g03530	-1.52838	7.91564	7.96794	3.89271	8.21579	6.97476
VIT_11s0037g01210	7.36224	5.24336	7.18504	6.2975	6.26184	6.97166
VIT_13s0073g00170	6.17998	6.42844	7.24774	6.02768	7.25367	6.97139
VIT_12s0057g00520	6.88947	7.22535	7.82048	7.11631	7.65724	6.96844
VIT_02s0033g00130	5.70874	6.37747	7.08934	5.98246	6.09233	6.96482
VIT_08s0007g01360	5.06537	7.71032	6.87795	5.66268	7.6694	6.96417
VIT_06s0004g04110	1.55254	4.0009	7.34139	2.40871	7.00184	6.95424
VIT_02s0154g00610	5.79433	6.51154	6.88036	6.10866	6.44056	6.95171
VIT_05s0020g00840	0.499102	8.54279	8.08522	4.09198	8.17885	6.94961
VIT_11s0016g03110	5.95675	6.38836	6.68328	5.81087	6.40537	6.9472
VIT_14s0066g01440	6.73674	6.43407	6.11458	5.89118	6.14282	6.94696
VIT_04s0023g01390	-2.47393	8.41112	7.85922	3.1375	7.79604	6.94197
VIT_19s0014g00450	4.57451	5.74497	6.02407	4.69729	5.88297	6.93302
VIT_19s0014g02880	3.41594	6.67718	6.03379	4.68706	5.78031	6.93271
VIT_01s0010g03510	-1.334	6.45231	6.96855	2.57046	7.20405	6.93255
VIT_18s0001g00490	5.64539	6.54112	6.8413	5.78258	6.69803	6.93255
VIT_11s0037g00810	6.23292	6.57572	7.09652	6.75707	6.87012	6.93243
VIT_16s0022g00510	3.42939	8.46092	7.55262	5.27451	8.70104	6.93227
VIT_11s0118g00390	5.10112	6.32331	5.9342	5.16054	5.1035	6.93204
VIT_12s0028g01150	6.41261	6.76545	6.35415	5.67261	6.13491	6.93097
VIT_08s0032g00590	-5.05889	7.61824	6.98368	4.50314	6.99058	6.92888
VIT_11s0016g04080	2.62449	8.3039	7.2031	5.10671	8.04014	6.92778
VIT_07s0104g00440	5.76615	6.59976	6.59345	5.81327	6.28361	6.92608
VIT_02s0025g00380	6.12763	6.21289	6.74219	5.90545	6.65726	6.9197
VIT_16s0098g00660	6.75538	6.30208	6.3651	6.08187	6.43607	6.91934
VIT_01s0127g00060	5.80064	6.34708	7.45316	6.31379	7.36594	6.91596
VIT_06s0004g03000	5.79736	6.52852	6.59325	5.9245	6.50356	6.91129
VIT_18s0001g12560	5.99473	6.4116	7.29817	6.00518	7.13819	6.90845
VIT_18s0001g09460	7.52831	7.66133	7.67833	8.60104	9.42342	6.90713
VIT_18s0001g01030	3.66714	6.53766	6.70483	4.45943	6.29205	6.90356
VIT_06s0004g07500	6.18362	7.19676	7.84722	6.16524	7.79874	6.9034
VIT_06s0004g03890	7.7112	7.18837	6.70363	8.16397	6.91735	6.90199
VIT_09s0002g05800	6.5233	6.39163	5.95257	6.21244	5.76783	6.89918
VIT_08s0056g01150	7.25905	6.76823	6.76204	7.93489	6.66643	6.89684
VIT_05s0049g00090	7.44529	5.52638	7.13805	8.51433	6.79268	6.89518
VIT_14s0171g00460	6.24875	6.35415	7.33515	6.38226	7.04869	6.89328
VIT_11s0016g03130	5.52367	6.35126	7.20848	4.9397	7.06616	6.89304
VIT_17s0000g08290	3.32385	6.56682	6.70754	4.35779	6.44686	6.89158
VIT_08s0105g00380	5.08491	4.44228	5.72347	4.86196	4.65382	6.89158
VIT_07s0031g00670	5.25172	6.96955	6.65115	5.61873	6.7216	6.88635
VIT_13s0064g00890	9.08835	7.58494	6.84	8.73691	7.77753	6.87983
VIT_02s0025g03660	8.29895	7.70312	8.07253	8.41893	8.33505	6.87934
VIT_05s0077g00750	7.04283	6.07182	6.34127	5.93271	6.3672	6.87836
VIT_08s0105g00300	6.90597	5.17393	6.44526	6.88032	5.51149	6.87603
VIT_08s0040g01950	4.47162	6.06149	6.90673	4.63788	5.81703	6.87529
VIT_12s0028g03860	6.26172	5.59455	6.42872	6.46423	5.84975	6.87336
VIT_14s0066g00290	5.76022	6.69725	6.6295	5.83002	6.61883	6.86934
VIT_06s0004g01650	5.81558	6.86237	4.06551	4.43741	4.57107	6.86901
VIT_14s0108g00830	5.06091	5.97789	7.25575	4.52836	5.77074	6.86872
VIT_02s0012g01040	2.76553	5.95567	4.12543	3.48199	3.41684	6.8674
VIT_05s0020g04510	10.3325	7.53962	7.75161	10.4447	9.49386	6.86674
VIT_02s0025g01570	7.72563	6.43829	6.74542	7.16444	6.7502	6.86282
VIT_07s0005g04130	7.00895	6.91189	6.6374	5.72756	7.31907	6.8622
VIT_18s0001g12430	5.48896	5.84113	5.73082	5.92347	5.8928	6.85993
VIT_02s0012g00760	5.5403	5.99216	6.93872	5.44139	6.46331	6.85512
VIT_08s0056g01310	5.59026	6.15408	6.78228	5.779	6.249	6.85408
VIT_07s0005g00340	6.30682	6.48215	7.17752	6.20874	6.98918	6.85254
VIT_01s0011g04240	2.95171	5.8089	6.42917	3.66107	5.6154	6.85179
VIT_12s0057g00630	9.61925	7.5713	6.79489	9.99452	8.44421	6.85042
VIT_17s0000g03280	7.99375	6.27767	6.09838	7.29878	6.95532	6.84699
VIT_18s0001g02300	5.44228	6.77439	6.94973	5.97774	6.80521	6.84218
VIT_01s0150g00520	8.26552	7.15262	6.64597	7.81237	7.05065	6.8382
VIT_14s0006g00350	7.86384	6.69497	6.56616	7.38411	6.06034	6.83685
VIT_01s0011g05240	9.1972	7.67129	6.51191	8.3303	7.3978	6.83538
VIT_14s0171g00400	4.26704	4.59236	6.59574	4.06867	5.83853	6.83428
VIT_16s0098g00560	7.92335	7.32523	6.60674	7.57987	7.27563	6.83394
VIT_12s0059g00640	5.65402	6.15272	6.83403	5.68575	6.50446	6.83297
VIT_08s0056g00810	5.50832	6.37231	7.0534	6.28793	6.63991	6.83023
VIT_19s0014g02480	5.91257	6.59176	6.86468	6.42038	6.78005	6.82998
VIT_02s0025g04210	5.52367	5.94142	6.06264	5.0069	5.98831	6.82858
VIT_06s0004g02890	8.11246	6.9509	6.7201	7.84929	7.04129	6.8285
VIT_10s0003g04540	2.47422	5.52795	6.62434	2.75845	5.65888	6.82583
VIT_18s0122g00610	7.98349	7.00832	7.61314	7.71376	8.05193	6.82443
VIT_06s0004g05960	7.60286	5.98793	6.82799	7.88464	6.90529	6.82043
VIT_04s0008g04210	6.06206	6.43463	7.0433	6.02923	6.33145	6.81958
VIT_08s0007g01340	6.16845	6.09908	7.06885	6.08073	6.98003	6.816
VIT_02s0087g00790	5.81455	6.62366	6.97419	6.36089	6.75302	6.81395
VIT_17s0000g09690	6.20653	7.04425	6.6553	6.59952	7.04909	6.81374
VIT_11s0016g04630	7.77711	5.9583	6.39775	7.19653	6.47417	6.81164
VIT_14s0128g00340	-5.90689	7.34107	7.05134	2.09986	7.46494	6.8098
VIT_06s0004g04730	5.98041	6.31173	7.26779	6.29395	6.44156	6.80491
VIT_15s0048g02530	4.66524	7.5318	6.26722	5.48586	6.70671	6.79926
VIT_08s0007g05570	3.64923	6.4991	6.81703	4.24387	6.78293	6.79753
VIT_17s0000g01820	-7.22882	7.93981	7.60694	2.73118	7.87197	6.79632
VIT_09s0070g00240	7.28928	6.2918	6.67826	8.3534	5.91584	6.79584
VIT_10s0092g00010	6.1433	6.6242	6.97522	6.20542	6.31143	6.79121
VIT_04s0023g00690	5.18996	6.14866	6.89191	5.2292	6.59151	6.78999
VIT_12s0034g01370	5.48134	6.70335	6.48854	5.81822	6.12329	6.78838
VIT_14s0128g00120	6.08073	6.20085	6.94017	6.74133	6.8615	6.78742
VIT_03s0017g02330	5.85217	6.21962	6.84352	6.18785	6.26404	6.78586
VIT_13s0158g00090	2.94922	6.46755	8.53026	3.70671	6.95582	6.78184
VIT_08s0007g02570	5.2765	6.31439	6.3064	5.3755	5.69302	6.77852
VIT_14s0108g00520	-3.76939	7.84266	4.72374	1.19535	5.95179	6.7714
VIT_15s0021g01220	5.96717	6.33616	6.91906	6.24647	6.59813	6.77114
VIT_02s0025g01180	5.48661	6.35085	6.74649	5.50748	6.28287	6.77017
VIT_16s0050g00390	2.0048	6.37666	7.23311	3.72283	6.46641	6.76598
VIT_07s0005g04700	6.16027	6.54381	5.78285	5.51054	5.08406	6.7604
VIT_06s0004g06100	5.49185	6.63009	6.17106	5.32649	6.53476	6.75805
VIT_19s0014g01640	5.30634	6.42615	6.85404	5.19377	6.72233	6.75306
VIT_11s0016g04700	6.44123	7.30223	7.50414	5.70782	7.457	6.7438
VIT_12s0028g03640	2.11548	8.42496	7.66621	3.92061	7.42875	6.74295
VIT_06s0061g00540	6.02702	6.21936	7.02964	6.20026	6.48161	6.74201
VIT_17s0000g07450	5.7045	6.28602	7.14639	6.22696	7.30393	6.73935
VIT_17s0000g01550	5.95365	6.71434	6.87762	6.40798	6.82934	6.73917
VIT_01s0011g06250	7.43782	6.06257	6.70773	6.74367	5.95536	6.73457
VIT_04s0008g05770	7.54522	6.05427	5.52325	6.05824	5.92529	6.73331
VIT_07s0031g00920	10.6119	6.93184	6.12529	9.30289	6.63947	6.73326
VIT_19s0014g03400	5.77356	6.56712	7.10374	5.13873	7.09487	6.732
VIT_14s0060g01300	1.47162	5.63372	7.08137	3.7481	4.45242	6.73141
VIT_10s0116g00500	5.86419	5.53294	5.39666	6.32757	5.57451	6.72996
VIT_14s0068g00740	2.3084	6.83027	4.04614	4.06293	3.6373	6.72933
VIT_11s0052g00630	2.10657	5.47832	6.66297	2.11214	6.42004	6.72846
VIT_06s0004g06070	5.01182	6.45796	6.15401	5.42995	6.00525	6.72506
VIT_12s0028g00830	6.12012	6.64909	7.071	6.52	6.92707	6.72206
VIT_05s0020g04160	6.68762	5.91233	7.13873	6.57662	6.81151	6.71804
VIT_07s0031g01300	8.00214	6.61196	6.66988	7.71804	6.48166	6.7148
VIT_01s0026g01460	6.8934	7.46888	7.21066	6.33599	8.03087	6.71379
VIT_06s0004g06510	6.16819	6.39917	6.7034	5.73633	6.43463	6.7103
VIT_02s0025g04310	-0.152003	4.32024	7.54117	2.03562	5.06278	6.70681
VIT_06s0004g05030	6.01955	6.06019	6.86823	6.23764	6.72379	6.70317
VIT_06s0004g04490	5.25839	6.393	6.76452	5.66818	7.0254	6.70099
VIT_05s0094g00340	0.363638	4.83474	9.96024	4.09255	6.33062	6.70081
VIT_07s0205g00070	4.60526	6.33366	6.89901	4.37527	5.93003	6.69674
VIT_07s0031g02250	4.74595	5.72401	6.5168	4.96501	6.11582	6.69093
VIT_03s0097g00530	5.48704	7.14768	6.66723	6.32523	7.29251	6.68529
VIT_08s0007g01620	6.95671	6.44416	5.25462	6.11631	5.65592	6.67835
VIT_18s0164g00100	6.32577	4.95559	5.38359	6.24463	5.18203	6.67779
VIT_03s0063g00830	6.13825	6.59773	7.41931	6.98732	7.76456	6.67605
VIT_06s0004g05550	7.12829	6.42548	6.09219	5.72092	6.01324	6.6728
VIT_05s0077g00730	4.77259	6.65597	7.52223	4.63672	7.36481	6.67243
VIT_05s0049g01070	3.5656	4.96517	5.70699	3.12873	3.62449	6.66813
VIT_12s0059g00880	4.98261	5.08704	6.44366	3.85033	5.98618	6.66638
VIT_12s0057g00090	-0.467267	6.87705	7.69611	3.48457	4.95528	6.66434
VIT_01s0127g00540	6.6865	7.10577	7.5811	7.51951	7.31412	6.65735
VIT_07s0005g02570	6.26922	6.16872	5.62663	6.58646	5.9617	6.65707
VIT_14s0006g02950	4.52649	6.75636	8.12233	6.58281	6.75951	6.65421
VIT_08s0007g01450	6.67238	7.90743	7.78101	6.97246	7.99349	6.65316
VIT_08s0007g07620	4.87004	5.57541	6.38463	5.40122	5.90945	6.65306
VIT_17s0000g06590	6.36626	7.43154	7.40998	6.04447	8.04224	6.65215
VIT_06s0009g01620	5.11437	7.67908	8.42924	5.10783	8.03599	6.65129
VIT_01s0026g00280	5.13217	5.71534	6.55331	5.15637	6.11194	6.65115
VIT_01s0011g01420	5.45286	6.10999	6.39117	5.59186	6.35197	6.6488
VIT_14s0083g00110	7.78291	6.8071	5.65783	7.11263	6.33074	6.64607
VIT_11s0118g00250	5.57803	7.22471	7.3293	6.04512	6.77698	6.64458
VIT_11s0037g00130	5.58306	6.39815	6.73503	5.71937	6.36836	6.64304
VIT_03s0063g00140	8.10096	6.68145	6.87942	9.67961	6.78202	6.64188
VIT_17s0000g09470	5.03313	6.06278	4.08236	3.96932	4.38059	6.64078
VIT_14s0171g00490	7.52878	6.06386	6.62161	7.28663	6.06867	6.63904
VIT_03s0038g03730	5.17299	6.44918	6.48306	5.14541	6.62244	6.6373
VIT_03s0038g00250	5.56753	6.44945	6.35526	5.67629	6.64544	6.63329
VIT_14s0083g01110	4.80718	7.0781	7.72574	6.63918	8.00645	6.6327
VIT_01s0010g00060	5.0145	6.63193	7.53569	4.74362	7.37368	6.63207
VIT_06s0004g00590	-0.460634	5.80383	6.3552	2.6893	5.76633	6.62566
VIT_02s0234g00100	5.6279	6.15056	6.63275	5.71973	6.37926	6.62547
VIT_06s0004g03810	5.66912	6.31524	6.79385	5.54659	6.0066	6.62439
VIT_13s0019g00860	2.18057	6.91197	7.73475	4.45352	7.14282	6.62034
VIT_03s0038g04400	5.29487	6.25323	5.94181	5.51022	5.61775	6.61682
VIT_01s0011g01990	7.87566	6.45899	6.35984	7.37489	6.50716	6.61324
VIT_18s0164g00040	6.08972	5.75773	6.98143	5.76483	6.69521	6.61299
VIT_17s0000g06350	8.48418	6.8128	6.07568	9.18388	7.73399	6.61117
VIT_16s0022g00540	5.1088	5.77189	5.88289	4.35168	6.19633	6.60629
VIT_16s0098g00870	5.87225	5.77329	6.35532	5.72846	5.77338	6.60377
VIT_18s0001g14270	7.03107	7.21121	6.224	7.36999	5.96031	6.60293
VIT_05s0020g00970	6.88651	6.91668	5.40315	6.34258	5.77707	6.60105
VIT_13s0019g01180	5.69933	4.86229	7.23643	5.90929	6.58521	6.59823
VIT_13s0101g00460	4.71406	5.4174	5.03239	4.09564	4.79494	6.59594
VIT_18s0001g01020	6.19771	6.21036	6.59116	5.3159	6.56519	6.59286
VIT_01s0146g00250	4.76412	6.4233	7.04516	4.90207	6.74295	6.59196
VIT_03s0038g02380	8.20651	6.87864	6.6814	8.10699	6.77492	6.59111
VIT_03s0097g00510	4.89579	5.58506	6.28756	3.64347	6.27761	6.59071
VIT_18s0001g15010	5.71085	6.71443	6.18342	6.22271	6.74681	6.58991
VIT_10s0597g00020	5.49889	6.14575	6.77821	5.3552	7.05691	6.58911
VIT_05s0049g01100	3.45681	4.79424	5.51065	2.97636	3.4285	6.58911
VIT_17s0000g01970	7.49772	5.83702	6.21749	7.62469	6.11728	6.58701
VIT_08s0007g05000	7.52136	5.98254	7.0468	8.25434	6.07717	6.58471
VIT_08s0007g01810	2.67205	6.58581	5.66969	3.77821	6.02081	6.58441
VIT_10s0116g00530	7.0847	7.61346	7.03232	8.03811	8.75435	6.58135
VIT_05s0020g01960	5.12571	6.61618	6.28077	4.52063	6.50176	6.57577
VIT_17s0000g02430	7.08233	5.8449	6.45011	5.23993	5.71333	6.57567
VIT_15s0048g02100	5.74739	6.3014	6.58886	6.13627	6.4467	6.57319
VIT_01s0011g04250	3.63537	5.32133	6.32127	4.03855	5.73317	6.57168
VIT_19s0015g01850	5.65239	5.62994	6.85025	5.45275	6.17632	6.57107
VIT_17s0000g06190	4.43296	4.71315	6.49591	4.05947	5.53367	6.56996
VIT_05s0020g04210	6.7929	5.91576	7.19348	7.15394	6.59251	6.5693
VIT_06s0009g02230	4.85732	6.29909	8.08707	5.6009	6.83441	6.56915
VIT_07s0005g02020	5.58025	6.20052	6.04818	5.48629	6.0835	6.56311
VIT_12s0059g00520	5.73651	5.94611	5.95233	5.35638	6.28454	6.56061
VIT_07s0104g00590	5.15799	6.19206	6.81203	5.9214	6.22696	6.56021
VIT_05s0020g03080	5.55049	6.47849	6.3803	5.63169	6.59006	6.55944
VIT_19s0014g01870	5.48468	6.37463	6.40764	6.09656	6.15853	6.55832
VIT_18s0001g06560	5.57823	7.24108	7.41628	5.64511	7.38353	6.55607
VIT_07s0031g00460	5.02768	5.55755	6.18362	5.26754	5.57944	6.55152
VIT_17s0000g02680	1.39689	8.22093	5.3101	4.01346	6.55934	6.5507
VIT_11s0052g01700	8.42911	6.44189	6.50964	8.66453	6.22362	6.55064
VIT_06s0061g01250	5.9899	6.10622	6.52246	7.28913	6.61432	6.55008
VIT_03s0091g00260	3.485	5.34861	5.90737	3.64232	5.31868	6.54751
VIT_07s0005g02010	6.46412	7.44391	5.732	9.10023	7.05604	6.54236
VIT_13s0019g04260	7.39177	5.83962	6.13621	6.60758	5.87529	6.53683
VIT_03s0088g01250	8.13685	6.73041	6.2047	7.44477	6.52058	6.53008
VIT_12s0057g01090	3.33961	7.63028	6.23891	4.24869	7.17356	6.5268
VIT_06s0004g03140	5.14853	6.01599	7.09708	5.72955	6.64803	6.52539
VIT_07s0031g02130	6.51848	6.59246	7.18402	6.45094	7.35391	6.52482
VIT_01s0011g02310	3.20685	6.21432	6.43084	3.44978	5.78738	6.52095
VIT_14s0068g00520	6.18355	6.14153	7.01896	5.89466	7.12543	6.51979
VIT_04s0008g02250	9.16133	5.47973	6.24387	8.61603	5.96201	6.51833
VIT_03s0063g02310	5.93263	6.06523	6.2171	5.52429	5.87316	6.51817
VIT_01s0011g03700	5.55766	6.74873	7.17163	6.03562	5.97024	6.5178
VIT_14s0068g01000	5.71241	6.18923	6.38065	5.70201	6.77219	6.51607
VIT_14s0081g00480	7.53188	7.12794	6.17925	7.66422	6.54514	6.5158
VIT_10s0003g01600	5.33616	5.48317	6.59629	5.44228	6.14541	6.51423
VIT_08s0007g06520	6.27767	5.97461	6.35697	5.31179	6.19587	6.50483
VIT_01s0011g04760	4.75685	5.39757	5.61029	5.1507	4.74344	6.50483
VIT_19s0015g00730	5.54731	5.84608	5.54236	5.40281	5.81044	6.49239
VIT_04s0023g01890	2.7348	7.78188	6.41684	5.02916	7.1347	6.49191
VIT_09s0002g07880	7.94537	6.60901	5.65516	6.72996	6.19075	6.49175
VIT_18s0001g06310	5.48543	5.85765	7.22123	5.14309	6.68187	6.49137
VIT_12s0035g01150	7.54805	6.91448	6.255	7.67374	6.85416	6.48698
VIT_03s0038g02780	7.32277	6.82782	5.88052	6.96505	6.28114	6.48521
VIT_04s0008g01230	6.85757	5.93003	7.57041	7.38813	6.6604	6.48269
VIT_08s0007g04180	3.7984	6.21075	7.46156	4.64405	6.16249	6.48269
VIT_01s0010g03860	7.94058	7.16769	6.54448	7.98269	7.02986	6.4808
VIT_03s0017g00550	5.30791	6.33908	6.39386	5.84214	6.58381	6.47843
VIT_07s0031g00350	8.47009	6.6175	6.29026	9.06992	6.28873	6.47795
VIT_05s0102g00710	8.4167	5.6744	4.55561	7.36051	3.90143	6.47373
VIT_06s0009g03430	5.58636	6.34127	5.72429	5.28663	5.64241	6.47303
VIT_17s0000g02140	5.02459	5.65239	6.00921	3.77891	4.38198	6.47222
VIT_01s0011g01290	5.40429	5.82451	6.4669	5.38693	5.829	6.46999
VIT_13s0156g00060	7.14473	6.86736	5.93829	6.90829	6.41171	6.46978
VIT_09s0002g07110	5.6543	6.09374	6.11145	5.59016	5.83297	6.46951
VIT_14s0081g00010	7.85416	5.65153	7.0339	7.97743	7.22827	6.46885
VIT_16s0039g00720	4.91441	5.95311	5.83213	4.85864	5.32205	6.4675
VIT_05s0049g00050	5.49793	6.3203	5.15745	3.88297	4.93734	6.46717
VIT_08s0007g08170	5.29082	5.79225	7.22705	5.52492	5.64847	6.4657
VIT_04s0008g03100	5.06235	5.85674	4.60565	3.69488	4.02503	6.46265
VIT_11s0016g05430	5.20307	4.69395	8.02638	5.10252	6.67337	6.46178
VIT_08s0007g02360	6.06257	5.8627	7.47084	4.96394	6.80465	6.46091
VIT_10s0003g02060	5.88264	5.23866	6.33193	5.53045	6.32235	6.46003
VIT_07s0005g00700	4.72538	5.72774	6.24584	5.31058	6.03972	6.45938
VIT_15s0046g01440	5.57561	6.7456	6.19797	5.33485	6.26878	6.45861
VIT_07s0005g00270	6.08661	6.16584	5.40315	5.23202	5.34955	6.45533
VIT_04s0023g00130	-0.819428	7.43474	7.2191	6.35954	7.40452	6.4545
VIT_02s0025g00820	4.63382	5.76288	4.93294	3.92537	5.23381	6.45429
VIT_18s0001g11520	-1	7.99199	8.17739	2.89142	8.05257	6.45116
VIT_04s0044g01620	5.24603	6.06889	6.19882	5.33819	6.21736	6.44565
VIT_01s0011g04830	5.80632	6.03137	5.14826	5.33866	4.72174	6.44001
VIT_12s0028g02160	8.06819	6.57072	6.35032	7.80828	6.66145	6.4394
VIT_16s0098g00270	4.84348	5.99601	7.08658	5.04177	5.99857	6.43757
VIT_18s0089g00920	6.15401	6.02414	6.09923	5.41785	6.06393	6.4334
VIT_02s0012g00090	3.83828	4.59872	5.84616	4.17898	5.0492	6.43285
VIT_19s0027g00740	7.32217	5.59544	5.90497	7.40196	6.14391	6.43207
VIT_03s0038g00880	3.93703	5.73733	5.27922	4.29597	4.3389	6.43012
VIT_18s0001g15220	3.89045	5.82672	7.6077	6.52079	7.59785	6.42923
VIT_11s0016g01130	5.63333	5.53284	5.51644	5.98056	5.43674	6.42229
VIT_19s0090g00400	5.23266	5.52701	6.05673	4.56742	5.52586	6.42004
VIT_06s0004g07970	2.73841	3.59971	4.86113	1.4957	4.93137	6.41723
VIT_08s0040g01760	6.55964	5.26216	6.2182	6.8505	5.67309	6.41397
VIT_05s0020g02270	7.33026	7.92446	7.94459	7.76885	8.2386	6.41289
VIT_08s0007g04790	4.56031	5.39632	6.74886	4.68557	6.25147	6.41182
VIT_08s0056g00120	5.51623	5.80107	6.51549	5.38174	6.42699	6.41086
VIT_05s0077g02040	5.57188	6.07389	6.28466	5.4192	6.006	6.41069
VIT_04s0044g01670	7.26956	5.60713	6.78677	6.4048	6.36112	6.40984
VIT_01s0011g00370	8.05861	6.82434	6.24723	7.60147	6.97338	6.4044
VIT_17s0000g10190	5.66391	6.57077	6.67077	5.97185	6.62059	6.40287
VIT_06s0004g02140	3.90336	6.2894	6.04731	5.58215	5.89377	6.40151
VIT_11s0037g00070	7.5941	6.68253	7.26697	8.5763	7.99264	6.39832
VIT_01s0026g01340	7.73439	4.59773	5.33175	7.0755	5.28306	6.39689
VIT_16s0039g02600	2.73769	5.34127	2.32097	-0.245825	1.77961	6.39501
VIT_01s0011g04550	5.19154	7.3613	7.1636	5.16591	6.37278	6.39381
VIT_17s0000g01110	7.49737	7.69365	6.26297	7.92529	6.95907	6.39295
VIT_08s0007g03770	7.6037	6.71946	5.91512	7.75253	6.14098	6.39272
VIT_16s0050g01850	7.3043	7.16283	5.90143	7.38319	7.02348	6.3898
VIT_03s0091g00320	5.8154	6.2414	7.33408	6.60728	6.95548	6.38836
VIT_14s0030g01740	5.45516	5.3704	5.02414	5.47379	4.65878	6.38463
VIT_05s0102g00120	5.53315	5.78389	6.36883	5.71131	6.34021	6.38059
VIT_11s0016g01230	7.20307	6.20013	5.93899	6.57486	6.33014	6.37712
VIT_08s0058g01140	4.89789	5.74891	6.26785	4.89579	5.53211	6.37371
VIT_05s0049g00960	5.34696	5.89668	6.36486	5.66912	6.09085	6.37179
VIT_19s0014g02250	4.94361	6.13627	6.67901	5.2301	5.97881	6.36784
VIT_14s0066g01720	5.63304	6.6127	5.99684	5.64885	6.38319	6.36521
VIT_02s0025g01260	6.50356	6.35468	7.81308	6.27482	8.3087	6.36469
VIT_05s0020g01980	6.77764	6.32481	6.03335	7.23451	5.97085	6.36265
VIT_18s0001g00950	5.2929	5.69014	7.13395	5.0036	5.64837	6.36142
VIT_13s0156g00150	4.54987	6.77904	7.17313	4.62156	7.10703	6.3596
VIT_07s0005g00060	7.38552	6.90424	5.77645	7.69928	6.78197	6.3596
VIT_11s0037g00470	5.54277	6.3627	6.36591	4.70727	6.14839	6.35644
VIT_07s0031g00660	7.81481	6.88757	6.57006	7.72905	7.02318	6.35085
VIT_17s0000g06680	7.38991	6.74214	5.92458	6.91719	6.59266	6.34814
VIT_10s0116g01920	5.34495	5.92608	6.393	5.89918	5.76942	6.34725
VIT_15s0046g03520	7.68306	6.45713	6.4165	6.96694	6.95582	6.34648
VIT_09s0002g02970	-1	3.92884	5.48188	0	3.25046	6.34548
VIT_01s0010g01810	6.29069	5.61677	6.18368	5.82375	5.40042	6.34205
VIT_16s0039g02500	4.853	5.32709	6.12357	4.55008	5.32912	6.3411
VIT_09s0002g00640	4.16939	7.83162	7.05922	4.38059	7.45538	6.3405
VIT_14s0066g00710	-3.05889	7.45703	5.78276	6.90665	6.31892	6.33479
VIT_04s0008g06330	5.50398	6.79003	5.73471	6.20405	6.22149	6.3345
VIT_18s0072g00550	5.88281	7.84375	7.36714	5.63546	7.51554	6.33348
VIT_08s0056g01620	5.39803	6.0054	5.93946	5.44018	5.7473	6.33128
VIT_18s0001g09230	6.09761	7.10531	6.95826	5.89845	6.76487	6.3296
VIT_17s0000g00570	5.31143	6.09071	6.9855	5.66647	6.50123	6.329
VIT_04s0023g03230	3.49057	5.33485	4.3188	1.61824	4.40803	6.32685
VIT_14s0030g01680	5.50016	6.19705	6.91365	6.24146	6.63947	6.32169
VIT_13s0019g00040	5.53564	6.30931	6.37608	5.55111	6.49372	6.32073
VIT_05s0049g00470	4.39735	5.93593	6.20978	4.83424	6.03672	6.31331
VIT_05s0020g03190	4.25424	5.69683	7.83899	5.51665	7.27572	6.30955
VIT_01s0011g05650	3.78555	5.36095	5.87635	5.07895	5.48134	6.30591
VIT_02s0012g01170	4.75114	5.73164	6.62751	5.38151	5.87004	6.30554
VIT_05s0094g01110	5.33997	5.94501	6.40798	5.73037	6.17871	6.3025
VIT_08s0032g00800	3.9573	5.57642	6.28164	3.82273	5.60219	6.2997
VIT_11s0016g05480	6.10706	5.97774	6.8339	5.85458	6.7305	6.29896
VIT_16s0098g00720	4.21127	4.95031	5.66647	4.81865	5.40361	6.29805
VIT_01s0026g02280	5.39152	6.27879	6.2704	5.85192	6.67582	6.29646
VIT_18s0001g08910	4.44824	5.44117	5.92695	4.40531	5.82807	6.29112
VIT_07s0031g00060	8.58055	6.48521	6.62303	8.14851	6.77619	6.28466
VIT_14s0066g00410	5.0296	6.15462	4.39803	5.25676	5.13038	6.27947
VIT_04s0008g01120	5.62205	6.73277	6.55382	6.00098	6.41498	6.276
VIT_06s0009g02840	3.39735	5.37585	3.32289	4.21438	2.38957	6.2719
VIT_15s0046g00260	5.05947	5.72529	6.49894	5.71598	5.51107	6.26835
VIT_08s0040g03040	6.96721	6.00764	8.27001	6.50573	5.97713	6.26547
VIT_17s0000g08070	8.37842	7.19823	5.76977	7.79561	6.66011	6.26535
VIT_05s0077g00810	7.09177	6.41931	7.30958	6.57006	7.41585	6.26479
VIT_02s0012g02220	4.5061	5.20659	6.82964	6.32006	5.97108	6.26354
VIT_08s0058g00560	7.04388	6.97919	7.85397	6.85541	7.97686	6.26015
VIT_17s0000g04890	5.79589	5.52199	7.09494	5.9552	6.57041	6.25594
VIT_16s0022g01020	-1	4.45965	5.16979	-0.0588937	2.0368	6.25582
VIT_14s0068g00130	4.56682	4.92679	5.51686	4.58115	5.23266	6.2526
VIT_09s0002g05590	1.37666	3.86196	6.96959	1.68706	4.44272	6.25185
VIT_09s0002g03440	5.60851	5.77619	6.02746	5.0635	6.27209	6.25102
VIT_17s0000g06270	6.49052	5.30706	5.81113	6.36329	5.23048	6.25039
VIT_01s0010g03490	-1.57061	5.72846	6.57864	2.10545	6.61152	6.24888
VIT_17s0000g04210	-1.73697	7.04111	6.68346	6.22078	6.94693	6.24761
VIT_05s0077g01190	1.25096	7.73974	6.4069	2.45768	6.87766	6.2471
VIT_02s0012g00310	6.76425	5.34743	5.76509	6.6372	5.55602	6.24622
VIT_12s0034g01870	2.78869	5.85217	4.89417	3.16832	4.57652	6.24381
VIT_11s0052g00320	5.3296	6.43607	5.81061	5.51633	6.42716	6.24267
VIT_19s0085g00850	5.46423	6.00727	6.55801	5.61186	6.23879	6.24012
VIT_03s0063g01330	-3.05889	3.96932	10.7032	4.09339	5.1246	6.23936
VIT_18s0001g08290	5.32625	6.02459	6.54587	5.40179	6.06336	6.23879
VIT_11s0016g00280	5.86633	6.0786	7.13169	6.37092	7.23732	6.23834
VIT_05s0102g00090	5.50547	5.32721	5.98254	5.95544	4.77961	6.23726
VIT_14s0171g00130	7.07232	6.24552	6.23617	6.72406	7.65514	6.23719
VIT_16s0115g00340	5.30925	4.95171	5.23573	5.64731	4.19114	6.23643
VIT_06s0009g03450	6.14649	5.804	5.31058	6.17033	5.10866	6.23439
VIT_12s0059g01040	6.02451	5.97781	6.23311	5.21218	6.41757	6.23375
VIT_05s0077g01580	4.67676	5.29719	7.84149	5.97781	5.1823	6.23362
VIT_01s0011g05670	4.7126	6.37202	5.76359	5.01346	5.34317	6.23311
VIT_18s0001g09850	4.7627	7.12015	6.58241	4.96455	6.59674	6.2324
VIT_02s0025g01460	5.47184	6.04177	6.12942	5.32133	6.01822	6.22458
VIT_06s0061g00560	5.30025	5.74317	5.31554	6.57854	3.28145	6.2231
VIT_15s0048g01390	7.8077	5.74416	6.18183	7.56438	6.06142	6.22136
VIT_18s0001g11080	5.05297	5.87864	5.60664	4.92663	5.68986	6.21975
VIT_09s0018g02110	8.54487	6.96124	5.70754	8.30454	6.89845	6.21607
VIT_18s0001g07840	-1	6.44195	7.38065	2.98793	6.37753	6.216
VIT_13s0019g04710	5.73841	6.35397	6.07368	5.24539	6.07311	6.21555
VIT_16s0039g02700	3.94298	5.3799	5.64116	4.16216	5.36993	6.21484
VIT_02s0025g02760	5.2015	5.58706	6.66884	5.4714	6.49969	6.21458
VIT_13s0064g01110	4.57632	6.81177	8.33039	4.63846	8.08245	6.21393
VIT_07s0104g01250	5.18666	6.5097	6.95093	7.03687	7.89004	6.21263
VIT_18s0041g01350	6.74716	6.15083	5.5025	6.86794	6.40259	6.21231
VIT_07s0005g02110	5.49239	7.35218	6.93168	5.36329	6.78468	6.21004
VIT_17s0000g02480	5.11478	5.36189	6.00981	4.63304	5.75578	6.20913
VIT_02s0025g01450	2.9994	5.29805	5.18402	2.72465	4.63013	6.20867
VIT_04s0008g02390	4.95016	5.46815	5.77452	5.0268	5.80976	6.20802
VIT_08s0007g05080	5.49399	6.18375	6.35697	5.93907	6.33967	6.20594
VIT_14s0108g01420	7.22609	6.75613	6.2609	7.68335	6.84369	6.20451
VIT_18s0122g01350	6.6972	6.42162	5.25121	6.53247	5.52482	6.20255
VIT_18s0086g00710	4.75578	5.67835	6.02886	4.87201	6.01294	6.20222
VIT_05s0049g00040	4.73606	6.23987	4.21205	2.76553	3.99579	6.20124
VIT_05s0077g00620	7.2268	5.69877	6.56534	6.75995	6.77233	6.19581
VIT_09s0002g04330	6.89369	6.38537	6.79758	7.34299	6.78424	6.19522
VIT_08s0007g03560	0.184809	5.77197	6.73372	1.95977	6.07881	6.19233
VIT_10s0003g05720	5.35226	5.38807	6.19758	5.09029	6.07902	6.19088
VIT_16s0100g00400	1.47854	6.03056	6.94732	2.8312	6.4663	6.1891
VIT_03s0038g02310	6.36288	5.24628	5.36865	6.24349	5.14051	6.18903
VIT_11s0016g03180	4.99729	5.97797	6.21613	5.006	6.32984	6.18712
VIT_06s0004g01640	5.28034	6.33408	5.58075	4.87644	5.46641	6.18468
VIT_16s0050g00380	7.70743	6.15381	4.37712	6.7942	5.91225	6.18428
VIT_11s0016g03880	5.50356	5.94494	6.00518	4.98353	6.0069	6.18196
VIT_01s0010g01260	8.30556	6.6745	6.29884	9.05523	7.50563	6.1817
VIT_07s0129g01050	5.55039	6.90697	6.8806	6.99752	6.85715	6.18124
VIT_18s0001g00140	0.124328	8.19843	7.13883	3.11936	7.81946	6.18057
VIT_06s0061g00600	4.89045	3.87447	5.13299	4.59076	3.88003	6.18031
VIT_12s0057g00150	-0.234465	6.07168	6.7109	2.72828	4.52	6.17964
VIT_19s0014g03520	4.07838	5.51043	6.48258	5.08336	5.47065	6.17911
VIT_09s0002g07020	5.81258	6.62259	5.60871	6.17778	6.30852	6.17818
VIT_11s0052g00020	7.5981	6.52231	6.12226	7.26619	6.50727	6.17732
VIT_08s0040g02710	7.59467	5.93562	6.35415	6.95175	6.31131	6.17566
VIT_03s0038g01510	6.50795	6.98258	5.13914	6.38595	6.44333	6.17013
VIT_06s0004g06580	4.65992	6.13757	5.63178	4.47119	5.79736	6.16899
VIT_04s0210g00180	6.16819	6.03855	5.8382	5.32853	5.77882	6.16825
VIT_07s0151g00280	5.14078	6.29786	6.65172	5.38578	6.31331	6.16819
VIT_06s0080g00470	6.94759	5.93357	6.2103	7.03998	5.90344	6.16551
VIT_17s0000g08140	4.69674	5.35837	6.06939	4.99654	5.6373	6.16551
VIT_19s0177g00080	-1	7.7756	3.35238	4.78764	6.2812	6.16484
VIT_09s0002g03340	4.92853	4.32409	6.58195	5.67073	5.92204	6.16437
VIT_01s0010g03620	8.64232	7.10751	5.47444	9.10439	7.46728	6.16404
VIT_18s0001g02020	5.46194	6.51291	6.96667	5.41943	7.55198	6.15893
VIT_08s0007g03110	5.39575	5.98482	6.21036	5.4663	6.40837	6.15886
VIT_17s0000g05820	7.23084	6.26585	5.1918	7.1644	5.86476	6.15805
VIT_18s0001g11760	5.7919	5.20711	6.47832	5.82094	5.71708	6.15637
VIT_18s0041g01850	6.02148	5.87455	5.72973	5.34778	5.8339	6.15502
VIT_13s0067g01650	3.66562	5.01048	6.97085	4.2211	5.63285	6.15394
VIT_08s0007g05790	7.52157	7.35347	6.61048	6.44978	7.7429	6.15374
VIT_09s0002g08260	4.98884	5.81933	5.99737	5.72719	5.94071	6.15326
VIT_01s0127g00600	5.29168	6.64885	5.15002	5.88224	6.39438	6.15117
VIT_12s0059g01100	5.1592	5.62907	6.35385	5.38785	5.63295	6.15036
VIT_16s0050g00120	-3.37084	7.38939	6.34359	1.96224	6.80546	6.14988
VIT_13s0019g04140	7.95691	6.92382	4.95016	8.50044	7.40696	6.14418
VIT_05s0062g01180	5.31627	5.76235	6.15495	5.32085	6.09473	6.13901
VIT_18s0001g07380	3.77751	5.26379	6.48805	4.98246	6.27674	6.13689
VIT_18s0072g00080	6.24489	5.97529	6.42582	5.50864	6.69692	6.13641
VIT_09s0002g02400	5.67544	4.97591	5.82883	5.39974	5.20659	6.13573
VIT_14s0068g00680	7.71674	6.38082	5.67327	8.08405	6.45363	6.13559
VIT_14s0128g00370	5.87094	5.8312	6.81344	6.17606	6.25607	6.13491
VIT_14s0060g01760	7.49767	5.76323	6.12653	6.23898	5.99375	6.13429
VIT_13s0019g02250	5.97659	5.77224	5.95613	5.06767	6.07781	6.13381
VIT_10s0071g00890	4.06924	5.74757	4.91902	3.45637	4.48693	6.1323
VIT_11s0118g00230	6.13907	4.21878	5.54628	5.6893	4.90175	6.13066
VIT_12s0028g03800	6.10978	5.58676	6.44714	5.45867	6.47611	6.12942
VIT_10s0003g03250	7.53245	7.06874	5.0148	7.74153	6.67346	6.12928
VIT_07s0031g03090	5.305	6.0776	6.34501	5.58806	6.61809	6.12921
VIT_06s0080g00320	4.96378	5.45429	5.64923	4.23445	5.42201	6.12839
VIT_14s0108g00430	4.62566	5.91057	5.89998	4.34127	5.85591	6.12295
VIT_14s0030g00450	6.84369	6.40321	5.47519	7.42386	6.17832	6.11936
VIT_16s0050g02620	4.04963	6.75716	6.04279	5.23036	6.61775	6.11929
VIT_07s0129g00420	5.69479	6.63309	7.19895	7.22207	7.7919	6.11783
VIT_17s0000g07200	7.44319	7.24919	6.01837	7.22509	6.35913	6.11756
VIT_07s0005g05400	-5.90689	7.39318	5.9465	6.42978	6.56428	6.11714
VIT_11s0037g00420	7.89014	6.41182	6.14037	7.33095	6.6604	6.11673
VIT_18s0001g02690	2.74846	6.826	6.77325	4.20163	6.8206	6.11631
VIT_08s0007g01540	5.35849	6.20464	6.1639	5.49442	5.82765	6.1152
VIT_04s0008g00180	4.83693	4.68332	7.42347	4.38727	6.79684	6.11458
VIT_14s0068g01870	6.69822	6.16531	5.81481	7.16561	5.91767	6.11228
VIT_18s0001g06950	3.94579	6.3336	6.12701	3.90721	5.72165	6.11089
VIT_04s0008g06640	7.79827	5.64741	6.35268	7.03067	6.51749	6.11041
VIT_10s0003g00540	4.96162	6.12564	5.7201	5.00345	5.73814	6.10755
VIT_02s0025g01700	4.67638	5.96732	6.36183	4.96363	5.94259	6.10706
VIT_12s0028g01080	8.15237	6.8285	5.15933	8.74259	7.17981	6.10504
VIT_08s0007g07880	3.53522	5.72237	5.7438	3.96409	5.39723	6.10448
VIT_06s0009g00690	6.02835	6.33372	6.21968	5.44162	7.37926	6.10399
VIT_12s0028g00920	1.48371	6.39889	7.21839	3.44493	6.50043	6.10364
VIT_01s0011g04620	5.0051	4.80667	5.49931	4.51602	5.62702	6.10315
VIT_04s0044g00130	3.18639	5.82773	5.61432	4.28367	6.34086	6.10273
VIT_18s0001g10810	4.13914	5.02503	5.95706	4.37202	4.64463	6.09747
VIT_08s0007g07450	5.30634	5.60605	6.16095	5.5043	5.95497	6.09494
VIT_19s0014g00960	2.67054	4.42738	4.53211	2.59455	3.56234	6.09494
VIT_02s0025g04730	-3.37084	5.5507	4.64232	0.124328	3.85333	6.09466
VIT_08s0040g01850	5.5601	6.01629	6.1102	5.18573	5.329	6.08845
VIT_17s0000g01160	2.80804	5.8119	6.25676	3.11437	6.92497	6.08803
VIT_04s0008g01580	4.12681	6.83141	6.00383	4.44405	7.17376	6.08555
VIT_06s0004g06010	4.68201	7.06034	6.32499	4.96532	6.33271	6.0852
VIT_06s0080g00930	4.9214	5.76332	6.56031	5.1095	6.2292	6.08463
VIT_16s0039g02780	5.41583	5.88728	6.24837	5.72919	5.65688	6.08449
VIT_08s0040g00390	7.73161	6.26885	5.60437	7.81038	6.5257	6.08406
VIT_06s0004g04920	5.256	5.57723	6.17279	4.9899	6.17852	6.07988
VIT_18s0076g00330	5.10559	5.98504	6.0217	5.54844	5.89061	6.07938
VIT_12s0057g00600	7.0492	6.41374	5.84273	7.0649	6.06896	6.07831
VIT_14s0060g02390	5.00615	5.47919	6.77676	3.87217	6.07575	6.07717
VIT_02s0025g03510	4.77663	6.57632	6.25254	5.34483	6.36001	6.07446
VIT_18s0001g14040	9.18817	6.80671	5.83407	8.11653	6.988	6.07439
VIT_11s0016g04990	4.63207	5.74057	6.63018	4.36294	6.17592	6.07189
VIT_05s0020g04680	7.71452	5.6984	6.18606	7.80071	4.94642	6.07125
VIT_11s0118g00650	4.62955	5.54823	3.50504	4.30524	3.65535	6.0696
VIT_06s0004g04390	7.24685	6.28627	5.94618	6.48736	6.71781	6.0691
VIT_06s0004g05090	5.972	6.94052	6.63377	5.61559	6.67873	6.0691
VIT_04s0008g00520	4.37666	5.20072	6.34441	4.69525	4.90833	6.06846
VIT_09s0002g04480	5.43095	5.9942	6.1286	5.32205	6.62639	6.06731
VIT_02s0025g01500	4.62955	5.11977	6.24114	5.59485	5.76598	6.06724
VIT_08s0007g00480	5.5405	5.58145	6.48548	5.74012	6.38962	6.06709
VIT_13s0019g05250	5.05514	5.52909	6.35544	5.72201	5.99277	6.06587
VIT_04s0008g01590	2.24184	7.6322	7.29951	4.81967	8.29675	6.06487
VIT_12s0059g01800	3.73299	4.44846	5.81907	3.99488	5.17326	6.06465
VIT_18s0001g15050	5.2101	5.75622	6.52225	5.99533	6.23042	6.06206
VIT_18s0164g00030	6.83845	5.86806	6.40973	7.4231	6.65616	6.06192
VIT_06s0004g02650	7.29303	5.94071	7.16064	8.5229	7.96423	6.06127
VIT_18s0001g12510	5.59544	5.38001	5.03328	5.37631	5.35473	6.06034
VIT_10s0116g01540	7.27501	5.61638	5.28034	6.89377	5.36107	6.05615
VIT_05s0049g01500	5.79199	5.76377	4.7301	5.0648	4.34056	6.05615
VIT_15s0046g02480	5.53864	5.66126	6.25393	5.37816	6.26785	6.05586
VIT_06s0009g02920	3.03914	5.00779	2.6151	3.96594	1.80047	6.05478
VIT_12s0028g03900	3.73516	5.74138	6.30895	4.25349	6.09402	6.05355
VIT_06s0004g00570	5.36177	5.23279	5.73615	5.48285	4.66884	6.05326
VIT_18s0001g07360	3.73444	5.34932	6.08767	3.97514	5.52784	6.05246
VIT_03s0180g00080	5.38888	5.61677	5.91576	5.10643	5.40099	6.04941
VIT_02s0154g00320	10.0341	7.65373	7.88848	9.47352	9.11051	6.04767
VIT_10s0003g03950	5.03225	4.80907	6.89829	4.92821	5.21179	6.04243
VIT_18s0001g06410	7.38727	6.08866	5.77153	6.87856	5.76456	6.04089
VIT_11s0016g05560	5.20451	5.90352	5.49665	4.91823	5.76235	6.04031
VIT_07s0005g06420	7.08108	6.57844	5.59842	6.7804	6.32589	6.03987
VIT_06s0080g00450	5.41357	5.96324	7.1964	5.23828	7.31373	6.03738
VIT_13s0067g02570	7.20923	6.03746	5.48091	6.38042	6.05115	6.03738
VIT_17s0000g00030	5.14527	5.16645	5.69905	4.6402	5.55592	6.0357
VIT_04s0008g01660	4.82917	5.36492	6.49767	5.65105	5.6791	6.03482
VIT_07s0031g02240	5.92021	5.97476	7.26626	5.27674	7.52933	6.0321
VIT_03s0038g04760	4.82324	5.12653	3.76058	4.88069	2.9222	6.03063
VIT_04s0008g05470	7.02794	4.82934	5.99284	7.21046	5.65507	6.0285
VIT_18s0072g00370	5.93026	6.73877	6.24171	6.06645	6.95179	6.02687
VIT_05s0020g02530	6.19548	6.11041	6.23764	5.64174	6.51958	6.02555
VIT_19s0015g01200	5.24463	6.29762	4.68967	5.38727	5.30925	6.02422
VIT_08s0007g05370	5.36516	5.72928	6.37597	6.19961	6.34252	6.02385
VIT_18s0122g01340	3.70929	5.6154	6.07039	4.628	5.75346	6.01421
VIT_19s0014g02770	4.06666	5.36107	5.46978	4.2989	5.30816	6.01398
VIT_01s0026g00570	9.03393	3.54514	4.62858	6.92465	2.98368	6.01249
VIT_03s0038g04450	7.41771	6.09866	5.07909	6.84846	6.04571	6.01212
VIT_06s0004g07430	5.27227	5.64808	6.2433	5.37109	5.99646	6.011
VIT_07s0031g01630	5.66742	5.98504	6.23847	4.48907	6.52393	6.01033
VIT_12s0035g02180	9.49206	6.47243	5.72638	8.78117	6.36632	6.00622
VIT_06s0004g06080	5.99571	5.40065	5.45385	6.68967	6.88992	6.00525
VIT_01s0011g04810	4.40213	6.0497	5.73091	4.77294	5.51486	6.00443
VIT_14s0068g00110	3.75702	4.4794	4.96886	3.93011	4.61628	6.00158
VIT_05s0077g00610	6.04738	7.21539	5.45022	5.9036	6.84695	6.00045
VIT_14s0171g00360	-1.20645	6.10448	5.79034	2.13969	5.56275	5.9988
VIT_06s0004g08440	5.16631	5.29841	6.34501	3.85266	6.14309	5.99759
VIT_11s0052g01800	7.00131	5.28885	6.6604	7.25027	6.44521	5.99654
VIT_11s0016g01940	7.47868	6.5007	6.07739	6.96012	6.46717	5.99413
VIT_18s0001g10470	5.25336	4.78311	6.44554	5.3814	6.09887	5.99027
VIT_14s0036g00520	7.37365	6.27811	6.09381	6.97919	6.15711	5.9902
VIT_10s0003g04350	8.14209	6.56382	4.69525	8.43132	6.66628	5.98959
VIT_04s0044g00280	5.14132	5.59425	6.43162	6.10126	6.20679	5.98868
VIT_13s0064g00910	-5.22882	7.12433	8.42724	5.40293	7.37998	5.98664
VIT_04s0043g00360	4.30719	5.55244	5.43585	4.55295	5.13134	5.9858
VIT_18s0001g00510	5.30293	5.7403	5.51675	5.16135	5.79693	5.98573
VIT_11s0016g04060	5.07168	5.45297	6.20841	5.19889	5.78982	5.98512
VIT_11s0052g00380	0	7.30989	4.51937	3.83255	5.99586	5.98003
VIT_18s0166g00180	6.16598	5.86113	5.85042	5.97353	5.046	5.97949
VIT_06s0004g00410	7.22275	5.7515	4.89692	6.91839	5.63217	5.97934
VIT_06s0004g05890	7.20307	6.13744	5.73326	6.86154	5.90408	5.97896
VIT_19s0085g00520	6.05376	6.85827	5.70155	6.54756	6.05326	5.97591
VIT_19s0015g00540	-1.35845	7.98887	-2.90689	0.193246	6.05202	5.97468
VIT_05s0062g00890	4.90977	5.45889	6.03599	5.21179	5.61196	5.97331
VIT_05s0020g03970	5.89845	6.58045	3.85931	6.66088	6.81967	5.97223
VIT_12s0028g01120	7.77538	6.23688	6.01777	7.44904	6.4872	5.97208
VIT_02s0025g03590	6.93243	6.90087	4.73787	7.18986	6.13716	5.97047
VIT_17s0000g01700	3.88232	5.65573	4.78276	3.91233	4.85881	5.96394
VIT_12s0142g00130	6.84804	5.54761	5.65392	6.49772	5.96632	5.95722
VIT_03s0038g02190	5.01866	5.44615	4.62508	4.99201	4.88297	5.95722
VIT_12s0028g03700	4.04469	5.31034	6.17006	4.10573	5.69757	5.95699
VIT_19s0085g00880	7.80301	7.03427	6.666	9.07185	7.48086	5.9552
VIT_16s0039g02270	5.40338	6.25317	6.16966	6.2497	6.20255	5.95458
VIT_14s0060g00230	6.26416	5.08435	7.25805	5.40996	6.22381	5.95427
VIT_07s0151g00630	-1	7.11579	5.96725	6.03833	6.93754	5.95241
VIT_08s0007g04780	8.3034	6.74739	3.43652	7.43591	6.54004	5.95241
VIT_14s0108g01280	5.69803	5.83221	6.59131	6.17439	6.02901	5.95062
VIT_12s0035g02100	-4.42146	7.45535	7.93644	2.60723	7.63952	5.9479
VIT_17s0000g03990	7.6569	7.41653	3.93389	6.46608	6.07275	5.94782
VIT_09s0002g06970	3.59733	5.05644	6.17139	4.26228	4.50059	5.94774
VIT_04s0023g03890	-1	6.95424	6.76664	2.10657	6.4121	5.94517
VIT_17s0000g08220	4.9152	5.38463	6.13812	5.21036	5.70183	5.94462
VIT_14s0036g00420	5.78162	6.04651	5.72819	5.46227	6.57667	5.94306
VIT_15s0024g00800	6.43602	5.63324	5.62332	5.41549	5.65793	5.93664
VIT_12s0059g02360	5.69051	5.75845	5.62352	5.52335	4.47876	5.93562
VIT_05s0062g00900	4.67374	5.96563	6.2249	5.10252	5.97774	5.93184
VIT_16s0098g01780	4.71039	5.77917	5.73245	4.55745	4.99095	5.93129
VIT_04s0023g02420	5.20059	5.08179	5.94673	5.26078	6.19777	5.93066
VIT_18s0001g02740	8.02181	6.29689	5.74389	8.14163	6.64971	5.92869
VIT_13s0158g00370	6.50906	5.18428	5.58626	6.31603	5.4192	5.92853
VIT_14s0219g00110	3.99035	5.39358	5.54381	3.9241	4.82511	5.92624
VIT_07s0191g00050	5.48789	5.87373	4.7703	5.51223	5.38128	5.9237
VIT_06s0004g02400	6.44504	5.48446	6.36976	7.18501	6.32637	5.92355
VIT_16s0039g01650	7.56331	6.16263	5.58716	7.08644	6.17566	5.92244
VIT_18s0001g02420	4.62176	5.16404	6.58666	4.27724	6.37597	5.92172
VIT_02s0033g01380	4.96625	4.96347	6.2666	3.64539	4.7604	5.92156
VIT_02s0241g00080	5.58716	6.1598	6.53294	6.08881	6.62044	5.92101
VIT_19s0014g05090	5.49046	5.43718	5.54319	5.87578	4.95822	5.92061
VIT_04s0023g02900	4.33771	3.99307	6.4108	5.01406	5.97422	5.91934
VIT_04s0008g06660	-1	6.72114	6.78062	2.71223	7.33902	5.91926
VIT_05s0020g03020	5.41335	5.88631	6.37874	5.65411	6.3293	5.91878
VIT_07s0005g01350	3.8859	4.7045	6.07568	4.41165	3.25802	5.91862
VIT_09s0018g01540	5.34021	5.24133	6.14085	5.07425	5.76323	5.91719
VIT_06s0061g00230	6.61912	4.87004	5.62537	5.66002	4.52335	5.91544
VIT_14s0081g00500	7.01253	6.48403	5.49121	7.44416	5.94759	5.9152
VIT_16s0098g00760	5.66562	5.82307	6.34353	5.43073	6.43813	5.91433
VIT_15s0021g00940	6.80894	5.78101	5.62254	6.91644	4.59852	5.91329
VIT_13s0019g03280	7.21739	5.27177	5.7034	6.33271	5.8301	5.91153
VIT_18s0001g09250	5.63508	6.96517	4.48478	6.43851	6.30475	5.90456
VIT_12s0055g00420	4.58496	5.8429	6.01926	5.32097	5.73615	5.90424
VIT_12s0028g00590	6.00869	5.70478	4.94158	5.02399	4.90961	5.89926
VIT_05s0077g01930	-5.05889	7.89445	2.25197	8.98743	6.18276	5.89805
VIT_17s0000g04050	4.99533	4.83525	5.43274	4.94001	5.45812	5.89563
VIT_16s0100g00290	9.58082	6.70413	7.08034	10.0023	7.73839	5.89514
VIT_04s0023g03100	4.27625	5.92552	5.58806	4.54967	5.61922	5.89077
VIT_03s0017g01450	4.35426	5.26053	7.34545	3.81796	7.14238	5.89069
VIT_15s0046g00240	4.80787	5.25575	5.08958	4.88736	5.74971	5.88777
VIT_14s0108g01330	6.10706	6.31022	5.2755	6.1152	5.85083	5.88679
VIT_03s0063g00480	5.4638	6.37202	5.90456	5.42167	6.0237	5.88655
VIT_13s0019g04390	6.022	6.59281	6.76915	5.70127	7.1855	5.88541
VIT_14s0068g01950	6.08328	5.59026	5.8131	6.82828	5.7147	5.88395
VIT_03s0091g00470	5.06192	6.4829	6.39152	4.65992	6.4353	5.88264
VIT_14s0128g00360	5.30743	6.07916	5.89417	5.4353	6.03239	5.88044
VIT_04s0069g00790	4.81711	4.98003	4.92616	5.08491	3.83154	5.87995
VIT_18s0001g05440	4.62644	5.84616	5.85591	5.45396	6.22362	5.87905
VIT_14s0060g02070	7.18236	5.71039	5.60743	6.74537	6.05839	5.87864
VIT_05s0020g00330	-5.90689	4.71644	4.14541	0.0658021	3.75346	5.87627
VIT_07s0191g00070	5.58676	5.6997	5.11117	4.51707	5.3986	5.8757
VIT_08s0058g01040	5.29254	6.02466	5.02074	5.20711	5.22497	5.87512
VIT_18s0001g07210	7.74967	6.69339	6.55964	7.34542	6.84812	5.87472
VIT_01s0011g03540	7.62129	6.69674	5.44449	7.7966	5.96625	5.87406
VIT_18s0001g00560	4.69896	5.64962	5.12818	4.37805	5.29609	5.87365
VIT_14s0066g01190	3.75061	6.03085	6.66614	3.91488	5.24273	5.87152
VIT_02s0012g02790	6.33515	5.01941	6.57828	6.29505	6.18917	5.87143
VIT_15s0048g02010	4.88264	5.52105	6.17612	5.38497	6.00921	5.87127
VIT_17s0000g03820	6.42867	5.91153	4.52084	5.27625	4.28983	5.86921
VIT_19s0090g01610	5.49196	4.87954	4.96286	5.29389	4.75951	5.86856
VIT_01s0026g01570	6.98974	5.24653	5.73127	6.92438	5.72183	5.8674
VIT_19s0014g05200	4.75489	5.50885	5.60259	4.91472	5.71205	5.86666
VIT_08s0007g07690	4.77943	6.17233	8.16897	4.64251	5.99133	5.86518
VIT_19s0014g01780	2.20477	4.72738	5.84783	3.38359	6.32115	5.86427
VIT_08s0007g01300	6.91616	5.63217	5.64222	6.94798	6.48714	5.86369
VIT_05s0077g01750	5.61412	4.84298	4.62293	5.36422	4.94095	5.86196
VIT_19s0014g00980	7.09564	6.51827	5.34944	7.13979	6.49942	5.8608
VIT_02s0025g02410	5.58075	4.72447	5.56844	5.13709	6.12605	5.85856
VIT_01s0244g00170	7.12098	5.03269	4.34577	6.20268	4.56234	5.85815
VIT_13s0064g00920	5.70192	4.4714	5.60782	5.27687	5.01733	5.85607
VIT_04s0044g01860	3.10936	5.00255	6.26535	4.24818	5.82993	5.85491
VIT_04s0008g01300	6.90785	6.04643	6.06881	7.49396	6.52612	5.85483
VIT_04s0008g07340	7.62112	6.02311	6.67407	7.65549	6.07175	5.85308
VIT_09s0002g06810	5.16631	5.86551	6.77474	5.8535	5.96817	5.8515
VIT_11s0037g00390	4.71351	5.53097	5.88387	4.85516	5.72719	5.85017
VIT_03s0038g02170	7.66846	5.77189	5.01881	6.16611	5.6094	5.84983
VIT_06s0009g02110	4.57914	4.19849	4.73281	5.2075	5.33307	5.84967
VIT_02s0025g03220	5.17006	5.6972	6.17266	5.44626	6.39518	5.84958
VIT_03s0038g04500	6.16464	5.53812	5.28774	6.62605	5.47444	5.84816
VIT_01s0026g01250	0.00958605	5.3308	5.84599	1.5737	3.48242	5.84716
VIT_08s0007g08840	0.963474	6.43051	7.53564	2.96532	6.7612	5.84691
VIT_19s0014g01740	4.83491	3.853	5.74461	4.47573	5.17366	5.84641
VIT_17s0000g09130	5.72347	5.7754	6.49212	5.6641	6.55367	5.84549
VIT_08s0007g04190	5.26416	5.88492	6.59912	5.41886	6.24989	5.84507
VIT_09s0070g00140	4.06494	5.18256	6.0042	4.89982	4.4991	5.84432
VIT_09s0054g01690	5.14988	4.54061	5.21464	4.22779	4.96517	5.84013
VIT_12s0059g02510	4.02886	5.14866	5.23509	3.34861	3.81558	5.83962
VIT_19s0085g01100	5.37063	5.35226	5.87258	5.05355	5.76385	5.83441
VIT_14s0108g01520	5.14948	4.9514	6.256	4.69655	5.87799	5.83407
VIT_11s0016g02790	7.17994	6.853	6.32607	7.59574	6.46744	5.82951
VIT_09s0002g03460	6.29793	4.59554	4.95992	7.05943	4.77206	5.82841
VIT_05s0020g00640	6.46003	5.55653	6.55392	6.38491	6.73132	5.82773
VIT_02s0025g02470	4.78293	5.0869	5.60782	5.01569	4.66657	5.82706
VIT_04s0008g05820	5.09325	5.59783	5.76571	4.87578	5.48188	5.82604
VIT_05s0094g01530	6.93483	5.17086	6.51728	6.63067	6.22721	5.82366
VIT_17s0000g07210	7.22281	6.91476	5.65076	6.94435	5.91807	5.82256
VIT_14s0030g01470	-1	7.29768	6.78673	1.60565	6.46123	5.82103
VIT_01s0011g01050	6.46918	5.71809	5.4174	6.91397	5.19272	5.81958
VIT_06s0004g03620	4.81626	5.69293	6.56301	5.14907	6.39843	5.81907
VIT_11s0118g00350	9.17701	5.67309	4.38428	6.11666	5.66315	5.81805
VIT_08s0007g04250	-5.64386	6.65191	4.39415	2.91201	5.72674	5.81728
VIT_17s0000g08000	7.09364	6.20477	5.34151	6.77724	6.0864	5.81532
VIT_04s0023g03600	5.27612	5.32205	6.50255	5.11464	4.79874	5.81352
VIT_13s0067g01990	5.4238	5.98542	6.32655	5.83685	6.40042	5.8131
VIT_14s0108g01190	2.99337	6.41763	3.94111	4.89772	5.50059	5.81139
VIT_01s0127g00590	4.4714	6.27345	5.74174	5.47595	6.21451	5.81121
VIT_07s0031g02560	6.82697	5.3784	5.51117	6.8804	5.44526	5.80993
VIT_06s0061g01230	8.03762	6.78162	4.95482	7.85974	6.63149	5.80735
VIT_17s0000g01920	4.53916	5.37214	5.73751	5.04396	5.34861	5.80735
VIT_04s0044g01560	4.70782	4.67487	4.44493	5.1631	5.03899	5.8065
VIT_06s0004g04180	3.21826	6.758	7.64695	3.15866	5.90481	5.80615
VIT_11s0016g03890	4.89934	5.72719	6.0521	5.28479	6.0941	5.80426
VIT_19s0014g01580	6.36521	5.93577	6.01629	6.4808	5.15623	5.80116
VIT_18s0001g11600	4.9607	4.65287	3.91966	3.26203	2.96409	5.79969
VIT_07s0129g00110	5.70099	6.33324	6.34258	4.75114	6.92244	5.79891
VIT_13s0084g00830	4.35262	4.99005	5.63914	4.42268	5.25399	5.79788
VIT_05s0020g02600	5.20568	5.68463	6.14527	5.70865	6.08108	5.79623
VIT_16s0039g01420	7.67711	6.55223	6.80684	6.51575	7.18729	5.79398
VIT_04s0008g03680	5.83036	5.14608	5.09085	4.6092	4.49804	5.79199
VIT_03s0038g00230	4.7588	5.52753	5.46194	4.74452	5.82672	5.78773
VIT_05s0077g01310	1.5737	5.17526	7.02492	3.30889	5.5599	5.78738
VIT_04s0023g03910	-1.70526	6.67591	6.51207	1.62605	5.72783	5.78651
VIT_11s0118g00590	7.42498	6.21212	5.77268	7.27501	6.21484	5.78372
VIT_10s0597g00010	-1.2863	7.62688	5.88712	7.63945	7.22959	5.78293
VIT_04s0023g02280	0.254997	4.48414	6.83727	2.13203	6.15036	5.7818
VIT_01s0011g05790	6.96882	5.68753	6.15745	6.47146	6.18004	5.78162
VIT_04s0023g03240	4.55377	5.08392	4.36387	4.45483	4.95699	5.78127
VIT_06s0080g00810	5.57582	4.97835	6.32649	6.91636	5.29315	5.77593
VIT_06s0004g01750	7.79162	4.99744	5.44305	6.54597	5.15947	5.77505
VIT_17s0000g07920	5.64078	5.33771	6.40003	6.40769	6.11638	5.77461
VIT_17s0000g05530	5.16779	6.00742	6.02739	4.99759	5.92481	5.77233
VIT_07s0005g03400	-1	7.72069	4.17446	1.26704	6.90436	5.77215
VIT_12s0028g03340	4.68407	5.62449	6.02908	5.59425	5.65716	5.77056
VIT_05s0049g01470	6.18474	5.54741	5.14445	5.04104	5.01003	5.77048
VIT_18s0001g09010	-0.173536	6.84541	4.9905	2.62916	5.45943	5.76765
VIT_06s0080g01090	7.25383	7.27321	6.99375	7.36833	7.36984	5.76757
VIT_14s0006g01530	5.74317	4.31759	4.80047	5.86691	4.90352	5.76668
VIT_14s0128g00790	4.79546	4.83979	3.88817	3.26754	3.18269	5.76571
VIT_03s0180g00180	5.33044	5.58426	4.74488	4.61353	4.44095	5.76465
VIT_05s0062g00760	4.66429	5.58326	6.1323	4.15326	6.08958	5.76261
VIT_13s0064g00440	7.83649	6.16738	5.62078	6.97047	6.06206	5.76066
VIT_08s0040g03060	4.89805	6.29162	5.33485	4.84566	5.63062	5.75942
VIT_18s0041g01230	4.26629	6.26347	5.70929	5.23343	6.18203	5.75613
VIT_16s0100g00300	5.29744	6.37851	7.08587	7.27131	6.90002	5.75141
VIT_04s0023g02820	4.0917	5.4027	5.23279	5.03899	5.53564	5.75079
VIT_04s0008g00800	4.92837	6.09901	5.9003	4.66088	6.24894	5.74882
VIT_19s0014g02390	5.75221	5.86336	4.96701	4.92821	6.14975	5.74497
VIT_09s0002g04580	-0.592194	4.8371	5.90143	0.826464	4.42537	5.74434
VIT_09s0002g07920	7.34379	5.80632	4.90304	6.03797	5.30585	5.74416
VIT_14s0108g01020	8.62203	5.45363	5.87652	7.95952	6.90937	5.74326
VIT_05s0094g01590	3.88199	7.20884	7.00154	3.71955	6.22001	5.74237
VIT_03s0063g00680	4.55295	5.49591	5.73127	5.20763	6.23719	5.74228
VIT_16s0039g02020	5.91791	6.68734	6.7544	5.05557	7.04818	5.73931
VIT_17s0000g05630	7.79042	5.89045	5.83971	8.01387	6.48618	5.73877
VIT_14s0030g02170	5.63091	4.16591	5.65363	5.70819	5.05441	5.73697
VIT_13s0047g00010	3.37851	5.8932	4.43763	3.13258	4.82307	5.73326
VIT_01s0026g00980	4.90865	6.79342	7.32948	4.30475	7.13614	5.732
VIT_18s0089g00610	6.39089	5.61019	4.83356	6.22117	5.14023	5.73191
VIT_08s0040g01340	0.111031	7.52797	6.12502	1.48371	6.13511	5.73182
VIT_08s0056g00180	3.62098	4.84733	5.93695	4.72865	5.19705	5.73182
VIT_19s0014g05430	6.11977	7.15778	7.244	5.60575	7.63186	5.73164
VIT_02s0012g01320	7.11294	6.71914	6.27811	7.23202	6.94942	5.73064
VIT_04s0023g03470	5.62108	4.56864	6.87754	5.86567	6.13155	5.73064
VIT_19s0090g01740	5.12791	6.0521	6.14975	5.16041	6.07575	5.72274
VIT_03s0091g00310	5.38842	5.50843	3.46771	5.5599	3.64693	5.72092
VIT_08s0056g00150	6.69956	5.65983	5.50271	6.38324	5.83002	5.72055
VIT_07s0005g02710	5.60713	4.93404	3.93011	1.94985	2.37851	5.71982
VIT_15s0021g02720	4.77136	4.14269	5.00315	4.4069	4.92299	5.71918
VIT_18s0122g00950	6.23029	5.87201	5.24057	6.65	5.5347	5.71754
VIT_17s0000g06360	4.45812	7.38316	7.42204	6.21536	7.49372	5.71516
VIT_05s0051g00910	5.28219	4.64366	5.7271	4.85881	5.8034	5.71516
VIT_18s0001g12840	4.4822	5.66097	5.68949	3.99337	6.12329	5.71415
VIT_05s0020g03890	7.17276	6.10392	5.30061	7.07478	5.97812	5.71342
VIT_07s0151g00800	4.39917	4.38036	4.92726	5.19679	4.59355	5.71113
VIT_14s0108g00450	-0.952694	6.46929	5.57823	3.29915	5.45407	5.7103
VIT_03s0017g01460	3.35567	5.77241	5.74586	3.4807	5.7515	5.70947
VIT_04s0008g05300	7.08555	5.21852	5.23777	5.88175	5.23777	5.70662
VIT_10s0003g00300	6.44962	5.287	5.20971	6.51644	5.56112	5.70579
VIT_17s0000g02290	5.75391	5.33283	4.63188	5.67139	4.24818	5.70072
VIT_10s0003g03830	7.39215	6.26479	5.74748	7.86458	6.16926	5.69683
VIT_02s0109g00230	4.32217	5.71489	4.81609	4.21438	5.91073	5.69627
VIT_10s0071g01160	6.44245	5.10112	5.67741	6.48586	5.3308	5.6959
VIT_14s0128g00780	4.92426	4.89271	3.88947	3.62683	3.27749	5.69534
VIT_08s0040g01270	5.03665	5.59525	5.59604	4.8859	5.75248	5.69497
VIT_18s0001g12130	6.73706	5.61628	5.41763	5.77487	5.69599	5.69442
VIT_14s0036g01060	6.01398	5.96054	4.23624	5.91385	5.38301	5.69358
VIT_01s0137g00550	3.44007	6.29872	4.95652	5.22085	6.17486	5.69339
VIT_09s0002g04850	-2.90689	8.1998	-4.32193	8.26014	5.14554	5.69256
VIT_12s0059g01380	8.32158	4.86196	2.36457	7.85721	3.256	5.68995
VIT_04s0008g02850	6.05441	5.58095	5.07425	5.70035	4.62488	5.68977
VIT_13s0019g05080	5.06278	5.37411	5.89563	5.14608	5.50504	5.68706
VIT_02s0025g04340	-1.96203	4.58316	6.41137	2.12102	5.43585	5.68669
VIT_11s0037g00950	6.56173	6.63851	4.73841	5.4304	5.30573	5.68398
VIT_13s0067g02300	-3.09954	5.81113	6.29069	5.13627	4.0036	5.68229
VIT_13s0064g01270	3.44978	5.08987	6.62395	4.88199	6.44978	5.68107
VIT_18s0122g00600	4.8089	5.39621	6.00338	5.44162	5.85989	5.67986
VIT_08s0058g00650	-0.577767	7.37463	7.96211	3.35943	7.38281	5.6777
VIT_02s0236g00130	5.65468	6.11853	4.91902	6.12529	6.14303	5.6761
VIT_06s0009g02880	2.58656	4.59793	2.6009	2.89336	1.90304	5.67177
VIT_12s0028g03600	6.66391	5.38255	5.61775	6.58115	5.45418	5.66959
VIT_08s0007g00740	5.41007	6.30864	5.82103	5.56082	6.07396	5.66893
VIT_04s0008g04220	4.6544	5.37051	5.61412	4.83036	5.65172	5.6677
VIT_01s0026g01060	4.77856	4.88931	5.22458	4.86129	5.44383	5.66685
VIT_11s0016g03560	4.66011	5.7069	3.85333	5.80761	5.22407	5.66581
VIT_04s0008g05810	6.76097	6.31282	6.83778	7.42271	6.9224	5.66562
VIT_02s0025g00500	-1.22882	4.91982	5.93515	1.23266	4.08009	5.66477
VIT_11s0016g00780	5.54916	5.34199	7.48805	7.43204	7.51149	5.66259
VIT_19s0014g02240	5.75702	6.58441	5.68295	5.50885	6.32331	5.65926
VIT_11s0016g00810	5.35919	4.59276	5.21283	4.83962	5.09831	5.65916
VIT_16s0098g00690	4.03914	4.88101	5.28725	4.60624	5.16725	5.6584
VIT_18s0122g00630	4.20529	5.1188	5.96594	5.08803	5.29376	5.65535
VIT_08s0040g02400	4.37086	5.52419	5.95241	5.64722	5.73679	5.65306
VIT_09s0002g00150	7.01417	5.55193	6.04388	6.42251	6.40003	5.65287
VIT_12s0059g02280	4.00929	3.68519	4.76677	4.77329	3.77329	5.64827
VIT_08s0007g02560	4.2019	5.59086	5.89651	3.24438	3.71626	5.64818
VIT_06s0004g07110	6.37278	6.11776	6.31856	6.91755	6.39826	5.64722
VIT_06s0004g04530	5.20372	5.1981	6.08732	5.09043	6.21088	5.64434
VIT_17s0000g07190	3.49057	7.0594	5.81958	4.32265	6.82557	5.64203
VIT_15s0046g00170	6.92699	7.08775	1.44714	6.21833	5.92355	5.64058
VIT_10s0116g01700	5.03548	5.24666	4.97835	4.54226	4.52273	5.63479
VIT_19s0093g00310	5.85017	6.15198	6.4404	6.86542	6.42554	5.63401
VIT_08s0032g00930	7.94371	6.12832	6.13525	6.66751	6.63914	5.63333
VIT_12s0057g00170	-0.0995357	5.43674	6.41064	2.75489	4.08321	5.63237
VIT_13s0019g04740	5.49665	5.54391	5.42794	5.29487	4.69004	5.63217
VIT_02s0012g00630	4.88899	5.11228	5.66391	4.78938	5.38463	5.6311
VIT_03s0038g03040	4.87529	4.29768	5.71452	5.83221	5.24514	5.62994
ENSRNA049462374	7.45379	5.74353	7.38284	8.83748	8.09701	5.62916
VIT_05s0094g00750	5.03342	5.81352	5.30268	6.28275	5.43518	5.62741
VIT_13s0019g05100	4.01555	4.85964	4.40122	4.32984	3.82069	5.62488
VIT_15s0046g01990	7.32897	5.84415	6.01085	7.56168	6.06494	5.6242
VIT_05s0062g01270	6.03416	4.18004	5.45154	5.96794	5.15799	5.62205
VIT_12s0034g01860	7.16645	5.99292	5.56061	7.06145	6.05514	5.6199
VIT_07s0031g01600	6.05405	5.1557	5.22818	7.09768	5.98102	5.61961
VIT_10s0042g00960	3.09817	4.57914	5.49121	4.05311	4.92837	5.61922
VIT_04s0043g00160	4.85665	5.344	5.5437	3.55745	5.74335	5.61794
VIT_07s0151g00840	1.03328	6.30195	6.399	1.852	6.20945	5.6152
VIT_05s0020g04610	4.30937	4.57934	5.46989	4.48156	5.62624	5.61353
VIT_04s0023g00790	5.37701	5.11562	4.79995	5.65669	4.60288	5.61068
VIT_16s0098g00900	6.51075	4.87496	5.41346	6.63319	5.63836	5.60782
VIT_05s0029g00500	4.09873	5.01465	6.24609	5.48971	5.01093	5.60615
VIT_16s0022g02230	4.19509	4.72101	6.81117	4.57511	6.08513	5.60338
VIT_07s0005g00280	3.87414	4.74452	4.46271	4.29155	4.40008	5.60219
VIT_02s0012g00570	6.7398	4.99624	4.78607	7.01903	4.80409	5.59703
VIT_02s0025g04060	4.18877	6.41892	6.75511	5.10699	6.90569	5.59664
VIT_18s0001g03790	4.99488	5.16993	5.95148	4.53543	5.54123	5.59594
VIT_11s0037g00940	6.54164	6.72315	4.50801	5.33259	5.31119	5.59465
VIT_08s0007g06390	5.41797	5.33949	5.45626	7.00068	5.42324	5.59425
VIT_13s0067g03210	4.31204	5.36083	5.37423	5.1224	5.31904	5.59305
VIT_03s0017g02360	4.35309	4.97101	5.43507	4.59872	4.97743	5.59206
VIT_11s0065g00170	5.72692	4.89659	4.98899	5.53439	4.51854	5.59056
VIT_05s0020g04540	6.01235	4.57026	6.89793	5.83146	6.31759	5.59016
VIT_07s0104g00080	4.67864	5.47832	5.46891	5.10643	5.54019	5.58796
VIT_18s0001g13010	5.93216	5.9939	4.87036	5.73688	5.86146	5.58787
VIT_13s0067g03530	4.57026	5.55704	5.61697	5.11131	5.99744	5.58145
VIT_14s0006g01420	5.75622	4.23751	5.71278	4.99835	6.00712	5.58105
VIT_01s0010g00240	5.84256	4.20059	3.0024	4.39598	3.85067	5.58055
VIT_06s0004g07090	6.41526	5.37736	5.1188	6.47075	5.19101	5.58035
VIT_08s0007g01510	5.40577	5.58777	6.02916	4.83289	6.1179	5.58015
VIT_08s0058g01440	6.65707	5.07881	5.74443	6.24584	6.0869	5.57743
VIT_05s0020g04010	5.85308	5.4435	5.64261	4.45044	5.05904	5.57743
VIT_13s0067g02510	4.59991	4.84197	5.25927	4.62332	4.56051	5.57743
VIT_19s0014g05190	4.63304	5.59455	5.16591	4.93231	5.39495	5.57703
VIT_18s0001g14440	6.52424	4.95125	6.18897	5.64626	5.13545	5.57612
VIT_04s0044g01940	4.59753	5.71397	5.39552	4.73082	5.45637	5.5739
VIT_01s0011g04630	5.92647	6.5655	6.32583	5.84841	6.73764	5.57107
VIT_05s0077g01480	5.06595	6.37005	6.2609	4.8885	6.7747	5.56955
VIT_03s0180g00170	5.20685	5.4044	6.2171	5.45954	5.82672	5.56945
VIT_13s0019g00760	6.6015	5.65277	4.03239	7.11235	4.85947	5.56905
VIT_14s0030g01220	3.88525	5.62585	4.92647	3.97055	4.77435	5.56813
VIT_14s0083g01160	5.02	4.77012	6.43302	4.73985	6.54957	5.56742
VIT_11s0065g01210	4.40984	6.09163	5.75889	4.95373	5.37828	5.56621
VIT_03s0132g00070	6.52956	6.23554	5.65983	4.96317	6.36025	5.56438
VIT_18s0072g00260	5.85449	4.83576	6.7126	5.44339	5.69887	5.56377
VIT_14s0060g01940	7.12178	2.9988	4.95652	3.90529	1.09761	5.56306
VIT_06s0080g00260	-2.70526	6.73041	6.1594	1.83727	6.74223	5.56295
VIT_11s0016g01190	5.57329	5.6822	6.01443	4.97896	6.26704	5.56224
VIT_04s0044g00040	5.39552	4.73624	5.84197	4.72338	6.40611	5.56051
VIT_07s0005g00170	4.01167	6.11478	9.21274	6.10706	6.8131	5.55745
VIT_09s0002g06790	-2.44746	6.39723	6.86204	1.91329	7.08764	5.55663
VIT_05s0077g01940	5.40497	5.55868	6.27767	5.88435	6.24438	5.55223
VIT_11s0016g00470	9.12612	5.56387	5.24995	8.94201	5.98451	5.55029
VIT_14s0006g00180	4.81061	5.36958	6.70132	4.26354	6.13901	5.54946
VIT_17s0000g08010	4.54844	4.30256	4.86096	3.84532	4.32313	5.54597
VIT_02s0025g02490	3.25902	6.66827	7.45785	4.31058	5.53491	5.54514
VIT_10s0003g01730	4.38244	6.61073	7.02938	4.52231	6.34572	5.54226
VIT_12s0035g01900	8.46596	6.76739	4.16645	6.57355	6.04592	5.54164
VIT_08s0007g00930	4.12295	5.85848	5.7919	4.88801	6.28633	5.53781
VIT_08s0007g07540	4.63537	5.73742	4.85133	4.98838	5.70727	5.53533
VIT_01s0150g00410	3.24894	3.95295	5.52231	2.60881	4.67412	5.53387
VIT_17s0000g01270	5.55786	5.59335	6.11478	6.67257	6.21994	5.53086
VIT_17s0000g02010	7.99981	5.78703	4.57672	7.10898	5.54885	5.52836
VIT_15s0046g02400	7.29686	3.57006	4.91217	5.06106	3.45154	5.52722
VIT_08s0007g00140	6.60605	5.25726	5.22484	6.56071	5.91161	5.5269
VIT_05s0020g02170	1.16135	3.58095	4.60269	1.53107	4.2426	5.52669
VIT_17s0000g03930	2.68032	5.01287	0.0332762	2.51096	1.53771	5.52576
VIT_15s0048g02720	6.12253	4.59952	5.56346	5.45429	5.88891	5.52367
VIT_05s0062g00980	6.54236	5.37249	6.4238	6.66562	5.16939	5.52367
VIT_01s0137g00210	7.72133	5.98467	4.2817	8.031	5.95923	5.52283
VIT_18s0001g08830	4.65631	5.47541	5.55018	5.12212	5.4334	5.51969
VIT_17s0000g04660	6.90581	5.9245	5.56194	6.89627	5.95613	5.51644
VIT_02s0012g00530	4.52753	5.59952	4.97529	4.89012	5.10378	5.5158
VIT_18s0001g09910	5.48896	6.70363	4.0066	6.75364	6.2502	5.51496
VIT_17s0000g07350	5.04949	5.5042	4.75435	4.29401	4.82222	5.51181
VIT_07s0005g04460	5.18349	5.90641	5.58906	5.52314	5.89409	5.51001
VIT_05s0077g01210	5.24691	5.35919	5.45077	6.31306	5.35943	5.50991
VIT_06s0004g05490	4.99955	5.37295	5.65973	4.70966	5.32109	5.5097
VIT_01s0010g02260	4.58836	5.34471	6.40054	4.29352	6.216	5.50948
VIT_11s0016g03760	3.49057	4.74219	5.32481	3.0993	5.03166	5.50948
VIT_13s0158g00340	5.45965	5.70496	5.90753	5.19613	6.0974	5.50938
VIT_14s0060g00720	6.36556	5.35544	5.19377	5.97812	5.02591	5.50917
VIT_16s0050g02480	7.13141	6.41605	5.32421	7.41594	5.23228	5.50779
VIT_03s0038g02860	5.31904	5.74658	4.48736	5.10531	4.88215	5.50684
VIT_06s0004g07760	4.90127	5.10615	4.74971	4.60684	4.76871	5.50642
VIT_06s0004g06850	3.72356	4.69877	4.89174	2.50504	4.71498	5.50621
VIT_01s0011g00760	0.695994	4.45593	3.43207	1.73841	3.77435	5.5061
VIT_05s0062g01120	6.22355	4.4511	6.88134	6.18004	6.02118	5.50557
VIT_03s0017g00710	2.22856	5.84113	4.86295	3.93609	5.2211	5.50176
VIT_14s0060g00420	3.3799	5.08591	4.11825	3.59654	4.4103	5.50091
VIT_14s0006g02720	6.61432	5.69386	5.73679	7.22091	6.58165	5.5008
VIT_14s0081g00320	4.09592	5.06853	4.03092	4.10182	4.26804	5.50048
VIT_05s0094g00360	4.30694	3.63033	5.75515	4.04352	6.00637	5.49249
VIT_01s0011g06000	5.38128	5.95946	4.91329	5.05297	5.28614	5.49207
VIT_04s0023g01150	6.93452	6.41092	6.13367	7.07003	6.84507	5.491
VIT_01s0026g02100	6.05036	5.05961	5.42246	4.93326	5	5.491
VIT_10s0071g00970	4.97147	5.30159	5.85333	5.6744	5.73778	5.48843
VIT_15s0048g01300	6.79779	5.2859	5.59485	6.64063	5.59286	5.48789
VIT_15s0048g01870	6.53699	4.93263	5.42033	6.25027	5.15286	5.48629
VIT_19s0015g00020	1.31808	4.33819	5.49078	3.16027	4.39461	5.48618
VIT_14s0030g00670	2.86526	4.55766	5.11728	2.87971	4.79597	5.48532
VIT_02s0025g04950	3.41954	6.60021	4.82545	5.57006	5.50324	5.48468
VIT_12s0055g01110	7.76168	6.28374	5.0145	8.46057	6.58326	5.48392
VIT_19s0015g02730	2.12433	5.61392	4.8608	2.55582	4.75631	5.47703
VIT_01s0026g01880	4.87152	5.80228	6.19449	5.21633	6.07874	5.4753
VIT_04s0023g03510	6.91715	5.70699	4.74667	7.20939	5.15731	5.47292
VIT_06s0009g02530	4.57269	5.31747	5.54319	4.85748	5.26341	5.47173
VIT_16s0050g00650	5.02768	4.86394	4.45374	4.02621	3.62059	5.46945
VIT_01s0113g00560	3.83323	4.91934	5.54689	4.08463	4.63343	5.46891
VIT_14s0060g01660	5.12846	5.36656	6.0145	5.85266	5.75061	5.46847
VIT_19s0015g00050	1.37481	4.52502	5.46576	2.71882	4.38382	5.46793
VIT_15s0046g00480	-1	3.42044	5.1981	-0.980891	1.852	5.46641
VIT_19s0135g00190	4.75827	5.6091	4.59335	5.39392	5.22471	5.46282
VIT_08s0040g00540	5.43107	6.33485	5.73904	5.19285	5.73724	5.46194
VIT_01s0011g00470	4.15812	5.58646	4.97911	4.37897	5.22972	5.46052
VIT_02s0025g01610	5.74846	4.87332	6.37336	6.23898	6.62483	5.45899
VIT_03s0088g01220	4.74595	5.93632	5.64923	4.94704	6.1823	5.45812
VIT_04s0023g00830	5.66619	6.2719	4.98596	5.76129	6.08711	5.4579
VIT_13s0019g03320	4.85964	5.69664	5.00944	4.53792	5.70127	5.45779
VIT_09s0002g02120	6.99039	5.3978	5.45088	6.45204	6.58185	5.45713
VIT_13s0067g01680	5.05456	6.6093	3.30694	4.86063	5.47335	5.45626
VIT_12s0057g00100	2.31518	5.21852	6.72297	5.43741	5.24742	5.4544
VIT_14s0030g01600	4.7747	5.22432	5.71452	4.66145	5.06134	5.45308
VIT_09s0002g00330	4.87627	5.49559	6.57698	4.42492	7.40005	5.45198
VIT_10s0003g03750	4.75631	3.30791	4.0021	4.50801	3.48671	5.45
VIT_08s0007g00580	3.35849	5.36013	6.17033	4.03562	5.92228	5.44945
VIT_05s0020g00760	5.59644	5.58185	5.69023	6.88765	5.64703	5.44857
VIT_01s0011g04210	4.9214	3.84197	4.43741	4.60269	4.15893	5.44769
VIT_14s0068g02070	3.62605	4.99835	5.34873	4.31179	4.73155	5.44725
VIT_15s0024g00650	6.62712	5.74317	5.83887	6.96732	6.0406	5.44615
VIT_14s0030g01340	4.44758	5.68762	5.4638	5.57208	5.94525	5.44559
VIT_18s0001g08090	7.64815	6.15738	5.30049	7.73956	6.09078	5.44504
VIT_03s0063g02050	7.05398	5.24375	5.3011	6.45746	5.33283	5.44493
VIT_13s0067g02950	6.74734	6.19889	4.81284	6.88028	5.48553	5.44438
VIT_16s0098g00940	4.79597	4.19902	5.01777	5.21878	4.16511	5.44283
VIT_14s0006g02900	5.48521	4.99337	6.31052	5.38543	6.08392	5.44217
VIT_05s0020g00440	6.98687	5.29499	6.11187	6.32205	7.06124	5.44117
VIT_17s0000g07470	8.09859	4.8015	5.91337	7.03225	5.6728	5.43962
VIT_16s0050g00160	4.81592	5.91584	5.17513	5.2193	6.10203	5.43807
VIT_11s0016g03010	6.57511	5.27612	4.98444	6.17026	4.78816	5.43774
VIT_03s0180g00030	4.73191	5.21697	5.897	4.77961	5.58236	5.43663
VIT_18s0001g10560	4.65859	5.29094	5.77268	4.89352	5.63971	5.43618
VIT_17s0000g05270	-4.42146	7.12836	-1	5.42156	5.87455	5.43095
VIT_06s0080g00790	4.51412	5.84875	5.83432	5.29841	6.24248	5.42962
VIT_14s0066g01230	4.60249	4.96455	4.65554	4.66278	4.41774	5.42872
VIT_13s0064g00870	4.55336	5.41695	5.20659	4.96501	5.24362	5.42828
VIT_09s0002g02690	5.16471	5.69868	5.1939	6.97001	5.91193	5.4266
VIT_08s0007g02700	2.44095	0.124328	5.97919	1.7852	2.60249	5.42481
VIT_09s0002g01090	5.38578	4.73082	4.42783	5.96986	4.77452	5.42391
VIT_07s0005g03570	6.41515	4.72883	5.2292	5.44261	5.53232	5.42055
VIT_03s0180g00320	7.37955	5.98353	6.09621	5.93184	5.92037	5.4192
VIT_12s0057g00420	5.41109	6.2567	6.36077	4.80443	6.87492	5.41898
VIT_18s0001g10160	0.956057	4.35238	4.59076	1.41684	3.09986	5.4174
VIT_11s0016g02830	3.84432	4.78938	5.41616	4.75667	4.92299	5.41718
VIT_18s0089g01270	-1.51457	6.68678	9.03627	4.52063	8.85748	5.41661
VIT_09s0002g05730	7.69919	5.66543	5.30378	8.344	5.55182	5.41661
VIT_01s0011g04650	5.88109	4.2817	6.51953	4.68351	5.99789	5.41571
VIT_19s0015g01760	7.94435	5.81984	4.58215	8.44627	6.12447	5.41425
VIT_13s0139g00170	6.73859	5.30585	5.30134	6.36848	5.35614	5.41233
VIT_05s0102g00450	3.31421	4.86575	6.37318	3.18004	5.90585	5.41097
VIT_11s0016g01700	4.55336	5.40463	5.59713	5.51948	5.66344	5.40611
VIT_14s0171g00320	1.82782	4.27823	6.36352	2.85665	4.59554	5.40599
VIT_14s0068g01360	2.4638	3.80323	6.79697	2.67205	5.05861	5.40395
VIT_19s0085g01170	-1	7.6329	6.11117	2.5177	6.24012	5.40304
VIT_18s0001g04150	3.80529	5.30305	6.20346	3.11159	5.89207	5.40065
VIT_04s0008g00950	4.32337	5.59952	4.42089	3.59534	4.15218	5.39997
VIT_07s0005g00990	4.81984	6.09212	6.02481	4.52231	6.10203	5.39712
VIT_10s0116g01400	6.36405	5.68753	4.1386	5.6728	4.76854	5.39621
VIT_04s0023g02950	4.83761	5.20893	5.98542	4.61078	6.30092	5.39563
VIT_14s0068g00930	6.4746	6.44967	5.02222	6.23866	6.01264	5.39529
VIT_14s0006g00430	4.43563	5.09789	5.08916	4.27003	5.16484	5.39392
VIT_07s0129g01060	3.68444	5.33211	5.62517	4.60229	5.29401	5.39083
VIT_18s0072g00110	6.61976	5.54298	5.20698	6.70252	5.25273	5.39048
VIT_03s0038g02030	1.41864	7.96725	-1.5009	0.690045	5.38842	5.38853
VIT_03s0091g00450	3.55008	5.22342	5.66505	3.94829	4.88525	5.38704
VIT_07s0031g00700	5.13682	4.38082	5.57541	4.6477	4.99533	5.38463
VIT_14s0108g00090	4.47897	5.2956	5.61166	5.42414	5.01569	5.3844
VIT_05s0020g04800	7.41148	5.87652	5.73001	7.2986	5.84256	5.38071
VIT_05s0094g01160	5.9942	5.86253	4.93389	6.08902	5.97208	5.37921
VIT_01s0026g01050	6.47086	5.30208	4.45615	6.10657	4.92204	5.37851
VIT_18s0001g06170	5.58856	9.25125	9.50966	5.13313	9.39192	5.37712
VIT_19s0015g01340	4.47119	4.75809	5.6933	4.66751	4.67901	5.37701
VIT_02s0025g03020	5.3067	6.04243	6.07368	5.38128	6.29198	5.37376
VIT_19s0177g00300	6.73548	5.75987	5.36259	6.79338	5.46412	5.37365
VIT_18s0001g03520	4.68725	4.4425	5.67788	4.71113	5.01792	5.37168
VIT_18s0089g00940	-1	6.49281	1.9988	2.28787	4.95451	5.37168
VIT_12s0059g01300	5.10797	5.0268	5.62673	4.58796	5.75096	5.37156
VIT_07s0197g00060	4.4942	5.33842	4.66581	4.69766	5.20698	5.37086
VIT_17s0000g00830	3.66827	5.03328	3.83996	4.21723	5.54566	5.37063
VIT_08s0007g08950	5.71708	5.16189	3.38451	4.29621	3.88166	5.3697
VIT_07s0104g00860	4.47725	5.28281	5.43084	5.01346	5.51317	5.36935
VIT_18s0001g07770	3.72756	5.58266	5.42167	4.08094	5.18837	5.36935
VIT_05s0049g01550	3.56438	2.54514	5.50155	3.72756	3.0635	5.36877
VIT_11s0078g00260	5.28503	6.16571	5.85956	5.50684	5.61225	5.36865
VIT_16s0022g01190	-1	3.43918	7.50157	0.931053	4.23624	5.36784
VIT_17s0000g04960	4.04323	4.64366	5.20098	3.79874	5.09733	5.36725
VIT_13s0019g04030	4.96594	4.69284	5.63875	4.3296	5.77012	5.36434
VIT_02s0033g00180	3.94798	4.84566	5.55193	4.50101	4.49484	5.36118
VIT_17s0119g00110	5.12281	5.89263	6.81813	4.94408	6.63807	5.35814
VIT_08s0105g00290	4.29548	4.97865	5.56529	4.82392	5.32433	5.35779
VIT_03s0063g00060	3.86856	4.6997	5.96871	4.00809	5.44581	5.35755
VIT_13s0074g00150	4.96532	4.93907	6.08059	5.46923	5.62868	5.35579
VIT_12s0028g00960	4.05282	4.78031	5.49942	4.17978	4.24463	5.35567
VIT_04s0023g01940	4.98094	5.49036	5.06523	4.76058	4.48907	5.3545
VIT_18s0001g05250	6.33235	6.11783	5.83407	5.96424	6.54081	5.35438
VIT_02s0025g05050	4.69636	5.3421	5.54731	4.95373	5.47108	5.3525
VIT_08s0040g02740	6.12516	5.50059	6.43607	6.15509	5.83238	5.35215
VIT_12s0028g01940	-3.32193	3.07496	4.01673	0.197446	3.72028	5.35179
VIT_06s0004g08380	6.02348	5.48607	4.70247	6.02466	5.17552	5.35132
VIT_11s0016g00720	6.33759	5.26316	5.16872	6.46096	5.2902	5.35085
VIT_10s0003g05380	6.46151	4.80615	6.27681	5.50896	6.10322	5.34743
VIT_14s0068g00300	2.06235	5.75248	5.6728	4.45308	5.72973	5.34696
VIT_18s0001g08810	4.09901	3.29768	5.32157	4.45352	3.80667	5.34424
VIT_16s0050g00830	9.23225	5.33593	5.32193	7.90054	5.05687	5.3421
VIT_10s0003g04270	7.11911	5.62293	4.63537	6.7009	5.46009	5.34139
VIT_06s0004g06830	4.41481	6.54169	3.37897	4.33652	6.81609	5.34056
VIT_11s0016g02580	4.81198	5.44769	5.15178	4.23853	4.93734	5.33819
VIT_14s0006g01400	5.04396	5.50367	5.96955	4.6837	5.98846	5.33795
VIT_14s0108g01040	6.37527	5.10252	5.66297	6.34524	5.55193	5.33771
VIT_03s0038g02110	6.45785	3.69377	4.69488	6.9814	5.06695	5.33759
VIT_10s0071g01120	3.25147	7.82235	1.74416	5.43062	6.41086	5.33545
VIT_18s0001g14230	6.24216	5.4663	5.87291	6.99462	6.12722	5.33426
VIT_04s0008g03050	5.11866	4.45637	4.4334	4.63479	4.11548	5.33402
VIT_16s0013g00450	3.45154	4.29964	5.68173	3.79528	5.04075	5.33378
VIT_14s0068g01500	6.41509	6.68874	6.00891	5.85873	7.41723	5.33259
VIT_04s0044g00970	3.6694	3.85266	5.87717	4.11631	4.26729	5.33211
VIT_04s0023g03040	9.0759	7.10762	3.3914	7.77933	6.02303	5.33163
VIT_18s0001g15270	4.47032	5.24539	5.63981	4.47617	5.28281	5.329
VIT_05s0020g02290	1.4991	4.58736	5.38301	2.94548	5.01316	5.32817
VIT_08s0040g02700	6.66349	4.94298	5.03298	5.46706	4.78747	5.32781
VIT_05s0077g02320	4.44846	5.05803	5.48349	3.76412	5.42749	5.32661
VIT_05s0020g03130	7.2292	5.86303	5.34589	6.85129	5.9933	5.32457
VIT_14s0068g00830	6.77334	5.71964	4.57874	6.79857	5.22882	5.32157
VIT_16s0098g01830	5.13928	6.22933	4.86179	5.53885	5.80941	5.3194
VIT_11s0016g04340	3.47854	4.78101	5.12046	3.82883	4.94001	5.3188
VIT_11s0016g03650	5.03416	5.17685	6.01911	5.3479	6.25443	5.31796
VIT_09s0002g04260	7.29575	5.65707	5.20893	7.14904	5.84323	5.31566
VIT_02s0012g00550	4.61863	5.45932	4.90673	5.79649	5.42705	5.31542
VIT_14s0030g01880	6.19397	5.44051	3.2854	6.19436	3.07952	5.31458
VIT_04s0044g02020	6.59808	5.23202	5.20685	6.01331	5.22265	5.31397
VIT_13s0084g00240	2.32481	2.47075	6.47519	2.44007	4.0268	5.31397
VIT_01s0011g02320	4.30354	6.51475	7.62512	4.41954	6.8323	5.31167
VIT_07s0104g00380	3.98702	4.79494	4.7221	4.2497	4.22984	5.31095
VIT_11s0037g01230	4.55582	3.7481	5.7211	4.13011	5.55959	5.30901
VIT_16s0050g01150	1.61353	6.95191	6.50737	3.9607	7.32298	5.30876
VIT_17s0000g06050	5.86748	4.52461	5.59286	5.20802	5.13463	5.30791
VIT_07s0129g00400	3.78834	4.55623	5.03958	4.71589	4.94579	5.30646
VIT_12s0057g00070	-0.206451	5.77417	6.87774	2.15164	4.42425	5.30621
VIT_03s0063g01800	5.83769	5.05817	4.59475	5.28269	4.93042	5.30609
VIT_18s0001g09490	5.04323	4.93279	5.74828	4.07753	5.01569	5.30317
VIT_18s0001g13900	4.58616	5.19495	5.05224	4.34908	5.23432	5.30256
VIT_14s0060g00810	5.43951	5.05846	4.75025	4.24108	5.35919	5.30244
VIT_17s0053g00210	5.32457	5.13011	5.70883	4.97652	5.89377	5.30183
VIT_08s0058g00640	7.01774	6.28651	3.86063	7.11811	5.43218	5.29744
VIT_07s0005g01590	6.48854	4.98808	4.59455	5.77496	4.73191	5.29327
VIT_14s0030g01930	4.35685	4.71498	5.4446	4.27922	4.93042	5.2918
VIT_09s0002g04130	4.28762	4.62547	4.38704	4.36737	4.7977	5.29069
VIT_14s0128g00330	4.84599	5.2967	5.67469	4.83289	5.71763	5.2902
VIT_06s0004g03390	3.90368	5.97162	6.33062	5.71186	6.27246	5.2875
VIT_11s0016g02910	3.81284	4.62547	5.5403	4.80924	4.99654	5.2875
VIT_01s0026g01030	4.49335	5.33462	5.94361	3.94111	5.77321	5.28725
VIT_07s0141g00360	6.63658	6.06889	4.28639	5.72137	5.06005	5.28602
VIT_18s0001g06270	4.87349	4.55479	6.21516	4.42313	6.28089	5.28503
VIT_18s0001g11970	7.36419	6.24241	4.6313	7.36256	5.76483	5.28442
VIT_06s0080g00980	1.68706	3.81626	4.05889	1.15272	3.04381	5.28405
VIT_02s0025g00280	2.18375	6.31862	5.25475	3.60011	7.2813	5.28367
VIT_04s0008g00690	3.92442	5.08647	6.21613	3.80012	5.97575	5.28244
VIT_04s0023g02880	5.01881	3.87905	4.87823	3.70413	3.84197	5.27637
VIT_05s0029g00370	-3.47393	6.41583	5.34672	4.23598	6.89449	5.27612
VIT_13s0067g00260	6.7584	7.12705	7.68606	7.16125	8.00615	5.27575
VIT_17s0000g07780	6.2833	5.41797	4.95853	5.98467	5.2393	5.27314
VIT_15s0046g03200	6.26828	5.54102	4.90111	6.15792	5.59753	5.27227
VIT_09s0018g01700	4.32097	5.4435	5.03372	4.7899	5.09677	5.27165
VIT_08s0007g00470	4.82001	4.73931	5.33462	4.2859	5.37701	5.27053
VIT_15s0046g01280	6.24394	5.67807	4.34885	7.03048	4.84264	5.26878
VIT_06s0004g03540	5.6277	6.29854	6.3565	5.55162	6.7216	5.26841
VIT_14s0128g00710	6.16859	5.51822	4.98109	5.5736	5.34305	5.26704
VIT_13s0074g00430	4.55479	5.19311	5.42021	4.88313	5.63159	5.26641
VIT_18s0001g08970	5.32409	5.52951	4.50314	5.53346	4.55295	5.26641
VIT_03s0063g01380	4.7281	4.70247	5.56823	4.62059	4.90705	5.26591
VIT_05s0049g01980	0.641546	4.46706	3.21826	1.47854	3.13696	5.26541
VIT_06s0004g03310	4.75898	5.55326	4.99322	5.15758	5.62	5.26253
VIT_08s0040g01200	0.884923	4.28663	4.69228	0.936088	2.66372	5.26241
VIT_08s0007g04460	4.17579	5.27922	5.45407	4.6241	5.22831	5.2609
VIT_05s0020g03320	1.82511	4.41819	4.46815	3.19009	4.83643	5.26015
VIT_05s0020g04670	7.05373	4.72901	4.70727	6.80055	3.7673	5.25915
VIT_15s0048g01230	4.27699	5.15421	5.0406	4.15354	4.86888	5.25902
VIT_06s0004g01110	4.38244	4.02945	4.74631	4.75933	4.29352	5.25852
VIT_03s0017g01700	5.99254	4.61843	4.38059	5.62877	3.58856	5.25789
VIT_08s0007g01690	5.37492	6.08541	5.98193	4.41301	6.41532	5.25751
VIT_06s0004g04580	4.60723	5.29315	5.58195	5.08888	5.81489	5.25751
VIT_18s0001g02780	-4.42146	3.69859	5.23445	1.77259	5.07781	5.25714
VIT_05s0020g02130	6.16316	5.18203	4.99292	6.46945	4.94595	5.25676
VIT_07s0005g01050	3.70118	4.73136	4.85582	4.65688	4.15381	5.2555
VIT_19s0014g02650	3.06235	4.55029	5.43729	3.03151	4.89174	5.25361
VIT_17s0000g00090	6.15778	5.5374	4.82324	6.42828	5.13696	5.25349
VIT_18s0001g03230	4.42917	4.76359	4.74703	4.19666	5.00988	5.25121
VIT_11s0016g05410	7.82222	4.94767	5.83904	7.7392	6.15015	5.25096
VIT_06s0004g06110	6.78498	5.16256	5.10434	6.55469	5.58666	5.24995
VIT_05s0077g01550	3.46641	6.66011	7.149	3.11103	4.09958	5.24982
VIT_06s0004g00940	5.56621	4.35356	4.92013	6.02695	4.81796	5.24932
VIT_13s0156g00100	6.12115	4.56031	3.07382	6.66742	4.06091	5.24831
VIT_05s0020g03330	1.22239	6.2075	6.60313	3.78206	6.48242	5.24476
VIT_06s0004g02200	3.07724	5.0368	5.74147	3.93766	5.26828	5.24438
VIT_14s0108g01500	4.46183	5.33557	5.95257	5.0781	5.84766	5.24298
VIT_02s0025g04710	6.26903	5.40599	4.51958	6.85395	5.20971	5.24197
VIT_14s0068g00160	5.824	4.22188	5.55817	5.31771	4.54185	5.24082
VIT_16s0050g02240	6.43496	5.10028	5.32637	7.13429	6.15819	5.24006
VIT_18s0001g13320	-0.514573	6.28052	4.90849	1.23675	5.61589	5.2356
VIT_15s0046g01040	-3.09954	6.24355	1.29474	5.30475	4.79667	5.23394
VIT_14s0066g01580	4.08718	5.14187	4.41188	4.69191	5.82689	5.2324
VIT_11s0016g05620	4.47746	5.39483	5.11853	5.12626	5.29915	5.22792
VIT_12s0035g02270	4.50377	4.6605	5.4121	4.55582	5.03943	5.22779
VIT_05s0020g04730	3.01792	4.90673	5.64232	3.63072	5.63013	5.22677
VIT_05s0077g01860	5.21438	6.88578	3.86129	7.46475	5.98906	5.22265
VIT_07s0104g00240	4.3296	4.78381	5.26366	4.71168	5.17818	5.22188
VIT_11s0016g05400	5.97154	4.26704	4.41594	5.43785	4.33438	5.22188
VIT_16s0098g01380	4.54473	4.37016	3.88069	3.34861	3.35003	5.22162
VIT_03s0088g00160	5.07938	4.90705	6.25795	5.96209	6.48322	5.21917
VIT_07s0031g01980	5.33151	2.81762	5.142	4.49995	4.60031	5.21865
VIT_15s0048g01000	7.32841	6.03599	5.16229	6.98948	5.91033	5.21801
VIT_06s0004g06340	6.16263	4.92505	4.96209	5.53957	4.96332	5.21529
VIT_19s0015g01370	4.90769	4.80684	6.17725	5.61304	4.25902	5.21218
VIT_18s0001g01470	3.46467	5.42705	5.7572	3.15435	5.44018	5.21166
VIT_07s0031g02400	1.44361	3.23215	5.14988	0.704872	3.69711	5.2101
VIT_04s0043g00340	4.12763	4.70266	4.48005	5.38059	4.46576	5.20997
VIT_08s0058g01300	3.88134	4.45044	5.24197	4.23573	4.96501	5.20867
VIT_08s0007g02760	6.16645	5.5661	4.87774	6.41712	5.13928	5.20711
VIT_12s0028g03650	3.40145	4.46619	5.6521	3.73082	4.95093	5.20555
VIT_08s0007g02860	3.08009	5.18666	5.21205	3.55541	4.91472	5.20425
VIT_03s0063g00370	4.1375	5.0658	5.09114	2.68706	4.7069	5.20385
VIT_04s0023g01120	6.36656	4.15866	4.15785	6.16343	4.38151	5.2032
VIT_13s0047g00210	6.54164	3.77083	5.65	6.54221	5.17246	5.20281
VIT_07s0129g00660	5.95791	3.42313	1.26704	6.02732	3.2859	5.20255
VIT_17s0000g05260	5.62654	5.02739	5.66628	6.31482	5.82528	5.20242
VIT_01s0026g01430	4.61883	5.93373	6.08243	4.7456	6.11873	5.20059
VIT_06s0004g03640	4.32265	5.38036	5.10378	4.65402	4.87938	5.20059
VIT_04s0008g05960	6.30317	5.4489	5.15137	6.42559	5.14826	5.19902
VIT_06s0004g03450	5.08676	4.97789	5.53429	4.79095	5.8679	5.19627
VIT_05s0077g01970	5.00944	6.91982	6.86987	4.96255	6.53849	5.19351
VIT_16s0098g00330	4.52252	5.305	5.26516	4.2393	5.73109	5.18785
VIT_06s0004g04270	6.85017	6.04184	4.88801	7.84147	5.49687	5.18771
VIT_15s0046g03010	2.51686	4.33438	2.82171	3.04847	2.57773	5.18679
VIT_16s0098g01060	0.00480099	5.9156	7.09029	2.05889	6.65988	5.186
VIT_03s0063g00820	5.58516	4.86245	4.97407	6.44372	5.6313	5.18507
VIT_08s0007g08260	5.27575	4.35379	4.82545	4.71699	4.21335	5.18335
VIT_18s0001g06090	1.28885	4.31204	5.98846	3.72028	4.58496	5.18296
VIT_02s0012g00150	3.2918	5.84348	6.27053	4.04439	6.21023	5.1819
VIT_14s0066g01880	3.14023	5.11006	6.85723	3.26003	5.27674	5.18057
VIT_06s0004g02100	5.88639	4.85433	4.64366	5.16564	4.68893	5.18004
VIT_14s0066g02550	6.29927	6.56676	4.0268	7.04345	5.22471	5.17898
VIT_18s0122g00480	3.90368	5.499	5.40973	4.32745	5.64424	5.17832
VIT_17s0000g01280	-0.79419	3.49399	5.5405	2.66448	4.01555	5.17313
VIT_12s0059g02350	-1	8.14502	5.24577	6.03423	7.27311	5.17126
VIT_02s0012g01240	4.19009	5.59335	5.23688	4.4766	5.84766	5.16966
VIT_03s0038g04250	8.30656	6.03262	5.10811	8.05188	6.19646	5.16939
VIT_15s0046g01680	6.209	5.97422	4.77751	5.86625	6.21451	5.16859
VIT_02s0025g02500	4.14676	4.32649	5.59624	4.95699	5.29474	5.16457
VIT_06s0004g02410	6.80215	5.46423	5.34353	6.6966	5.59723	5.1639
VIT_11s0118g00480	4.59495	5.25134	5.45297	5.49239	5.22497	5.16202
VIT_10s0003g04090	5.20425	2.94048	5.5735	4.20659	5.0072	5.15475
VIT_17s0000g07840	6.38071	5.3814	3.26754	5.60605	3.95078	5.1534
VIT_07s0031g01330	6.0941	5.10168	4.43696	5.27339	4.70229	5.15218
VIT_04s0069g00770	4.22188	4.73949	5.11478	4.34577	5.26015	5.1511
VIT_14s0066g00250	5.32577	7.22898	5.34068	7.50457	6.70215	5.15083
VIT_17s0000g07260	7.08289	5.64472	3.64155	6.35814	5.15893	5.15042
VIT_13s0019g04450	2.52857	4.66922	6.15239	3.98944	5.80899	5.14921
VIT_01s0010g02670	6.25147	5.40293	4.64981	6.93562	5.17539	5.14853
VIT_18s0122g00110	4.06005	4.91265	5.21607	4.29915	4.92916	5.14839
VIT_04s0008g01520	2.08066	3.83424	7.04665	3.28787	7.24957	5.14717
VIT_06s0004g04890	5.90993	5.47627	4.74506	5.31107	5.07182	5.14663
VIT_19s0090g01230	6.80624	5.17832	4.62078	6.56204	5.03782	5.14663
VIT_15s0048g02700	6.06422	5.3906	4.8535	6.42749	5.15906	5.145
VIT_08s0040g00990	4.45242	4.95373	5.50959	4.4314	5.51916	5.14269
VIT_13s0019g04610	4.2812	4.78903	4.39598	4.20425	4.60486	5.13969
VIT_06s0004g04410	5.02989	5.12681	4.02916	3.98368	3.92853	5.13887
VIT_02s0012g01880	5.0808	4.96794	6.06501	5.96694	5.81634	5.13737
VIT_03s0038g02090	6.89724	5.54936	4.34767	7.63319	5.41628	5.13477
VIT_11s0016g03960	5.65802	4.06379	4.48113	4.91169	4.0852	5.13449
VIT_10s0003g02940	6.19423	5.17792	4.99352	6.27457	5.19993	5.13408
VIT_14s0066g01390	4.85366	5.5244	3.97024	4.88541	5.57602	5.13217
VIT_13s0019g01260	5.91105	4.69785	5.09198	5.06537	4.35614	5.13175
VIT_19s0027g00230	1.71955	4.58656	4.65325	2.80598	5.12336	5.12805
VIT_07s0104g01730	7.33133	4.82137	5.91401	7.17812	5.55326	5.12777
VIT_13s0156g00610	3.14731	5.33271	5.34837	2.54844	5.06566	5.12612
VIT_11s0016g00670	2.91265	6.68589	5.24171	1.55908	5.48263	5.12598
VIT_14s0219g00280	5.86798	6.21626	2.7747	6.00862	5.20685	5.12516
VIT_08s0040g00670	4.3978	4.48027	5.50801	4.98231	5.28281	5.12474
VIT_06s0009g00850	6.60733	5.46999	5.01866	6.00727	5.22123	5.12474
VIT_02s0025g04920	6.68454	4.92805	4.89482	6.08633	5.26654	5.12433
VIT_08s0056g01710	6.09866	5.46902	5.52273	6.35109	5.4591	5.12253
VIT_05s0102g01190	4.58596	5.02665	5.44151	4.76783	5.55336	5.12129
VIT_18s0001g06520	4.20451	4.81027	4.85632	4.21749	4.75613	5.1206
VIT_08s0058g00590	6.10608	5.06379	3.84599	5.72365	4.7604	5.11949
VIT_02s0025g04550	8.13432	3.96255	4.92252	7.08891	3.45681	5.11922
VIT_01s0011g05810	5.77961	4.36574	5.24273	5.73895	5.05021	5.11617
VIT_15s0048g01150	2.62683	4.12983	4.53315	2.82171	4.49143	5.11089
VIT_18s0001g12340	5.82468	4.45308	4.8475	5.72765	3.81455	5.10992
VIT_01s0011g01140	4.75649	4.77873	5.85707	4.81284	5.78354	5.10936
VIT_10s0116g00420	4.37782	4.19954	5.30049	3.80907	4.91616	5.10811
VIT_12s0035g01800	6.33557	5.44084	5.15272	6.2626	5.38474	5.10629
VIT_02s0025g03700	7.22837	5.56143	4.2886	6.58991	5.44328	5.1049
VIT_02s0012g02190	1.46118	6.11742	6.97587	2.56965	6.77268	5.10392
VIT_06s0004g07120	5.11367	6.22702	5.29841	5.8449	5.88517	5.1035
VIT_02s0012g01210	6.68949	5.2967	5.30973	6.37655	5.73922	5.10322
VIT_09s0002g02420	5.67553	4.89466	4.28836	5.47465	4.54761	5.10252
VIT_09s0002g01040	6.54587	5.3814	4.99533	6.88635	5.96293	5.1021
VIT_08s0007g06710	5.27364	6.15164	5.64472	5.287	6.15765	5.10126
VIT_05s0020g05050	4.46923	4.4766	5.70284	3.83086	5.37631	5.10126
VIT_13s0019g03600	4.30621	4.41301	5.40372	4.71882	5.10154	5.0993
VIT_08s0056g00510	5.676	5.14961	5.24311	6.44907	5.31759	5.09845
VIT_08s0007g08290	4.02886	4.59116	5.26341	4.42246	4.49249	5.09845
VIT_16s0039g01770	4.80237	6.30305	3.43162	5.92077	6.53164	5.09592
VIT_06s0004g06520	3.93954	4.12901	4.65459	3.29719	4.15812	5.09395
VIT_07s0031g00480	7.19252	5.31639	4.27352	5.51349	5.43518	5.09283
VIT_17s0000g05070	8.96724	6.77904	4.91345	8.7343	6.86092	5.0924
VIT_08s0007g05540	6.08392	5.28947	4.90497	6.5088	5.61559	5.09142
VIT_02s0236g00020	3.16404	4.40054	4.90191	3.96932	3.92188	5.09001
VIT_03s0097g00600	6.53112	5.75266	6.38192	7.10664	6.23745	5.08874
VIT_17s0000g06610	4.58035	4.64328	5.38428	4.4794	5.52084	5.08803
VIT_19s0014g02980	4.77979	4.44493	5.2407	4.39094	5.63013	5.08661
VIT_14s0030g01900	6.69418	4.83727	5.71195	6.237	5.69339	5.08378
VIT_18s0001g08040	3.78276	3.13586	5.92513	3.88427	4.76571	5.08321
VIT_12s0059g01200	4.91073	4.61098	5.76385	5.13723	5.2902	5.0825
VIT_13s0019g04360	3.87053	4.7241	4.72392	4.19482	4.02326	5.08222
VIT_08s0007g04850	4.02	3.01733	4.35638	3.5319	3.9514	5.08222
VIT_09s0018g00240	7.24555	6.77114	6.37313	6.54689	7.36868	5.08094
VIT_03s0088g00260	7.3022	5.34684	4.33008	5.35755	5.13175	5.08094
VIT_08s0058g00860	4.08151	4.9024	5.79874	4.49164	5.49346	5.07895
VIT_12s0034g01330	3.80047	4.86063	4.77171	4.26754	4.47465	5.07667
VIT_10s0003g05470	6.12997	4.57026	5.09761	5.07153	5.15124	5.07625
VIT_19s0015g00590	-1	6.05969	2.53522	5.9024	4.83794	5.07125
VIT_07s0005g00410	2.56397	4.71589	5.06106	3.5509	4.78381	5.07039
VIT_01s0150g00620	4.14921	4.97881	5.40145	4.94048	5.2478	5.06881
VIT_13s0074g00580	4.98459	5.2918	5.63246	4.46336	5.78328	5.06838
VIT_01s0010g03460	-2.8365	4.65268	5.36958	1.21826	5.47735	5.06795
VIT_06s0004g07560	3.79112	4.6477	4.61058	4.41954	4.62566	5.06781
VIT_13s0074g00470	2.83255	4.54659	4.7357	3.14513	3.70413	5.06781
VIT_11s0016g00960	6.89869	4.69877	5.28306	7.3191	6.33652	5.06681
VIT_16s0050g00080	7.61363	6.47924	5.3914	8.3356	6.48666	5.06465
VIT_18s0072g00160	5.29841	3.30548	5.29768	5.66268	4.25248	5.06365
VIT_12s0028g03610	6.9156	4.68126	5.23087	6.08987	4.95389	5.06307
VIT_02s0087g01020	2.91265	3.75096	2.13093	1.81284	2.07382	5.06264
VIT_12s0059g01590	6.40594	3.84197	2.97514	6.70395	3.24387	5.06206
VIT_05s0029g01140	5.58836	5.70911	3.59415	4.15516	4.76022	5.05976
VIT_18s0001g14840	4.77153	4.85831	5.85	4.56234	5.33485	5.05875
VIT_19s0135g00070	5.20203	4.60664	5.93066	5.82731	6.09621	5.05485
VIT_11s0016g05390	4.73534	4.69339	5.85773	5.86773	5.63266	5.05441
VIT_10s0042g00560	1.77118	6.45461	3.29621	2.10769	5.52419	5.05427
VIT_06s0004g00380	4.33104	4.23036	4.97636	4.11908	5.0492	5.05326
VIT_18s0089g01210	5.4183	5.25147	4.43851	6.19941	4.60802	5.05152
VIT_14s0060g00820	5.01257	4.7069	4.90143	6.11458	4.87987	5.05036
VIT_08s0032g00910	9.47517	6.45927	5.72392	8.91749	6.8955	5.04643
VIT_18s0001g07500	4.4285	5.01896	5.0365	4.40168	5.47768	5.04614
VIT_05s0077g00550	3.75489	5.15637	5.16993	4.74219	5.17459	5.04483
VIT_08s0040g03270	4.14785	5.22946	4.76288	4.55213	5.01703	5.04352
VIT_14s0036g01090	5.35356	5.4363	3.68669	5.20685	4.85117	5.04133
VIT_01s0011g03910	5.37458	4.97545	5.02459	4.25902	5.24691	5.03928
VIT_03s0097g00710	4.0948	5.98474	6.10622	3.88817	5.85748	5.03768
VIT_10s0003g02780	6.2902	5.28133	5.11977	6.28891	5.65335	5.03709
VIT_03s0038g02920	6.4056	4.9817	4.86872	5.74093	5.09733	5.03709
VIT_14s0068g01260	5.96463	4.71058	5.40916	5.84858	5.57501	5.03592
VIT_14s0068g01690	5.32301	4.77716	5.11562	5.90921	4.71113	5.03577
VIT_06s0061g00760	3.18903	4.46227	6.72392	4.51075	4.26278	5.03078
VIT_14s0068g01120	5.74174	5.36446	3.82612	4.85549	4.34577	5.03063
VIT_12s0059g02290	4.03914	3.77224	5.00944	4.32313	4.75025	5.02975
VIT_07s0104g00420	3.89885	5.08165	5.76748	4.58596	5.87045	5.02724
VIT_18s0122g00320	3.99398	5.69887	5.51307	5.52523	5.66647	5.0268
VIT_06s0009g02780	5.69627	5.12143	4.21697	5.58706	4.52649	5.02311
VIT_01s0026g02080	3.97147	5.904	5.49868	3.96008	5.94992	5.02266
VIT_06s0061g01110	-0.736966	5.3339	4.88052	4.0066	4.95915	5.02192
VIT_05s0020g04760	6.21419	5.46216	5.40474	6.63513	5.72638	5.02133
VIT_18s0001g08580	4.98337	6.95156	7.05922	4.60466	7.57127	5.02118
VIT_06s0004g01160	5.70441	4.8898	4.68893	4.48543	4.59554	5.02074
VIT_05s0020g00630	4.89223	4.96701	5.83979	4.7366	6.19002	5.02029
VIT_19s0085g00610	-1	6.37214	0.344828	1.73841	5.55827	5.02015
VIT_14s0030g01240	4.97239	3.98884	5.30293	5.11381	4.97055	5.01985
VIT_13s0067g01070	6.12983	8.53371	7.08902	6.26266	8.1961	5.01941
VIT_12s0059g00570	8.00056	4.70469	6.21361	6.81083	5.98216	5.01911
VIT_04s0008g00680	6.52424	5.36923	5.24565	6.42989	5.58155	5.01837
VIT_02s0025g04630	7.24533	5.14078	4.56031	7.08403	4.98884	5.01748
VIT_10s0116g01200	4.83019	5.68678	6.50149	4.58656	6.50563	5.01733
VIT_01s0011g05180	2.05079	4.78415	5.01182	3.42178	5.41526	5.01718
VIT_06s0009g01200	6.00876	5.67337	4.59375	6.01153	5.08576	5.01391
VIT_18s0001g13270	4.16242	4.63575	4.33866	3.36317	3.96748	5.01331
VIT_07s0130g00040	5.13313	4.64597	4.30232	4.85167	3.53315	5.01153
VIT_17s0000g03690	9.65577	6.62659	5.80675	10.6271	7.11312	5.00735
VIT_11s0016g02440	3.54926	4.3147	5.28009	5.00015	5.22677	5.00465
VIT_05s0049g01020	-2.42146	2.70708	5.3784	0.59773	4.6837	5.00465
VIT_14s0219g00130	1.01673	4.21049	5.24603	1.63846	2.46815	5.00285
VIT_01s0010g03990	-1	6.36428	4.23036	4.30402	4.94283	5.00225
VIT_17s0000g06180	5.06996	4.2149	4.37016	4.2019	4.75257	5.00225
VIT_12s0057g01100	5.32145	5.31723	4.22239	5.2902	4.40259	5.0021
VIT_01s0010g02740	2.96101	4.44714	3.11825	3.62566	2.33342	5.00165
VIT_14s0066g02540	4.4974	4.29841	4.85433	4.04527	4.91584	4.99985
VIT_02s0109g00080	6.2471	5.58726	4.77821	7.04305	5.59694	4.9991
VIT_02s0012g01270	6.32205	5.87119	3.14622	6.53957	4.69859	4.99865
VIT_14s0066g00950	3.8846	4.96717	5.26816	4.8515	4.85266	4.99759
VIT_07s0129g00210	5.61068	5.84766	5.32876	4.44736	5.53201	4.99669
VIT_04s0008g05620	3.05195	4.25449	4.99744	4.91456	4.18666	4.99654
VIT_09s0002g01710	6.33753	4.34127	5.01941	5.41481	4.78328	4.99383
VIT_14s0066g02610	5.53937	5.30305	5.2786	4.69748	5.71342	4.99095
VIT_03s0063g00050	6.75083	4.74003	5.43474	5.92663	5.13422	4.9908
VIT_17s0000g00280	6.00023	4.61706	4.60901	6.20627	4.82069	4.9908
VIT_03s0180g00130	7.31979	5.37504	4.70671	7.08332	4.78834	4.98899
VIT_15s0021g01210	3.20997	4.76199	4.29082	3.82443	4.01525	4.98611
VIT_17s0000g02950	3.69339	3.68182	5.56661	3.56925	4.07496	4.98398
VIT_10s0042g01250	5.98596	5.15232	4.73245	5.83601	4.78415	4.98322
VIT_03s0063g00310	4.49143	4.63479	4.37782	4.95683	3.79355	4.982
VIT_11s0118g00820	4.02503	4.97942	4.75489	4.39461	4.98489	4.98155
VIT_02s0025g04660	1.99398	5.23445	4.79736	2.41504	5.59753	4.98094
VIT_09s0002g04100	3.904	4.08265	4.88264	4.35003	3.97972	4.98079
VIT_12s0059g00200	3.69004	5.77672	5.60753	4.66562	5.53647	4.98018
VIT_19s0014g00020	2.74775	4.62098	4.6777	3.0835	4.21179	4.97926
VIT_01s0011g00530	3.95822	4.02739	4.71425	3.59016	3.83962	4.97911
VIT_02s0012g00030	3.77224	4.7627	5.18415	4.09789	4.49463	4.9782
VIT_08s0058g00200	4.13887	4.31445	5.1469	4.87152	4.57006	4.97591
VIT_11s0118g00790	4.70966	5.56326	5.16872	4.79632	5.62088	4.97545
VIT_15s0046g00220	6.1854	5.11075	3.92916	5.81198	4.64386	4.97453
	-1	5.58185	2.01911	-0.777608	4.30378	4.97116
VIT_02s0025g00140	4.12543	2.02029	4.39598	4.51202	3.44714	4.97101
VIT_03s0038g00050	6.53688	5.06939	4.94173	6.65425	4.69377	4.97024
VIT_02s0025g02590	4.19902	6.81438	5.58135	4.40259	5.22239	4.96978
VIT_05s0094g01510	4.14459	4.89789	5.10112	4.59694	4.96116	4.96794
VIT_12s0035g01180	4.62098	5.49676	5.61736	4.26579	5.64559	4.96655
VIT_11s0016g02280	6.32745	4.66391	4.7977	5.80735	4.90737	4.96563
VIT_14s0108g00480	2.95853	5.15906	5.14785	3.29768	4.92061	4.9644
VIT_18s0072g01000	5.15151	4.70173	4.62117	5.78982	4.58055	4.9644
VIT_15s0046g00740	2.71516	3.94673	4.91217	3.53937	3.41864	4.96178
VIT_14s0066g00310	5.84658	4.81352	4.44824	4.37179	4.2817	4.96101
VIT_13s0047g01100	4.20372	4.75756	4.67054	4.11159	4.32457	4.95992
VIT_17s0000g01850	4.14459	4.54926	4.2817	4.36644	3.84833	4.95869
VIT_04s0008g03430	4.43807	5.07153	5.21101	4.29597	5.49175	4.95544
VIT_01s0011g06270	5.50176	4.62605	5.52377	4.75186	5.71149	4.95358
VIT_13s0067g02050	-7.22882	5.57844	3.9982	1.09536	6.35755	4.95218
VIT_14s0081g00710	4.74255	4.68145	5.85383	6.28885	5.52398	4.94845
VIT_06s0009g00340	4.37342	4.74953	4.06408	3.69414	3.90785	4.94673
VIT_19s0014g02190	3.04789	4.4522	3.90432	3.52231	4.28516	4.94564
VIT_06s0080g00750	5.68323	4.6893	4.26078	5.20841	4.39071	4.94423
VIT_18s0001g09190	3.78311	4.65287	3.45812	2.96778	3.09029	4.94423
VIT_04s0008g05600	4.8766	4.66278	3.95606	5.4701	4.21335	4.94173
VIT_01s0146g00100	5.18903	3.69822	4.32697	4.20711	3.32865	4.93483
VIT_05s0094g01210	5.34767	5.4112	5.90825	5.97231	6.3708	4.9342
VIT_18s0001g07640	5.42425	4.01048	4.65363	5.35438	3.47811	4.93389
VIT_19s0014g02860	3.20945	4.7221	5.91281	4.74147	5.45154	4.93263
VIT_05s0062g01220	4.13723	4.81472	5.08123	4.66278	5.16899	4.9309
VIT_04s0008g01020	4.25399	4.65916	5.28553	4.72865	4.82273	4.93074
VIT_18s0001g02340	4.98018	4.83845	5.08576	4.71021	5.59455	4.92853
VIT_05s0020g03690	4.0072	4.23675	4.56417	3.95915	3.64501	4.92695
VIT_07s0031g02840	5.41436	5.66021	5.62137	4.42335	6.17146	4.92473
VIT_01s0011g05360	6.04636	5.77039	4.59674	6.0282	5.27588	4.92473
VIT_09s0018g00620	6.18342	4.49356	5.90681	6.74133	5.63498	4.92109
VIT_12s0057g00220	5.45998	5.24501	4.86427	6.24767	5.73182	4.91791
VIT_14s0060g01010	4.0009	3.94423	4.22162	5.2062	4.19246	4.91791
VIT_06s0009g03170	3.78485	4.51707	5.07068	3.89336	4.62352	4.91441
VIT_10s0003g04100	5.78973	3.76801	4.22702	5.60654	4.02532	4.91345
VIT_05s0102g01120	5.57228	5.2075	4.98717	6.16698	5.4836	4.91265
VIT_19s0015g00130	6.07553	4.61039	5.98239	5.74443	5.3634	4.91265
VIT_05s0020g04000	5.00944	6.1336	6.00143	4.77961	6.45116	4.91201
VIT_06s0004g04550	6.62205	5.7658	5.08406	6.90497	5.87881	4.91201
VIT_07s0005g00850	5.45779	4.18745	5.07895	5.6198	4.40508	4.90881
VIT_05s0077g01150	-6.64386	1.02857	4.06982	0.106572	4.36737	4.90801
VIT_11s0118g00220	3.85233	4.96039	4.47552	4.0006	3.80219	4.90721
VIT_01s0010g02290	2.5656	5.80349	6.39946	4.14866	6.69984	4.90641
VIT_06s0004g00160	3.97269	5.07724	5.17539	4.33795	4.97468	4.90272
VIT_09s0002g00200	5.94384	4.55008	4.8212	5.11367	4.72574	4.90175
VIT_12s0057g01110	4.60684	2.87053	2.80254	4.1592	1.32385	4.90079
VIT_14s0066g01920	3.70229	4.92362	4.93546	5.13545	5.32721	4.9003
VIT_16s0039g02750	4.72756	4.68743	5.54154	4.2193	5.50547	4.90014
VIT_01s0127g00360	4.50927	5.08548	5.65983	4.25147	5.56468	4.89982
VIT_01s0010g03890	5.89312	5.41007	4.57592	5.85033	5.14731	4.89708
VIT_13s0067g02440	3.86856	4.54556	4.86162	4.31107	4.49548	4.89708
VIT_15s0048g01920	4.23726	5.10685	4.68893	4.33533	4.50631	4.89288
VIT_01s0026g01380	3.61706	0.847997	3.77786	1.95606	2.22548	4.89223
VIT_09s0002g06770	3.58816	4.51728	4.40077	3.22651	3.84532	4.89174
VIT_12s0057g01330	6.69928	5.77584	5.39209	7.55712	6.06329	4.89126
VIT_03s0063g01030	4.02444	4.90384	5.73597	4.77505	6.01063	4.89061
VIT_01s0011g04330	4.21723	5.35321	5.41165	4.79995	5.65363	4.89028
VIT_03s0038g00910	4.01852	4.32649	5.04774	4.39757	4.24539	4.88947
VIT_08s0007g00780	5.46369	5.04934	5.16484	6.03239	5.25663	4.88866
VIT_11s0052g01250	8.98208	7.71406	5.6603	9.41854	7.63312	4.88785
VIT_18s0001g02570	5.90617	5.47346	4.55131	5.90769	5.33759	4.88622
VIT_04s0008g06130	5.47735	4.99985	4.7761	6.30943	4.78328	4.88574
VIT_09s0002g01170	2.85864	4.75453	3.36036	3.774	2.50589	4.88574
VIT_17s0000g07280	4.93687	4.80133	3.76977	4.73751	4.1049	4.88509
VIT_04s0023g03010	5.92734	5.53937	4.70081	6.47514	5.38336	4.88492
VIT_06s0004g02850	8.48568	5.99337	2.7034	8.00341	5.26591	4.88346
VIT_05s0020g01810	5.65554	4.67751	4.22419	4.87496	4.20033	4.88346
[truncated: 6,686 more rows]

## Sheet: Sheet3
	S5/S6 specific
		S5-CARLOS-ave	S6-CARLOS-ave	S7-CARLOS-ave	S5-NOB-ave	S6-NOB-ave	S7-NOB-ave
	VIT_04s0008g04440	10.5804	-2.5009	-0.315929	9.8307	3.26253	-0.643856
	VIT_09s0054g00690	9.72793	-0.570607	-2.22882	7.53078	1.66448	-1.44746
	VIT_11s0037g00530	9.7068	0.99035	-1.06895	8.36459	2.66978	-1.17354
	VIT_07s0005g04110	9.37287	1.55582	-1.64386	8.65381	2.69896	-1.32193
	VIT_18s0001g05580	8.92219	-1.02915	-1.26303	4.29205	-1.35845	-2.58496
	VIT_10s0003g01560	8.87502	1.39872	-0.962032	8.15725	2.17739	-0.934198
	VIT_07s0031g00110	8.77745	3.01673	-1.78588	8.54326	3.3914	0.728283
	VIT_01s0011g05200	8.65003	3.73949	-2.29808	8.14177	3.07382	-2.73697
	VIT_02s0025g00740	8.46771	-0.37707	-1.58496	5.9479	0.306457	-2.64386
	VIT_06s0061g01380	8.43754	4.54019	-1.88897	8.67265	2.80941	-0.17897				S5-CARLOS-ave	S6-CARLOS-ave	S7-CARLOS-ave	S5-NOB-ave	S6-NOB-ave	S7-NOB-ave
	VIT_04s0023g01600	8.33683	-0.17897	-2.8365	7.18411	0.736966	-3.01937			VIT_06s0080g00760	8.15088	-0.888969	-1.06895	5.29487	0.943609	-0.125531
	VIT_14s0083g01150	8.17589	-0.309955	-3.05889	5.70543	0.552541	-2.03899
	VIT_06s0080g00760	8.15088	-0.888969	-1.06895	5.29487	0.943609	-0.125531
	VIT_10s0003g01550	8.04936	-0.40227	-2.90689	3.16027	-1.09954	-1.08927
	VIT_05s0062g01260	7.9405	-0.827939	-3.8365	6.25399	-0.240134	-4.90689
	VIT_06s0004g07900	7.87082	-1.81943	-2.80255	3.94298	-3.70526	-2.37084
	VIT_16s0022g02200	7.82881	3.82782	-1.13079	6.0174	1.62293	-0.658963
	VIT_11s0016g05830	7.6268	0.294743	-1	2.00839	-1	-1
	VIT_05s0020g00420	7.48537	-3.37084	-5.05889	3.255	-5.05889	-4.14136
	VIT_10s0042g00080	7.41066	-1	-4.90689	3.4807	-1.88897	-1
	VIT_11s0103g00190	7.18907	-0.125531	-1	4.99684	0.180572	-2.80255
	VIT_14s0108g00420	7.05499	1.24894	-2.39593	1.65688	-0.681924	-0.67423
	VIT_08s0058g00350	7.02407	-2.47393	-3.22882	6.98459	0.687061	-3.64386
	VIT_13s0064g01660	7.00604	-4.22882	-3.14136	6.8672	-0.184425	-3.14136
	VIT_16s0100g00230	6.98516	-3.90689	-2.98089	6.68986	0.102098	-3.27462
	VIT_09s0002g04840	6.98098	1.80873	-2.39593	2.20268	-1	0.728283					S5-CARLOS-ave	S6-CARLOS-ave	S7-CARLOS-ave	S5-NOB-ave	S6-NOB-ave	S7-NOB-ave
	VIT_11s0016g05840	6.94743	-0.340075	-3.32193	5.72165	0.745596	-1.03899				VIT_10s0003g01550	8.04936	-0.40227	-2.90689	3.16027	-1.09954	-1.08927
	VIT_06s0004g02710	6.93546	-0.315929	-2.58496	6.46972	0.629162	-3.42146
	VIT_13s0019g01920	6.91791	-1.42146	-4.42146	4.3852	-0.104697	-1
	VIT_16s0050g01620	6.89061	0.367371	-3.14136	4.58436	-1.01937	-1.67423
	VIT_12s0134g00140	6.85391	-1.94342	-3.22882	6.90143	0.400538	-4.32193
	VIT_18s0001g02540	6.77979	-0.713119	1.17845	4.34412	0.861294	-0.217591
	VIT_18s0001g06690	6.73127	0	-1	4.09761	-2.05889	-6.22882			1	VITVI|EnsemblGenome=VIT_01s0026g00350|UniProtKB=F6HPM4	VIT_01s0026g00350	bHLH-MYC_N domain-containing protein	BHLH-MYC_N DOMAIN-CONTAINING PROTEIN (PTHR46633:SF3)	DNA-binding transcription factor	Vitis vinifera
	VIT_03s0038g01410	6.66259	-1.334	0.0749621	6.25487	1.34483	1.96224						VIT_01s0026g00350
	VIT_01s0026g00350	6.63377	1.1375	-2.98089	5.43763	0.176323	-3.42146						ortholog
	VIT_04s0043g00300	6.59256	-3.18442	-4.14136	3.60684	-2.25154	-1				2	VITVI|EnsemblGenome=VIT_16s0050g01620|UniProtKB=F6H6M1	VIT_16s0050g01620	ABC transporter domain-containing protein	ABC TRANSPORTER G FAMILY MEMBER 8 (PTHR48041:SF27)	ATP-binding cassette (ABC) transporter	Vitis vinifera
	VIT_13s0067g01180	6.56504	-0.223194	-1.72102	5.22818	-0.136062	-0.395929							VIT_16s0050g01620
														ortholog
											3	VITVI|EnsemblGenome=VIT_05s0062g01260|UniProtKB=D7U9P1	VIT_05s0062g01260	AAI domain-containing protein	AAI DOMAIN-CONTAINING PROTEIN (PTHR33122:SF63)	-	Vitis vinifera
														VIT_05s0062g01260
														ortholog
											4	VITVI|EnsemblGenome=VIT_06s0080g00760|UniProtKB=A5BY12	VIT_06s0080g00760	Uncharacterized protein	-	-	Vitis vinifera
														VIT_06s0080g00760
	S6/S7 specfic													ortholog
		S5-CARLOS-ave	S6-CARLOS-ave	S7-CARLOS-ave	S5-NOB-ave	S6-NOB-ave	S7-NOB-ave				5	VITVI|EnsemblGenome=VIT_04s0043g00300|UniProtKB=F6HI06	VIT_04s0043g00300	TPX2 domain-containing protein	TPX2 DOMAIN-CONTAINING PROTEIN (PTHR14326:SF39)	non-motor microtubule binding protein	Vitis vinifera
	VIT_19s0177g00090	-2.20645	14.0622	5.74066	11.0451	12.9742	11.5958							VIT_04s0043g00300
	VIT_12s0028g01180	-5.05889	13.5456	8.19139	7.06605	12.0834	12.225							ortholog
	VIT_14s0128g00200	-5.22882	13.4972	10.1598	6.28145	12.3684	11.3349				6	VITVI|EnsemblGenome=VIT_11s0016g05830|UniProtKB=F6HHB2	VIT_11s0016g05830	Uncharacterized protein	-	-	Vitis vinifera
	VIT_06s0004g02560	-2.20645	12.5917	13.2241	7.65086	11.0388	13.5442							VIT_11s0016g05830
	VIT_19s0093g00190	0.425817	11.6898	5.71406	4.55663	5.43729	12.3543							ortholog
	VIT_19s0090g01370	-3.52838	10.5419	8.58965	5.29793	10.2202	10.089				7	VITVI|EnsemblGenome=VIT_07s0005g04110|UniProtKB=F6HZP8	VIT_07s0005g04110	Cellulose synthase	CELLULOSE SYNTHASE A CATALYTIC SUBUNIT 4 [UDP-FORMING] (PTHR13301:SF91)	DNA-binding transcription factor	Vitis vinifera
	VIT_11s0052g01230	-0.0689474	9.66267	3.95884	4.21179	8.28421	8.02085							VIT_07s0005g04110
	VIT_05s0049g01780	-1.85378	9.57479	8.01571	6.33783	8.95933	8.55104							ortholog
	VIT_06s0004g03260	-6.64386	9.52976	7.17898	6.33426	8.38972	7.59151				8	VITVI|EnsemblGenome=VIT_13s0064g01660|UniProtKB=D7T2U5	VIT_13s0064g01660	Uncharacterized protein	BETA-GLUCOSIDASE 17 (PTHR10353:SF44)	glycosidase	Vitis vinifera
	VIT_12s0059g02350	-1	8.14502	5.24577	6.03423	7.27311	5.17126							VIT_13s0064g01660
	VIT_05s0077g01930	-5.05889	7.89445	2.25197	8.98743	6.18276	5.89805							ortholog
	VIT_07s0005g05400	-5.90689	7.39318	5.9465	6.42978	6.56428	6.11714				9	VITVI|EnsemblGenome=VIT_06s0061g01380|UniProtKB=A5C6X0	VIT_06s0061g01380	Stress-response A/B barrel domain-containing protein	STRESS-RESPONSE A/B BARREL DOMAIN-CONTAINING PROTEIN (PTHR33178:SF4)	-	Vitis vinifera
														VIT_06s0061g01380
	VIT_13s0019g02150	2.23573	-7.22882	-1	-1.73697	-5.42146	-1							ortholog
	VIT_11s0016g00330	3.6198	-6.64386	-6.64386	4.77259	-4.64386	-1				10	VITVI|EnsemblGenome=VIT_12s0134g00140|UniProtKB=D7SQP4	VIT_12s0134g00140	Terpene_synth_C domain-containing protein	-	-	Vitis vinifera
	VIT_14s0108g01010	1.3599	-6.64386	-1	-0.447459	-1	-1							VIT_12s0134g00140
	VIT_01s0010g03060	3.04089	-5.64386	-4.76939	-0.184425	-3.64386	-1							ortholog
	VIT_02s0025g00320	2.12212	-5.64386	-1	2.68032	-2.44746	-1				11	VITVI|EnsemblGenome=VIT_07s0031g00110|UniProtKB=F6H4H2	VIT_07s0031g00110	Polysacc_synt_4 domain-containing protein	PROTEIN IRX15-LIKE (PTHR31444:SF8)	-	Vitis vinifera
	VIT_12s0134g00090	4.18534	-5.42146	-1	4.04527	-2.55639	-1							VIT_07s0031g00110
	VIT_04s0008g04160	5.71516	-5.42146	-1.72102	0.522725	-0.500898	-4.76939							ortholog
	VIT_12s0059g01790	3.71991	-5.22882	-1	2.66676	-3.90689	-1				12	VITVI|EnsemblGenome=VIT_18s0001g05580|UniProtKB=E0CRK2	VIT_18s0001g05580	Uncharacterized protein	E3 UBIQUITIN-PROTEIN LIGASE (PTHR14791:SF42)	-	Vitis vinifera
	VIT_11s0103g00040	3.38221	-5.22882	-1	0.522725	-1	-1							VIT_18s0001g05580
														ortholog
											13	VITVI|EnsemblGenome=VIT_02s0025g00740|UniProtKB=F6HUP7	VIT_02s0025g00740	Dirigent protein	DIRIGENT PROTEIN (PTHR46442:SF4)	protein-binding activity modulator	Vitis vinifera
														VIT_02s0025g00740
														ortholog
	S7 specific										14	VITVI|EnsemblGenome=VIT_18s0001g06690|UniProtKB=E0CRR0	VIT_18s0001g06690	Fe2OG dioxygenase domain-containing protein	FE2OG DIOXYGENASE DOMAIN-CONTAINING PROTEIN (PTHR10209:SF460)	oxidoreductase	Vitis vinifera
		S5-CARLOS-ave	S6-CARLOS-ave	S7-CARLOS-ave	S5-NOB-ave	S6-NOB-ave	S7-NOB-ave							VIT_18s0001g06690
	VIT_03s0063g01290	-3.52838	6.69056	13.4141	6.77645	9.44581	8.76531							ortholog
	VIT_04s0008g04060	-1	-1.38333	10.604	8.12129	10.435	0.0473057				15	VITVI|EnsemblGenome=VIT_13s0019g01920|UniProtKB=D7TLR5	VIT_13s0019g01920	Laccase	FI03373P-RELATED (PTHR11709:SF438)	oxidase	Vitis vinifera
	VIT_05s0049g00760	-5.64386	-1.14136	9.38576	4.31445	9.28909	-1.06895							VIT_13s0019g01920
	VIT_06s0004g05310	0.450661	-1.52838	7.60743	2.3914	5.05629	-2.09954							ortholog
	VIT_02s0025g04310	-0.152003	4.32024	7.54117	2.03562	5.06278	6.70681				16	VITVI|EnsemblGenome=VIT_04s0023g01600|UniProtKB=D7SPF5	VIT_04s0023g01600	Uncharacterized protein	TRANSMEMBRANE PROTEIN TAUE-RELATED (PTHR14255:SF31)	ubiquitin-protein ligase	Vitis vinifera
	VIT_06s0004g05380	1.55582	-1.80255	7.4511	2.45066	5.48478	-1.51457							VIT_04s0023g01600
	VIT_06s0004g05330	-0.352302	-3.8365	7.44761	1.74416	5.63042	-3.70526							ortholog
	VIT_06s0004g05320	-0.263034	-3.14136	7.06052	1.83458	5.11075	-3.90689				17	VITVI|EnsemblGenome=VIT_14s0108g00420|UniProtKB=D7SX91	VIT_14s0108g00420	BHLH domain-containing protein	TRANSCRIPTION FACTOR PRE2 (PTHR46446:SF28)	basic helix-loop-helix transcription factor	Vitis vinifera
	VIT_14s0128g00570	-3.47393	-2	6.40775	0.461179	0.874469	-1.75309							VIT_14s0108g00420
	VIT_03s0063g01220	-1	-1.46063	5.15826	-0.304006	1.19114	0.488858							ortholog
	VIT_07s0031g01260	-1	-2.73697	4.58777	-0.980891	3.07895	-4.22882				18	VITVI|EnsemblGenome=VIT_09s0054g00690|UniProtKB=D7SS22	VIT_09s0054g00690	Uncharacterized protein	LEGUMAIN (PTHR12000:SF42)	cysteine protease	Vitis vinifera
														VIT_09s0054g00690
														ortholog
	VIT_06s0004g01300	-5.42146	2.94735	-7.22882	-1.98089	-3.14136	1.64				19	VITVI|EnsemblGenome=VIT_05s0020g00420|UniProtKB=F6HE14	VIT_05s0020g00420	Uncharacterized protein	OS05G0279900 PROTEIN (PTHR31375:SF26)	-	Vitis vinifera
	VIT_10s0003g05420	4.42984	2.22342	-4.90689	2.45505	-0.962032	-5.64386							VIT_05s0020g00420
	VIT_17s0053g00070	-3.22882	2.24184	-4.76939	-1.87127	0.892715	0.834576							ortholog
	VIT_07s0031g02740	1.57854	2.15597	-4.76939	0.931053	-0.17897	-0.17897				20	VITVI|EnsemblGenome=VIT_11s0037g00530|UniProtKB=D7U1D5	VIT_11s0037g00530	Cellulose synthase	CELLULOSE SYNTHASE A CATALYTIC SUBUNIT 7 [UDP-FORMING] (PTHR13301:SF28)	DNA-binding transcription factor	Vitis vinifera
	VIT_08s0058g01010	5.21555	2.02739	-4.76939	5.09353	0.931053	-3.14136							VIT_11s0037g00530
	VIT_05s0062g01100	-1.26303	1.39872	-4.76939	3.65992	1.05658	-5.64386							ortholog
											21	VITVI|EnsemblGenome=VIT_18s0001g02540|UniProtKB=E0CR50	VIT_18s0001g02540	Response regulatory domain-containing protein	RESPONSE REGULATORY DOMAIN-CONTAINING PROTEIN (PTHR43874:SF96)	winged helix/forkhead transcription factor	Vitis vinifera
														VIT_18s0001g02540
														ortholog
											22	VITVI|EnsemblGenome=VIT_14s0083g01150|UniProtKB=D7SMP7	VIT_14s0083g01150	COBRA-like protein	COBRA-LIKE PROTEIN 4 (PTHR31673:SF23)	-	Vitis vinifera
														VIT_14s0083g01150
														ortholog
	Nobel S5/S6										23	VITVI|EnsemblGenome=VIT_10s0003g01550|UniProtKB=F6HMB1	VIT_10s0003g01550	Uncharacterized protein	OS01G0750400 PROTEIN (PTHR48064:SF1)	-	Vitis vinifera
														VIT_10s0003g01550
	VIT_09s0002g07140	1.77961	-1	-1.20645	9.21578	2.69525	-1							ortholog
	VIT_08s0007g01910	5.73109	1.78101	-2.94342	8.19047	1.70487	-2.94342				24	VITVI|EnsemblGenome=VIT_01s0011g05200|UniProtKB=F6HFG8	VIT_01s0011g05200	Methyltransf_11 domain-containing protein	METHYLTRANSF_25 DOMAIN-CONTAINING PROTEIN (PTHR44307:SF2)	methyltransferase	Vitis vinifera
	VIT_14s0066g01960	-1.01937	-0.563483	-0.845114	7.48107	1.14839	-0.125531							VIT_01s0011g05200
	VIT_04s0023g01600	8.33683	-0.17897	-2.8365	7.18411	0.736966	-3.01937							ortholog
	VIT_04s0023g02570	7.73994	0.0976108	-1.34618	7.09332	1.15272	-0.528379				25	VITVI|EnsemblGenome=VIT_11s0103g00190|UniProtKB=D7UBL5	VIT_11s0103g00190	Uncharacterized protein	PHOSPHOLIPASE A2-ALPHA (PTHR11716:SF47)	phospholipase	Vitis vinifera
	VIT_03s0038g02050	9.4922	3.27749	-0.556393	7.06609	2.1635	0.443607							VIT_11s0103g00190
	VIT_02s0025g03320	7.18064	1.63382	1.6198	7.05561	1.59932	3.60526							ortholog
	VIT_09s0002g05320	2.97085	-1.65896	-3.98089	7.00566	0.407806	-1				26	VITVI|EnsemblGenome=VIT_06s0004g07900|UniProtKB=D7SJK5	VIT_06s0004g07900	OVATE domain-containing protein	TRANSCRIPTION REPRESSOR OFP17 (PTHR34042:SF1)	-	Vitis vinifera
	VIT_09s0002g06610	-1.90689	-1	-4.05889	7.00443	-0.17897	-1							VIT_06s0004g07900
	VIT_02s0025g03680	7.25622	2.84398	1.34672	6.95706	2.81831	2.07382							ortholog
	VIT_12s0134g00140	6.85391	-1.94342	-3.22882	6.90143	0.400538	-4.32193				27	VITVI|EnsemblGenome=VIT_13s0067g01180|UniProtKB=F6HCB8	VIT_13s0067g01180	PMR5N domain-containing protein	PMR5N DOMAIN-CONTAINING PROTEIN (PTHR32285:SF10)	-	Vitis vinifera
	VIT_13s0064g01660	7.00604	-4.22882	-3.14136	6.8672	-0.184425	-3.14136							VIT_13s0067g01180
	VIT_13s0067g01200	-4.05889	-1	-6.22882	6.85632	0.389567	-1							ortholog
	VIT_12s0035g00650	-1	-2.87127	-5.90689	6.84059	0.443607	-2.52838				28	VITVI|EnsemblGenome=VIT_11s0016g05840|UniProtKB=F6HHB3	VIT_11s0016g05840	AAI domain-containing protein	AAI DOMAIN-CONTAINING PROTEIN (PTHR31731:SF1)	-	Vitis vinifera
	VIT_16s0100g00230	6.98516	-3.90689	-2.98089	6.68986	0.102098	-3.27462							VIT_11s0016g05840
	VIT_10s0405g00040	4.61843	-0.467267	-2.94342	6.6843	0.604071	-1							ortholog
	VIT_04s0044g00190	8.24658	2.05889	-1.62891	6.6704	1.70044	0.665999				29	VITVI|EnsemblGenome=VIT_10s0003g01560|UniProtKB=D7TJP0	VIT_10s0003g01560	Cellulose synthase	CELLULOSE SYNTHASE A CATALYTIC SUBUNIT 8 [UDP-FORMING] (PTHR13301:SF31)	DNA-binding transcription factor	Vitis vinifera
														VIT_10s0003g01560
														ortholog
											30	VITVI|EnsemblGenome=VIT_03s0038g01410|UniProtKB=F6I152	VIT_03s0038g01410	Uncharacterized protein	AQUAPORIN-LIKE (PTHR47002:SF2)	-	Vitis vinifera
	VIT_07s0005g05890	-1	-0.389615	-3.47393	-4.22882	0.389567	-1.55639							VIT_03s0038g01410
	VIT_12s0028g03260	-1	2.63072	-1	-3.47393	1.926	-0.109878							ortholog
	VIT_08s0032g00240	-2.20645	0.47854	1.35238	-3.42146	0.613532	1.78938				31	VITVI|EnsemblGenome=VIT_08s0058g00350|UniProtKB=F6GXU3	VIT_08s0058g00350	Uncharacterized protein	GAMMA INTERFERON RESPONSIVE LYSOSOMAL THIOL (GILT) REDUCTASE FAMILY PROTEIN (PTHR13234:SF48)	reductase	Vitis vinifera
	VIT_12s0057g00060	-0.827939	2.94361	3.9785	-3.22882	2.20581	3.38221							VIT_08s0058g00350
	VIT_02s0025g02920	-6.64386	-3.14136	2.21826	-3.22882	0.385891	-1.17354							ortholog
	VIT_01s0010g00760	-1.76939	-2.09954	-0.785875	-3.22882	0.159199	-1.152				32	VITVI|EnsemblGenome=VIT_04s0008g04440|UniProtKB=D7SUJ8	VIT_04s0008g04440	Uncharacterized protein	SUBFAMILY NOT NAMED (PTHR36312:SF3)	-	Vitis vinifera
														VIT_04s0008g04440
														ortholog
											33	VITVI|EnsemblGenome=VIT_16s0022g02200|UniProtKB=F6HAR0	VIT_16s0022g02200	Uncharacterized protein	SUBTILISIN-LIKE PROTEASE SBT1.3 (PTHR10795:SF322)	serine protease	Vitis vinifera
														VIT_16s0022g02200
														ortholog
											34	VITVI|EnsemblGenome=VIT_10s0042g00080|UniProtKB=D7TES0	VIT_10s0042g00080	Peroxidase	PEROXIDASE (PTHR31517:SF59)	-	Vitis vinifera
														VIT_10s0042g00080
														ortholog
											35	VITVI|EnsemblGenome=VIT_06s0004g02710|UniProtKB=D7SKZ8	VIT_06s0004g02710	TPT domain-containing protein	UDP-XYLOSE TRANSPORTER 1 (PTHR11132:SF257)	secondary carrier transporter	Vitis vinifera
														VIT_06s0004g02710
														ortholog
											36	VITVI|EnsemblGenome=VIT_09s0002g04840|UniProtKB=F6HX25	VIT_09s0002g04840	Uncharacterized protein	THIONIN-LIKE PROTEIN-RELATED (PTHR36312:SF1)	-	Vitis vinifera
														VIT_09s0002g04840
														ortholog
											37	VITVI|EnsemblGenome=VIT_16s0100g00230|UniProtKB=F6HP77	VIT_16s0100g00230	GMC_OxRdtase_N domain-containing protein	GMC_OXRDTASE_N DOMAIN-CONTAINING PROTEIN (PTHR45968:SF31)	-	Vitis vinifera
														VIT_16s0100g00230
														ortholog
	Nobel S6/S7
		S5-CARLOS-ave	S6-CARLOS-ave	S7-CARLOS-ave	S5-NOB-ave	S6-NOB-ave	S7-NOB-ave
	VIT_07s0005g03400	-1	7.72069	4.17446	1.26704	6.90436	5.77215
	VIT_02s0012g02190	1.46118	6.11742	6.97587	2.56965	6.77268	5.10392
	VIT_08s0007g04000	-5.05889	6.09255	4.49783	0.578536	4.31082	3.7456
	VIT_13s0074g00610	-1	5.58185	2.01911	-0.777608	4.30378	4.97116
	VIT_16s0022g01190	-1	3.43918	7.50157	0.931053	4.23624	5.36784
	VIT_11s0052g01190	0.549258	3.95513	5.13244	0.568843	4.13778	-0.0439433
	VIT_12s0057g01030	1.79216	-5.42146	-1	0.359896	-7.22882	-5.90689
	VIT_04s0044g01150	-6.64386	-3.32193	-1	0.20581	-6.64386	-3.70526
	VIT_12s0028g02630	2.33724	-2.32193	-1	1.61667	-6.22882	-1
	VIT_01s0011g03720	-0.434403	-1	-1	1.41864	-6.22882	-1
	VIT_01s0011g02240	2.81216	-1	-1	-1.03899	-6.22882	-1
	VIT_14s0219g00030	-1.92504	-4.42146	-1	1.6477	-6.64386	-1
	VIT_04s0008g05080	-0.980891	-2.18442	-5.64386	0.400538	-6.64386	-2.25154
	VIT_19s0014g01600	1.53439	-1	-6.22882	1.03562	-5.90689	-1
	VIT_03s0091g00280	-0.352302	-2.94342	-5.05889	0.958533	-5.90689	-2.07907
	VIT_17s0000g04830	0.678072	-3.90689	-4.64386	0.163499	-5.90689	-5.64386					S6/S7 specific Carlos
	VIT_19s0027g01880	0.509274	-6.64386	-1	-0.298081	-5.90689	-1
													Uncharacterized protein	ACETYLSEROTONIN O-METHYLTRANSFERASE (PTHR11746:SF254)	methyltransferase	Vitis vinifera
												VIT_12s0059g01790	VIT_12s0059g01790
													ortholog
													2	VITVI|EnsemblGenome=VIT_11s0103g00040|UniProtKB=D7UBM6	VIT_11s0103g00040	Uncharacterized protein	-	-	Vitis vinifera
																VIT_11s0103g00040
	Nobel S7															ortholog
													3	VITVI|EnsemblGenome=VIT_04s0008g04160|UniProtKB=F6H3F1	VIT_04s0008g04160	BURP domain-containing protein	BURP DOMAIN PROTEIN RD22 (PTHR31236:SF2)	-	Vitis vinifera
	VIT_16s0022g01020	-1	4.45965	5.16979	-0.0588937	2.0368	6.25582									VIT_04s0008g04160
	VIT_06s0009g02920	3.03914	5.00779	2.6151	3.96594	1.80047	6.05478									ortholog
	VIT_18s0089g00170	-0.643856	-0.827939	-1.70526	0.790772	-2.80255	3.973						4	VITVI|EnsemblGenome=VIT_12s0134g00090|UniProtKB=D7SQP0	VIT_12s0134g00090	Terpene_synth_C domain-containing protein	-	-	Vitis vinifera
	VIT_17s0000g02700	-1.22882	-0.251539	-0.514573	-3.32193	-3.18442	3.90464									VIT_12s0134g00090
																ortholog
	VIT_07s0129g00190	-0.173536	-3.70526	-1.67423	1.30061	-0.819428	-8.22882						5	VITVI|EnsemblGenome=VIT_14s0108g01010|UniProtKB=F6H5U7	VIT_14s0108g01010	Uncharacterized protein	TRANSCRIPTION FACTOR CSA (PTHR45614:SF217)	-	Vitis vinifera
	VIT_06s0004g05250	-1	-0.200913	-5.22882	2.80735	1.49057	-6.64386									VIT_14s0108g01010
	VIT_04s0008g01530	-3.90689	-3.8365	-0.67423	-1.68966	2.39506	-6.64386									ortholog
	VIT_08s0056g01480	4.86047	-0.109878	-2.55639	4.70395	1.79632	-6.64386						6	VITVI|EnsemblGenome=VIT_11s0016g00330|UniProtKB=F6HGZ4	VIT_11s0016g00330	Pectinesterase	PECTINESTERASE/PECTINESTERASE INHIBITOR 54-RELATED (PTHR31707:SF11)	esterase	Vitis vinifera
																VIT_11s0016g00330
																ortholog
													7	VITVI|EnsemblGenome=VIT_02s0025g00320|UniProtKB=D7TV59	VIT_02s0025g00320	Uncharacterized protein	MYB TRANSCRIPTION FACTOR (PTHR47997:SF31)	-	Vitis vinifera
																VIT_02s0025g00320
																ortholog
													8	VITVI|EnsemblGenome=VIT_01s0010g03060|UniProtKB=D7TAS9	VIT_01s0010g03060	Uncharacterized protein	SUBFAMILY NOT NAMED (PTHR34280:SF15)	-	Vitis vinifera
																VIT_01s0010g03060
																ortholog
													9	VITVI|EnsemblGenome=VIT_13s0019g02150|UniProtKB=F6HNU7	VIT_13s0019g02150	Laccase	FI03373P-RELATED (PTHR11709:SF438)	oxidase	Vitis vinifera
																VIT_13s0019g02150
																ortholog
												S7 specific
													1	VITVI|EnsemblGenome=VIT_06s0004g01300|UniProtKB=F6GUE4	VIT_06s0004g01300	Uncharacterized protein	PROTEIN NRT1/ PTR FAMILY 7.1 (PTHR11654:SF331)	transporter	Vitis vinifera
																VIT_06s0004g01300
																ortholog
														2	VITVI|EnsemblGenome=VIT_05s0062g01100|UniProtKB=F6I4A1	VIT_05s0062g01100	Protein kinase domain-containing protein	LEUCINE-RICH REPEAT RECEPTOR PROTEIN KINASE MSP1 (PTHR48055:SF11)	transmembrane signal receptor	Vitis vinifera
																	VIT_05s0062g01100
																	ortholog
														3	VITVI|EnsemblGenome=VIT_14s0128g00570|UniProtKB=A8QK93	VIT_14s0128g00570	Germin-like protein	GERMIN-LIKE PROTEIN SUBFAMILY 1 MEMBER 16-RELATED (PTHR31238:SF237)	-	Vitis vinifera
																	GER7
																	ortholog
														4	VITVI|EnsemblGenome=VIT_03s0063g01290|UniProtKB=D7TPR3	VIT_03s0063g01290	Fe2OG dioxygenase domain-containing protein	FE2OG DIOXYGENASE DOMAIN-CONTAINING PROTEIN (PTHR10209:SF625)	oxidoreductase	Vitis vinifera
																	VIT_03s0063g01290
																	ortholog
														5	VITVI|EnsemblGenome=VIT_05s0049g00760|UniProtKB=Q6VEQ6	VIT_05s0049g00760	Putative ripening-induced protein 1	EARLY NODULIN-75-LIKE (PTHR34629:SF1)	-	Vitis vinifera
																	mrip1
																	ortholog
														6	VITVI|EnsemblGenome=VIT_06s0004g05380|UniProtKB=D7SK90	VIT_06s0004g05380	Uncharacterized protein	SENESCENCE-ASSOCIATED PROTEIN 13 (PTHR42898:SF79)	reductase	Vitis vinifera
																	VIT_06s0004g05380
																	ortholog
														7	VITVI|EnsemblGenome=VIT_10s0003g05420|UniProtKB=F6HM01	VIT_10s0003g05420	FAD-binding PCMH-type domain-containing protein	BERBERINE BRIDGE ENZYME-LIKE 26 (PTHR32448:SF35)	-	Vitis vinifera
																	VIT_10s0003g05420
																	ortholog
														8	VITVI|EnsemblGenome=VIT_07s0031g01260|UniProtKB=F6H4N9	VIT_07s0031g01260	Uncharacterized protein	BNAC01G00560D PROTEIN (PTHR34950:SF2)	-	Vitis vinifera
																	VIT_07s0031g01260
																	ortholog
														9	VITVI|EnsemblGenome=VIT_06s0004g05320|UniProtKB=D7SK98	VIT_06s0004g05320	Uncharacterized protein	SENESCENCE-ASSOCIATED PROTEIN 13 (PTHR42898:SF79)	reductase	Vitis vinifera
																	VIT_06s0004g05320
																	ortholog
														10	VITVI|EnsemblGenome=VIT_03s0063g01220|UniProtKB=D7TPQ6	VIT_03s0063g01220	Fe2OG dioxygenase domain-containing protein	-	-	Vitis vinifera
																	VIT_03s0063g01220
																	ortholog
														11	VITVI|EnsemblGenome=VIT_04s0008g04060|UniProtKB=F6H300	VIT_04s0008g04060	BURP domain-containing protein	BURP DOMAIN PROTEIN RD22 (PTHR31236:SF2)	-	Vitis vinifera
																	VIT_04s0008g04060
																	ortholog
														12	VITVI|EnsemblGenome=VIT_17s0053g00070|UniProtKB=F6HVR1	VIT_17s0053g00070	Uncharacterized protein	METAL-NICOTIANAMINE TRANSPORTER YSL8-RELATED (PTHR31645:SF76)	transporter	Vitis vinifera
																	VIT_17s0053g00070
																	ortholog
														13	VITVI|EnsemblGenome=VIT_06s0004g05310|UniProtKB=D7SK99	VIT_06s0004g05310	Uncharacterized protein	SENESCENCE-ASSOCIATED PROTEIN 13 (PTHR42898:SF79)	reductase	Vitis vinifera
																	VIT_06s0004g05310
																	ortholog
														14	VITVI|EnsemblGenome=VIT_07s0031g02740|UniProtKB=A5B062	VIT_07s0031g02740	Uncharacterized protein	OS02G0769100 PROTEIN (PTHR31374:SF228)	-	Vitis vinifera
																	VIT_07s0031g02740
																	ortholog
														15	VITVI|EnsemblGenome=VIT_06s0004g05330|UniProtKB=F6GUY3	VIT_06s0004g05330	Uncharacterized protein	SENESCENCE-ASSOCIATED PROTEIN 13 (PTHR42898:SF79)	reductase	Vitis vinifera
																	VIT_06s0004g05330
																	ortholog
														16	VITVI|EnsemblGenome=VIT_08s0058g01010|UniProtKB=F6GXY5	VIT_08s0058g01010	Uncharacterized protein	OS05G0335500 PROTEIN (PTHR33257:SF24)	-	Vitis vinifera
																	VIT_08s0058g01010
																	ortholog
														17	VITVI|EnsemblGenome=VIT_02s0025g04310|UniProtKB=F6HUG9	VIT_02s0025g04310	Uncharacterized protein	THAUMATIN-RELATED (PTHR31048:SF86)	-	Vitis vinifera
																	VIT_02s0025g04310
																	ortholog
													S5 specific Noble
													1	VITVI|EnsemblGenome=VIT_04s0023g02570|UniProtKB=F6GWS4	VIT_04s0023g02570	Peroxidase	PEROXIDASE 72 (PTHR31388:SF3)	peroxidase	Vitis vinifera
																VIT_04s0023g02570
																ortholog
														2	VITVI|EnsemblGenome=VIT_08s0007g01910|UniProtKB=D7THA7	VIT_08s0007g01910	Laccase	LACCASE-4 (PTHR11709:SF370)	oxidase	Vitis vinifera
																	VIT_08s0007g01910
																	ortholog
														3	VITVI|EnsemblGenome=VIT_09s0002g07140|UniProtKB=D7U148	VIT_09s0002g07140	Uncharacterized protein	SUBFAMILY NOT NAMED (PTHR36312:SF3)	-	Vitis vinifera
																	VIT_09s0002g07140
																	ortholog
														4	VITVI|EnsemblGenome=VIT_13s0064g01660|UniProtKB=D7T2U5	VIT_13s0064g01660	Uncharacterized protein	BETA-GLUCOSIDASE 17 (PTHR10353:SF44)	glycosidase	Vitis vinifera
																	VIT_13s0064g01660
																	ortholog
														5	VITVI|EnsemblGenome=VIT_12s0134g00140|UniProtKB=D7SQP4	VIT_12s0134g00140	Terpene_synth_C domain-containing protein	-	-	Vitis vinifera
																	VIT_12s0134g00140
																	ortholog
														6	VITVI|EnsemblGenome=VIT_09s0002g05320|UniProtKB=F6HX49	VIT_09s0002g05320	Fe2OG dioxygenase domain-containing protein	FE2OG DIOXYGENASE DOMAIN-CONTAINING PROTEIN (PTHR47990:SF153)	oxygenase	Vitis vinifera
																	VIT_09s0002g05320
																	ortholog
														7	VITVI|EnsemblGenome=VIT_08s0032g00240|UniProtKB=F6I3L7	VIT_08s0032g00240	Uncharacterized protein	CYTOCHROME P450 71D7 (PTHR47956:SF107)	oxygenase	Vitis vinifera
																	VIT_08s0032g00240
																	ortholog
														8	VITVI|EnsemblGenome=VIT_12s0028g03260|UniProtKB=F6H5F3	VIT_12s0028g03260	Aminotran_1_2 domain-containing protein	TYROSINE AMINOTRANSFERASE (PTHR45744:SF11)	transaminase	Vitis vinifera
																	VIT_12s0028g03260
																	ortholog
														9	VITVI|EnsemblGenome=VIT_03s0038g02050|UniProtKB=F6I119	VIT_03s0038g02050	Dirigent protein	DIRIGENT PROTEIN 23 (PTHR21495:SF80)	-	Vitis vinifera
																	VIT_03s0038g02050
																	ortholog
														10	VITVI|EnsemblGenome=VIT_04s0023g01600|UniProtKB=D7SPF5	VIT_04s0023g01600	Uncharacterized protein	TRANSMEMBRANE PROTEIN TAUE-RELATED (PTHR14255:SF31)	ubiquitin-protein ligase	Vitis vinifera
																	VIT_04s0023g01600
																	ortholog
														11	VITVI|EnsemblGenome=VIT_12s0057g00060|UniProtKB=F6HHI4	VIT_12s0057g00060	Uncharacterized protein	OS04G0635500 PROTEIN (PTHR33090:SF28)	-	Vitis vinifera
																	VIT_12s0057g00060
																	ortholog
														12	VITVI|EnsemblGenome=VIT_14s0066g01960|UniProtKB=F6HV36	VIT_14s0066g01960	ZnMc domain-containing protein	ZNMC DOMAIN-CONTAINING PROTEIN (PTHR10201:SF213)	metalloprotease	Vitis vinifera
																	VIT_14s0066g01960
																	ortholog
														13	VITVI|EnsemblGenome=VIT_02s0025g02920|UniProtKB=D7TVU3	VIT_02s0025g02920	Uncharacterized protein	CAFFEIC ACID 3-O-METHYLTRANSFERASE 1-LIKE (PTHR11746:SF151)	methyltransferase	Vitis vinifera
																	VIT_02s0025g02920
																	ortholog
														14	VITVI|EnsemblGenome=VIT_01s0010g00760|UniProtKB=D7TA96	VIT_01s0010g00760	Uncharacterized protein	-	-	Vitis vinifera
																	VIT_01s0010g00760
																	ortholog
														15	VITVI|EnsemblGenome=VIT_10s0405g00040|UniProtKB=F6GZA8	VIT_10s0405g00040	Cytochrome b561 and DOMON domain-containing protein	DOMON DOMAIN-CONTAINING PROTEIN (PTHR23130:SF167)	-	Vitis vinifera
																	VIT_10s0405g00040
																	ortholog
														16	VITVI|EnsemblGenome=VIT_02s0025g03680|UniProtKB=F6HUD5	VIT_02s0025g03680	Tubulin beta chain	TUBULIN BETA-8 CHAIN (PTHR11588:SF306)	tubulin	Vitis vinifera
																	VIT_02s0025g03680
																	ortholog
														17	VITVI|EnsemblGenome=VIT_12s0035g00650|UniProtKB=D7TGW2	VIT_12s0035g00650	Uncharacterized protein	-	-	Vitis vinifera
																	VIT_12s0035g00650
																	ortholog
														18	VITVI|EnsemblGenome=VIT_02s0025g03320|UniProtKB=F6HUB7	VIT_02s0025g03320	Uncharacterized protein	CYTOCHROME P450 86A7 (PTHR24296:SF2)	oxygenase	Vitis vinifera
																	VIT_02s0025g03320
																	ortholog
														19	VITVI|EnsemblGenome=VIT_09s0002g06610|UniProtKB=F6HXC3	VIT_09s0002g06610	Uncharacterized protein	POLYGALACTURONASE/GLYCOSIDE HYDROLASE FAMILY PROTEIN (PTHR31375:SF191)	-	Vitis vinifera
																	VIT_09s0002g06610
																	ortholog
														20	VITVI|EnsemblGenome=VIT_16s0100g00230|UniProtKB=F6HP77	VIT_16s0100g00230	GMC_OxRdtase_N domain-containing protein	GMC_OXRDTASE_N DOMAIN-CONTAINING PROTEIN (PTHR45968:SF31)	-	Vitis vinifera
																	VIT_16s0100g00230
																	ortholog
														21	VITVI|EnsemblGenome=VIT_13s0067g01200|UniProtKB=F6HCB7	VIT_13s0067g01200	Cellulase	ENDOGLUCANASE 15 (PTHR22298:SF125)	-	Vitis vinifera
																	VIT_13s0067g01200
																	ortholog
														22	VITVI|EnsemblGenome=VIT_04s0044g00190|UniProtKB=D7U461	VIT_04s0044g00190	PKS_ER domain-containing protein	CINNAMYL ALCOHOL DEHYDROGENASE 9-RELATED (PTHR42683:SF52)	oxidoreductase	Vitis vinifera
																	VIT_04s0044g00190
																	ortholog
														S5 specific nobel
														1	VITVI|EnsemblGenome=VIT_04s0023g02570|UniProtKB=F6GWS4	VIT_04s0023g02570	Peroxidase	PEROXIDASE 72 (PTHR31388:SF3)	peroxidase	Vitis vinifera
																	VIT_04s0023g02570
																	ortholog
															2	VITVI|EnsemblGenome=VIT_08s0007g01910|UniProtKB=D7THA7	VIT_08s0007g01910	Laccase	LACCASE-4 (PTHR11709:SF370)	oxidase	Vitis vinifera
																		VIT_08s0007g01910
																		ortholog
															3	VITVI|EnsemblGenome=VIT_09s0002g07140|UniProtKB=D7U148	VIT_09s0002g07140	Uncharacterized protein	SUBFAMILY NOT NAMED (PTHR36312:SF3)	-	Vitis vinifera
																		VIT_09s0002g07140
																		ortholog
															4	VITVI|EnsemblGenome=VIT_13s0064g01660|UniProtKB=D7T2U5	VIT_13s0064g01660	Uncharacterized protein	BETA-GLUCOSIDASE 17 (PTHR10353:SF44)	glycosidase	Vitis vinifera
																		VIT_13s0064g01660
																		ortholog
															5	VITVI|EnsemblGenome=VIT_12s0134g00140|UniProtKB=D7SQP4	VIT_12s0134g00140	Terpene_synth_C domain-containing protein	-	-	Vitis vinifera
																		VIT_12s0134g00140
																		ortholog
															6	VITVI|EnsemblGenome=VIT_09s0002g05320|UniProtKB=F6HX49	VIT_09s0002g05320	Fe2OG dioxygenase domain-containing protein	FE2OG DIOXYGENASE DOMAIN-CONTAINING PROTEIN (PTHR47990:SF153)	oxygenase	Vitis vinifera
																		VIT_09s0002g05320
																		ortholog
															7	VITVI|EnsemblGenome=VIT_08s0032g00240|UniProtKB=F6I3L7	VIT_08s0032g00240	Uncharacterized protein	CYTOCHROME P450 71D7 (PTHR47956:SF107)	oxygenase	Vitis vinifera
																		VIT_08s0032g00240
																		ortholog
															8	VITVI|EnsemblGenome=VIT_12s0028g03260|UniProtKB=F6H5F3	VIT_12s0028g03260	Aminotran_1_2 domain-containing protein	TYROSINE AMINOTRANSFERASE (PTHR45744:SF11)	transaminase	Vitis vinifera
																		VIT_12s0028g03260
																		ortholog
															9	VITVI|EnsemblGenome=VIT_03s0038g02050|UniProtKB=F6I119	VIT_03s0038g02050	Dirigent protein	DIRIGENT PROTEIN 23 (PTHR21495:SF80)	-	Vitis vinifera
																		VIT_03s0038g02050
																		ortholog
															10	VITVI|EnsemblGenome=VIT_04s0023g01600|UniProtKB=D7SPF5	VIT_04s0023g01600	Uncharacterized protein	TRANSMEMBRANE PROTEIN TAUE-RELATED (PTHR14255:SF31)	ubiquitin-protein ligase	Vitis vinifera
																		VIT_04s0023g01600
																		ortholog
															11	VITVI|EnsemblGenome=VIT_12s0057g00060|UniProtKB=F6HHI4	VIT_12s0057g00060	Uncharacterized protein	OS04G0635500 PROTEIN (PTHR33090:SF28)	-	Vitis vinifera
																		VIT_12s0057g00060
																		ortholog
															12	VITVI|EnsemblGenome=VIT_14s0066g01960|UniProtKB=F6HV36	VIT_14s0066g01960	ZnMc domain-containing protein	ZNMC DOMAIN-CONTAINING PROTEIN (PTHR10201:SF213)	metalloprotease	Vitis vinifera
																		VIT_14s0066g01960
																		ortholog
															13	VITVI|EnsemblGenome=VIT_02s0025g02920|UniProtKB=D7TVU3	VIT_02s0025g02920	Uncharacterized protein	CAFFEIC ACID 3-O-METHYLTRANSFERASE 1-LIKE (PTHR11746:SF151)	methyltransferase	Vitis vinifera
																		VIT_02s0025g02920
																		ortholog
															14	VITVI|EnsemblGenome=VIT_01s0010g00760|UniProtKB=D7TA96	VIT_01s0010g00760	Uncharacterized protein	-	-	Vitis vinifera
																		VIT_01s0010g00760
																		ortholog
															15	VITVI|EnsemblGenome=VIT_10s0405g00040|UniProtKB=F6GZA8	VIT_10s0405g00040	Cytochrome b561 and DOMON domain-containing protein	DOMON DOMAIN-CONTAINING PROTEIN (PTHR23130:SF167)	-	Vitis vinifera
																		VIT_10s0405g00040
																		ortholog
															16	VITVI|EnsemblGenome=VIT_02s0025g03680|UniProtKB=F6HUD5	VIT_02s0025g03680	Tubulin beta chain	TUBULIN BETA-8 CHAIN (PTHR11588:SF306)	tubulin	Vitis vinifera
																		VIT_02s0025g03680
																		ortholog
															17	VITVI|EnsemblGenome=VIT_12s0035g00650|UniProtKB=D7TGW2	VIT_12s0035g00650	Uncharacterized protein	-	-	Vitis vinifera
																		VIT_12s0035g00650
																		ortholog
															18	VITVI|EnsemblGenome=VIT_02s0025g03320|UniProtKB=F6HUB7	VIT_02s0025g03320	Uncharacterized protein	CYTOCHROME P450 86A7 (PTHR24296:SF2)	oxygenase	Vitis vinifera
																		VIT_02s0025g03320
																		ortholog
															19	VITVI|EnsemblGenome=VIT_09s0002g06610|UniProtKB=F6HXC3	VIT_09s0002g06610	Uncharacterized protein	POLYGALACTURONASE/GLYCOSIDE HYDROLASE FAMILY PROTEIN (PTHR31375:SF191)	-	Vitis vinifera
																		VIT_09s0002g06610
																		ortholog
															20	VITVI|EnsemblGenome=VIT_16s0100g00230|UniProtKB=F6HP77	VIT_16s0100g00230	GMC_OxRdtase_N domain-containing protein	GMC_OXRDTASE_N DOMAIN-CONTAINING PROTEIN (PTHR45968:SF31)	-	Vitis vinifera
																		VIT_16s0100g00230
																		ortholog
															21	VITVI|EnsemblGenome=VIT_13s0067g01200|UniProtKB=F6HCB7	VIT_13s0067g01200	Cellulase	ENDOGLUCANASE 15 (PTHR22298:SF125)	-	Vitis vinifera
																		VIT_13s0067g01200
																		ortholog
															22	VITVI|EnsemblGenome=VIT_04s0044g00190|UniProtKB=D7U461	VIT_04s0044g00190	PKS_ER domain-containing protein	CINNAMYL ALCOHOL DEHYDROGENASE 9-RELATED (PTHR42683:SF52)	oxidoreductase	Vitis vinifera
																		VIT_04s0044g00190
																		ortholog
														S6 specific nobel
														1	VITVI|EnsemblGenome=VIT_16s0022g01190|UniProtKB=F6HAS1	VIT_16s0022g01190	Uncharacterized protein	CHALCONE SYNTHASE (PTHR11877:SF14)	transferase	Vitis vinifera
																	VIT_16s0022g01190
																	ortholog
															2	VITVI|EnsemblGenome=VIT_11s0052g01190|UniProtKB=F6GXE8	VIT_11s0052g01190	Xyloglucan endotransglucosylase/hydrolase	XYLOGLUCAN ENDOTRANSGLUCOSYLASE/HYDROLASE (PTHR31062:SF254)	hydrolase	Vitis vinifera
																		VIT_11s0052g01190
																		ortholog
															3	VITVI|EnsemblGenome=VIT_08s0007g04000|UniProtKB=F6HKH0	VIT_08s0007g04000	Uncharacterized protein	-	-	Vitis vinifera
																		VIT_08s0007g04000
																		ortholog
															4	VITVI|EnsemblGenome=VIT_04s0044g01150|UniProtKB=F6I0F5	VIT_04s0044g01150	Aminotran_5 domain-containing protein	CYSTEINE DESULFURASE 1, CHLOROPLASTIC (PTHR43586:SF8)	lyase	Vitis vinifera
																		VIT_04s0044g01150
																		ortholog
															5	VITVI|EnsemblGenome=VIT_07s0005g03400|UniProtKB=D7U302	VIT_07s0005g03400	Uncharacterized protein	12S SEED STORAGE PROTEIN CRC (PTHR31189:SF35)	-	Vitis vinifera
																		VIT_07s0005g03400
																		ortholog
															6	VITVI|EnsemblGenome=VIT_02s0012g02190|UniProtKB=F6HT44	VIT_02s0012g02190	Uncharacterized protein	CELLULOSE SYNTHASE-LIKE PROTEIN D2 (PTHR13301:SF58)	DNA-binding transcription factor	Vitis vinifera
																		VIT_02s0012g02190
																		ortholog
															7	VITVI|EnsemblGenome=VIT_17s0000g04830|UniProtKB=D7SIP4	VIT_17s0000g04830	DNA polymerase epsilon subunit	DNA POLYMERASE EPSILON SUBUNIT 2 (PTHR12708:SF0)	DNA-directed DNA polymerase	Vitis vinifera
																		VIT_17s0000g04830
																		ortholog
															8	VITVI|EnsemblGenome=VIT_13s0074g00610|UniProtKB=F6I5W2	VIT_13s0074g00610	Glycosyltransferase	GLYCOSYLTRANSFERASE (PTHR48044:SF29)	glycosyltransferase	Vitis vinifera
																		VIT_13s0074g00610
																		ortholog
															9	VITVI|EnsemblGenome=VIT_19s0027g01880|UniProtKB=D7SWM7	VIT_19s0027g01880	Aa_trans domain-containing protein	AA_TRANS DOMAIN-CONTAINING PROTEIN (PTHR48017:SF114)	-	Vitis vinifera
																		VIT_19s0027g01880
																		ortholog
															10	VITVI|EnsemblGenome=VIT_14s0219g00030|UniProtKB=F6GX56	VIT_14s0219g00030	RING-type domain-containing protein	RING-TYPE DOMAIN-CONTAINING PROTEIN (PTHR23328:SF0)	-	Vitis vinifera
																		VIT_14s0219g00030
																		ortholog
															11	VITVI|EnsemblGenome=VIT_12s0057g01030|UniProtKB=D7TD72	VIT_12s0057g01030	Glucose-6-phosphate 1-dehydrogenase	GLUCOSE-6-PHOSPHATE 1-DEHYDROGENASE (PTHR23429:SF9)	dehydrogenase	Vitis vinifera
																		VIT_12s0057g01030
																		ortholog
															12	VITVI|EnsemblGenome=VIT_01s0011g03720|UniProtKB=F6HFN6	VIT_01s0011g03720	BHLH domain-containing protein	TRANSCRIPTION FACTOR BHLH75 (PTHR12565:SF367)	-	Vitis vinifera
																		VIT_01s0011g03720
																		ortholog
															13	VITVI|EnsemblGenome=VIT_01s0011g02240|UniProtKB=F6HF42	VIT_01s0011g02240	Uncharacterized protein	METAL-NICOTIANAMINE TRANSPORTER YSL7-RELATED (PTHR31645:SF20)	transporter	Vitis vinifera
																		VIT_01s0011g02240
																		ortholog
															14	VITVI|EnsemblGenome=VIT_19s0014g01600|UniProtKB=F6H1X6	VIT_19s0014g01600	PMR5N domain-containing protein	PROTEIN TRICHOME BIREFRINGENCE-LIKE 31 (PTHR32285:SF217)	-	Vitis vinifera
																		VIT_19s0014g01600
																		ortholog
															15	VITVI|EnsemblGenome=VIT_03s0091g00280|UniProtKB=D7SXV5	VIT_03s0091g00280	Cyclin N-terminal domain-containing protein	CYCLIN-A3-4 (PTHR10177:SF504)	kinase activator	Vitis vinifera
																		VIT_03s0091g00280
																		ortholog
															16	VITVI|EnsemblGenome=VIT_12s0028g02630|UniProtKB=E0CTM2	VIT_12s0028g02630	Uncharacterized protein	RAC-LIKE GTP-BINDING PROTEIN 7 (PTHR24072:SF286)	small GTPase	Vitis vinifera
																		VIT_12s0028g02630
																		ortholog
															17	VITVI|EnsemblGenome=VIT_04s0008g05080|UniProtKB=F6H3U2	VIT_04s0008g05080	Ammonium transporter	AMMONIUM TRANSPORTER 2 MEMBER 5 (PTHR43029:SF7)	transporter	Vitis vinifera
																		VIT_04s0008g05080
																		ortholog
														S7 specific nobel
															1	VITVI|EnsemblGenome=VIT_18s0089g00170|UniProtKB=D7SN13	VIT_18s0089g00170	Mannan endo-1,4-beta-mannosidase	MANNAN ENDO-1,4-BETA-MANNOSIDASE (PTHR31451:SF53)	-	Vitis vinifera
																		VIT_18s0089g00170
																		ortholog
																2	VITVI|EnsemblGenome=VIT_08s0056g01480|UniProtKB=F6HMN1	VIT_08s0056g01480	Uncharacterized protein	CATION/CALCIUM EXCHANGER 1 (PTHR12266:SF24)	primary active transporter	Vitis vinifera
																			VIT_08s0056g01480
																			ortholog
																3	VITVI|EnsemblGenome=VIT_06s0009g02920|UniProtKB=F6HA84	VIT_06s0009g02920	Uncharacterized protein	FLAVONOID 3'-MONOOXYGENASE (PTHR47956:SF12)	oxygenase	Vitis vinifera
																			VIT_06s0009g02920
																			ortholog
																4	VITVI|EnsemblGenome=VIT_04s0008g01530|UniProtKB=F6H3Q4	VIT_04s0008g01530	Uncharacterized protein	17.6 KDA CLASS II HEAT SHOCK PROTEIN-RELATED (PTHR11527:SF356)	chaperone	Vitis vinifera
																			VIT_04s0008g01530
																			ortholog
																5	VITVI|EnsemblGenome=VIT_16s0022g01020|UniProtKB=F6HAT3	VIT_16s0022g01020	Uncharacterized protein	CHALCONE SYNTHASE (PTHR11877:SF14)	transferase	Vitis vinifera
																			VIT_16s0022g01020
																			ortholog
																6	VITVI|EnsemblGenome=VIT_17s0000g02700|UniProtKB=D7SJ80	VIT_17s0000g02700	Uncharacterized protein	ALPHA-DIOXYGENASE 2 (PTHR11903:SF25)	oxygenase	Vitis vinifera
																			VIT_17s0000g02700
																			ortholog
																7	VITVI|EnsemblGenome=VIT_06s0004g05250|UniProtKB=D7SKA5	VIT_06s0004g05250	Uncharacterized protein	OS03G0269601 PROTEIN (PTHR10811:SF73)	glycosyltransferase	Vitis vinifera
																			VIT_06s0004g05250
																			ortholog
																8	VITVI|EnsemblGenome=VIT_07s0129g00190|UniProtKB=F6HST6	VIT_07s0129g00190	Uncharacterized protein	CONDENSIN-2 COMPLEX SUBUNIT G2 (PTHR16199:SF4)	-	Vitis vinifera
																			VIT_07s0129g00190
																			ortholog
